# Supplementary material for: Clinical Significance and Molecular Annotation of Cellular Morphometric Subtypes in Lower Grade Gliomas discovered by Machine Learning: a retrospective multicentric study
Source: Research Square preprint supplement (doi:10.21203/rs.3.rs-770415/v1), 2021-08-12
Supplement: Supplementary file 1 [file 0853429e80a4fe8658e08afd.xlsx]

## Sheet: Sheet1
Supplementary Table 24. Kyoto Encyclopedia of Genes and Genomes (KEGG) pathway enrichment analysis on differentially expressed genes (DEGs).
ID	Description	GeneRatio	BgRatio	pvalue	p.adjust	qvalue	geneID	Count
hsa04915	Estrogen signaling pathway	11/121	138/8081	6.21846e-06	0.0012859	0.00123811	810/84699/3310/3860/3861/3866/3868/3872/192666/3881/3884	11
hsa05150	Staphylococcus aureus infection	9/121	96/8081	1.21886e-05	0.0012859	0.00123811	2266/3860/3861/3866/3868/3872/192666/3881/3884	9
hsa04610	Complement and coagulation cascades	7/121	85/8081	0.000266398	0.0187366	0.0180403	81494/2165/2244/2266/3818/3827/5104	7
hsa04060	Cytokine-cytokine receptor interaction	13/121	295/8081	0.000446622	0.0208671	0.0200916	6362/6369/970/1440/2919/6372/50616/55801/133396/3568/3569/8995/7066	13
hsa04657	IL-17 signaling pathway	7/121	94/8081	0.000494482	0.0208671	0.0200916	1440/2919/6372/3569/3934/5743/6278	7
hsa04080	Neuroactive ligand-receptor interaction	13/121	341/8081	0.00170569	0.0599835	0.0577541	885/1392/1814/2559/9248/3827/23566/4142/2832/4922/22953/59350/6753	13
hsa05144	Malaria	4/121	50/8081	0.00647796	0.155257	0.149487	1440/3569/4233/6401	4
hsa04668	TNF signaling pathway	6/121	112/8081	0.00655743	0.155257	0.149487	84699/2919/6372/3569/5743/6401	6
hsa04950	Maturity onset diabetes of the young	3/121	26/8081	0.00662235	0.155257	0.149487	3172/6927/389692	3
hsa04744	Phototransduction	3/121	28/8081	0.00816515	0.172285	0.165882	810/9626/6010	3
hsa04061	Viral protein interaction with cytokine and cytokine receptor	5/121	100/8081	0.01687	0.308977	0.297493	6362/6369/2919/6372/3569	5
hsa05143	African trypanosomiasis	3/121	37/8081	0.0175722	0.308977	0.297493	3569/3827/6401	3
hsa00910	Nitrogen metabolism	2/121	17/8081	0.0261137	0.40479	0.389745	761/762	2
hsa05133	Pertussis	4/121	76/8081	0.0268581	0.40479	0.389745	810/6372/3569/653509	4
hsa04979	Cholesterol metabolism	3/121	50/8081	0.0385631	0.523828	0.504359	8647/336/345	3
hsa04742	Taste transduction	4/121	86/8081	0.0397215	0.523828	0.504359	255022/2559/9177/22953	4
hsa05410	Hypertrophic cardiomyopathy	4/121	90/8081	0.0456983	0.537372	0.5174	70/1674/3569/7139	4
hsa04614	Renin-angiotensin system	2/121	23/8081	0.0458421	0.537372	0.5174	3817/4142	2
hsa05134	Legionellosis	3/121	57/8081	0.0534401	0.593467	0.57141	2919/3310/3569	3
hsa04750	Inflammatory mediator regulation of TRP channels	4/121	98/8081	0.0590766	0.604288	0.581829	810/3827/255189/8989	4
hsa04640	Hematopoietic cell lineage	4/121	99/8081	0.0608813	0.604288	0.581829	1440/3568/3569/7066	4
hsa00590	Arachidonic acid metabolism	3/121	61/8081	0.0630064	0.604288	0.581829	246/255189/5743	3
hsa00591	Linoleic acid metabolism	2/121	29/8081	0.0694501	0.618398	0.595414	246/255189	2
hsa04625	C-type lectin receptor signaling pathway	4/121	104/8081	0.0703391	0.618398	0.595414	810/10332/3569/5743	4
hsa05031	Amphetamine addiction	3/121	69/8081	0.0843102	0.711578	0.685132	810/84699/6531	3
hsa04726	Serotonergic synapse	4/121	115/8081	0.0936187	0.746689	0.718938	246/9177/255189/5743	4
hsa04630	JAK-STAT signaling pathway	5/121	162/8081	0.0955479	0.746689	0.718938	1440/50616/3568/3569/7066	5
hsa04721	Synaptic vesicle cycle	3/121	78/8081	0.111418	0.839613	0.808408	6572/6531/6534	3
hsa05204	Chemical carcinogenesis	3/121	83/8081	0.127747	0.890462	0.857367	2938/5743/6822	3
hsa05171	Coronavirus disease - COVID-19	6/121	232/8081	0.134483	0.890462	0.857367	1440/2165/2244/2266/3569/4142	6
hsa04975	Fat digestion and absorption	2/121	43/8081	0.135284	0.890462	0.857367	1208/8513	2
hsa04728	Dopaminergic synapse	4/121	132/8081	0.13574	0.890462	0.857367	810/84699/1814/6531	4
hsa02010	ABC transporters	2/121	45/8081	0.145564	0.890462	0.857367	8647/94160	2
hsa05034	Alcoholism	5/121	187/8081	0.148677	0.890462	0.857367	810/84699/1392/126961/6531	5
hsa04020	Calcium signaling pathway	6/121	240/8081	0.15057	0.890462	0.857367	810/2252/55283/4233/22953/89869	6
hsa04976	Bile secretion	3/121	90/8081	0.151927	0.890462	0.857367	8647/10599/6822	3
hsa04151	PI3K-Akt signaling pathway	8/121	354/8081	0.160569	0.901212	0.867717	1280/84699/1440/2252/3569/23566/4233/4908	8
hsa05323	Rheumatoid arthritis	3/121	93/8081	0.162709	0.901212	0.867717	2919/6372/3569	3
hsa05030	Cocaine addiction	2/121	49/8081	0.166575	0.901212	0.867717	84699/6531	2
hsa05414	Dilated cardiomyopathy	3/121	96/8081	0.173716	0.912295	0.878388	70/1674/7139	3
hsa04913	Ovarian steroidogenesis	2/121	51/8081	0.177271	0.912295	0.878388	255189/5743	2
hsa04261	Adrenergic signaling in cardiomyocytes	4/121	150/8081	0.187166	0.940288	0.905341	70/810/84699/7139	4
hsa05146	Amoebiasis	3/121	102/8081	0.196326	0.940854	0.905886	2919/3569/4583	3
hsa00730	Thiamine metabolism	1/121	16/8081	0.214639	0.940854	0.905886	251	1
hsa04370	VEGF signaling pathway	2/121	59/8081	0.220951	0.940854	0.905886	255189/5743	2
hsa00120	Primary bile acid biosynthesis	1/121	17/8081	0.226422	0.940854	0.905886	6718	1
hsa04730	Long-term depression	2/121	60/8081	0.226482	0.940854	0.905886	1392/255189	2
hsa04725	Cholinergic synapse	3/121	113/8081	0.239434	0.940854	0.905886	1103/84699/6572	3
hsa05321	Inflammatory bowel disease	2/121	65/8081	0.254263	0.940854	0.905886	50616/3569	2
hsa04722	Neurotrophin signaling pathway	3/121	119/8081	0.2636	0.940854	0.905886	810/8767/4908	3
hsa04014	Ras signaling pathway	5/121	232/8081	0.267353	0.940854	0.905886	810/2252/4233/4908/255189	5
hsa04924	Renin secretion	2/121	69/8081	0.276552	0.940854	0.905886	810/1179	2
hsa04010	MAPK signaling pathway	6/121	294/8081	0.277722	0.940854	0.905886	2252/3310/4233/4908/255189/5801	6
hsa05120	Epithelial cell signaling in Helicobacter pylori infection	2/121	70/8081	0.282122	0.940854	0.905886	2919/4233	2
hsa05152	Tuberculosis	4/121	180/8081	0.283526	0.940854	0.905886	810/8767/10332/3569	4
hsa04611	Platelet activation	3/121	124/8081	0.283969	0.940854	0.905886	2244/2266/255189	3
hsa04520	Adherens junction	2/121	71/8081	0.287689	0.940854	0.905886	4233/5787	2
hsa05218	Melanoma	2/121	72/8081	0.293252	0.940854	0.905886	2252/4233	2
hsa04964	Proximal tubule bicarbonate reclamation	1/121	23/8081	0.293526	0.940854	0.905886	762	1
hsa04918	Thyroid hormone synthesis	2/121	75/8081	0.309902	0.940854	0.905886	84699/7173	2
hsa00592	alpha-Linolenic acid metabolism	1/121	25/8081	0.314585	0.940854	0.905886	255189	1
hsa03320	PPAR signaling pathway	2/121	76/8081	0.315437	0.940854	0.905886	336/345	2
hsa04270	Vascular smooth muscle contraction	3/121	133/8081	0.32093	0.940854	0.905886	810/4629/255189	3
hsa05412	Arrhythmogenic right ventricular cardiomyopathy	2/121	77/8081	0.320962	0.940854	0.905886	1674/1829	2
hsa04062	Chemokine signaling pathway	4/121	192/8081	0.324155	0.940854	0.905886	6362/6369/2919/6372	4
hsa05202	Transcriptional misregulation in cancer	4/121	192/8081	0.324155	0.940854	0.905886	126961/3569/4233/5081	4
hsa00790	Folate biosynthesis	1/121	26/8081	0.32488	0.940854	0.905886	251	1
hsa00980	Metabolism of xenobiotics by cytochrome P450	2/121	78/8081	0.326476	0.940854	0.905886	2938/6822	2
hsa05167	Kaposi sarcoma-associated herpesvirus infection	4/121	193/8081	0.327566	0.940854	0.905886	810/2919/3569/5743	4
hsa01521	EGFR tyrosine kinase inhibitor resistance	2/121	79/8081	0.331979	0.940854	0.905886	3569/4233	2
hsa01040	Biosynthesis of unsaturated fatty acids	1/121	27/8081	0.335022	0.940854	0.905886	3992	1
hsa05162	Measles	3/121	139/8081	0.34563	0.940854	0.905886	10332/3310/3569	3
hsa05418	Fluid shear stress and atherosclerosis	3/121	139/8081	0.34563	0.940854	0.905886	810/2938/6401	3
hsa04392	Hippo signaling pathway - multiple species	1/121	29/8081	0.354853	0.940854	0.905886	166824	1
hsa00630	Glyoxylate and dicarboxylate metabolism	1/121	30/8081	0.364548	0.940854	0.905886	189	1
hsa04911	Insulin secretion	2/121	86/8081	0.370107	0.940854	0.905886	885/84699	2
hsa01523	Antifolate resistance	1/121	31/8081	0.374099	0.940854	0.905886	3569	1
hsa04260	Cardiac muscle contraction	2/121	87/8081	0.375489	0.940854	0.905886	70/7139	2
hsa00512	Mucin type O-glycan biosynthesis	1/121	32/8081	0.383507	0.940854	0.905886	11227	1
hsa04015	Rap1 signaling pathway	4/121	210/8081	0.3857	0.940854	0.905886	810/2252/23566/4233	4
hsa05226	Gastric cancer	3/121	149/8081	0.386597	0.940854	0.905886	2252/4233/4583	3
hsa03040	Spliceosome	3/121	151/8081	0.39473	0.940854	0.905886	3310/26835/26834	3
hsa04145	Phagosome	3/121	152/8081	0.398787	0.940854	0.905886	10332/8685/653509	3
hsa04921	Oxytocin signaling pathway	3/121	154/8081	0.406879	0.940854	0.905886	810/255189/5743	3
hsa04912	GnRH signaling pathway	2/121	93/8081	0.407369	0.940854	0.905886	810/255189	2
hsa00350	Tyrosine metabolism	1/121	36/8081	0.419756	0.940854	0.905886	7173	1
hsa04070	Phosphatidylinositol signaling system	2/121	97/8081	0.428189	0.940854	0.905886	810/89869	2
hsa05215	Prostate cancer	2/121	97/8081	0.428189	0.940854	0.905886	84699/354	2
hsa00250	Alanine, aspartate and glutamate metabolism	1/121	37/8081	0.428483	0.940854	0.905886	189	1
hsa04310	Wnt signaling pathway	3/121	160/8081	0.430959	0.940854	0.905886	6425/11197/8840	3
hsa00564	Glycerophospholipid metabolism	2/121	98/8081	0.433335	0.940854	0.905886	1103/255189	2
hsa04925	Aldosterone synthesis and secretion	2/121	98/8081	0.433335	0.940854	0.905886	810/84699	2
hsa05163	Human cytomegalovirus infection	4/121	225/8081	0.436566	0.940854	0.905886	810/84699/3569/5743	4
hsa04933	AGE-RAGE signaling pathway in diabetic complications	2/121	100/8081	0.443554	0.940854	0.905886	3569/6401	2
hsa04916	Melanogenesis	2/121	101/8081	0.448626	0.940854	0.905886	810/84699	2
hsa04972	Pancreatic secretion	2/121	102/8081	0.453672	0.940854	0.905886	885/1179	2
hsa05142	Chagas disease	2/121	102/8081	0.453672	0.940854	0.905886	3569/3827	2
hsa00260	Glycine, serine and threonine metabolism	1/121	40/8081	0.453891	0.940854	0.905886	189	1
hsa05033	Nicotine addiction	1/121	40/8081	0.453891	0.940854	0.905886	2559	1
hsa04022	cGMP-PKG signaling pathway	3/121	167/8081	0.458607	0.940854	0.905886	810/84699/3827	3
hsa04974	Protein digestion and absorption	2/121	103/8081	0.458692	0.940854	0.905886	1280/6564	2
hsa04216	Ferroptosis	1/121	41/8081	0.462109	0.940854	0.905886	246	1
hsa04064	NF-kappa B signaling pathway	2/121	104/8081	0.463685	0.940854	0.905886	2919/5743	2
hsa05332	Graft-versus-host disease	1/121	42/8081	0.470204	0.940854	0.905886	3569	1
hsa04928	Parathyroid hormone synthesis, secretion and action	2/121	106/8081	0.473592	0.940854	0.905886	84699/10568	2
hsa04659	Th17 cell differentiation	2/121	107/8081	0.478504	0.940854	0.905886	50616/3569	2
hsa04922	Glucagon signaling pathway	2/121	107/8081	0.478504	0.940854	0.905886	810/84699	2
hsa04931	Insulin resistance	2/121	108/8081	0.483389	0.940854	0.905886	84699/3569	2
hsa04962	Vasopressin-regulated water reabsorption	1/121	44/8081	0.486034	0.940854	0.905886	84699	1
hsa04930	Type II diabetes mellitus	1/121	46/8081	0.501394	0.961765	0.92602	389692	1
hsa00514	Other types of O-glycan biosynthesis	1/121	47/8081	0.508903	0.96479	0.928932	11227	1
hsa04621	NOD-like receptor signaling pathway	3/121	181/8081	0.512116	0.96479	0.928932	8767/2919/3569	3
hsa00565	Ether lipid metabolism	1/121	49/8081	0.523585	0.966435	0.930516	255189	1
hsa04672	Intestinal immune network for IgA production	1/121	49/8081	0.523585	0.966435	0.930516	3569	1
hsa04935	Growth hormone synthesis, secretion and action	2/121	119/8081	0.535226	0.966435	0.930516	84699/6753	2
hsa04152	AMPK signaling pathway	2/121	120/8081	0.539761	0.966435	0.930516	84699/3172	2
hsa04961	Endocrine and other factor-regulated calcium reabsorption	1/121	53/8081	0.551656	0.966435	0.930516	3817	1
hsa05320	Autoimmune thyroid disease	1/121	53/8081	0.551656	0.966435	0.930516	7173	1
hsa05022	Pathways of neurodegeneration - multiple diseases	7/121	475/8081	0.573051	0.966435	0.930516	810/8701/3569/4747/4741/5743/6531	7
hsa00480	Glutathione metabolism	1/121	57/8081	0.578086	0.966435	0.930516	2938	1
hsa01212	Fatty acid metabolism	1/121	57/8081	0.578086	0.966435	0.930516	3992	1
hsa04923	Regulation of lipolysis in adipocytes	1/121	57/8081	0.578086	0.966435	0.930516	5743	1
hsa04114	Oocyte meiosis	2/121	129/8081	0.579203	0.966435	0.930516	810/89869	2
hsa04926	Relaxin signaling pathway	2/121	129/8081	0.579203	0.966435	0.930516	84699/59350	2
hsa04978	Mineral absorption	1/121	59/8081	0.590716	0.966435	0.930516	10568	1
hsa00140	Steroid hormone biosynthesis	1/121	61/8081	0.60297	0.966435	0.930516	6718	1
hsa00561	Glycerolipid metabolism	1/121	61/8081	0.60297	0.966435	0.930516	8513	1
hsa04213	Longevity regulating pathway - multiple species	1/121	62/8081	0.60896	0.966435	0.930516	3310	1
hsa04623	Cytosolic DNA-sensing pathway	1/121	63/8081	0.614861	0.966435	0.930516	3569	1
hsa04927	Cortisol synthesis and secretion	1/121	65/8081	0.626398	0.966435	0.930516	84699	1
hsa04720	Long-term potentiation	1/121	67/8081	0.637593	0.966435	0.930516	810	1
hsa04810	Regulation of actin cytoskeleton	3/121	218/8081	0.63878	0.966435	0.930516	2252/3827/4629	3
hsa00830	Retinol metabolism	1/121	68/8081	0.643064	0.966435	0.930516	1592	1
hsa04664	Fc epsilon RI signaling pathway	1/121	68/8081	0.643064	0.966435	0.930516	255189	1
hsa05211	Renal cell carcinoma	1/121	69/8081	0.648454	0.966435	0.930516	4233	1
hsa05230	Central carbon metabolism in cancer	1/121	70/8081	0.653763	0.966435	0.930516	4233	1
hsa04072	Phospholipase D signaling pathway	2/121	148/8081	0.654243	0.966435	0.930516	23566/255189	2
hsa04723	Retrograde endocannabinoid signaling	2/121	148/8081	0.654243	0.966435	0.930516	2559/5743	2
hsa00982	Drug metabolism - cytochrome P450	1/121	72/8081	0.664144	0.966435	0.930516	2938	1
hsa05223	Non-small cell lung cancer	1/121	72/8081	0.664144	0.966435	0.930516	4233	1
hsa00562	Inositol phosphate metabolism	1/121	73/8081	0.669219	0.966435	0.930516	89869	1
hsa01524	Platinum drug resistance	1/121	73/8081	0.669219	0.966435	0.930516	2938	1
hsa04115	p53 signaling pathway	1/121	73/8081	0.669219	0.966435	0.930516	5268	1
hsa04934	Cushing syndrome	2/121	155/8081	0.679098	0.966435	0.930516	84699/1392	2
hsa05214	Glioma	1/121	75/8081	0.67914	0.966435	0.930516	810	1
hsa04218	Cellular senescence	2/121	156/8081	0.682529	0.966435	0.930516	810/3569	2
hsa04971	Gastric acid secretion	1/121	76/8081	0.683989	0.966435	0.930516	810	1
hsa05100	Bacterial invasion of epithelial cells	1/121	77/8081	0.688766	0.966435	0.930516	4233	1
hsa05140	Leishmaniasis	1/121	77/8081	0.688766	0.966435	0.930516	5743	1
hsa04217	Necroptosis	2/121	159/8081	0.692643	0.966435	0.930516	246/255189	2
hsa04612	Antigen processing and presentation	1/121	78/8081	0.693471	0.966435	0.930516	3310	1
hsa05161	Hepatitis B	2/121	162/8081	0.702492	0.966435	0.930516	84699/3569	2
hsa00983	Drug metabolism - other enzymes	1/121	80/8081	0.70267	0.966435	0.930516	2938	1
hsa04146	Peroxisome	1/121	83/8081	0.715959	0.966435	0.930516	189	1
hsa05131	Shigellosis	3/121	246/8081	0.718336	0.966435	0.930516	8767/126961/89869	3
hsa05225	Hepatocellular carcinoma	2/121	168/8081	0.721413	0.966435	0.930516	2938/4233	2
hsa04512	ECM-receptor interaction	1/121	88/8081	0.736809	0.966435	0.930516	1280	1
hsa04211	Longevity regulating pathway	1/121	89/8081	0.740794	0.966435	0.930516	84699	1
hsa04727	GABAergic synapse	1/121	89/8081	0.740794	0.966435	0.930516	2559	1
hsa05032	Morphine addiction	1/121	91/8081	0.748584	0.966435	0.930516	2559	1
hsa05222	Small cell lung cancer	1/121	92/8081	0.752391	0.966435	0.930516	5743	1
hsa04970	Salivary secretion	1/121	93/8081	0.756141	0.966435	0.930516	810	1
hsa04350	TGF-beta signaling pathway	1/121	94/8081	0.759835	0.966435	0.930516	5308	1
hsa03015	mRNA surveillance pathway	1/121	97/8081	0.770587	0.966435	0.930516	8731	1
hsa04666	Fc gamma R-mediated phagocytosis	1/121	97/8081	0.770587	0.966435	0.930516	255189	1
hsa04713	Circadian entrainment	1/121	97/8081	0.770587	0.966435	0.930516	810	1
hsa03013	RNA transport	2/121	186/8081	0.772221	0.966435	0.930516	26835/26834	2
hsa01522	Endocrine resistance	1/121	98/8081	0.774064	0.966435	0.930516	8647	1
hsa05231	Choline metabolism in cancer	1/121	98/8081	0.774064	0.966435	0.930516	255189	1
hsa05020	Prion disease	3/121	273/8081	0.781669	0.967555	0.931595	84699/3310/3569	3
hsa04620	Toll-like receptor signaling pathway	1/121	104/8081	0.793854	0.967555	0.931595	3569	1
hsa05130	Pathogenic Escherichia coli infection	2/121	197/8081	0.79917	0.967555	0.931595	3569/4629	2
hsa04510	Focal adhesion	2/121	201/8081	0.808254	0.967555	0.931595	1280/4233	2
hsa04066	HIF-1 signaling pathway	1/121	109/8081	0.809025	0.967555	0.931595	3569	1
hsa03008	Ribosome biogenesis in eukaryotes	1/121	111/8081	0.814779	0.967555	0.931595	23560	1
hsa05145	Toxoplasmosis	1/121	112/8081	0.817591	0.967555	0.931595	3310	1
hsa04724	Glutamatergic synapse	1/121	114/8081	0.823089	0.967555	0.931595	255189	1
hsa01200	Carbon metabolism	1/121	118/8081	0.833596	0.967555	0.931595	189	1
hsa04071	Sphingolipid signaling pathway	1/121	119/8081	0.836124	0.967555	0.931595	3827	1
hsa04024	cAMP signaling pathway	2/121	216/8081	0.839166	0.967555	0.931595	810/84699	2
hsa04919	Thyroid hormone signaling pathway	1/121	121/8081	0.841068	0.967555	0.931595	89869	1
hsa05166	Human T-cell leukemia virus 1 infection	2/121	219/8081	0.844785	0.967555	0.931595	84699/3569	2
hsa05206	MicroRNAs in cancer	3/121	310/8081	0.849109	0.967555	0.931595	4233/5743/5268	3
hsa04068	FoxO signaling pathway	1/121	131/8081	0.863652	0.967555	0.931595	3569	1
hsa05322	Systemic lupus erythematosus	1/121	136/8081	0.873719	0.967555	0.931595	126961	1
hsa04371	Apelin signaling pathway	1/121	137/8081	0.875642	0.967555	0.931595	810	1
hsa04910	Insulin signaling pathway	1/121	137/8081	0.875642	0.967555	0.931595	810	1
hsa05135	Yersinia infection	1/121	137/8081	0.875642	0.967555	0.931595	3569	1
hsa05165	Human papillomavirus infection	3/121	331/8081	0.878781	0.967555	0.931595	1280/84699/5743	3
hsa05012	Parkinson disease	2/121	249/8081	0.891961	0.967555	0.931595	810/6531	2
hsa05132	Salmonella infection	2/121	249/8081	0.891961	0.967555	0.931595	8767/3569	2
hsa05224	Breast cancer	1/121	147/8081	0.893346	0.967555	0.931595	2252	1
hsa04514	Cell adhesion molecules	1/121	149/8081	0.896575	0.967555	0.931595	6401	1
hsa04932	Non-alcoholic fatty liver disease	1/121	150/8081	0.898153	0.967555	0.931595	3569	1
hsa01240	Biosynthesis of cofactors	1/121	156/8081	0.90713	0.967555	0.931595	251	1
hsa04390	Hippo signaling pathway	1/121	157/8081	0.908548	0.967555	0.931595	166824	1
hsa04740	Olfactory transduction	4/121	447/8081	0.908819	0.967555	0.931595	810/138882/81285/219874	4
hsa05014	Amyotrophic lateral sclerosis	3/121	364/8081	0.915098	0.967555	0.931595	8701/4747/4741	3
hsa05010	Alzheimer disease	3/121	369/8081	0.919653	0.967555	0.931595	810/3569/5743	3
hsa04530	Tight junction	1/121	169/8081	0.923977	0.967555	0.931595	4629	1
hsa04141	Protein processing in endoplasmic reticulum	1/121	171/8081	0.926285	0.967555	0.931595	3310	1
hsa05164	Influenza A	1/121	171/8081	0.926285	0.967555	0.931595	3569	1
hsa04360	Axon guidance	1/121	182/8081	0.937789	0.974742	0.938514	4233	1
hsa05016	Huntington disease	2/121	306/8081	0.947261	0.974742	0.938514	84699/8701	2
hsa05169	Epstein-Barr virus infection	1/121	202/8081	0.954331	0.974742	0.938514	3569	1
hsa05203	Viral carcinogenesis	1/121	204/8081	0.955723	0.974742	0.938514	84699	1
hsa05205	Proteoglycans in cancer	1/121	205/8081	0.956403	0.974742	0.938514	4233	1
hsa05170	Human immunodeficiency virus 1 infection	1/121	212/8081	0.960883	0.974742	0.938514	810	1
hsa04714	Thermogenesis	1/121	231/8081	0.970869	0.98016	0.943731	84699	1
hsa04144	Endocytosis	1/121	252/8081	0.978987	0.983648	0.94709	3310	1
hsa05168	Herpes simplex virus 1 infection	2/121	498/8081	0.996115	0.996115	0.959093	3569/441234	2
