# Supplementary material for: Clinical Significance and Molecular Annotation of Cellular Morphometric Subtypes in Lower Grade Gliomas discovered by Machine Learning: a retrospective multicentric study
Source: Research Square preprint supplement (doi:10.21203/rs.3.rs-770415/v1), 2021-08-12
Supplement: Supplementary file 1 [file e9d768cd6de70e10d5a21c0e.pdf]

a

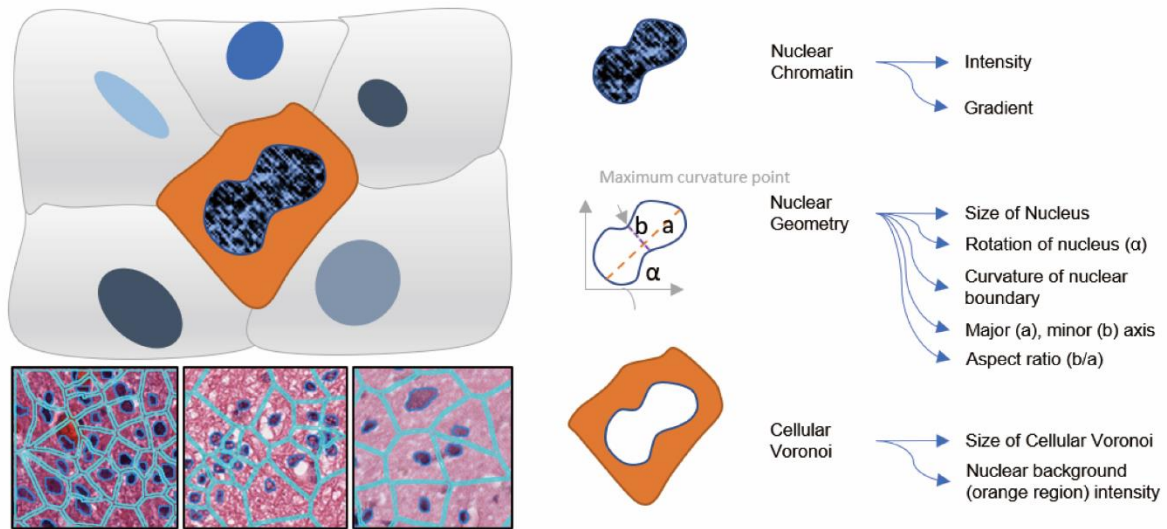

b

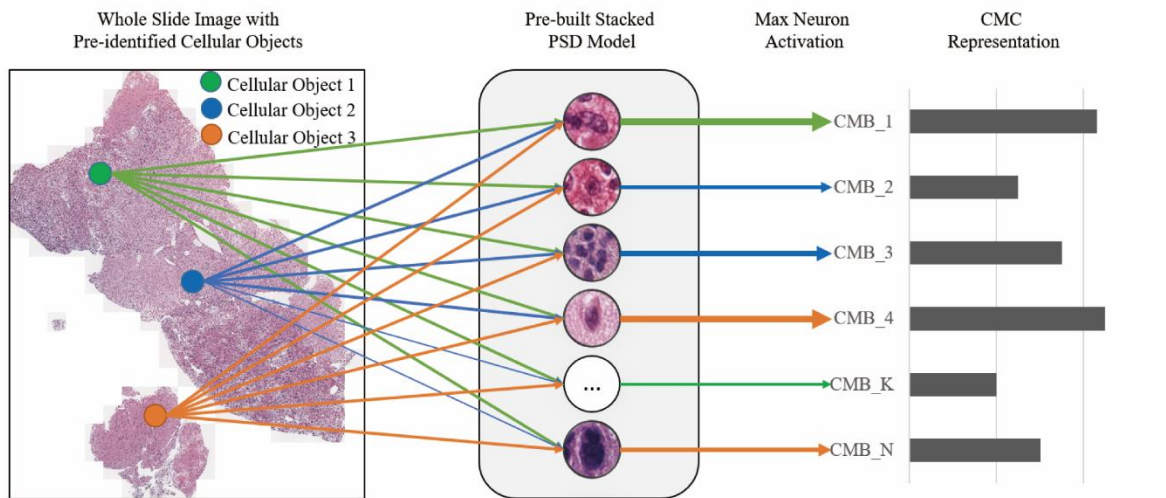

**Extended Data Figure 1. Cellular level phenotype extraction and illustration of workflows for both unsupervised CMB discovery and the construction of patient-level CMC representation. a.** Definition of phenotypes related to cellular-object; **b.** Pre-built unsupervised learning model (Stacked PSD) provides efficient inference and construction of patient-level CMC representation.

a

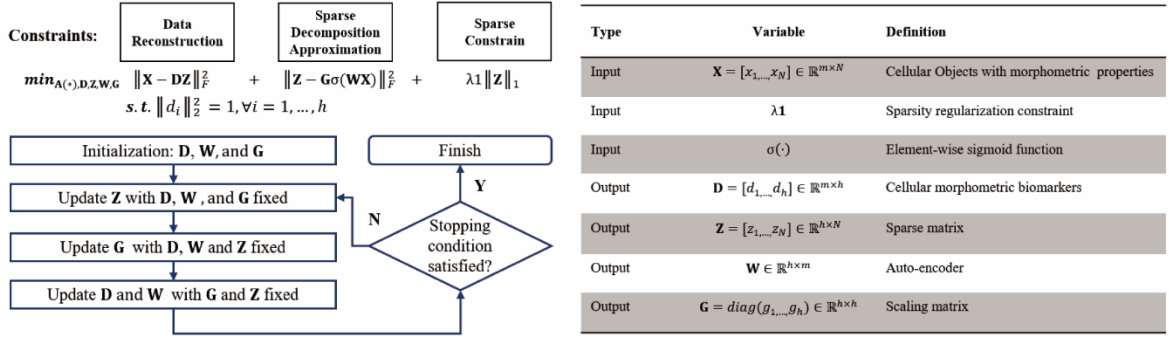

b

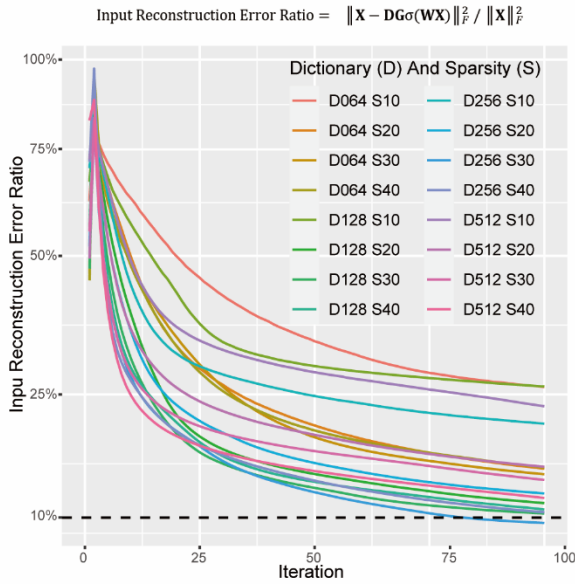

c

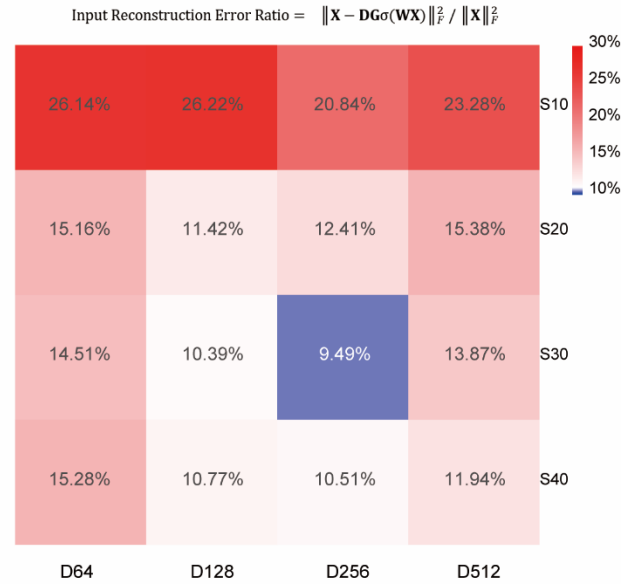

**Extended Data Figure 2. a.** Algorithmic flowchart for our unsupervised representation pipeline; **b.** Evaluation of input reconstruction error ratio during training with different combinations of dictionary size and sparsity; **c.** Final input reconstruction error ratio after training (at 100 iterations) with different combinations of dictionary size and sparsity.



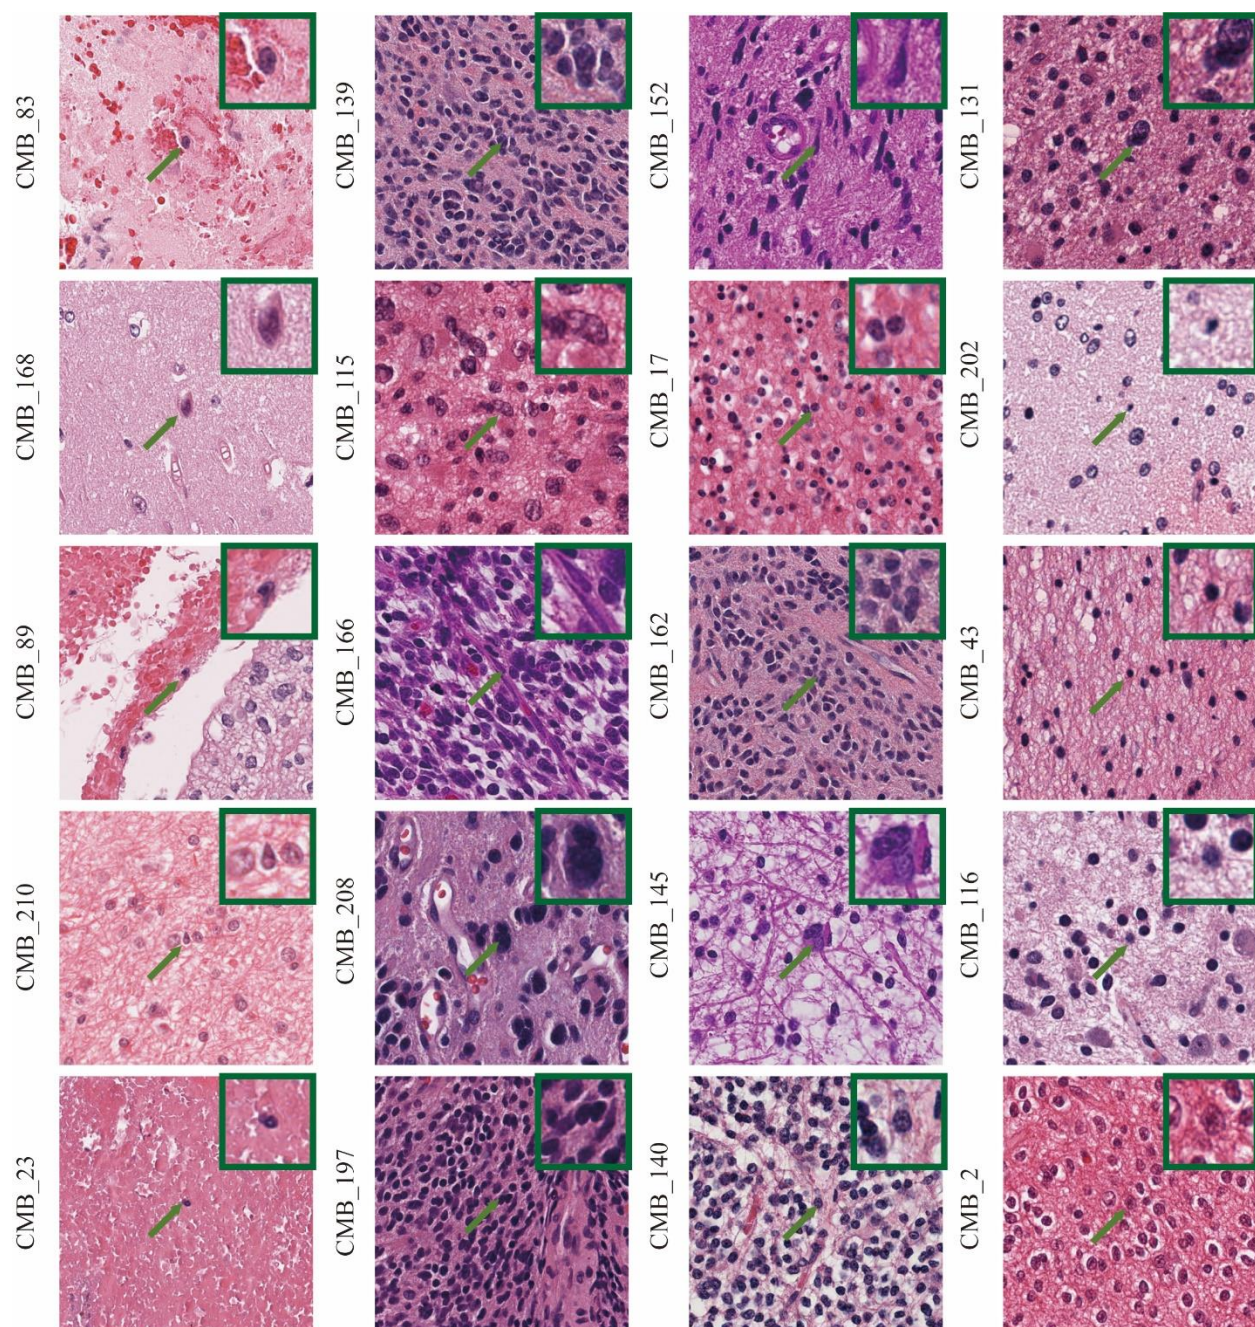

**Extended Data Figure 3. Examples of prognostically significant CMBs.** CMBs (pointed out with green arrows) are displayed within  $75.852 \mu\text{m} \times 75.852 \mu\text{m}$  neighborhood, where the top right zoom-in box illustrated each CMB in  $25.452 \mu\text{m} \times 25.452 \mu\text{m}$  neighborhood, and the CMBs are sorted ascendingly based on their hazard ratio in column-major order.

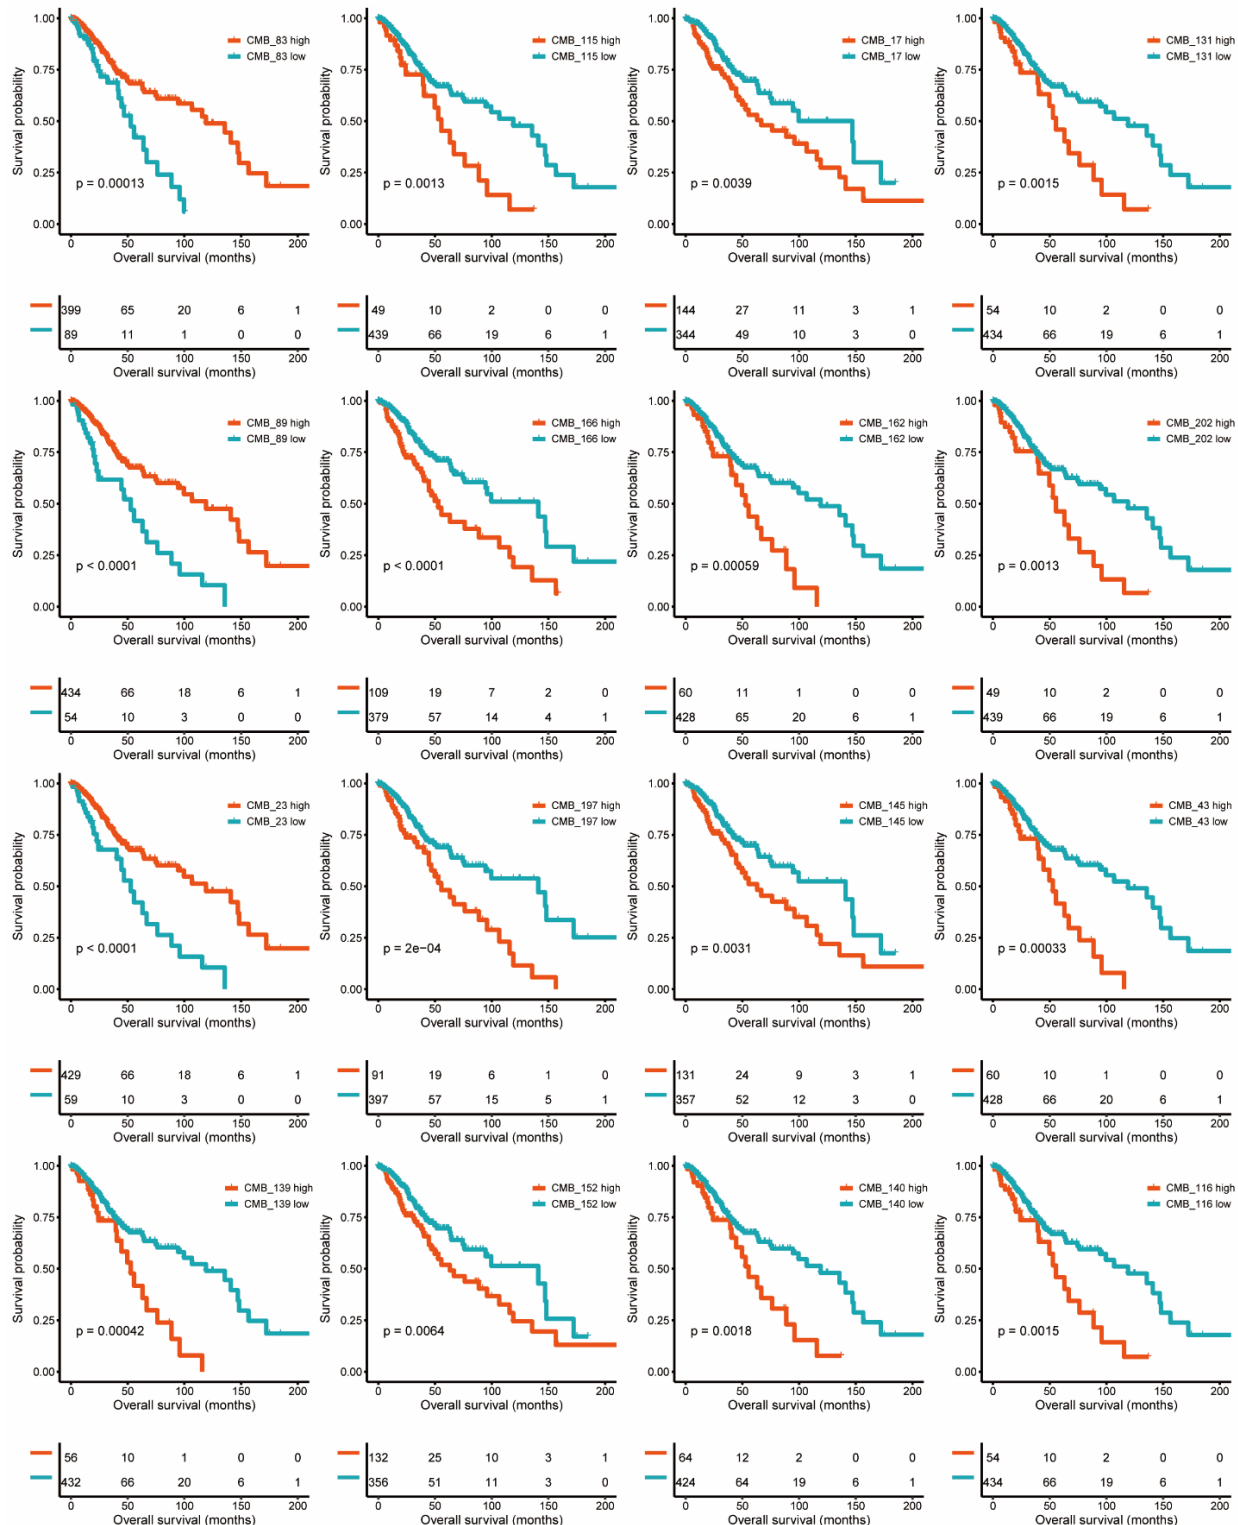

**Extended Data Figure 4. The prognostic impact of the level of cellular morphometric biomarker (CMB) on TCGA-LGG cohort.** TCGA-LGG patients within CMB-low and CMB-high groups (cutoffs summarized in Supplementary Table 12) show significant difference in survival.



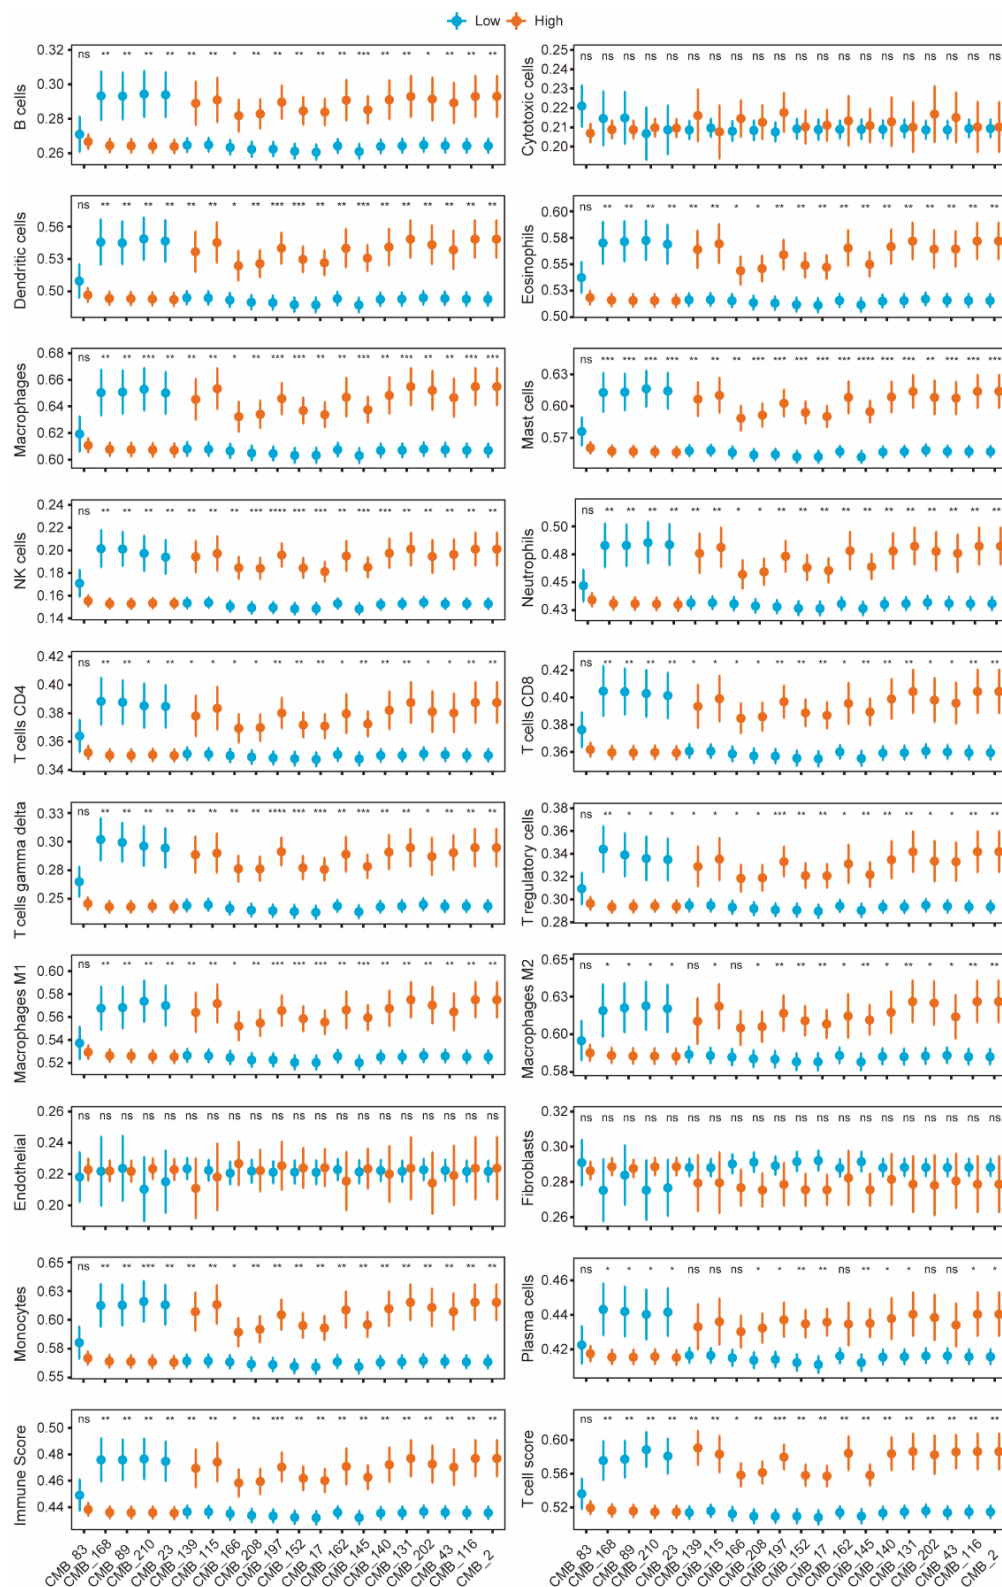

**Extended Data Figure 5.** TCGA-LGG patients within high and low cellular morphometric biomarker groups (cutoffs summarized in Supplementary Table 12) show significant difference in various tumor microenvironmental factors.

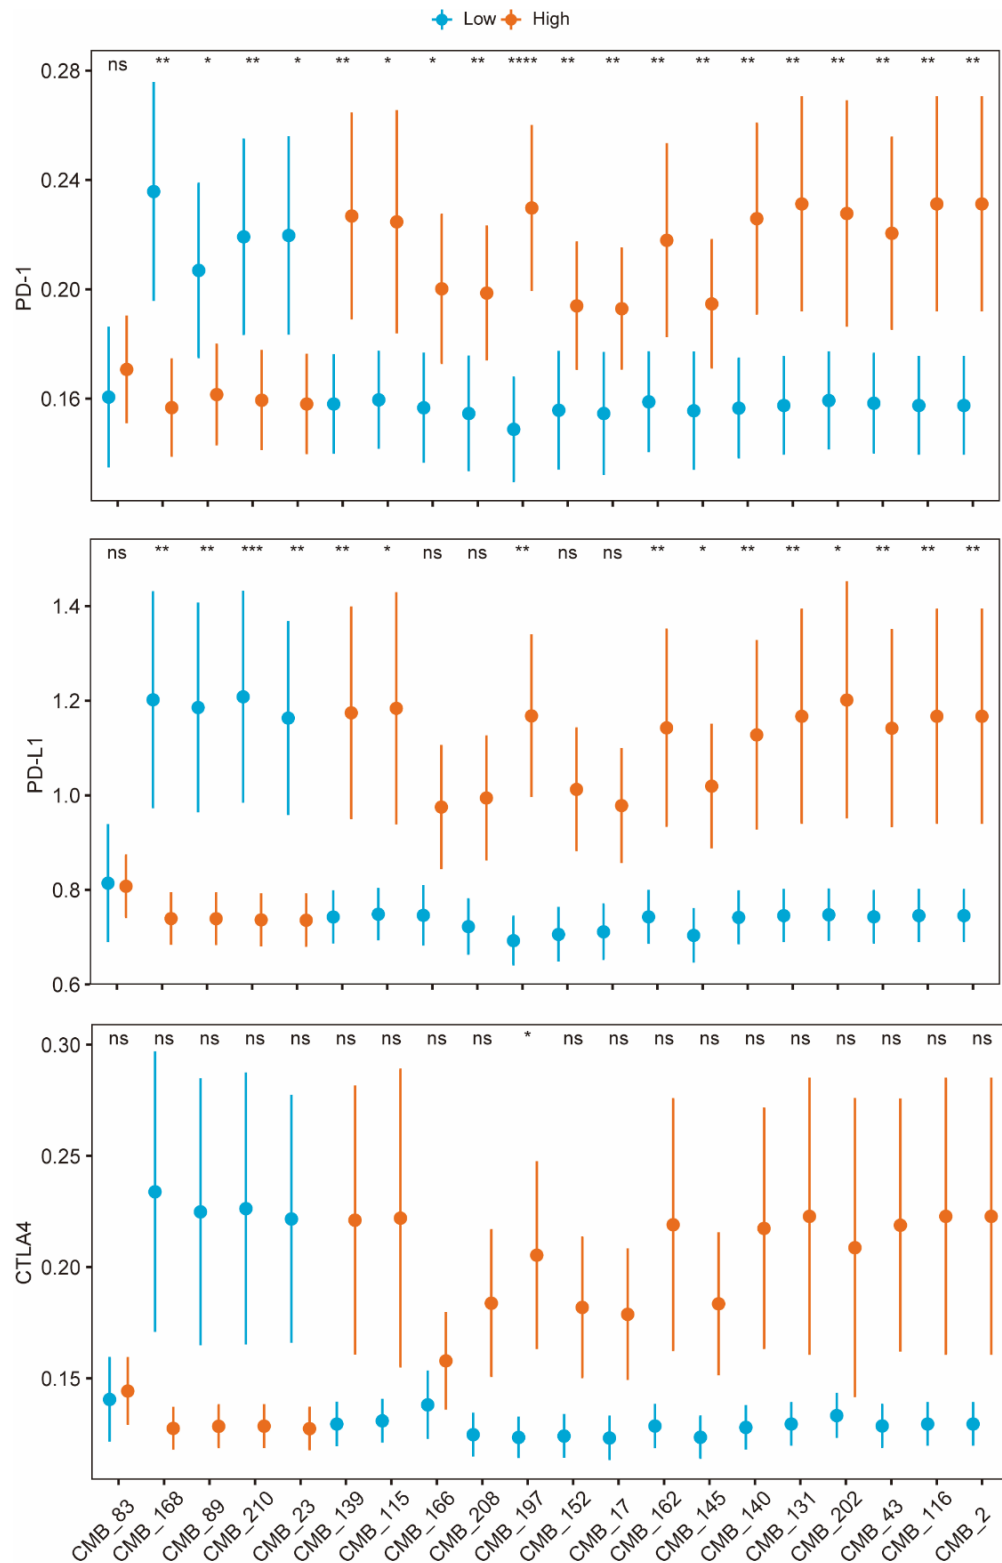

**Extended Data Figure 6.** TCGA-LGG patients within high and low cellular morphometric biomarker groups (cutoffs summarized in Supplementary Table 12) show significant difference with important biomarkers for immunotherapy.

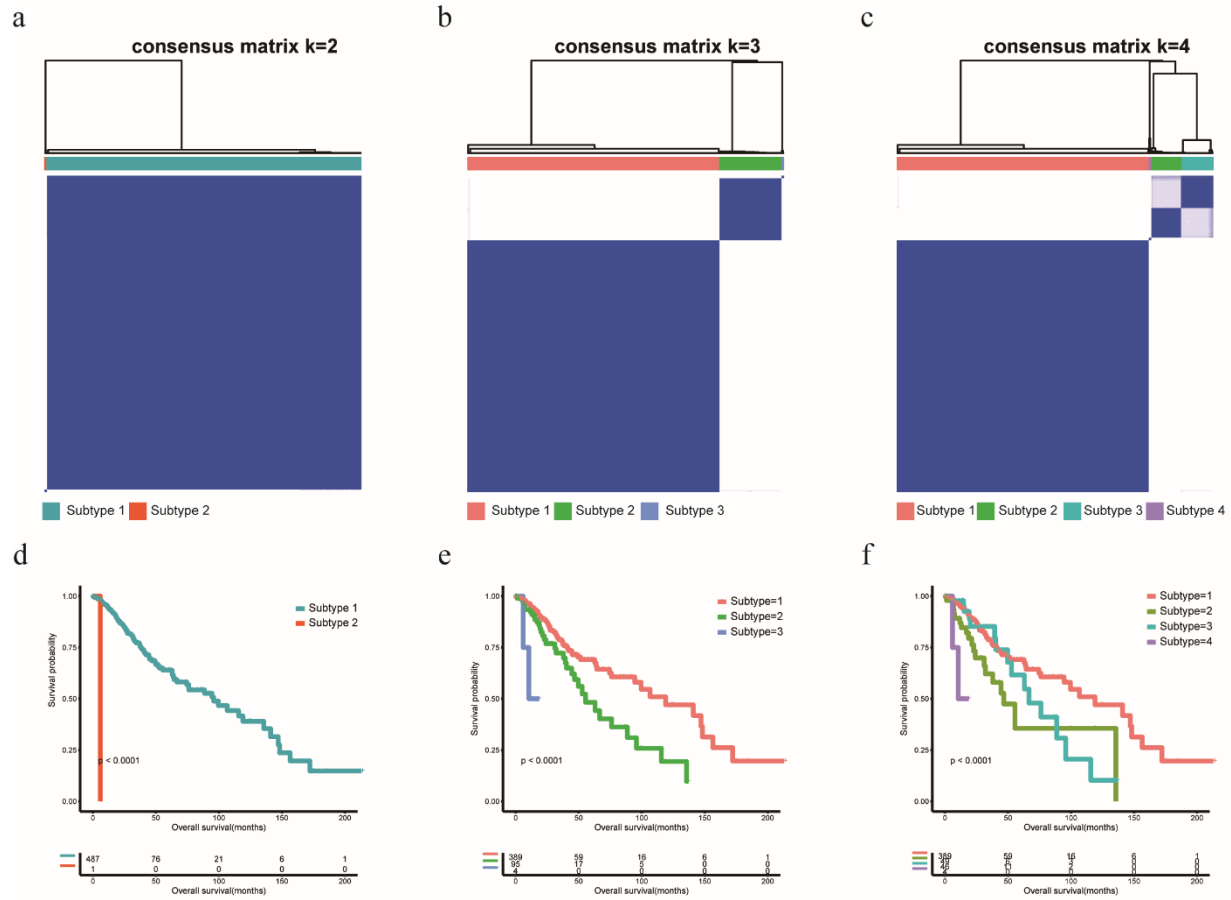

**Extended Data Figure 7. Subtyping model construction with consensus clustering in TCGA-LGG cohort. a, d.** consensus matrix and the corresponding Kaplan–Meier curves with two clusters. **b, e.** consensus matrix and the corresponding Kaplan–Meier curves with three clusters. **c, f.** consensus matrix and the corresponding Kaplan–Meier curves with four clusters.

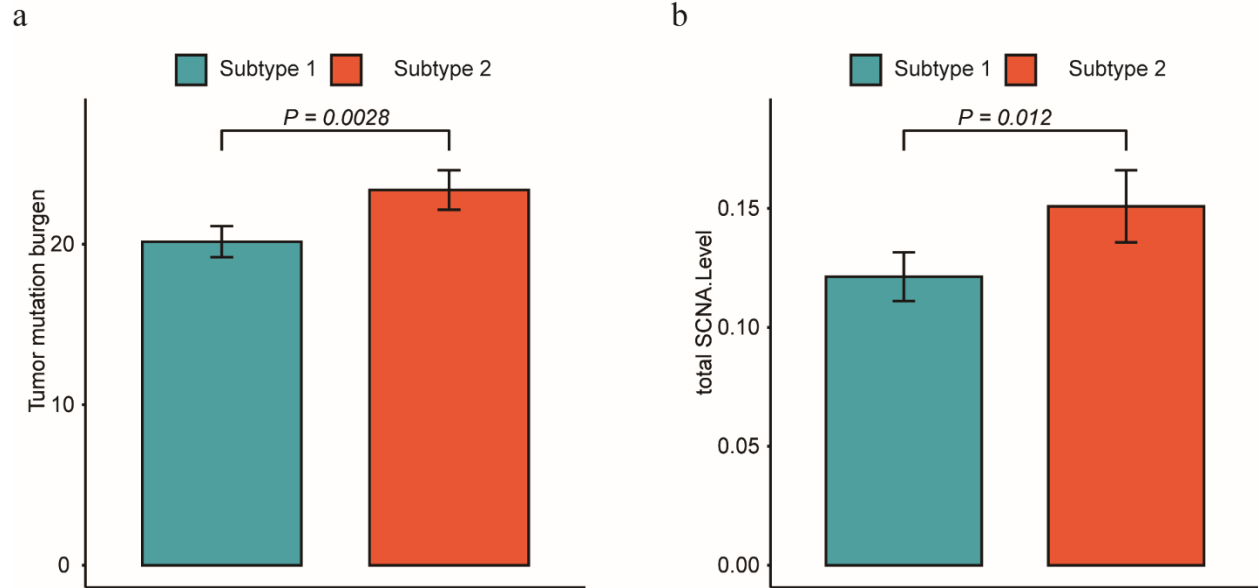

**Extended Data Figure 8.** Patient subtypes in TCGA-LGG cohort show **a.** significant difference in tumor mutation burden; and **b.** somatic copy number alteration (SCNA).



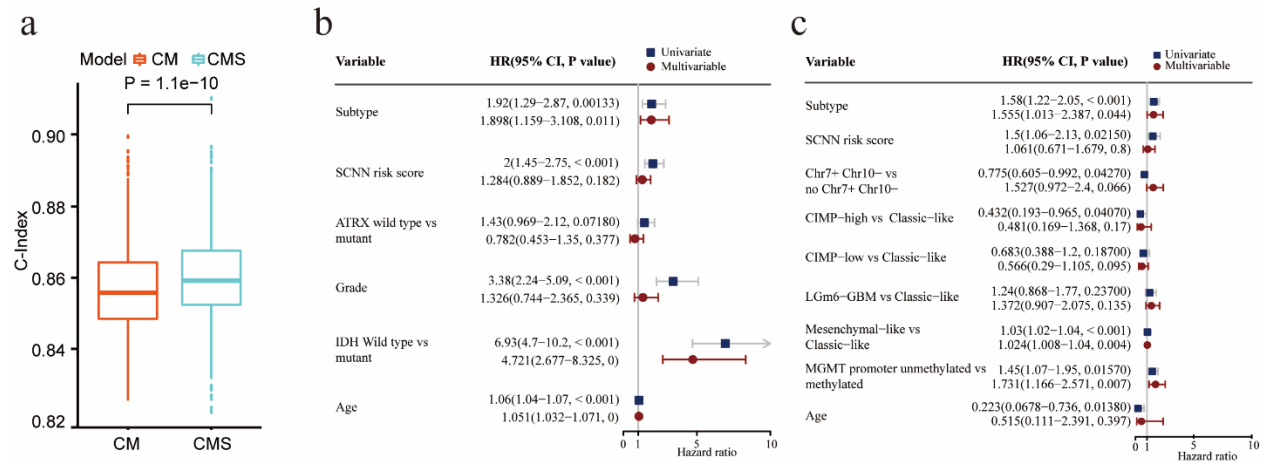

**Extended Data Figure 9.** The combination of cellular morphometric subtypes with important clinical and molecular factors (CMS) provides significantly improved predictive power of OS than classical model (CM) with clinical and molecular factors only (**a**). And univariate and multivariate CoxPH analysis in TCGA-LGG (**c**) and TCGA-GBM (**d**) cohorts with SCNN score, cellular morphometric subtype (Subtype) and other important clinical/molecular factors.

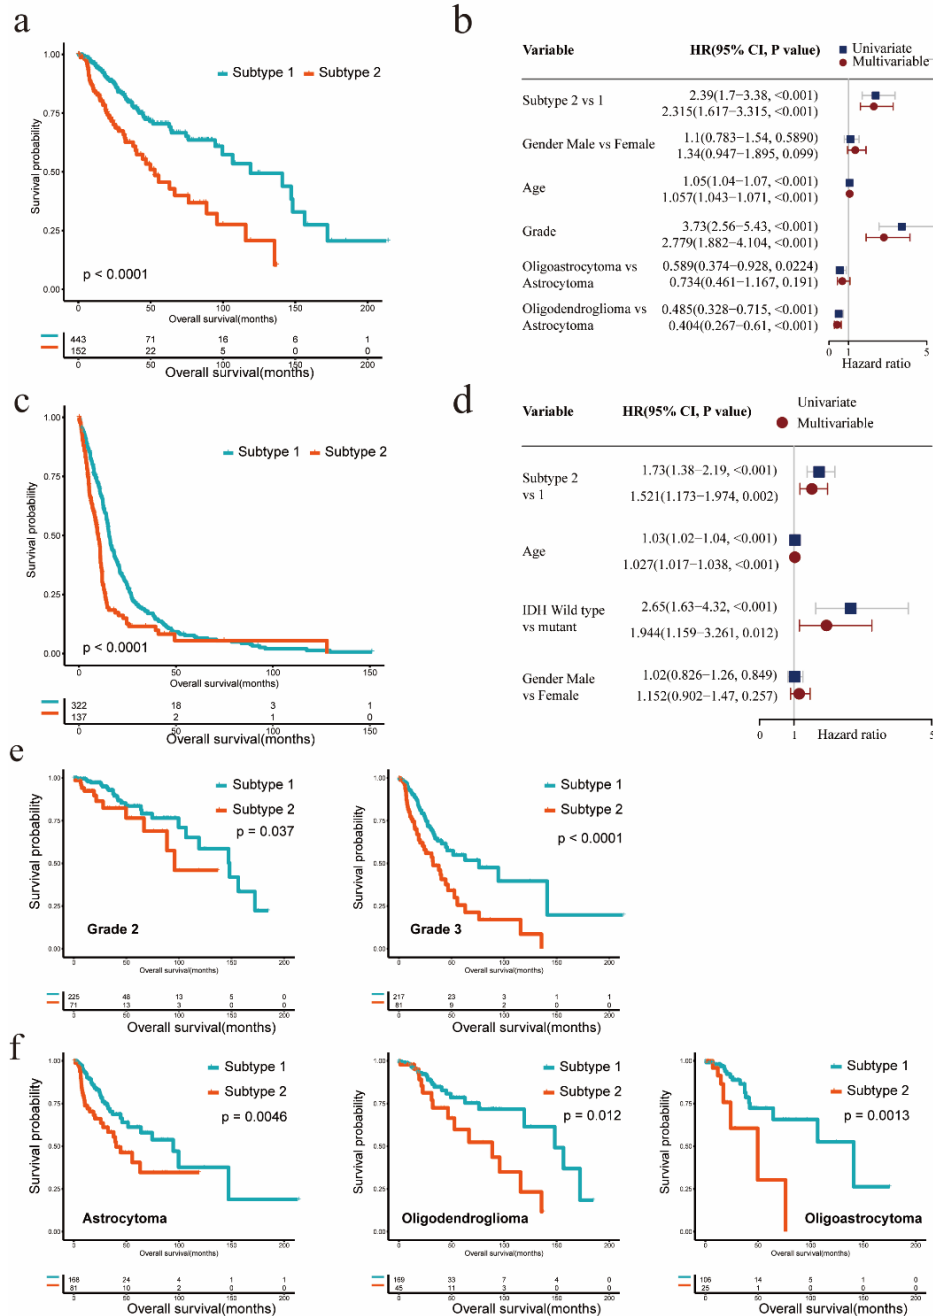

**Extended Data Figure 10.** Analysis on Pooled-LGG cohort, combining TCGA-LGG, ZN-LGG, and SU-LGG patients, confirms the consistency of CMS in terms of the significant difference in OS of all LGG patients (**a**), as well as its significant and independent prognostic value (**b**); analysis on Pooled-GBM cohort, combining TCGA-GBM, and ZN-GBM patients, confirms the consistency of our findings in terms of the significant difference in OS of all GBM patients (**c**), as well as the significant and independent prognostic value of CMS in Pooled-GBM cohort (**d**). The significant difference in OS between CMSs in Pooled-LGG cohort is independent from Grades (**e**), and histology types (**f**). Note, during pooled analysis, only factors available in all cohorts are included.
