# Supplementary material for: Clinical Significance and Molecular Annotation of Cellular Morphometric Subtypes in Lower Grade Gliomas discovered by Machine Learning: a retrospective multicentric study
Source: Research Square preprint supplement (doi:10.21203/rs.3.rs-770415/v1), 2021-08-12
Supplement: Supplementary file 2 [file 090621e7178c62e9cd4285b2.xlsx]

## Sheet: Sheet1
Supplementary Table 23. Gene ontology (GO) functional enrichment analysis of the differentially expressed genes (DEGs) for molecular function.
ID	Description	GeneRatio	BgRatio	pvalue	p.adjust	qvalue	geneID	Count
GO:0005200	structural constituent of cytoskeleton	11/248	102/17697	1.90074e-07	0.000107772	9.02351e-05	DES/KRT14/KRT15/KRT16/KRT17/KRT31/KRT5/KRT6B/KRT84/NEFL/NEFM	11
GO:0001228	DNA-binding transcription activator activity, RNA polymerase II-specific	17/248	439/17697	0.00016115	0.045686	0.0382519	ALX4/ATOH1/BARX1/CREB3L3/HNF4A/HNF1A/HOXB3/MAFA/NEUROD2/NEUROD6/NPAS4/ONECUT3/PHOX2B/SIX3/SOHLH1/TBR1/TBX1	17
GO:0005125	cytokine activity	11/248	220/17697	0.000284809	0.0538289	0.0450698	CCL18/CCL24/CD70/CSF3/CXCL1/CXCL6/IL22/IL26/IL6/TNFSF18/THPO	11
GO:0070653	high-density lipoprotein particle receptor binding	2/248	3/17697	0.000581368	0.0725985	0.0607851	APOA2/APOC3	2
GO:0070405	ammonium ion binding	6/248	75/17697	0.000640198	0.0725985	0.0607851	APOA2/CRP/DRD3/IGHM/SERPINA5/SLC6A3	6
GO:0048018	receptor ligand activity	16/248	482/17697	0.00131321	0.124098	0.103905	CCK/CCL18/CCL24/CD70/CRH/CSF3/CXCL1/CXCL6/FGF7/IL22/IL26/IL6/NTF3/NTS/TNFSF18/THPO	16
GO:0030246	carbohydrate binding	11/248	271/17697	0.00159055	0.128834	0.10787	CHI3L1/CLEC4M/GALNT5/ITLN1/KRT1/LGALS13/LGALS7B/KLRG1/PRG4/SELE/SFTPA1	11
GO:0004867	serine-type endopeptidase inhibitor activity	6/248	94/17697	0.00207711	0.134883	0.112935	AMBP/CPAMD8/SERPINA5/SERPINB5/TFPI2/WFIKKN2	6
GO:0005201	extracellular matrix structural constituent	8/248	163/17697	0.002141	0.134883	0.112935	CHI3L1/COL2A1/FGB/FGG/MXRA5/POSTN/PRG4/TFPI2	8
GO:0004866	endopeptidase inhibitor activity	8/248	175/17697	0.00331747	0.173851	0.145562	AMBP/CPAMD8/KNG1/LCN1/SERPINA5/SERPINB5/TFPI2/WFIKKN2	8
GO:0042289	MHC class II protein binding	2/248	7/17697	0.00392121	0.173851	0.145562	COL2A1/KRT17	2
GO:0030414	peptidase inhibitor activity	8/248	182/17697	0.00420516	0.173851	0.145562	AMBP/CPAMD8/KNG1/LCN1/SERPINA5/SERPINB5/TFPI2/WFIKKN2	8
GO:0061135	endopeptidase regulator activity	8/248	182/17697	0.00420516	0.173851	0.145562	AMBP/CPAMD8/KNG1/LCN1/SERPINA5/SERPINB5/TFPI2/WFIKKN2	8
GO:0008009	chemokine activity	4/248	49/17697	0.00486584	0.173851	0.145562	CCL18/CCL24/CXCL1/CXCL6	4
GO:0005328	neurotransmitter:sodium symporter activity	3/248	26/17697	0.00557091	0.173851	0.145562	SLC6A18/SLC6A3/SLC6A7	3
GO:0070325	lipoprotein particle receptor binding	3/248	26/17697	0.00557091	0.173851	0.145562	APOA2/APOC3/CRP	3
GO:0005326	neurotransmitter transporter activity	4/248	51/17697	0.00561569	0.173851	0.145562	SLC18A3/SLC6A18/SLC6A3/SLC6A7	4
GO:0031210	phosphatidylcholine binding	3/248	27/17697	0.0062032	0.173851	0.145562	APOA2/IGHM/SERPINA5	3
GO:0050997	quaternary ammonium group binding	3/248	27/17697	0.0062032	0.173851	0.145562	APOA2/IGHM/SERPINA5	3
GO:0001102	RNA polymerase II activating transcription factor binding	4/248	53/17697	0.00643894	0.173851	0.145562	HNF4A/PITX2/TBR1/TBX1	4
GO:0005544	calcium-dependent phospholipid binding	4/248	53/17697	0.00643894	0.173851	0.145562	ANXA8L1/ANXA8/CPNE7/PLA2G4F	4
GO:0005184	neuropeptide hormone activity	3/248	28/17697	0.0068766	0.175598	0.147025	CCK/CRH/NTS	3
GO:0005126	cytokine receptor binding	10/248	286/17697	0.00726378	0.175598	0.147025	CCL18/CCL24/CD70/CSF3/CXCL1/CXCL6/IL22/IL6/NTF3/TNFSF18	10
GO:0004252	serine-type endopeptidase activity	7/248	160/17697	0.00743274	0.175598	0.147025	LPAL2/KLK2/KLK3/KLKB1/KLK4/PRTN3/TMPRSS7	7
GO:0002020	protease binding	6/248	128/17697	0.00935614	0.183495	0.153637	RIPK2/CD70/LCN2/SEMG2/SERPINA5/SLC6A3	6
GO:0061134	peptidase regulator activity	8/248	219/17697	0.0122634	0.183495	0.153637	AMBP/CPAMD8/KNG1/LCN1/SERPINA5/SERPINB5/TFPI2/WFIKKN2	8
GO:0005501	retinoid binding	3/248	35/17697	0.0127882	0.183495	0.153637	CYP26A1/RHO/SERPINA5	3
GO:0042379	chemokine receptor binding	4/248	66/17697	0.013769	0.183495	0.153637	CCL18/CCL24/CXCL1/CXCL6	4
GO:0017070	U6 snRNA binding	2/248	13/17697	0.0137797	0.183495	0.153637	RNU4-1/RNU4-2	2
GO:0035240	dopamine binding	2/248	13/17697	0.0137797	0.183495	0.153637	DRD3/SLC6A3	2
GO:0019840	isoprenoid binding	3/248	36/17697	0.0138091	0.183495	0.153637	CYP26A1/RHO/SERPINA5	3
GO:0004102	choline O-acetyltransferase activity	1/248	1/17697	0.0140137	0.183495	0.153637	CHAT	1
GO:0004760	serine-pyruvate transaminase activity	1/248	1/17697	0.0140137	0.183495	0.153637	AGXT	1
GO:0005008	hepatocyte growth factor-activated receptor activity	1/248	1/17697	0.0140137	0.183495	0.153637	MET	1
GO:0005130	granulocyte colony-stimulating factor receptor binding	1/248	1/17697	0.0140137	0.183495	0.153637	CSF3	1
GO:0008554	sodium-exporting ATPase activity, phosphorylative mechanism	1/248	1/17697	0.0140137	0.183495	0.153637	ABCB11	1
GO:0015126	canalicular bile acid transmembrane transporter activity	1/248	1/17697	0.0140137	0.183495	0.153637	ABCB11	1
GO:0016151	nickel cation binding	1/248	1/17697	0.0140137	0.183495	0.153637	CA3	1
GO:0042131	thiamine phosphate phosphatase activity	1/248	1/17697	0.0140137	0.183495	0.153637	ACPP	1
GO:0045485	omega-6 fatty acid desaturase activity	1/248	1/17697	0.0140137	0.183495	0.153637	FADS1	1
GO:0046904	calcium oxalate binding	1/248	1/17697	0.0140137	0.183495	0.153637	AMBP	1
GO:0047704	bile-salt sulfotransferase activity	1/248	1/17697	0.0140137	0.183495	0.153637	SULT2A1	1
GO:0015294	solute:cation symporter activity	5/248	102/17697	0.014398	0.183495	0.153637	SLC15A1/SLC34A2/SLC6A18/SLC6A3/SLC6A7	5
GO:0008236	serine-type peptidase activity	7/248	182/17697	0.0144124	0.183495	0.153637	LPAL2/KLK2/KLK3/KLKB1/KLK4/PRTN3/TMPRSS7	7
GO:0017147	Wnt-protein binding	3/248	37/17697	0.014875	0.183495	0.153637	MET/SFRP5/WIF1	3
GO:0017171	serine hydrolase activity	7/248	186/17697	0.0160615	0.183495	0.153637	LPAL2/KLK2/KLK3/KLKB1/KLK4/PRTN3/TMPRSS7	7
GO:0005543	phospholipid binding	12/248	427/17697	0.0176473	0.183495	0.153637	ALOX15/ANXA8L1/ANXA8/APOA2/APOC3/CPNE7/IGHM/LPAR3/NRGN/PLA2G4F/PLCZ1/SERPINA5	12
GO:0004089	carbonate dehydratase activity	2/248	15/17697	0.0182118	0.183495	0.153637	CA3/CA4	2
GO:0070492	oligosaccharide binding	2/248	15/17697	0.0182118	0.183495	0.153637	ITLN1/SELE	2
GO:0015370	solute:sodium symporter activity	4/248	72/17697	0.0184252	0.183495	0.153637	SLC34A2/SLC6A18/SLC6A3/SLC6A7	4
GO:0015347	sodium-independent organic anion transmembrane transporter activity	2/248	16/17697	0.0206234	0.183495	0.153637	SLC22A9/SLCO1B1	2
GO:0030280	structural constituent of epidermis	2/248	16/17697	0.0206234	0.183495	0.153637	KRT1/KRT84	2
GO:0043274	phospholipase binding	2/248	16/17697	0.0206234	0.183495	0.153637	NEFL/SELE	2
GO:0005001	transmembrane receptor protein tyrosine phosphatase activity	2/248	17/17697	0.0231601	0.183495	0.153637	PTPRB/PTPRR	2
GO:0015125	bile acid transmembrane transporter activity	2/248	17/17697	0.0231601	0.183495	0.153637	ABCB11/SLCO1B1	2
GO:0019198	transmembrane receptor protein phosphatase activity	2/248	17/17697	0.0231601	0.183495	0.153637	PTPRB/PTPRR	2
GO:0055102	lipase inhibitor activity	2/248	17/17697	0.0231601	0.183495	0.153637	APOA2/APOC3	2
GO:1901618	organic hydroxy compound transmembrane transporter activity	3/248	44/17697	0.0236118	0.183495	0.153637	ABCB11/SLC6A3/SLCO1B1	3
GO:0008083	growth factor activity	6/248	163/17697	0.0274803	0.183495	0.153637	CSF3/CXCL1/FGF7/IL6/NTF3/THPO	6
GO:0000248	C-5 sterol desaturase activity	1/248	2/17697	0.0278317	0.183495	0.153637	FADS1	1
GO:0004447	iodide peroxidase activity	1/248	2/17697	0.0278317	0.183495	0.153637	TPO	1
GO:0004482	mRNA (guanine-N7-)-methyltransferase activity	1/248	2/17697	0.0278317	0.183495	0.153637	RNMT	1
GO:0004666	prostaglandin-endoperoxide synthase activity	1/248	2/17697	0.0278317	0.183495	0.153637	PTGS2	1
GO:0004914	interleukin-5 receptor activity	1/248	2/17697	0.0278317	0.183495	0.153637	IL5RA	1
GO:0005277	acetylcholine transmembrane transporter activity	1/248	2/17697	0.0278317	0.183495	0.153637	SLC18A3	1
GO:0005298	proline:sodium symporter activity	1/248	2/17697	0.0278317	0.183495	0.153637	SLC6A7	1
GO:0005427	proton-dependent oligopeptide secondary active transmembrane transporter activity	1/248	2/17697	0.0278317	0.183495	0.153637	SLC15A1	1
GO:0008453	alanine-glyoxylate transaminase activity	1/248	2/17697	0.0278317	0.183495	0.153637	AGXT	1
GO:0015322	secondary active oligopeptide transmembrane transporter activity	1/248	2/17697	0.0278317	0.183495	0.153637	SLC15A1	1
GO:0015432	bile acid-exporting ATPase activity	1/248	2/17697	0.0278317	0.183495	0.153637	ABCB11	1
GO:0015636	short-chain fatty acid transmembrane transporter activity	1/248	2/17697	0.0278317	0.183495	0.153637	SLC22A9	1
GO:0017045	corticotropin-releasing hormone activity	1/248	2/17697	0.0278317	0.183495	0.153637	CRH	1
GO:0033283	organic acid-transporting ATPase activity	1/248	2/17697	0.0278317	0.183495	0.153637	ABCB11	1
GO:0033284	carboxylic acid-transporting ATPase activity	1/248	2/17697	0.0278317	0.183495	0.153637	ABCB11	1
GO:0033285	monocarboxylic acid-transporting ATPase activity	1/248	2/17697	0.0278317	0.183495	0.153637	ABCB11	1
GO:0045518	interleukin-22 receptor binding	1/248	2/17697	0.0278317	0.183495	0.153637	IL22	1
GO:0047787	delta4-3-oxosteroid 5beta-reductase activity	1/248	2/17697	0.0278317	0.183495	0.153637	AKR1D1	1
GO:0047977	hepoxilin-epoxide hydrolase activity	1/248	2/17697	0.0278317	0.183495	0.153637	ALOX15	1
GO:0050473	arachidonate 15-lipoxygenase activity	1/248	2/17697	0.0278317	0.183495	0.153637	ALOX15	1
GO:0051120	hepoxilin A3 synthase activity	1/248	2/17697	0.0278317	0.183495	0.153637	ALOX15	1
GO:0052642	lysophosphatidic acid phosphatase activity	1/248	2/17697	0.0278317	0.183495	0.153637	ACPP	1
GO:0070704	sterol desaturase activity	1/248	2/17697	0.0278317	0.183495	0.153637	FADS1	1
GO:0071916	dipeptide transmembrane transporter activity	1/248	2/17697	0.0278317	0.183495	0.153637	SLC15A1	1
GO:0097604	temperature-gated cation channel activity	1/248	2/17697	0.0278317	0.183495	0.153637	TRPA1	1
GO:1901375	acetate ester transmembrane transporter activity	1/248	2/17697	0.0278317	0.183495	0.153637	SLC18A3	1
GO:1903981	enterobactin binding	1/248	2/17697	0.0278317	0.183495	0.153637	LCN2	1
GO:0001972	retinoic acid binding	2/248	19/17697	0.0285926	0.184227	0.154249	CYP26A1/SERPINA5	2
GO:0004622	lysophospholipase activity	2/248	19/17697	0.0285926	0.184227	0.154249	LGALS13/PLA2G4F	2
GO:1901338	catecholamine binding	2/248	20/17697	0.0314808	0.198762	0.166419	DRD3/SLC6A3	2
GO:0033613	activating transcription factor binding	4/248	85/17697	0.0315495	0.198762	0.166419	HNF4A/PITX2/TBR1/TBX1	4
GO:0008201	heparin binding	6/248	169/17697	0.0320018	0.199396	0.16695	CXCL6/FGF7/KNG1/POSTN/SERPINA5/CCN4	6
GO:0008028	monocarboxylic acid transmembrane transporter activity	3/248	50/17697	0.0328842	0.200488	0.167864	ABCB11/SLC22A9/SLCO1B1	3
GO:0008188	neuropeptide receptor activity	3/248	50/17697	0.0328842	0.200488	0.167864	NPBWR2/PROKR2/SSTR3	3
GO:0015278	calcium-release channel activity	2/248	21/17697	0.0344788	0.205784	0.172298	MCOLN3/TRPA1	2
GO:0051428	peptide hormone receptor binding	2/248	21/17697	0.0344788	0.205784	0.172298	CCK/CRH	2
GO:0004601	peroxidase activity	3/248	52/17697	0.0363377	0.21462	0.179696	GSTA1/PTGS2/TPO	3
GO:0005319	lipid transporter activity	5/248	131/17697	0.0373024	0.218046	0.182565	ABCB11/APOA2/SFTPA1/SLC22A9/SLCO1B1	5
GO:0004175	endopeptidase activity	11/248	427/17697	0.0388425	0.218317	0.182792	ADAMTS16/LPAL2/CAPN6/ECEL1/KLK2/KLK3/KLKB1/KLK4/PRTN3/TMPRSS7/USP29	11
GO:0004857	enzyme inhibitor activity	10/248	375/17697	0.0391651	0.218317	0.182792	AMBP/APOA2/APOC3/CPAMD8/KNG1/LCN1/SERPINA5/SERPINB5/TFPI2/WFIKKN2	10
GO:0004052	arachidonate 12-lipoxygenase activity	1/248	3/17697	0.0414569	0.218317	0.182792	ALOX15	1
GO:0019862	IgA binding	1/248	3/17697	0.0414569	0.218317	0.182792	AMBP	1
GO:0030172	troponin C binding	1/248	3/17697	0.0414569	0.218317	0.182792	TNNT2	1
GO:0030369	ICAM-3 receptor activity	1/248	3/17697	0.0414569	0.218317	0.182792	CLEC4M	1
GO:0030899	calcium-dependent ATPase activity	1/248	3/17697	0.0414569	0.218317	0.182792	TNNT2	1
GO:0097603	temperature-gated ion channel activity	1/248	3/17697	0.0414569	0.218317	0.182792	TRPA1	1
GO:0099184	structural constituent of postsynaptic intermediate filament cytoskeleton	1/248	3/17697	0.0414569	0.218317	0.182792	NEFL	1
GO:0008509	anion transmembrane transporter activity	9/248	327/17697	0.0414707	0.218317	0.182792	ABCB11/CLCA1/GABRA6/SLC22A9/SLC34A2/SLC6A18/SLC6A3/SLC6A7/SLCO1B1	9
GO:0020037	heme binding	5/248	135/17697	0.0415843	0.218317	0.182792	AMBP/CYP26A1/NGB/PTGS2/TPO	5
GO:0005539	glycosaminoglycan binding	7/248	229/17697	0.0428746	0.221551	0.1855	CXCL6/FGF7/IGHM/KNG1/POSTN/SERPINA5/CCN4	7
GO:0016684	oxidoreductase activity, acting on peroxide as acceptor	3/248	56/17697	0.0437791	0.221551	0.1855	GSTA1/PTGS2/TPO	3
GO:0019865	immunoglobulin binding	2/248	24/17697	0.0440951	0.221551	0.1855	AMBP/UMOD	2
GO:0042923	neuropeptide binding	2/248	24/17697	0.0440951	0.221551	0.1855	NPBWR2/SSTR3	2
GO:0001664	G protein-coupled receptor binding	8/248	280/17697	0.044154	0.221551	0.1855	CCL18/CCL24/CRH/CXCL1/CXCL6/DRD3/MARCO/MYOC	8
GO:0015276	ligand-gated ion channel activity	5/248	138/17697	0.044983	0.221786	0.185696	GABRA6/HTR3B/MCOLN3/P2RX2/TRPA1	5
GO:0022834	ligand-gated channel activity	5/248	138/17697	0.044983	0.221786	0.185696	GABRA6/HTR3B/MCOLN3/P2RX2/TRPA1	5
GO:0015291	secondary active transmembrane transporter activity	7/248	237/17697	0.0499103	0.232267	0.194472	SLC15A1/SLC22A9/SLC34A2/SLC6A18/SLC6A3/SLC6A7/SLCO1B1	7
GO:0015293	symporter activity	5/248	144/17697	0.0522656	0.232267	0.194472	SLC15A1/SLC34A2/SLC6A18/SLC6A3/SLC6A7	5
GO:0022836	gated channel activity	9/248	343/17697	0.0531187	0.232267	0.194472	CALHM1/CLCA1/GABRA6/HTR3B/KCNS1/MCOLN3/P2RX2/TMC3/TRPA1	9
GO:0046906	tetrapyrrole binding	5/248	145/17697	0.0535425	0.232267	0.194472	AMBP/CYP26A1/NGB/PTGS2/TPO	5
GO:0016702	oxidoreductase activity, acting on single donors with incorporation of molecular oxygen, incorporation of two atoms of oxygen	2/248	27/17697	0.0545732	0.232267	0.194472	ALOX15/PTGS2	2
GO:0099604	ligand-gated calcium channel activity	2/248	27/17697	0.0545732	0.232267	0.194472	MCOLN3/TRPA1	2
GO:0008528	G protein-coupled peptide receptor activity	5/248	146/17697	0.0548374	0.232267	0.194472	MAS1/NPBWR2/PROKR2/RXFP1/SSTR3	5
GO:0001595	angiotensin receptor activity	1/248	4/17697	0.0548919	0.232267	0.194472	MAS1	1
GO:0004035	alkaline phosphatase activity	1/248	4/17697	0.0548919	0.232267	0.194472	ALPG	1
GO:0004769	steroid delta-isomerase activity	1/248	4/17697	0.0548919	0.232267	0.194472	GSTA1	1
GO:0004945	angiotensin type II receptor activity	1/248	4/17697	0.0548919	0.232267	0.194472	MAS1	1
GO:0005330	dopamine:sodium symporter activity	1/248	4/17697	0.0548919	0.232267	0.194472	SLC6A3	1
GO:0008502	melatonin receptor activity	1/248	4/17697	0.0548919	0.232267	0.194472	GPR50	1
GO:0031728	CCR3 chemokine receptor binding	1/248	4/17697	0.0548919	0.232267	0.194472	CCL24	1
GO:0033265	choline binding	1/248	4/17697	0.0548919	0.232267	0.194472	CRP	1
GO:0050294	steroid sulfotransferase activity	1/248	4/17697	0.0548919	0.232267	0.194472	SULT2A1	1
GO:0051430	corticotropin-releasing hormone receptor 1 binding	1/248	4/17697	0.0548919	0.232267	0.194472	CRH	1
GO:0051431	corticotropin-releasing hormone receptor 2 binding	1/248	4/17697	0.0548919	0.232267	0.194472	CRH	1
GO:0070915	lysophosphatidic acid receptor activity	1/248	4/17697	0.0548919	0.232267	0.194472	LPAR3	1
GO:0016701	oxidoreductase activity, acting on single donors with incorporation of molecular oxygen	2/248	28/17697	0.0582422	0.244617	0.204813	ALOX15/PTGS2	2
GO:0015081	sodium ion transmembrane transporter activity	5/248	149/17697	0.0588303	0.245271	0.20536	ABCB11/SLC34A2/SLC6A18/SLC6A3/SLC6A7	5
GO:0099094	ligand-gated cation channel activity	4/248	105/17697	0.0602374	0.24766	0.207361	HTR3B/MCOLN3/P2RX2/TRPA1	4
GO:0033293	monocarboxylic acid binding	3/248	64/17697	0.0607317	0.24766	0.207361	CYP26A1/HNF4A/SERPINA5	3
GO:0001653	peptide receptor activity	5/248	152/17697	0.0629854	0.24766	0.207361	MAS1/NPBWR2/PROKR2/RXFP1/SSTR3	5
GO:0005342	organic acid transmembrane transporter activity	5/248	153/17697	0.0644064	0.24766	0.207361	ABCB11/SLC22A9/SLC6A18/SLC6A7/SLCO1B1	5
GO:0046943	carboxylic acid transmembrane transporter activity	5/248	153/17697	0.0644064	0.24766	0.207361	ABCB11/SLC22A9/SLC6A18/SLC6A7/SLCO1B1	5
GO:0008519	ammonium transmembrane transporter activity	2/248	30/17697	0.0658259	0.24766	0.207361	SLC18A3/SLC6A3	2
GO:0004530	deoxyribonuclease I activity	1/248	5/17697	0.0681394	0.24766	0.207361	DNASE1L3	1
GO:0004994	somatostatin receptor activity	1/248	5/17697	0.0681394	0.24766	0.207361	SSTR3	1
GO:0005502	11-cis retinal binding	1/248	5/17697	0.0681394	0.24766	0.207361	RHO	1
GO:0008048	calcium sensitive guanylate cyclase activator activity	1/248	5/17697	0.0681394	0.24766	0.207361	GUCA1C	1
GO:0015321	sodium-dependent phosphate transmembrane transporter activity	1/248	5/17697	0.0681394	0.24766	0.207361	SLC34A2	1
GO:0015333	peptide:proton symporter activity	1/248	5/17697	0.0681394	0.24766	0.207361	SLC15A1	1
GO:0016717	oxidoreductase activity, acting on paired donors, with oxidation of a pair of donors resulting in the reduction of molecular oxygen to two molecules of water	1/248	5/17697	0.0681394	0.24766	0.207361	FADS1	1
GO:0022850	serotonin-gated cation-selective channel activity	1/248	5/17697	0.0681394	0.24766	0.207361	HTR3B	1
GO:0031013	troponin I binding	1/248	5/17697	0.0681394	0.24766	0.207361	TNNT2	1
GO:0032190	acrosin binding	1/248	5/17697	0.0681394	0.24766	0.207361	SERPINA5	1
GO:0034040	lipid-transporting ATPase activity	1/248	5/17697	0.0681394	0.24766	0.207361	ABCB11	1
GO:0035671	enone reductase activity	1/248	5/17697	0.0681394	0.24766	0.207361	AKR1D1	1
GO:0072345	NAADP-sensitive calcium-release channel activity	1/248	5/17697	0.0681394	0.24766	0.207361	MCOLN3	1
GO:0086083	cell adhesive protein binding involved in bundle of His cell-Purkinje myocyte communication	1/248	5/17697	0.0681394	0.24766	0.207361	DSG2	1
GO:0022804	active transmembrane transporter activity	9/248	362/17697	0.0695034	0.25025	0.209529	ABCB11/ABCC12/SLC15A1/SLC22A9/SLC34A2/SLC6A18/SLC6A3/SLC6A7/SLCO1B1	9
GO:0015175	neutral amino acid transmembrane transporter activity	2/248	31/17697	0.0697346	0.25025	0.209529	SLC6A18/SLC6A7	2
GO:0005217	intracellular ligand-gated ion channel activity	2/248	33/17697	0.0777713	0.27389	0.229322	MCOLN3/TRPA1	2
GO:0071813	lipoprotein particle binding	2/248	33/17697	0.0777713	0.27389	0.229322	APOA2/CRP	2
GO:0071814	protein-lipid complex binding	2/248	33/17697	0.0777713	0.27389	0.229322	APOA2/CRP	2
GO:0010853	cyclase activator activity	1/248	6/17697	0.0812018	0.274056	0.229461	GUCA1C	1
GO:0030250	guanylate cyclase activator activity	1/248	6/17697	0.0812018	0.274056	0.229461	GUCA1C	1
GO:0034190	apolipoprotein receptor binding	1/248	6/17697	0.0812018	0.274056	0.229461	APOA2	1
GO:0047086	ketosteroid monooxygenase activity	1/248	6/17697	0.0812018	0.274056	0.229461	AKR1D1	1
GO:0051429	corticotropin-releasing hormone receptor binding	1/248	6/17697	0.0812018	0.274056	0.229461	CRH	1
GO:0060228	phosphatidylcholine-sterol O-acyltransferase activator activity	1/248	6/17697	0.0812018	0.274056	0.229461	APOA2	1
GO:1990254	keratin filament binding	1/248	6/17697	0.0812018	0.274056	0.229461	KRT14	1
GO:0030594	neurotransmitter receptor activity	4/248	117/17697	0.0823456	0.276272	0.231316	DRD3/GABRA6/HTR3B/OR6T1	4
GO:0016791	phosphatase activity	7/248	270/17697	0.0863424	0.287977	0.241117	ACPP/ALPG/CA3/PLPPR2/PTPRB/PTPRR/PTPRQ	7
GO:0005230	extracellular ligand-gated ion channel activity	3/248	75/17697	0.088228	0.290844	0.243518	GABRA6/HTR3B/P2RX2	3
GO:0005546	phosphatidylinositol-4,5-bisphosphate binding	3/248	75/17697	0.088228	0.290844	0.243518	ALOX15/ANXA8/PLCZ1	3
GO:0019825	oxygen binding	2/248	36/17697	0.0903333	0.2915	0.244066	CYP26A1/NGB	2
GO:0034987	immunoglobulin receptor binding	3/248	76/17697	0.0909492	0.2915	0.244066	IGHG4/IGHM/IGHV4-31	3
GO:0005179	hormone activity	4/248	122/17697	0.0925857	0.2915	0.244066	CCK/CRH/NTS/THPO	4
GO:0004931	extracellularly ATP-gated cation channel activity	1/248	7/17697	0.0940819	0.2915	0.244066	P2RX2	1
GO:0005138	interleukin-6 receptor binding	1/248	7/17697	0.0940819	0.2915	0.244066	IL6	1
GO:0015193	L-proline transmembrane transporter activity	1/248	7/17697	0.0940819	0.2915	0.244066	SLC6A7	1
GO:0015245	fatty acid transmembrane transporter activity	1/248	7/17697	0.0940819	0.2915	0.244066	SLC22A9	1
GO:0030249	guanylate cyclase regulator activity	1/248	7/17697	0.0940819	0.2915	0.244066	GUCA1C	1
GO:0030274	LIM domain binding	1/248	7/17697	0.0940819	0.2915	0.244066	RIPK2	1
GO:0032027	myosin light chain binding	1/248	7/17697	0.0940819	0.2915	0.244066	MYOC	1
GO:0035673	oligopeptide transmembrane transporter activity	1/248	7/17697	0.0940819	0.2915	0.244066	SLC15A1	1
GO:0022839	ion gated channel activity	8/248	334/17697	0.0987088	0.303468	0.254087	CALHM1/CLCA1/GABRA6/HTR3B/KCNS1/MCOLN3/P2RX2/TRPA1	8
GO:0042056	chemoattractant activity	2/248	38/17697	0.0990152	0.303468	0.254087	FGF7/NTF3	2
GO:0016298	lipase activity	4/248	127/17697	0.103401	0.307338	0.257327	LGALS13/LIPF/PLA2G4F/PLCZ1	4
GO:0005547	phosphatidylinositol-3,4,5-trisphosphate binding	2/248	39/17697	0.103441	0.307338	0.257327	ANXA8/NRGN	2
GO:0016709	oxidoreductase activity, acting on paired donors, with incorporation or reduction of molecular oxygen, NAD(P)H as one donor, and incorporation of one atom of oxygen	2/248	39/17697	0.103441	0.307338	0.257327	AKR1D1/CYP26A1	2
GO:0001591	dopamine neurotransmitter receptor activity, coupled via Gi/Go	1/248	8/17697	0.106782	0.307338	0.257327	DRD3	1
GO:0001849	complement component C1q binding	1/248	8/17697	0.106782	0.307338	0.257327	CRP	1
GO:0004706	JUN kinase kinase kinase activity	1/248	8/17697	0.106782	0.307338	0.257327	RIPK2	1
GO:0008061	chitin binding	1/248	8/17697	0.106782	0.307338	0.257327	CHI3L1	1
GO:0008504	monoamine transmembrane transporter activity	1/248	8/17697	0.106782	0.307338	0.257327	SLC6A3	1
GO:0016413	O-acetyltransferase activity	1/248	8/17697	0.106782	0.307338	0.257327	CHAT	1
GO:0016615	malate dehydrogenase activity	1/248	8/17697	0.106782	0.307338	0.257327	LIPF	1
GO:0031402	sodium ion binding	1/248	8/17697	0.106782	0.307338	0.257327	SLC34A2	1
GO:0035381	ATP-gated ion channel activity	1/248	8/17697	0.106782	0.307338	0.257327	P2RX2	1
GO:0042287	MHC protein binding	2/248	40/17697	0.107919	0.309042	0.258754	COL2A1/KRT17	2
GO:0003796	lysozyme activity	1/248	9/17697	0.119305	0.326792	0.273616	LYZL6	1
GO:0003810	protein-glutamine gamma-glutamyltransferase activity	1/248	9/17697	0.119305	0.326792	0.273616	TGM7	1
GO:0003993	acid phosphatase activity	1/248	9/17697	0.119305	0.326792	0.273616	ACPP	1
GO:0004985	opioid receptor activity	1/248	9/17697	0.119305	0.326792	0.273616	NPBWR2	1
GO:0005436	sodium:phosphate symporter activity	1/248	9/17697	0.119305	0.326792	0.273616	SLC34A2	1
GO:0008046	axon guidance receptor activity	1/248	9/17697	0.119305	0.326792	0.273616	GFRA3	1
GO:0008401	retinoic acid 4-hydroxylase activity	1/248	9/17697	0.119305	0.326792	0.273616	CYP26A1	1
GO:0010851	cyclase regulator activity	1/248	9/17697	0.119305	0.326792	0.273616	GUCA1C	1
GO:0031748	D1 dopamine receptor binding	1/248	9/17697	0.119305	0.326792	0.273616	DRD3	1
GO:0016209	antioxidant activity	3/248	86/17697	0.119979	0.327057	0.273838	GSTA1/PTGS2/TPO	3
GO:0048020	CCR chemokine receptor binding	2/248	43/17697	0.121652	0.330031	0.276328	CCL18/CCL24	2
GO:0004952	dopamine neurotransmitter receptor activity	1/248	10/17697	0.131653	0.342433	0.286712	DRD3	1
GO:0004983	neuropeptide Y receptor activity	1/248	10/17697	0.131653	0.342433	0.286712	PROKR2	1
GO:0005165	neurotrophin receptor binding	1/248	10/17697	0.131653	0.342433	0.286712	NTF3	1
GO:0015378	sodium:chloride symporter activity	1/248	10/17697	0.131653	0.342433	0.286712	SLC6A3	1
GO:0016803	ether hydrolase activity	1/248	10/17697	0.131653	0.342433	0.286712	ALOX15	1
GO:0032395	MHC class II receptor activity	1/248	10/17697	0.131653	0.342433	0.286712	KRT17	1
GO:0046790	virion binding	1/248	10/17697	0.131653	0.342433	0.286712	CLEC4M	1
GO:0070513	death domain binding	1/248	10/17697	0.131653	0.342433	0.286712	DAPL1	1
GO:0005216	ion channel activity	9/248	416/17697	0.131659	0.342433	0.286712	CALHM1/CLCA1/GABRA6/HTR3B/KCNS1/MCOLN3/P2RX2/TMC3/TRPA1	9
GO:0031406	carboxylic acid binding	5/248	193/17697	0.13534	0.347025	0.290557	AGXT/CYP26A1/HNF4A/SELE/SERPINA5	5
GO:0008307	structural constituent of muscle	2/248	46/17697	0.135781	0.347025	0.290557	CSRP1/MYH11	2
GO:0032813	tumor necrosis factor receptor superfamily binding	2/248	46/17697	0.135781	0.347025	0.290557	CD70/TNFSF18	2
GO:0015238	drug transmembrane transporter activity	3/248	92/17697	0.13883	0.347025	0.290557	SLC18A3/SLC6A3/SLC6A7	3
GO:1901681	sulfur compound binding	6/248	250/17697	0.140008	0.347025	0.290557	CXCL6/FGF7/KNG1/POSTN/SERPINA5/CCN4	6
GO:0017069	snRNA binding	2/248	47/17697	0.14057	0.347025	0.290557	RNU4-1/RNU4-2	2
GO:0008174	mRNA methyltransferase activity	1/248	11/17697	0.143829	0.347025	0.290557	RNMT	1
GO:0008503	benzodiazepine receptor activity	1/248	11/17697	0.143829	0.347025	0.290557	GABRA6	1
GO:0015114	phosphate ion transmembrane transporter activity	1/248	11/17697	0.143829	0.347025	0.290557	SLC34A2	1
GO:0016801	hydrolase activity, acting on ether bonds	1/248	11/17697	0.143829	0.347025	0.290557	ALOX15	1
GO:0019855	calcium channel inhibitor activity	1/248	11/17697	0.143829	0.347025	0.290557	AMBP	1
GO:0019864	IgG binding	1/248	11/17697	0.143829	0.347025	0.290557	UMOD	1
GO:0042577	lipid phosphatase activity	1/248	11/17697	0.143829	0.347025	0.290557	PLPPR2	1
GO:0048407	platelet-derived growth factor binding	1/248	11/17697	0.143829	0.347025	0.290557	COL2A1	1
GO:0050786	RAGE receptor binding	1/248	11/17697	0.143829	0.347025	0.290557	S100A7	1
GO:0089720	caspase binding	1/248	11/17697	0.143829	0.347025	0.290557	RIPK2	1
GO:0099186	structural constituent of postsynapse	1/248	11/17697	0.143829	0.347025	0.290557	NEFL	1
GO:0042578	phosphoric ester hydrolase activity	8/248	367/17697	0.145109	0.34863	0.2919	ACPP/ALPG/CA3/PLCZ1/PLPPR2/PTPRB/PTPRR/PTPRQ	8
GO:0022838	substrate-specific channel activity	9/248	428/17697	0.148519	0.354041	0.296431	CALHM1/CLCA1/GABRA6/HTR3B/KCNS1/MCOLN3/P2RX2/TMC3/TRPA1	9
GO:0005496	steroid binding	3/248	95/17697	0.14861	0.354041	0.296431	AKR1D1/APOA2/APOC3	3
GO:0015103	inorganic anion transmembrane transporter activity	4/248	146/17697	0.149278	0.354145	0.296518	CLCA1/GABRA6/SLC34A2/SLC6A3	4
GO:0015485	cholesterol binding	2/248	49/17697	0.150252	0.35497	0.297209	APOA2/APOC3	2
GO:0017154	semaphorin receptor activity	1/248	12/17697	0.155834	0.363614	0.304446	MET	1
GO:0033691	sialic acid binding	1/248	12/17697	0.155834	0.363614	0.304446	SELE	1
GO:0042301	phosphate ion binding	1/248	12/17697	0.155834	0.363614	0.304446	SLC34A2	1
GO:0005044	scavenger receptor activity	2/248	51/17697	0.160063	0.371368	0.310938	MARCO/PRG4	2
GO:0043177	organic acid binding	5/248	205/17697	0.16148	0.371368	0.310938	AGXT/CYP26A1/HNF4A/SELE/SERPINA5	5
GO:0046873	metal ion transmembrane transporter activity	9/248	438/17697	0.163357	0.371368	0.310938	ABCB11/CALHM1/KCNS1/MCOLN3/SLC34A2/SLC6A18/SLC6A3/SLC6A7/TRPA1	9
GO:0004725	protein tyrosine phosphatase activity	3/248	100/17697	0.16538	0.371368	0.310938	PTPRB/PTPRR/PTPRQ	3
GO:0015108	chloride transmembrane transporter activity	3/248	100/17697	0.16538	0.371368	0.310938	CLCA1/GABRA6/SLC6A3	3
GO:0004032	alditol:NADP+ 1-oxidoreductase activity	1/248	13/17697	0.167672	0.371368	0.310938	AKR1D1	1
GO:0008195	phosphatidate phosphatase activity	1/248	13/17697	0.167672	0.371368	0.310938	PLPPR2	1
GO:0008253	5'-nucleotidase activity	1/248	13/17697	0.167672	0.371368	0.310938	ACPP	1
GO:0015373	anion:sodium symporter activity	1/248	13/17697	0.167672	0.371368	0.310938	SLC6A3	1
GO:0022851	GABA-gated chloride ion channel activity	1/248	13/17697	0.167672	0.371368	0.310938	GABRA6	1
GO:0031404	chloride ion binding	1/248	13/17697	0.167672	0.371368	0.310938	LCN1	1
GO:0061783	peptidoglycan muralytic activity	1/248	13/17697	0.167672	0.371368	0.310938	LYZL6	1
GO:0086080	protein binding involved in heterotypic cell-cell adhesion	1/248	13/17697	0.167672	0.371368	0.310938	DSG2	1
GO:0004620	phospholipase activity	3/248	102/17697	0.17224	0.380001	0.318166	LGALS13/PLA2G4F/PLCZ1	3
GO:0001085	RNA polymerase II transcription factor binding	4/248	155/17697	0.173324	0.380909	0.318927	HNF4A/PITX2/TBR1/TBX1	4
GO:0008514	organic anion transmembrane transporter activity	5/248	211/17697	0.175263	0.383683	0.32125	ABCB11/SLC22A9/SLC6A18/SLC6A7/SLCO1B1	5
GO:0005283	amino acid:sodium symporter activity	1/248	14/17697	0.179345	0.384729	0.322125	SLC6A7	1
GO:0005344	oxygen carrier activity	1/248	14/17697	0.179345	0.384729	0.322125	NGB	1
GO:0016863	intramolecular oxidoreductase activity, transposing C=C bonds	1/248	14/17697	0.179345	0.384729	0.322125	GSTA1	1
GO:0035497	cAMP response element binding	1/248	14/17697	0.179345	0.384729	0.322125	CREB3L3	1
GO:0045125	bioactive lipid receptor activity	1/248	14/17697	0.179345	0.384729	0.322125	LPAR3	1
GO:0016705	oxidoreductase activity, acting on paired donors, with incorporation or reduction of molecular oxygen	4/248	159/17697	0.184417	0.384729	0.322125	AKR1D1/CYP26A1/FADS1/PTGS2	4
GO:0003707	steroid hormone receptor activity	2/248	56/17697	0.185058	0.384729	0.322125	HNF4A/OR51E2	2
GO:0016836	hydro-lyase activity	2/248	56/17697	0.185058	0.384729	0.322125	CA3/CA4	2
GO:0032934	sterol binding	2/248	56/17697	0.185058	0.384729	0.322125	APOA2/APOC3	2
GO:0043621	protein self-association	2/248	56/17697	0.185058	0.384729	0.322125	AGXT/TMEM190	2
GO:0003823	antigen binding	4/248	160/17697	0.187226	0.384729	0.322125	CLEC4M/IGHG4/IGHM/IGHV4-31	4
GO:1901981	phosphatidylinositol phosphate binding	4/248	161/17697	0.19005	0.384729	0.322125	ALOX15/ANXA8/NRGN/PLCZ1	4
GO:0001222	transcription corepressor binding	1/248	15/17697	0.190854	0.384729	0.322125	SIX3	1
GO:0001846	opsonin binding	1/248	15/17697	0.190854	0.384729	0.322125	CRP	1
GO:0005523	tropomyosin binding	1/248	15/17697	0.190854	0.384729	0.322125	TNNT2	1
GO:0008020	G protein-coupled photoreceptor activity	1/248	15/17697	0.190854	0.384729	0.322125	RHO	1
GO:0008035	high-density lipoprotein particle binding	1/248	15/17697	0.190854	0.384729	0.322125	APOA2	1
GO:0008252	nucleotidase activity	1/248	15/17697	0.190854	0.384729	0.322125	ACPP	1
GO:0008381	mechanosensitive ion channel activity	1/248	15/17697	0.190854	0.384729	0.322125	TMC3	1
GO:0019215	intermediate filament binding	1/248	15/17697	0.190854	0.384729	0.322125	KRT14	1
GO:0015267	channel activity	9/248	456/17697	0.191757	0.384729	0.322125	CALHM1/CLCA1/GABRA6/HTR3B/KCNS1/MCOLN3/P2RX2/TMC3/TRPA1	9
GO:0022803	passive transmembrane transporter activity	9/248	457/17697	0.193395	0.384729	0.322125	CALHM1/CLCA1/GABRA6/HTR3B/KCNS1/MCOLN3/P2RX2/TMC3/TRPA1	9
GO:0004869	cysteine-type endopeptidase inhibitor activity	2/248	58/17697	0.195208	0.384729	0.322125	KNG1/LCN1	2
GO:0008227	G protein-coupled amine receptor activity	2/248	59/17697	0.200309	0.384729	0.322125	DRD3/OR6T1	2
GO:0097110	scaffold protein binding	2/248	59/17697	0.200309	0.384729	0.322125	KRT15/KRT5	2
GO:1902936	phosphatidylinositol bisphosphate binding	3/248	110/17697	0.200433	0.384729	0.322125	ALOX15/ANXA8/PLCZ1	3
GO:0005229	intracellular calcium activated chloride channel activity	1/248	16/17697	0.202203	0.384729	0.322125	CLCA1	1
GO:0005237	inhibitory extracellular ligand-gated ion channel activity	1/248	16/17697	0.202203	0.384729	0.322125	GABRA6	1
GO:0008191	metalloendopeptidase inhibitor activity	1/248	16/17697	0.202203	0.384729	0.322125	WFIKKN2	1
GO:0015377	cation:chloride symporter activity	1/248	16/17697	0.202203	0.384729	0.322125	SLC6A3	1
GO:0016888	endodeoxyribonuclease activity, producing 5'-phosphomonoesters	1/248	16/17697	0.202203	0.384729	0.322125	DNASE1L3	1
GO:0016918	retinal binding	1/248	16/17697	0.202203	0.384729	0.322125	RHO	1
GO:0030169	low-density lipoprotein particle binding	1/248	16/17697	0.202203	0.384729	0.322125	CRP	1
GO:0031420	alkali metal ion binding	1/248	16/17697	0.202203	0.384729	0.322125	SLC34A2	1
GO:0047498	calcium-dependent phospholipase A2 activity	1/248	16/17697	0.202203	0.384729	0.322125	PLA2G4F	1
GO:0050700	CARD domain binding	1/248	16/17697	0.202203	0.384729	0.322125	RIPK2	1
GO:0050780	dopamine receptor binding	1/248	16/17697	0.202203	0.384729	0.322125	DRD3	1
GO:0061778	intracellular chloride channel activity	1/248	16/17697	0.202203	0.384729	0.322125	CLCA1	1
GO:0071837	HMG box domain binding	1/248	16/17697	0.202203	0.384729	0.322125	ALX4	1
GO:0022824	transmitter-gated ion channel activity	2/248	61/17697	0.210557	0.395405	0.331064	GABRA6/HTR3B	2
GO:0022835	transmitter-gated channel activity	2/248	61/17697	0.210557	0.395405	0.331064	GABRA6/HTR3B	2
GO:0004198	calcium-dependent cysteine-type endopeptidase activity	1/248	17/17697	0.213393	0.395405	0.331064	CAPN6	1
GO:0004935	adrenergic receptor activity	1/248	17/17697	0.213393	0.395405	0.331064	DRD3	1
GO:0009881	photoreceptor activity	1/248	17/17697	0.213393	0.395405	0.331064	RHO	1
GO:0010314	phosphatidylinositol-5-phosphate binding	1/248	17/17697	0.213393	0.395405	0.331064	PLCZ1	1
GO:0042834	peptidoglycan binding	1/248	17/17697	0.213393	0.395405	0.331064	IGHM	1
GO:0098918	structural constituent of synapse	1/248	17/17697	0.213393	0.395405	0.331064	NEFL	1
GO:0004714	transmembrane receptor protein tyrosine kinase activity	2/248	62/17697	0.215701	0.39838	0.333555	MET/ROS1	2
GO:0005416	amino acid:cation symporter activity	1/248	18/17697	0.224427	0.407853	0.341487	SLC6A7	1
GO:0008569	ATP-dependent microtubule motor activity, minus-end-directed	1/248	18/17697	0.224427	0.407853	0.341487	DNAH11	1
GO:0016755	transferase activity, transferring amino-acyl groups	1/248	18/17697	0.224427	0.407853	0.341487	TGM7	1
GO:0017127	cholesterol transporter activity	1/248	18/17697	0.224427	0.407853	0.341487	APOA2	1
GO:0120020	intermembrane cholesterol transfer activity	1/248	18/17697	0.224427	0.407853	0.341487	APOA2	1
GO:0031072	heat shock protein binding	3/248	119/17697	0.233324	0.418241	0.350184	APOA2/HSPA6/EEF1AKMT3	3
GO:0031490	chromatin DNA binding	3/248	119/17697	0.233324	0.418241	0.350184	ATOH1/H3C14/PRDM13	3
GO:0004653	polypeptide N-acetylgalactosaminyltransferase activity	1/248	19/17697	0.235307	0.418241	0.350184	GALNT5	1
GO:0004890	GABA-A receptor activity	1/248	19/17697	0.235307	0.418241	0.350184	GABRA6	1
GO:0015296	anion:cation symporter activity	1/248	19/17697	0.235307	0.418241	0.350184	SLC6A3	1
GO:0070300	phosphatidic acid binding	1/248	19/17697	0.235307	0.418241	0.350184	NRGN	1
GO:0120015	intermembrane sterol transfer activity	1/248	19/17697	0.235307	0.418241	0.350184	APOA2	1
GO:0001614	purinergic nucleotide receptor activity	1/248	20/17697	0.246034	0.431893	0.361615	P2RX2	1
GO:0008329	signaling pattern recognition receptor activity	1/248	20/17697	0.246034	0.431893	0.361615	MARCO	1
GO:0016502	nucleotide receptor activity	1/248	20/17697	0.246034	0.431893	0.361615	P2RX2	1
GO:0099095	ligand-gated anion channel activity	1/248	20/17697	0.246034	0.431893	0.361615	GABRA6	1
GO:0005262	calcium channel activity	3/248	123/17697	0.248246	0.43443	0.363739	CALHM1/MCOLN3/TRPA1	3
GO:0001848	complement binding	1/248	21/17697	0.256612	0.43825	0.366938	CRP	1
GO:0004602	glutathione peroxidase activity	1/248	21/17697	0.256612	0.43825	0.366938	GSTA1	1
GO:0004806	triglyceride lipase activity	1/248	21/17697	0.256612	0.43825	0.366938	LIPF	1
GO:0008106	alcohol dehydrogenase (NADP+) activity	1/248	21/17697	0.256612	0.43825	0.366938	AKR1D1	1
GO:0008483	transaminase activity	1/248	21/17697	0.256612	0.43825	0.366938	AGXT	1
GO:0034237	protein kinase A regulatory subunit binding	1/248	21/17697	0.256612	0.43825	0.366938	AKAP14	1
GO:0038187	pattern recognition receptor activity	1/248	21/17697	0.256612	0.43825	0.366938	MARCO	1
GO:0050750	low-density lipoprotein particle receptor binding	1/248	21/17697	0.256612	0.43825	0.366938	CRP	1
GO:0017022	myosin binding	2/248	71/17697	0.262357	0.446716	0.374026	ACTC1/MYOC	2
GO:0005537	mannose binding	1/248	22/17697	0.267042	0.448053	0.375145	CLEC4M	1
GO:0016917	GABA receptor activity	1/248	22/17697	0.267042	0.448053	0.375145	GABRA6	1
GO:0030021	extracellular matrix structural constituent conferring compression resistance	1/248	22/17697	0.267042	0.448053	0.375145	PRG4	1
GO:0050431	transforming growth factor beta binding	1/248	22/17697	0.267042	0.448053	0.375145	WFIKKN2	1
GO:0019955	cytokine binding	3/248	128/17697	0.267093	0.448053	0.375145	IL31RA/IL5RA/WFIKKN2	3
GO:0016769	transferase activity, transferring nitrogenous groups	1/248	23/17697	0.277326	0.459488	0.384719	AGXT	1
GO:0044183	protein binding involved in protein folding	1/248	23/17697	0.277326	0.459488	0.384719	HSPA6	1
GO:0001618	virus receptor activity	2/248	74/17697	0.277962	0.459488	0.384719	CLEC4M/GPR15	2
GO:0015171	amino acid transmembrane transporter activity	2/248	74/17697	0.277962	0.459488	0.384719	SLC6A18/SLC6A7	2
GO:0104005	hijacked molecular function	2/248	74/17697	0.277962	0.459488	0.384719	CLEC4M/GPR15	2
GO:0005254	chloride channel activity	2/248	75/17697	0.28316	0.464022	0.388516	CLCA1/GABRA6	2
GO:0016835	carbon-oxygen lyase activity	2/248	75/17697	0.28316	0.464022	0.388516	CA3/CA4	2
GO:0048029	monosaccharide binding	2/248	75/17697	0.28316	0.464022	0.388516	CLEC4M/SFTPA1	2
GO:0001965	G-protein alpha-subunit binding	1/248	24/17697	0.287467	0.466071	0.390231	LPAR3	1
GO:0015295	solute:proton symporter activity	1/248	24/17697	0.287467	0.466071	0.390231	SLC15A1	1
GO:0120013	intermembrane lipid transfer activity	1/248	24/17697	0.287467	0.466071	0.390231	APOA2	1
GO:0015077	monovalent inorganic cation transmembrane transporter activity	7/248	382/17697	0.289227	0.466071	0.390231	ABCB11/KCNS1/SLC15A1/SLC34A2/SLC6A18/SLC6A3/SLC6A7	7
GO:0004713	protein tyrosine kinase activity	3/248	134/17697	0.289919	0.466071	0.390231	RIPK2/MET/ROS1	3
GO:0070851	growth factor receptor binding	3/248	134/17697	0.289919	0.466071	0.390231	CSF3/FGF7/IL6	3
GO:0005261	cation channel activity	6/248	319/17697	0.290518	0.466071	0.390231	CALHM1/HTR3B/KCNS1/MCOLN3/P2RX2/TRPA1	6
GO:0001871	pattern binding	1/248	25/17697	0.297466	0.466071	0.390231	PRG4	1
GO:0005104	fibroblast growth factor receptor binding	1/248	25/17697	0.297466	0.466071	0.390231	FGF7	1
GO:0015101	organic cation transmembrane transporter activity	1/248	25/17697	0.297466	0.466071	0.390231	SLC18A3	1
GO:0030247	polysaccharide binding	1/248	25/17697	0.297466	0.466071	0.390231	PRG4	1
GO:0035586	purinergic receptor activity	1/248	25/17697	0.297466	0.466071	0.390231	P2RX2	1
GO:0045503	dynein light chain binding	1/248	25/17697	0.297466	0.466071	0.390231	DNAH11	1
GO:0102567	phospholipase A2 activity (consuming 1,2-dipalmitoylphosphatidylcholine)	1/248	25/17697	0.297466	0.466071	0.390231	PLA2G4F	1
GO:0102568	phospholipase A2 activity consuming 1,2-dioleoylphosphatidylethanolamine)	1/248	25/17697	0.297466	0.466071	0.390231	PLA2G4F	1
GO:0052689	carboxylic ester hydrolase activity	3/248	136/17697	0.297562	0.466071	0.390231	LGALS13/LIPF/PLA2G4F	3
GO:0019838	growth factor binding	3/248	137/17697	0.301388	0.470078	0.393586	COL2A1/WFIKKN2/CCN4	3
GO:0051015	actin filament binding	4/248	198/17697	0.301778	0.470078	0.393586	ANXA8/ESPN/MYH11/XIRP1	4
GO:0019199	transmembrane receptor protein kinase activity	2/248	79/17697	0.303911	0.470954	0.39432	MET/ROS1	2
GO:0004033	aldo-keto reductase (NADP) activity	1/248	26/17697	0.307325	0.470954	0.39432	AKR1D1	1
GO:0004435	phosphatidylinositol phospholipase C activity	1/248	26/17697	0.307325	0.470954	0.39432	PLCZ1	1
GO:0004709	MAP kinase kinase kinase activity	1/248	26/17697	0.307325	0.470954	0.39432	RIPK2	1
GO:0016628	oxidoreductase activity, acting on the CH-CH group of donors, NAD or NADP as acceptor	1/248	26/17697	0.307325	0.470954	0.39432	AKR1D1	1
GO:0051787	misfolded protein binding	1/248	26/17697	0.307325	0.470954	0.39432	HSPA6	1
GO:0015085	calcium ion transmembrane transporter activity	3/248	139/17697	0.309048	0.472319	0.395462	CALHM1/MCOLN3/TRPA1	3
GO:0019903	protein phosphatase binding	3/248	140/17697	0.312881	0.476891	0.39929	MET/ROS1/SLC6A3	3
GO:0001968	fibronectin binding	1/248	27/17697	0.317046	0.480655	0.402442	MYOC	1
GO:0004364	glutathione transferase activity	1/248	27/17697	0.317046	0.480655	0.402442	GSTA1	1
GO:0004629	phospholipase C activity	1/248	28/17697	0.326631	0.489947	0.410222	PLCZ1	1
GO:0005227	calcium activated cation channel activity	1/248	28/17697	0.326631	0.489947	0.410222	CALHM1	1
GO:0005343	organic acid:sodium symporter activity	1/248	28/17697	0.326631	0.489947	0.410222	SLC6A7	1
GO:0005520	insulin-like growth factor binding	1/248	28/17697	0.326631	0.489947	0.410222	CCN4	1
GO:0038024	cargo receptor activity	2/248	85/17697	0.334816	0.498845	0.417672	MARCO/PRG4	2
GO:0043178	alcohol binding	2/248	85/17697	0.334816	0.498845	0.417672	APOA2/APOC3	2
GO:0045505	dynein intermediate chain binding	1/248	29/17697	0.336083	0.498845	0.417672	DNAH11	1
GO:0051959	dynein light intermediate chain binding	1/248	29/17697	0.336083	0.498845	0.417672	DNAH11	1
GO:0008276	protein methyltransferase activity	2/248	87/17697	0.345034	0.510007	0.427018	EEF1AKMT3/PRDM13	2
GO:0043325	phosphatidylinositol-3,4-bisphosphate binding	1/248	30/17697	0.345402	0.510007	0.427018	ANXA8	1
GO:0005164	tumor necrosis factor receptor binding	1/248	31/17697	0.354591	0.515781	0.431852	CD70	1
GO:0005231	excitatory extracellular ligand-gated ion channel activity	1/248	31/17697	0.354591	0.515781	0.431852	P2RX2	1
GO:0015248	sterol transporter activity	1/248	31/17697	0.354591	0.515781	0.431852	APOA2	1
GO:0015301	anion:anion antiporter activity	1/248	31/17697	0.354591	0.515781	0.431852	SLC22A9	1
GO:0042605	peptide antigen binding	1/248	31/17697	0.354591	0.515781	0.431852	CLEC4M	1
GO:0005253	anion channel activity	2/248	89/17697	0.355202	0.515781	0.431852	CLCA1/GABRA6	2
GO:0008168	methyltransferase activity	4/248	215/17697	0.35568	0.515781	0.431852	RNMT/EEF1AKMT3/METTL7B/PRDM13	4
GO:0005506	iron ion binding	3/248	152/17697	0.358863	0.519069	0.434606	ALOX15/CYP26A1/LCN2	3
GO:0051721	protein phosphatase 2A binding	1/248	32/17697	0.363651	0.522	0.43706	SLC6A3	1
GO:0071855	neuropeptide receptor binding	1/248	32/17697	0.363651	0.522	0.43706	CRH	1
GO:1904680	peptide transmembrane transporter activity	1/248	32/17697	0.363651	0.522	0.43706	SLC15A1	1
GO:0051213	dioxygenase activity	2/248	91/17697	0.365313	0.523061	0.437948	ALOX15/PTGS2	2
GO:0042623	ATPase activity, coupled	5/248	284/17697	0.367143	0.524358	0.439034	ABCB11/ABCC12/DNAH11/HSPA6/TNNT2	5
GO:0004623	phospholipase A2 activity	1/248	33/17697	0.372585	0.526822	0.441097	PLA2G4F	1
GO:0005251	delayed rectifier potassium channel activity	1/248	33/17697	0.372585	0.526822	0.441097	KCNS1	1
GO:0015662	ATPase activity, coupled to transmembrane movement of ions, phosphorylative mechanism	1/248	33/17697	0.372585	0.526822	0.441097	ABCB11	1
GO:0048019	receptor antagonist activity	1/248	33/17697	0.372585	0.526822	0.441097	WFIKKN2	1
GO:0004993	G protein-coupled serotonin receptor activity	1/248	34/17697	0.381394	0.535273	0.448172	OR6T1	1
GO:0005504	fatty acid binding	1/248	34/17697	0.381394	0.535273	0.448172	HNF4A	1
GO:0099589	serotonin receptor activity	1/248	34/17697	0.381394	0.535273	0.448172	OR6T1	1
GO:0001530	lipopolysaccharide binding	1/248	35/17697	0.390079	0.541528	0.45341	SFTPA1	1
GO:0016229	steroid dehydrogenase activity	1/248	35/17697	0.390079	0.541528	0.45341	AKR1D1	1
GO:0004896	cytokine receptor activity	2/248	96/17697	0.390314	0.541528	0.45341	IL31RA/IL5RA	2
GO:0008170	N-methyltransferase activity	2/248	96/17697	0.390314	0.541528	0.45341	RNMT/EEF1AKMT3	2
GO:0016741	transferase activity, transferring one-carbon groups	4/248	226/17697	0.390626	0.541528	0.45341	RNMT/EEF1AKMT3/METTL7B/PRDM13	4
GO:0042277	peptide binding	5/248	295/17697	0.397706	0.549953	0.460464	CLEC4M/MARCO/MAS1/NPBWR2/SSTR3	5
GO:0043394	proteoglycan binding	1/248	36/17697	0.398643	0.549953	0.460464	COL2A1	1
GO:0004497	monooxygenase activity	2/248	99/17697	0.405105	0.557511	0.466792	AKR1D1/CYP26A1	2
GO:0008200	ion channel inhibitor activity	1/248	37/17697	0.407088	0.558883	0.467941	AMBP	1
GO:0016248	channel inhibitor activity	1/248	38/17697	0.415414	0.568937	0.476358	AMBP	1
GO:0005109	frizzled binding	1/248	39/17697	0.423624	0.577272	0.483337	MYOC	1
GO:0032266	phosphatidylinositol-3-phosphate binding	1/248	39/17697	0.423624	0.577272	0.483337	PLCZ1	1
GO:0004222	metalloendopeptidase activity	2/248	103/17697	0.424554	0.577272	0.483337	ADAMTS16/ECEL1	2
GO:0004520	endodeoxyribonuclease activity	1/248	41/17697	0.439701	0.592186	0.495824	DNASE1L3	1
GO:0030020	extracellular matrix structural constituent conferring tensile strength	1/248	41/17697	0.439701	0.592186	0.495824	COL2A1	1
GO:0030547	receptor inhibitor activity	1/248	41/17697	0.439701	0.592186	0.495824	WFIKKN2	1
GO:0099528	G protein-coupled neurotransmitter receptor activity	1/248	41/17697	0.439701	0.592186	0.495824	OR6T1	1
GO:0035091	phosphatidylinositol binding	4/248	245/17697	0.450224	0.604922	0.506488	ALOX15/ANXA8/NRGN/PLCZ1	4
GO:0016887	ATPase activity	6/248	384/17697	0.45179	0.60559	0.507048	ABCB11/ABCC12/ACTC1/DNAH11/HSPA6/TNNT2	6
GO:0001221	transcription cofactor binding	1/248	43/17697	0.455331	0.608897	0.509817	SIX3	1
GO:0015026	coreceptor activity	1/248	44/17697	0.462982	0.616223	0.51595	GPR15	1
GO:1990939	ATP-dependent microtubule motor activity	1/248	44/17697	0.462982	0.616223	0.51595	DNAH11	1
GO:0008237	metallopeptidase activity	3/248	181/17697	0.467161	0.620328	0.519387	ADAMTS16/CLCA1/ECEL1	3
GO:0004721	phosphoprotein phosphatase activity	3/248	182/17697	0.470766	0.623655	0.522173	PTPRB/PTPRR/PTPRQ	3
GO:0004715	non-membrane spanning protein tyrosine kinase activity	1/248	46/17697	0.477965	0.625446	0.523673	RIPK2	1
GO:0016893	endonuclease activity, active with either ribo- or deoxyribonucleic acids and producing 5'-phosphomonoesters	1/248	46/17697	0.477965	0.625446	0.523673	DNASE1L3	1
GO:0042805	actinin binding	1/248	46/17697	0.477965	0.625446	0.523673	CSRP1	1
GO:0042626	ATPase activity, coupled to transmembrane movement of substances	2/248	115/17697	0.480819	0.625446	0.523673	ABCB11/ABCC12	2
GO:0043492	ATPase activity, coupled to movement of substances	2/248	115/17697	0.480819	0.625446	0.523673	ABCB11/ABCC12	2
GO:0019902	phosphatase binding	3/248	185/17697	0.481515	0.625446	0.523673	MET/ROS1/SLC6A3	3
GO:0008374	O-acyltransferase activity	1/248	47/17697	0.4853	0.625446	0.523673	CHAT	1
GO:0008376	acetylgalactosaminyltransferase activity	1/248	47/17697	0.4853	0.625446	0.523673	GALNT5	1
GO:0016860	intramolecular oxidoreductase activity	1/248	47/17697	0.4853	0.625446	0.523673	GSTA1	1
GO:0042887	amide transmembrane transporter activity	1/248	47/17697	0.4853	0.625446	0.523673	SLC15A1	1
GO:1904315	transmitter-gated ion channel activity involved in regulation of postsynaptic membrane potential	1/248	47/17697	0.4853	0.625446	0.523673	GABRA6	1
GO:0004197	cysteine-type endopeptidase activity	2/248	116/17697	0.485355	0.625446	0.523673	CAPN6/USP29	2
GO:0005245	voltage-gated calcium channel activity	1/248	48/17697	0.492532	0.631823	0.529012	CALHM1	1
GO:0005246	calcium channel regulator activity	1/248	48/17697	0.492532	0.631823	0.529012	AMBP	1
GO:0099106	ion channel regulator activity	2/248	118/17697	0.494354	0.632728	0.52977	AMBP/KCNS1	2
GO:0051018	protein kinase A binding	1/248	50/17697	0.506694	0.642719	0.538135	AKAP14	1
GO:0070888	E-box binding	1/248	50/17697	0.506694	0.642719	0.538135	NEUROD2	1
GO:0098632	cell-cell adhesion mediator activity	1/248	50/17697	0.506694	0.642719	0.538135	DSG2	1
GO:0099529	neurotransmitter receptor activity involved in regulation of postsynaptic membrane potential	1/248	50/17697	0.506694	0.642719	0.538135	GABRA6	1
GO:0015405	P-P-bond-hydrolysis-driven transmembrane transporter activity	2/248	123/17697	0.516411	0.652881	0.546643	ABCB11/ABCC12	2
GO:0005070	SH3/SH2 adaptor activity	1/248	52/17697	0.520462	0.652881	0.546643	SH2D3C	1
GO:0008146	sulfotransferase activity	1/248	52/17697	0.520462	0.652881	0.546643	SULT2A1	1
GO:0015459	potassium channel regulator activity	1/248	52/17697	0.520462	0.652881	0.546643	KCNS1	1
GO:0098960	postsynaptic neurotransmitter receptor activity	1/248	52/17697	0.520462	0.652881	0.546643	GABRA6	1
GO:0015399	primary active transmembrane transporter activity	2/248	125/17697	0.525054	0.657187	0.550248	ABCB11/ABCC12	2
GO:0004519	endonuclease activity	2/248	127/17697	0.533593	0.659459	0.55215	DNASE1L3/SLFN13	2
GO:0005516	calmodulin binding	3/248	200/17697	0.533623	0.659459	0.55215	IQCF3/MYH11/NRGN	3
GO:0015179	L-amino acid transmembrane transporter activity	1/248	54/17697	0.533847	0.659459	0.55215	SLC6A7	1
GO:0030170	pyridoxal phosphate binding	1/248	54/17697	0.533847	0.659459	0.55215	AGXT	1
GO:0070279	vitamin B6 binding	1/248	54/17697	0.533847	0.659459	0.55215	AGXT	1
GO:0140104	molecular carrier activity	1/248	54/17697	0.533847	0.659459	0.55215	NGB	1
GO:0016614	oxidoreductase activity, acting on CH-OH group of donors	2/248	128/17697	0.537823	0.662926	0.555053	AKR1D1/LIPF	2
GO:0031492	nucleosomal DNA binding	1/248	55/17697	0.5404	0.663218	0.555298	H3C14	1
GO:0042165	neurotransmitter binding	1/248	55/17697	0.5404	0.663218	0.555298	CRP	1
GO:0042054	histone methyltransferase activity	1/248	57/17697	0.553231	0.677499	0.567255	PRDM13	1
GO:0016627	oxidoreductase activity, acting on the CH-CH group of donors	1/248	58/17697	0.559512	0.680564	0.569822	AKR1D1	1
GO:0016765	transferase activity, transferring alkyl or aryl (other than methyl) groups	1/248	58/17697	0.559512	0.680564	0.569822	GSTA1	1
GO:0099516	ion antiporter activity	1/248	58/17697	0.559512	0.680564	0.569822	SLC22A9	1
GO:0033218	amide binding	5/248	356/17697	0.560535	0.680564	0.569822	CLEC4M/MARCO/MAS1/NPBWR2/SSTR3	5
GO:0004536	deoxyribonuclease activity	1/248	59/17697	0.565705	0.682457	0.571407	DNASE1L3	1
GO:0016597	amino acid binding	1/248	59/17697	0.565705	0.682457	0.571407	AGXT	1
GO:0098631	cell adhesion mediator activity	1/248	59/17697	0.565705	0.682457	0.571407	DSG2	1
GO:0003774	motor activity	2/248	136/17697	0.570708	0.685449	0.573911	DNAH11/MYH11	2
GO:0000049	tRNA binding	1/248	60/17697	0.571812	0.685449	0.573911	SLFN13	1
GO:0016279	protein-lysine N-methyltransferase activity	1/248	60/17697	0.571812	0.685449	0.573911	EEF1AKMT3	1
GO:0016278	lysine N-methyltransferase activity	1/248	61/17697	0.577833	0.689287	0.577125	EEF1AKMT3	1
GO:0048306	calcium-dependent protein binding	1/248	61/17697	0.577833	0.689287	0.577125	CLEC4M	1
GO:0019842	vitamin binding	2/248	138/17697	0.578661	0.689287	0.577125	AGXT/RHO	2
GO:0022843	voltage-gated cation channel activity	2/248	142/17697	0.594242	0.706252	0.59133	CALHM1/KCNS1	2
GO:0004521	endoribonuclease activity	1/248	64/17697	0.595394	0.706252	0.59133	SLFN13	1
GO:0016247	channel regulator activity	2/248	144/17697	0.601871	0.712444	0.596514	AMBP/KCNS1	2
GO:0008173	RNA methyltransferase activity	1/248	66/17697	0.606696	0.715169	0.598796	RNMT	1
GO:0019829	cation-transporting ATPase activity	1/248	66/17697	0.606696	0.715169	0.598796	ABCB11	1
GO:0022853	active ion transmembrane transporter activity	1/248	67/17697	0.612228	0.718702	0.601754	ABCB11	1
GO:0042625	ATPase coupled ion transmembrane transporter activity	1/248	67/17697	0.612228	0.718702	0.601754	ABCB11	1
GO:0016782	transferase activity, transferring sulfur-containing groups	1/248	69/17697	0.623061	0.728403	0.609876	SULT2A1	1
GO:0030971	receptor tyrosine kinase binding	1/248	69/17697	0.623061	0.728403	0.609876	MYOC	1
GO:0008757	S-adenosylmethionine-dependent methyltransferase activity	2/248	155/17697	0.641897	0.74888	0.627021	RNMT/EEF1AKMT3	2
GO:0016811	hydrolase activity, acting on carbon-nitrogen (but not peptide) bonds, in linear amides	1/248	73/17697	0.643831	0.749594	0.627619	KLK3	1
GO:0019003	GDP binding	1/248	74/17697	0.648843	0.753881	0.631208	RASEF	1
GO:0016853	isomerase activity	2/248	158/17697	0.65225	0.75629	0.633225	ALOX15/GSTA1	2
GO:0001540	amyloid-beta binding	1/248	78/17697	0.668198	0.773201	0.647384	MARCO	1
GO:0005089	Rho guanyl-nucleotide exchange factor activity	1/248	79/17697	0.672868	0.777019	0.650581	PLEKHG4B	1
GO:0035591	signaling adaptor activity	1/248	80/17697	0.677473	0.780747	0.653702	SH2D3C	1
GO:0030674	protein binding, bridging	2/248	170/17697	0.691295	0.795059	0.665686	SH2D3C/NEFL	2
GO:0003777	microtubule motor activity	1/248	84/17697	0.695256	0.797996	0.668145	DNAH11	1
GO:0015297	antiporter activity	1/248	85/17697	0.699547	0.799684	0.669558	SLC22A9	1
GO:0031491	nucleosome binding	1/248	85/17697	0.699547	0.799684	0.669558	H3C14	1
GO:0050839	cell adhesion molecule binding	6/248	499/17697	0.703817	0.802946	0.67229	DSG2/FGB/FGG/POSTN/PTPRB/CCN4	6
GO:0005249	voltage-gated potassium channel activity	1/248	87/17697	0.707949	0.806039	0.674879	KCNS1	1
GO:0003779	actin binding	5/248	431/17697	0.725462	0.824323	0.690188	ANXA8/ESPN/MYH11/TNNT2/XIRP1	5
GO:1990782	protein tyrosine kinase binding	1/248	93/17697	0.731777	0.8275	0.692848	MYOC	1
GO:0008234	cysteine-type peptidase activity	2/248	184/17697	0.732221	0.8275	0.692848	CAPN6/USP29	2
GO:0051427	hormone receptor binding	2/248	185/17697	0.734961	0.8275	0.692848	CCK/CRH	2
GO:0004553	hydrolase activity, hydrolyzing O-glycosyl compounds	1/248	94/17697	0.735556	0.8275	0.692848	LYZL6	1
GO:0008081	phosphoric diester hydrolase activity	1/248	94/17697	0.735556	0.8275	0.692848	PLCZ1	1
GO:0016829	lyase activity	2/248	187/17697	0.74037	0.831267	0.696002	CA3/CA4	2
GO:0000980	RNA polymerase II distal enhancer sequence-specific DNA binding	1/248	99/17697	0.753669	0.844526	0.707103	SIX3	1
GO:0051087	chaperone binding	1/248	102/17697	0.763937	0.853308	0.714456	FGB	1
GO:0005244	voltage-gated ion channel activity	2/248	197/17697	0.766021	0.853308	0.714456	CALHM1/KCNS1	2
GO:0022832	voltage-gated channel activity	2/248	197/17697	0.766021	0.853308	0.714456	CALHM1/KCNS1	2
GO:0004843	thiol-dependent ubiquitin-specific protease activity	1/248	106/17697	0.776969	0.863806	0.723246	USP29	1
GO:0004518	nuclease activity	2/248	205/17697	0.784935	0.870732	0.729045	DNASE1L3/SLFN13	2
GO:0047485	protein N-terminus binding	1/248	109/17697	0.78627	0.870732	0.729045	SLC6A3	1
GO:0016407	acetyltransferase activity	1/248	110/17697	0.789284	0.872366	0.730413	CHAT	1
GO:0042826	histone deacetylase binding	1/248	111/17697	0.792255	0.873947	0.731737	SIX3	1
GO:0003697	single-stranded DNA binding	1/248	113/17697	0.798073	0.876684	0.734028	IGHM	1
GO:0004540	ribonuclease activity	1/248	114/17697	0.800921	0.876684	0.734028	SLFN13	1
GO:0036459	thiol-dependent ubiquitinyl hydrolase activity	1/248	114/17697	0.800921	0.876684	0.734028	USP29	1
GO:0101005	ubiquitinyl hydrolase activity	1/248	114/17697	0.800921	0.876684	0.734028	USP29	1
GO:0005085	guanyl-nucleotide exchange factor activity	2/248	214/17697	0.8046	0.879014	0.735979	SH2D3C/PLEKHG4B	2
GO:0016798	hydrolase activity, acting on glycosyl bonds	1/248	117/17697	0.809227	0.882369	0.738788	LYZL6	1
GO:0001158	enhancer sequence-specific DNA binding	1/248	119/17697	0.814572	0.884793	0.740818	SIX3	1
GO:0016616	oxidoreductase activity, acting on the CH-OH group of donors, NAD or NADP as acceptor	1/248	119/17697	0.814572	0.884793	0.740818	AKR1D1	1
GO:0005267	potassium channel activity	1/248	123/17697	0.824818	0.890803	0.74585	KCNS1	1
GO:0016810	hydrolase activity, acting on carbon-nitrogen (but not peptide) bonds	1/248	123/17697	0.824818	0.890803	0.74585	KLK3	1
GO:0019783	ubiquitin-like protein-specific protease activity	1/248	123/17697	0.824818	0.890803	0.74585	USP29	1
GO:0017124	SH3 domain binding	1/248	130/17697	0.84141	0.905526	0.758177	ESPN	1
GO:0051082	unfolded protein binding	1/248	131/17697	0.843648	0.905526	0.758177	HSPA6	1
GO:0005178	integrin binding	1/248	132/17697	0.845856	0.905526	0.758177	CCN4	1
GO:0060090	molecular adaptor activity	2/248	237/17697	0.847787	0.905526	0.758177	SH2D3C/NEFL	2
GO:0015078	proton transmembrane transporter activity	1/248	133/17697	0.848032	0.905526	0.758177	SLC15A1	1
GO:0035326	enhancer binding	1/248	133/17697	0.848032	0.905526	0.758177	SIX3	1
GO:0015631	tubulin binding	3/248	336/17697	0.853037	0.909158	0.761218	CAPN6/NEFM/STMND1	3
GO:0005088	Ras guanyl-nucleotide exchange factor activity	1/248	137/17697	0.856436	0.911068	0.762817	PLEKHG4B	1
GO:0008017	microtubule binding	2/248	246/17697	0.862192	0.915474	0.766506	CAPN6/NEFM	2
GO:0008194	UDP-glycosyltransferase activity	1/248	151/17697	0.882366	0.935143	0.782975	GALNT5	1
GO:0016746	transferase activity, transferring acyl groups	2/248	264/17697	0.887334	0.938653	0.785914	CHAT/TGM7	2
GO:0015079	potassium ion transmembrane transporter activity	1/248	159/17697	0.89503	0.945032	0.791255	KCNS1	1
GO:0017137	Rab GTPase binding	1/248	175/17697	0.916428	0.965827	0.808666	BICDL2	1
GO:0017048	Rho GTPase binding	1/248	177/17697	0.918777	0.966506	0.809234	PLEKHG4B	1
GO:0008022	protein C-terminus binding	1/248	187/17697	0.929572	0.97605	0.817226	NEFL	1
GO:0003713	transcription coactivator activity	2/248	319/17697	0.940229	0.984102	0.823967	IL31RA/SIX3	2
GO:0004984	olfactory receptor activity	3/248	427/17697	0.940711	0.984102	0.823967	OR1N2/OR51E2/OR6T1	3
GO:0003924	GTPase activity	2/248	324/17697	0.943644	0.985352	0.825014	GTPBP4/RASEF	2
GO:0140097	catalytic activity, acting on DNA	1/248	213/17697	0.951408	0.98966	0.828621	DNASE1L3	1
GO:0016758	transferase activity, transferring hexosyl groups	1/248	216/17697	0.953447	0.98966	0.828621	GALNT5	1
GO:0061630	ubiquitin protein ligase activity	1/248	221/17697	0.956657	0.98966	0.828621	FBXO40	1
GO:0061659	ubiquitin-like protein ligase activity	1/248	230/17697	0.96189	0.98966	0.828621	FBXO40	1
GO:0016747	transferase activity, transferring acyl groups other than amino-acyl groups	1/248	232/17697	0.962965	0.98966	0.828621	CHAT	1
GO:0003714	transcription corepressor activity	1/248	238/17697	0.96601	0.98966	0.828621	NEUROD2	1
GO:0001227	DNA-binding transcription repressor activity, RNA polymerase II-specific	1/248	242/17697	0.967901	0.98966	0.828621	DMBX1	1
GO:0005525	GTP binding	2/248	374/17697	0.969	0.98966	0.828621	GTPBP4/RASEF	2
GO:0032550	purine ribonucleoside binding	2/248	378/17697	0.970467	0.98966	0.828621	GTPBP4/RASEF	2
GO:0001883	purine nucleoside binding	2/248	381/17697	0.971524	0.98966	0.828621	GTPBP4/RASEF	2
GO:0032549	ribonucleoside binding	2/248	382/17697	0.971868	0.98966	0.828621	GTPBP4/RASEF	2
GO:1903231	mRNA binding involved in posttranscriptional gene silencing	1/248	252/17697	0.972182	0.98966	0.828621	MIR149	1
GO:0140098	catalytic activity, acting on RNA	2/248	386/17697	0.973205	0.98966	0.828621	RNMT/SLFN13	2
GO:0001882	nucleoside binding	2/248	389/17697	0.974167	0.98966	0.828621	GTPBP4/RASEF	2
GO:0019001	guanyl nucleotide binding	2/248	394/17697	0.975697	0.98966	0.828621	GTPBP4/RASEF	2
GO:0032561	guanyl ribonucleotide binding	2/248	394/17697	0.975697	0.98966	0.828621	GTPBP4/RASEF	2
GO:0016757	transferase activity, transferring glycosyl groups	1/248	280/17697	0.981376	0.991981	0.830564	GALNT5	1
GO:0050662	coenzyme binding	1/248	291/17697	0.984094	0.991981	0.830564	AGXT	1
GO:0017016	Ras GTPase binding	2/248	429/17697	0.984208	0.991981	0.830564	BICDL2/PLEKHG4B	2
GO:0004674	protein serine/threonine kinase activity	2/248	439/17697	0.986054	0.991981	0.830564	RIPK2/MAP3K19	2
GO:0031267	small GTPase binding	2/248	443/17697	0.986732	0.991981	0.830564	BICDL2/PLEKHG4B	2
GO:0045296	cadherin binding	1/248	331/17697	0.991047	0.994555	0.832719	PTPRB	1
GO:0004842	ubiquitin-protein transferase activity	1/248	382/17697	0.995705	0.997006	0.834772	FBXO40	1
GO:0019787	ubiquitin-like protein transferase activity	1/248	407/17697	0.997006	0.997006	0.834772	FBXO40	1
