# Supplementary material for: Clinical Significance and Molecular Annotation of Cellular Morphometric Subtypes in Lower Grade Gliomas discovered by Machine Learning: a retrospective multicentric study
Source: Research Square preprint supplement (doi:10.21203/rs.3.rs-770415/v1), 2021-08-12
Supplement: Supplementary file 3 [file 1e0a29d9d2acd2726291e946.docx]

**Supplementary Table 6. Description of cellular morphometric descriptors.**

| **Cellular Morphometric Descriptor** | **Description** |
| --- | --- |
| Nuclear Size | Number of pixels of a segmented nuclear region |
| Cellular Voronoi Size | Number pixels of the voronoi region, where the segmented nucleus resides |
| Aspect Ratio | Aspect ratio of the segmented nucleus |
| Major Axis | Length of Major axis of the segmented nucleus |
| Minor Axis | Length of Minor axis of the segmented nucleus |
| Rotation | Angle between major axis and X axis of the segmented nucleus |
| Bending Energy | Mean squared curvature values along nuclear contour |
| STD Curvature | Standard deviation of absolute curvature values along nuclear contour |
| Abs Max Curvature | Maximum absolute curvature values along nuclear contour |
| Mean Nuclear Intensity | Mean intensity in nuclear region measured in gray scale |
| STD Nuclear Intensity | Standard deviation of intensity in nuclear region measured in gray scale |
| Mean Background Intensity | Mean intensity of nuclear background measured in gray scale |
| STD Background Intensity | Standard deviation of intensity of nuclear background measured in gray scale |
| Mean Nuclear Gradient | Mean gradient within nuclear region measured in gray scale |
| STD Nuclear Gradient | Standard deviation of gradient within nuclear region measured in gray scale |
