# Supplementary material for: Clinical Significance and Molecular Annotation of Cellular Morphometric Subtypes in Lower Grade Gliomas discovered by Machine Learning: a retrospective multicentric study
Source: Research Square preprint supplement (doi:10.21203/rs.3.rs-770415/v1), 2021-08-12
Supplement: Supplementary file 5 [file 6f6251238bff78adafdb178f.xlsx]

## Sheet: TableS10-TCGA-GBM-CMC_new
Supplementary Table 10. Metadata and cellular morphometric representation of patients in TCGA-GBM cohort.
ID	OS.time	OS	Gender	TCGA subtpye	IDH status	Race list	MGMT promoter status	ATRX status	Chr 7 gain Chr 10 loss	X1p 19q codeletion	Subtype	CMB_168	CMB_89	CMB_166	CMB_131	CMB_116	CMB_2	CMB_140	CMB_197	CMB_17	CMB_43	CMB_202	CMB_210	CMB_83	CMB_23	CMB_162	CMB_145	CMB_139	CMB_115	CMB_208	CMB_152	CMB_147	CMB_72	CMB_6	CMB_196	CMB_177	CMB_144	CMB_223	CMB_245	CMB_30	CMB_181
TCGA-02-0001	358	1	FEMALE	Mesenchymal-like	WT	WHITE	Unmethylated	NA	Gain chr 7 & loss chr 10	non-codel	1	1.23871	1.84184	1.45282	0.549183	0.501797	0.494068	0.59392	0.924097	0.758065	0.539531	0.537935	2.93517	0.763761	10.3324	0.646784	0.56014	4.0873	1.26084	0.887016	0.638403	1.009	1.56442	1.70858	17.6699	0.749829	3.3452	5.55314	6.37605	1.26585	0.696783
TCGA-02-0003	144	1	MALE	Mesenchymal-like	WT	WHITE	Unmethylated	WT	Gain chr 7 & loss chr 10	non-codel	1	1.22615	1.82317	1.43809	0.543616	0.49671	0.488665	0.587864	0.91473	0.750381	0.534062	0.532482	2.90541	0.756019	10.2276	0.640228	0.554462	4.04587	1.24806	0.878024	0.631932	0.998772	1.55869	1.69126	17.4908	0.901513	3.35313	5.51876	7.09186	1.25302	0.68972
TCGA-02-0004	345	1	MALE	NA	WT	WHITE	NA	NA	NA	NA	2	1.80586	2.68515	2.118	0.80063	0.731495	0.715679	0.862888	1.34715	1.05559	0.786559	0.784073	4.27519	1.11346	3.31535	0.942919	0.816604	5.9587	1.83813	1.29314	0.9307	1.47098	1.9957	2.49086	0.10923	0.213736	4.0635	6.90025	4.78706	1.84543	1.01581
TCGA-02-0006	558	1	FEMALE	Mesenchymal-like	WT	WHITE	Unmethylated	NA	Gain chr 7 & loss chr 10	non-codel	1	1.53961	2.28926	1.80573	0.682588	0.623691	0.613635	0.738012	1.14857	0.93238	0.670592	0.668608	3.64817	0.949292	10.6884	0.803899	0.696207	5.08018	1.56712	1.10249	0.793482	1.2541	1.94075	2.12362	0.23376	0.061711	4.1657	6.72982	8.57384	1.57334	0.866043
TCGA-02-0009	322	1	FEMALE	Classic-like	WT	WHITE	Unmethylated	NA	Gain chr 7 & loss chr 10	non-codel	2	1.60607	2.37801	1.88379	0.712096	0.650653	0.640868	0.770105	1.19823	0.961349	0.699582	0.697512	2.96308	0.990329	0.238046	0.838651	0.726304	5.29979	1.63487	1.15015	0.827784	1.30832	2.03599	2.21542	6.72013	0.393864	4.41456	7.22776	9.29075	1.64136	0.903481
TCGA-02-0011	630	1	FEMALE	LGm6-GBM	WT	WHITE	Methylated	NA	No combined CNA	non-codel	1	1.22625	1.82333	1.43821	0.543661	0.496751	0.48867	0.587948	0.914806	0.750443	0.534106	0.532526	2.90565	0.756082	10.2285	0.640281	0.554508	4.04621	1.24816	0.878097	0.631984	0.998855	1.55685	1.6914	17.4915	0.90209	3.35453	5.51922	7.09999	1.25312	0.689777
TCGA-02-0014	2512	1	MALE	G-CIMP-low	Mutant	WHITE	Unmethylated	NA	No combined CNA	non-codel	1	1.85199	2.75374	2.13993	0.821081	0.750235	0.737541	0.885147	1.38162	1.10517	0.806652	0.80421	4.38836	1.1419	15.2705	0.967005	0.837464	6.11091	1.88508	1.32617	0.954474	1.50855	1.26965	2.55416	0.196157	0.018204	1.02304	0.412814	0.571545	1.8898	1.04176
TCGA-02-0015	627	1	MALE	NA	WT	WHITE	NA	NA	Gain chr 7 & loss chr 10	non-codel	1	1.29203	1.92113	1.51535	0.572822	0.523396	0.515714	0.619485	0.963874	0.790696	0.562755	0.56109	3.06151	0.796637	10.7771	0.674625	0.584251	4.26324	1.31511	0.925197	0.665883	1.05243	1.54237	1.78212	18.4305	0.950704	3.16384	5.7865	2.59382	1.32034	0.726775
TCGA-02-0016	2648	1	MALE	NA	WT	WHITE	NA	NA	Gain chr 7 & loss chr 10	non-codel	1	1.22587	1.82275	1.43776	0.543491	0.496596	0.488768	0.587728	0.914519	0.750208	0.533939	0.532323	2.90475	0.755846	10.2253	0.640081	0.554335	4.04494	1.24777	0.877822	0.631786	0.998542	1.5514	1.69087	17.4864	0.902024	3.36565	5.51821	7.10531	1.25273	0.689561
TCGA-02-0021	2362	1	FEMALE	Mesenchymal-like	WT	WHITE	Methylated	NA	Gain chr 7 & loss chr 10	non-codel	1	1.23598	1.83778	1.44961	0.547971	0.50069	0.492761	0.59261	0.922059	0.755524	0.538341	0.536748	2.92869	0.762077	10.3096	0.645358	0.558905	4.07829	1.25806	0.885059	0.636995	1.00677	1.56419	1.70481	17.6288	0.093654	3.39658	5.55682	7.16497	1.26306	0.695246
TCGA-02-0023	612	1	FEMALE	NA	WT	WHITE	NA	NA	Gain chr 7 & loss chr 10	non-codel	2	1.95433	2.90538	2.29212	0.866452	0.791691	0.780013	0.918373	1.45475	1.15771	0.851225	0.845615	4.34108	1.205	0.625968	1.02044	0.88374	6.44859	1.98913	1.39945	1.00722	1.59191	2.36036	2.69324	0.008365	0.016388	0.804685	0.862903	10.9474	1.69232	1.09932
TCGA-02-0025	1300	1	MALE	NA	WT	WHITE	NA	NA	No combined CNA	non-codel	1	1.23942	1.8429	1.45365	0.549498	0.502085	0.49417	0.594188	0.924627	0.7585	0.539841	0.538244	2.93685	0.7642	10.3383	0.647156	0.560462	4.08965	1.26157	0.887525	0.638769	1.00958	1.55614	1.70956	17.4779	0.117778	3.39018	5.53019	7.14863	1.26658	0.697183
TCGA-02-0026	748	1	MALE	NA	Mutant	WHITE	NA	NA	No combined CNA	non-codel	1	1.46966	2.18525	1.72368	0.651574	0.595354	0.585453	0.704652	1.09639	0.883172	0.640124	0.638229	3.48241	0.90616	11.5209	0.767373	0.664575	4.84936	1.49592	1.05239	0.757429	1.19712	1.85296	2.02713	2.91073	0.010204	4.0289	6.61561	8.51963	1.50186	0.826693
TCGA-02-0027	370	1	FEMALE	LGm6-GBM	WT	WHITE	Unmethylated	NA	Gain chr 7 & loss chr 10	non-codel	1	1.25016	1.85887	1.46625	0.554259	0.506435	0.497244	0.59941	0.932639	0.765072	0.544519	0.542907	2.9623	0.770822	10.4279	0.652763	0.565318	4.12509	1.2725	0.895215	0.644304	1.01833	1.51396	1.72437	17.7296	0.047956	3.43486	5.14455	6.82937	1.27755	0.703224
TCGA-02-0033	86	1	MALE	Mesenchymal-like	WT	WHITE	Methylated	WT	Gain chr 7 & loss chr 10	non-codel	1	1.25615	1.86777	1.47327	0.556914	0.508861	0.500951	0.602024	0.937107	0.768738	0.547127	0.545508	2.97649	0.774514	10.4778	0.65589	0.568026	4.14485	1.27859	0.899504	0.647391	1.0232	1.58501	1.73263	17.897	0.049576	2.5935	5.58901	6.63617	1.28367	0.706592
TCGA-02-0034	430	1	MALE	LGm6-GBM	WT	WHITE	Unmethylated	NA	Gain chr 7 & loss chr 10	non-codel	1	1.22928	1.82783	1.44176	0.545004	0.497979	0.490633	0.589401	0.917066	0.752297	0.535426	0.533842	2.91283	0.75795	10.2537	0.641863	0.555878	4.0562	1.25125	0.880266	0.633545	1.00132	1.55068	1.69558	17.5355	0.904499	3.34632	5.29341	7.11825	1.25622	0.691481
TCGA-02-0037	110	1	FEMALE	Mesenchymal-like	WT	WHITE	Unmethylated	NA	Gain chr 7 & loss chr 10	non-codel	1	1.50412	2.23649	1.76411	0.666855	0.609315	0.59905	0.721133	1.1221	0.907056	0.655135	0.653197	3.56408	0.927411	12.2744	0.785369	0.68016	4.96308	1.531	1.07707	0.775192	1.2252	1.72485	2.07467	1.37803	0.07503	3.97218	5.84335	8.69872	1.53708	0.846081
TCGA-02-0038	326	1	FEMALE	Mesenchymal-like	WT	WHITE	Unmethylated	NA	Gain chr 7 & loss chr 10	non-codel	1	1.24532	1.85168	1.46057	0.552116	0.50444	0.495722	0.596982	0.929032	0.76018	0.542413	0.540589	2.95084	0.767841	10.3876	0.650239	0.563132	4.10913	1.26757	0.891753	0.641813	1.01439	1.5757	1.7177	17.3536	0.237954	3.07625	5.5777	7.11046	1.27261	0.700504
TCGA-02-0047	448	1	MALE	LGm6-GBM	WT	WHITE	Unmethylated	WT	No combined CNA	non-codel	1	1.22924	1.82776	1.44171	0.544984	0.49796	0.489571	0.589343	0.917032	0.752269	0.535406	0.533822	2.91273	0.757922	10.2534	0.641839	0.555857	4.05605	1.2512	0.880234	0.633522	1.00128	1.55419	1.69551	17.5255	0.869	3.37576	5.52221	6.90555	1.25617	0.691455
TCGA-02-0048	98	1	MALE	NA	WT	NA	NA	NA	No combined CNA	non-codel	1	1.28	1.90325	1.50125	0.567491	0.518525	0.509864	0.612669	0.954904	0.783299	0.557518	0.555793	3.03302	0.789223	10.6768	0.668346	0.578813	4.22356	1.30287	0.916586	0.659685	1.04264	1.61354	1.76554	18.2515	0.938219	3.48938	5.67228	3.14384	1.30805	0.720011
TCGA-02-0052	383	1	MALE	Mesenchymal-like	WT	WHITE	Unmethylated	NA	Gain chr 7 & loss chr 10	non-codel	1	1.22596	1.8229	1.43787	0.543533	0.496634	0.488447	0.587702	0.914518	0.750266	0.533981	0.532401	2.90497	0.755904	10.2261	0.640131	0.554378	4.04526	1.24787	0.87789	0.631835	0.99862	1.55641	1.691	17.4871	0.902094	3.36462	5.51684	7.10406	1.25283	0.689614
TCGA-02-0054	199	1	FEMALE	Mesenchymal-like	WT	WHITE	Methylated	NA	No combined CNA	non-codel	1	1.41583	2.10521	1.66055	0.62771	0.573548	0.563595	0.675028	1.05615	0.86617	0.616678	0.614812	3.35486	0.872971	11.8094	0.739267	0.640234	4.67174	1.44113	1.01385	0.729687	1.15328	1.7566	1.95288	11.9114	0.035573	0.768173	4.07684	7.61247	1.44017	0.796415
TCGA-02-0068	804	1	MALE	NA	WT	WHITE	NA	NA	No combined CNA	non-codel	1	1.47367	2.19121	1.72839	0.653354	0.596979	0.586922	0.706016	1.09934	0.897498	0.641872	0.639972	3.49192	0.908635	12.2599	0.769469	0.66639	4.8626	1.5	1.05527	0.759498	1.20039	1.84679	2.03267	1.83764	1.02708	4.03071	6.63023	7.7098	1.50596	0.828951
TCGA-02-0069	873	0	FEMALE	LGm6-GBM	WT	ASIAN	Methylated	NA	No combined CNA	non-codel	1	1.36809	2.03422	1.60456	0.606543	0.554207	0.545031	0.655952	1.02062	0.832914	0.595883	0.59412	3.24173	0.843533	11.0825	0.714338	0.618645	4.51421	1.39253	0.979661	0.705082	1.11439	1.72486	1.88703	9.66637	0.06281	3.75875	6.11431	7.50925	1.39806	0.769559
TCGA-02-0070	762	0	MALE	NA	WT	WHITE	NA	NA	Gain chr 7 & loss chr 10	non-codel	1	1.55575	2.31325	1.82465	0.689742	0.630228	0.620385	0.745565	1.16061	0.941879	0.677621	0.675616	3.6864	0.959241	12.1543	0.812325	0.703504	5.13342	1.58354	1.11404	0.801798	1.26725	1.84666	2.14588	0.664405	0.029599	4.12547	6.62081	6.30137	1.58983	0.87512
TCGA-02-0071	167	1	MALE	Mesenchymal-like	WT	WHITE	Unmethylated	NA	Gain chr 7 & loss chr 10	non-codel	2	1.6281	2.39394	1.90963	0.721863	0.659578	0.648323	0.780667	1.21466	0.975679	0.709177	0.706077	3.01646	1.00391	0.186938	0.850154	0.736266	5.37248	1.65729	1.16592	0.839138	1.32626	2.02132	2.24581	6.39452	1.16249	3.94116	6.62487	9.22312	1.66387	0.915874
TCGA-02-0074	310	1	FEMALE	Mesenchymal-like	WT	WHITE	Unmethylated	NA	Gain chr 7 & loss chr 10	non-codel	1	1.24308	1.84835	1.45795	0.551122	0.503568	0.495522	0.594961	0.92736	0.760742	0.541436	0.539761	2.94553	0.766458	10.3689	0.649068	0.562118	4.10173	1.26529	0.890147	0.640657	1.01256	1.54209	1.71461	17.6839	0.913159	3.0733	5.56438	6.2602	1.27032	0.699243
TCGA-02-0075	634	1	MALE	Mesenchymal-like	WT	WHITE	Methylated	NA	Gain chr 7 & loss chr 10	non-codel	1	1.50495	2.23772	1.76507	0.667221	0.60965	0.599776	0.721529	1.12272	0.91928	0.655495	0.653555	3.56603	0.92792	12.394	0.7858	0.680533	4.9658	1.53184	1.07767	0.775618	1.22587	1.90116	2.07581	0.561954	0.240245	4.13455	6.34776	8.32439	1.53792	0.846545
TCGA-02-0079	829	1	MALE	NA	WT	WHITE	NA	NA	Gain chr 7 & loss chr 10	non-codel	1	1.30478	1.94009	1.53031	0.578476	0.528563	0.520193	0.625371	0.973351	0.798501	0.56831	0.566552	3.09173	0.804501	10.8835	0.681284	0.590018	4.30532	1.3281	0.93433	0.672456	1.06282	1.65716	1.79971	13.1518	0.043814	3.57199	5.87343	7.56116	1.33337	0.73395
TCGA-02-0085	1561	1	FEMALE	Mesenchymal-like	WT	WHITE	Methylated	NA	Gain chr 7 & loss chr 10	non-codel	1	1.2263	1.8234	1.43826	0.543682	0.496771	0.489479	0.587217	0.914805	0.750472	0.534127	0.532475	2.90577	0.756112	10.2289	0.640306	0.55453	4.04636	1.24821	0.878131	0.632009	0.998894	1.55543	1.69146	17.4929	0.902341	3.37028	5.51477	7.07189	1.25317	0.689804
TCGA-02-0086	268	1	FEMALE	Mesenchymal-like	WT	WHITE	Unmethylated	NA	Gain chr 7 & loss chr 10	non-codel	1	1.30939	1.94694	1.53571	0.580518	0.530428	0.521645	0.626312	0.960945	0.801242	0.570316	0.568513	3.10264	0.80734	10.9219	0.683688	0.5921	4.32052	1.33278	0.937627	0.674829	1.06657	1.64713	1.80606	18.4162	0.963017	3.54785	5.58618	1.65844	1.33807	0.736539
TCGA-02-0099	106	1	MALE	Classic-like	WT	WHITE	Methylated	NA	Gain chr 7 & loss chr 10	non-codel	1	1.23447	1.83554	1.44785	0.547304	0.50008	0.492523	0.591888	0.920936	0.748493	0.537686	0.536095	2.92513	0.761149	10.297	0.644572	0.558224	4.07332	1.25653	0.883982	0.636219	1.00555	1.56507	1.70273	17.5556	0.605593	3.39031	5.55114	6.81671	1.26152	0.694399
TCGA-02-0258	503	1	FEMALE	NA	NA	WHITE	NA	NA	No combined CNA	non-codel	1	1.3856	2.06026	1.6251	0.614308	0.561302	0.552292	0.66435	1.03368	0.847554	0.603512	0.601726	3.28323	0.854332	11.5475	0.723484	0.626564	4.572	1.41036	0.992202	0.714108	1.12865	1.75587	1.91119	6.95236	0.837327	3.80107	6.21856	8.02342	1.41596	0.779411
TCGA-02-0266	539	1	MALE	NA	NA	NA	NA	NA	No combined CNA	non-codel	1	1.48985	2.21527	1.74737	0.660527	0.603534	0.594326	0.714247	1.11145	0.909708	0.648919	0.646999	3.53026	0.918611	11.9594	0.777917	0.673706	4.91599	1.51647	1.06685	0.767837	1.21357	1.88527	2.05498	1.29443	0.038005	4.073	6.69517	8.61181	1.52249	0.838052
TCGA-02-0269	327	1	MALE	NA	NA	WHITE	NA	NA	Gain chr 7 & loss chr 10	non-codel	2	1.58561	2.35765	1.85968	0.702982	0.642325	0.632526	0.760248	1.18289	0.966925	0.690628	0.688584	3.75707	0.977654	7.39162	0.827917	0.717008	5.23196	1.61394	1.13542	0.817188	1.29157	2.00407	2.18707	0.540055	0.158018	4.33823	7.06279	8.88574	1.62035	0.891917
TCGA-02-0281	121	1	FEMALE	NA	NA	WHITE	NA	NA	Gain chr 7 & loss chr 10	non-codel	1	1.31797	1.95969	1.54577	0.584321	0.533903	0.52568	0.63192	0.983223	0.805951	0.574052	0.572353	3.12297	0.812629	10.9935	0.688168	0.595979	4.34882	1.34151	0.943769	0.67925	1.07356	1.66193	1.8179	12.0512	0.293477	3.61668	5.90034	7.58853	1.34684	0.741365
TCGA-02-0285	422	1	FEMALE	NA	NA	WHITE	NA	NA	Gain chr 7 & loss chr 10	non-codel	1	1.23495	1.83625	1.44841	0.547516	0.500274	0.492062	0.591972	0.921292	0.755764	0.537894	0.536302	2.92626	0.761443	10.301	0.644821	0.55844	4.0749	1.25701	0.884323	0.636465	1.00594	1.5566	1.70339	17.6163	0.330994	3.38989	5.54859	7.01143	1.26201	0.694668
TCGA-02-0289	432	1	MALE	NA	NA	WHITE	NA	NA	Gain chr 7 & loss chr 10	non-codel	1	1.52901	2.2735	1.7933	0.67789	0.619399	0.609277	0.733067	1.14067	0.915035	0.665977	0.664006	3.62306	0.942758	10.2942	0.798366	0.691415	5.04521	1.55633	1.0949	0.78802	1.24547	1.93854	2.109	0.640314	0.04387	4.20192	6.8828	8.86103	1.56252	0.860082
TCGA-02-0317	372	1	MALE	NA	NA	WHITE	NA	NA	Gain chr 7 & loss chr 10	non-codel	1	1.2275	1.82517	1.43966	0.544211	0.497254	0.489165	0.588472	0.915732	0.751203	0.534647	0.533065	2.9086	0.756848	10.2388	0.64093	0.55507	4.0503	1.24943	0.878986	0.632624	0.999866	1.554	1.69311	17.5089	0.903076	3.37349	5.52121	6.98961	1.25439	0.690475
TCGA-02-0321	301	1	MALE	NA	NA	WHITE	NA	NA	Gain chr 7 & loss chr 10	non-codel	2	0.62634	0.800218	2.15217	0.813548	0.743352	0.731312	0.879767	1.36894	1.09659	0.799251	0.796886	0.158404	1.13083	0.021748	0.958134	0.829781	6.05485	1.86779	1.31401	0.945718	1.49471	2.31573	2.53105	0.179103	0.426505	5.03662	8.14408	10.6268	1.8752	1.0322
TCGA-02-0325	323	1	MALE	NA	NA	WHITE	NA	NA	Gain chr 7 & loss chr 10	non-codel	1	1.50113	2.23203	1.76059	0.665525	0.608101	0.598647	0.71974	1.11986	0.917164	0.653829	0.651894	3.55697	0.925562	12.3295	0.783804	0.678804	4.95319	1.52795	1.07493	0.773647	1.22275	1.89149	2.07053	0.456669	0.03031	4.12137	6.7322	8.51165	1.53401	0.844394
TCGA-02-0326	223	1	FEMALE	NA	NA	WHITE	NA	NA	No combined CNA	non-codel	2	1.9418	2.25786	2.30055	0.869636	0.7946	0.782765	0.940363	1.46332	1.17116	0.854353	0.851825	0.120023	1.20942	0.061965	1.02419	0.886988	6.47229	1.99633	1.4046	1.01092	1.59776	1.85901	2.70555	0.062126	0.031324	4.58116	7.44557	5.0801	2.00448	1.10336
TCGA-02-0330	484	1	FEMALE	NA	NA	BLACK OR AFRICAN AMERICAN	NA	NA	Gain chr 7 & loss chr 10	non-codel	1	1.47608	2.1948	1.73122	0.654423	0.597956	0.588963	0.707733	1.10118	0.900307	0.642922	0.641019	3.49763	0.910121	12.2678	0.770728	0.66748	4.87056	1.50246	1.05699	0.76074	1.20236	1.87334	2.03599	0.727103	1.06041	4.05689	6.6281	8.54822	1.50842	0.830307
TCGA-02-0332	782	1	FEMALE	NA	NA	WHITE	NA	NA	Gain chr 7 & loss chr 10	non-codel	1	1.22822	1.82624	1.44051	0.544531	0.497546	0.489991	0.588781	0.916269	0.751644	0.534961	0.533378	2.9103	0.757292	10.2448	0.641306	0.555395	4.05268	1.25016	0.879502	0.632995	1.00045	1.53207	1.6941	17.5202	0.903713	3.37025	5.38055	7.11386	1.25513	0.69088
TCGA-02-0333	133	1	FEMALE	NA	NA	WHITE	NA	NA	No combined CNA	non-codel	1	1.5038	2.236	1.76372	0.666709	0.609139	0.599404	0.720932	1.12186	0.908532	0.654992	0.652966	3.5633	0.927209	11.5066	0.785198	0.680012	4.962	1.53066	1.07684	0.775023	1.22493	1.89093	2.07422	0.439175	0.699128	4.12156	6.60983	8.68977	1.53674	0.845896
TCGA-02-0337	764	1	MALE	NA	NA	WHITE	NA	NA	Gain chr 7 & loss chr 10	non-codel	1	1.2306	1.8298	1.44331	0.54559	0.498514	0.490836	0.590034	0.918051	0.752529	0.536002	0.534416	2.91596	0.758765	10.2648	0.642553	0.556476	4.06056	1.25259	0.881213	0.634227	1.0024	1.56024	1.6974	17.5543	0.526233	3.37695	5.53015	7.13203	1.25757	0.692224
TCGA-02-0338	322	1	MALE	NA	NA	WHITE	NA	NA	No combined CNA	non-codel	1	1.51646	2.25483	1.77858	0.672324	0.614313	0.604852	0.727093	1.1313	0.90459	0.660509	0.658554	3.57594	0.935017	0.921203	0.791811	0.685739	5.00379	1.54356	1.08591	0.78155	1.23524	1.91872	2.09169	10.5406	0.317582	4.16756	6.82452	8.73941	1.54969	0.85302
TCGA-02-0339	377	1	MALE	NA	NA	WHITE	NA	NA	No combined CNA	non-codel	1	1.4673	2.18173	1.72091	0.650527	0.594397	0.585458	0.703477	1.09458	0.894561	0.639095	0.637204	3.47682	0.904704	12.2275	0.76614	0.663507	4.84156	1.49351	1.0507	0.756212	1.1952	1.80129	2.02387	2.84662	1.04636	3.34143	5.94698	8.3495	1.49944	0.825365
TCGA-02-0422	441	1	MALE	NA	NA	WHITE	NA	NA	No combined CNA	non-codel	1	1.22572	1.82254	1.43759	0.543426	0.496536	0.489248	0.587658	0.91441	0.750118	0.533875	0.532296	2.9044	0.755755	10.2241	0.640004	0.554268	4.04446	1.24762	0.877717	0.631711	0.998422	1.55854	1.69067	17.4847	0.901915	3.3665	5.51755	7.10553	1.25258	0.689478
TCGA-02-0430	321	1	FEMALE	NA	NA	WHITE	NA	NA	Gain chr 7 & loss chr 10	non-codel	1	1.23555	1.83715	1.44911	0.547782	0.500517	0.492338	0.592405	0.92174	0.756131	0.538155	0.536563	2.92768	0.761813	10.306	0.645135	0.558711	4.07688	1.25762	0.884753	0.636775	1.00643	1.56948	1.70422	17.6248	0.200315	3.39599	5.55744	7.08179	1.26262	0.695005
TCGA-02-0432	1433	1	MALE	NA	NA	WHITE	NA	NA	No combined CNA	non-codel	1	1.48113	2.2023	1.73714	0.656659	0.6	0.590152	0.708286	1.10495	0.906074	0.645119	0.64321	3.50959	0.913232	12.3401	0.773362	0.669761	4.8872	1.50759	1.06061	0.76334	1.20646	1.88299	2.04295	2.01835	0.500217	4.06729	6.66724	7.52798	1.51358	0.833145
TCGA-02-0439	20	1	FEMALE	NA	NA	WHITE	NA	NA	NA	NA	1	1.52005	2.26017	1.78279	0.673915	0.615767	0.60606	0.728813	1.13398	0.92267	0.662072	0.660113	3.60181	0.93723	9.19331	0.793684	0.687361	5.01563	1.54721	1.08848	0.783399	1.23817	1.91947	2.09663	1.76725	0.539007	4.17693	6.82909	8.8104	1.55335	0.855039
TCGA-02-0440	345	1	MALE	NA	NA	WHITE	NA	NA	Gain chr 7 & loss chr 10	non-codel	1	1.22874	1.82702	1.44112	0.544762	0.497758	0.489876	0.589139	0.916659	0.751819	0.535188	0.533317	2.91154	0.757614	10.2492	0.641578	0.555631	4.0544	1.25069	0.879876	0.633264	1.00088	1.55151	1.69482	17.3938	0.902946	3.37161	5.51204	7.05391	1.25566	0.691174
TCGA-02-0446	282	1	MALE	NA	NA	WHITE	NA	NA	Gain chr 7 & loss chr 10	non-codel	2	1.6572	0.021825	2.08687	0.788862	0.720795	0.708912	0.849684	1.32735	1.06827	0.774998	0.762438	3.57297	0.925464	0.029211	0.92906	0.804601	5.87112	1.81111	1.27414	0.91702	1.44936	2.24666	2.45425	0.168957	0.064642	4.68965	7.99859	10.3121	1.8183	1.00088
TCGA-02-0451	493	1	FEMALE	NA	NA	WHITE	NA	NA	Gain chr 7 & loss chr 10	non-codel	1	1.22669	1.82397	1.43872	0.543853	0.496927	0.489453	0.58812	0.915129	0.750708	0.534295	0.532714	2.90668	0.756349	10.2321	0.640507	0.554704	4.04764	1.2486	0.878407	0.632207	0.999207	1.55133	1.69199	17.4984	0.898133	3.35262	5.47841	7.10286	1.25356	0.690021
TCGA-06-0122	187	1	FEMALE	Classic-like	WT	WHITE	Unmethylated	WT	Gain chr 7 & loss chr 10	non-codel	2	2.04559	3.0095	2.40099	0.907606	0.829294	0.814602	0.979682	1.52721	1.22505	0.891655	0.889017	0.8522	1.26223	0.139007	1.06891	0.925715	6.75488	2.08373	1.46592	1.05506	1.66752	2.1877	2.82368	0.138965	0.037612	4.30909	1.22103	6.25418	2.09164	1.15154
TCGA-06-0124	620	1	MALE	Mesenchymal-like	WT	WHITE	Methylated	WT	Gain chr 7 & loss chr 10	non-codel	1	1.24077	1.84491	1.45524	0.550097	0.502632	0.494782	0.594727	0.925635	0.759327	0.54043	0.53883	2.94005	0.765033	10.3496	0.647861	0.561073	4.09411	1.26294	0.888492	0.639466	1.01068	1.54642	1.71142	17.6993	0.050525	3.40729	5.35778	7.08882	1.26796	0.697943
TCGA-06-0125	1448	1	FEMALE	Classic-like	WT	WHITE	Methylated	WT	No combined CNA	non-codel	1	1.23773	1.84039	1.45167	0.548748	0.5014	0.494004	0.590368	0.923329	0.757465	0.539104	0.5374	2.93284	0.763157	10.3242	0.646273	0.559697	4.08407	1.25984	0.886313	0.637898	1.0082	1.57381	1.70722	17.6559	0.910749	3.38951	5.57159	6.26695	1.26485	0.696231
TCGA-06-0126	211	1	MALE	Classic-like	WT	WHITE	Unmethylated	WT	Gain chr 7 & loss chr 10	non-codel	1	1.52429	2.26648	1.73235	0.675796	0.617485	0.607127	0.723212	1.13692	0.932836	0.663919	0.661687	3.61186	0.939846	12.7145	0.7959	0.68928	5.02963	1.55153	1.09143	0.785586	1.22265	0.857068	1.02602	21.7437	0.027119	0.130766	0.069977	0.256053	0.002416	0.857425
TCGA-06-0127	121	1	MALE	NA	WT	WHITE	NA	NA	No combined CNA	non-codel	1	1.54825	2.30211	1.81587	0.68642	0.627193	0.617034	0.741883	1.15502	0.937887	0.674357	0.672316	3.66865	0.954621	10.0505	0.808412	0.700116	5.1087	1.57592	1.10868	0.797936	1.26114	1.95418	2.13554	0.446831	0.047781	4.12913	6.82429	8.56846	1.58218	0.870905
TCGA-06-0128	691	1	MALE	G-CIMP-low	Mutant	WHITE	Methylated	WT	No combined CNA	non-codel	1	1.58688	2.35954	1.86117	0.703545	0.64284	0.632614	0.75607	1.18347	0.962355	0.691181	0.689136	3.76017	0.978437	12.3636	0.828581	0.717583	5.23615	1.61523	1.13634	0.817844	1.29261	1.75542	2.18882	0.058381	0.016524	4.28286	6.15788	5.68237	1.62165	0.892632
TCGA-06-0129	1024	1	MALE	G-CIMP-low	Mutant	ASIAN	Methylated	Mutant	No combined CNA	non-codel	1	1.4257	2.11989	1.67138	0.632087	0.577548	0.567859	0.681573	1.06356	0.872502	0.620979	0.619141	3.37826	0.879058	11.8921	0.744423	0.644698	4.70432	1.45118	1.02092	0.734776	1.16132	1.54639	1.9665	20.3374	0.089685	1.51603	1.05291	0.958612	1.45681	0.801969
TCGA-06-0130	394	1	MALE	Mesenchymal-like	WT	WHITE	Unmethylated	WT	No combined CNA	non-codel	2	2.10557	2.43033	2.47038	0.933833	0.852887	0.839253	1.00824	1.56104	1.24521	0.917422	0.913288	1.59633	1.2987	0.114619	1.0998	0.952465	6.95007	2.14394	1.50829	1.08554	1.71571	1.94139	2.90527	0.035776	0.025706	1.82701	3.62446	4.15715	2.15245	1.18481
TCGA-06-0133	435	1	MALE	Mesenchymal-like	WT	WHITE	Unmethylated	NA	Gain chr 7 & loss chr 10	non-codel	2	1.79734	2.37019	2.12167	0.802019	0.732765	0.719836	0.866187	1.34949	1.07024	0.787925	0.785222	0.165946	1.11539	0.05067	0.944556	0.818022	5.96905	1.84132	1.29539	0.932316	1.47353	2.14133	2.49518	0.049191	0.018573	4.95407	8.07159	9.79475	1.84863	1.01757
TCGA-06-0137	812	1	FEMALE	Classic-like	WT	WHITE	Unmethylated	WT	Gain chr 7 & loss chr 10	non-codel	1	1.25619	1.86783	1.47331	0.556931	0.508877	0.500966	0.602153	0.937136	0.768761	0.547144	0.545414	2.97658	0.774538	10.4782	0.65591	0.568043	4.14497	1.27863	0.899531	0.647411	1.02324	1.53174	1.73268	17.9192	0.924331	2.97353	5.43685	5.56821	1.28371	0.706614
TCGA-06-0138	737	1	MALE	NA	WT	WHITE	NA	NA	Gain chr 7 & loss chr 10	non-codel	2	1.75068	2.6031	2.05328	0.776165	0.709194	0.697451	0.839341	1.30604	1.04595	0.762524	0.760268	4.14727	1.07943	4.26716	0.914106	0.791651	5.77662	1.78196	1.25363	0.902261	1.42603	2.1124	2.41475	0.15151	0.088693	3.23378	3.28865	10.0723	1.78903	0.984769
TCGA-06-0139	362	1	MALE	LGm6-GBM	WT	WHITE	Unmethylated	WT	No combined CNA	non-codel	1	1.23196	1.83181	1.4449	0.546192	0.498919	0.491738	0.590685	0.919064	0.753936	0.536593	0.535005	2.91918	0.759602	10.2761	0.643262	0.557089	4.06504	1.25397	0.882184	0.634926	1.0035	1.56637	1.69927	17.5737	0.906506	3.38216	5.53842	6.74115	1.25895	0.692988
TCGA-06-0141	313	1	MALE	LGm6-GBM	WT	WHITE	Unmethylated	WT	No combined CNA	non-codel	2	1.61429	2.40029	1.89331	0.715695	0.653942	0.64335	0.770782	1.20414	0.984412	0.703118	0.700848	3.82511	0.995335	8.64546	0.84289	0.729975	5.32658	1.64313	1.15596	0.831967	1.31493	2.03649	2.22662	0.148936	0.137356	4.38198	7.22788	6.52949	1.64966	0.908048
TCGA-06-0143	357	1	MALE	Mesenchymal-like	WT	WHITE	Unmethylated	NA	No combined CNA	non-codel	1	1.26279	1.87766	1.48106	0.559861	0.511554	0.502861	0.602287	0.941917	0.772805	0.550022	0.548394	2.99224	0.778612	10.5333	0.65936	0.571031	4.16678	1.28536	0.904263	0.650816	1.02862	1.60168	1.7418	18.0135	0.279087	2.10943	5.67444	6.36649	1.29046	0.710331
TCGA-06-0145	71	1	FEMALE	Classic-like	WT	WHITE	Methylated	WT	Gain chr 7 & loss chr 10	non-codel	1	1.30023	1.93332	1.52497	0.576458	0.526718	0.518682	0.623226	0.969992	0.795714	0.566327	0.564651	3.08094	0.801694	10.8455	0.678907	0.587959	4.2903	1.32346	0.931069	0.670109	1.05911	1.59611	1.79343	18.5475	0.179381	3.49767	5.78438	2.4432	1.32872	0.731388
TCGA-06-0147	541	1	FEMALE	Mesenchymal-like	WT	WHITE	Methylated	NA	No combined CNA	non-codel	1	1.25425	1.86495	1.47104	0.556073	0.508092	0.500635	0.601371	0.935691	0.767576	0.5463	0.544684	2.97199	0.773344	10.462	0.654899	0.567168	4.13858	1.27438	0.898144	0.646413	1.02166	1.50517	1.73001	17.8916	0.922906	3.44026	3.44019	7.24665	1.28173	0.705525
TCGA-06-0148	307	1	MALE	Mesenchymal-like	WT	BLACK OR AFRICAN AMERICAN	Unmethylated	NA	No combined CNA	non-codel	1	1.22706	1.82453	1.43916	0.544019	0.497079	0.4891	0.588192	0.915409	0.749141	0.534459	0.532877	2.90757	0.756581	10.2352	0.640703	0.554874	4.04887	1.24899	0.878676	0.632401	0.999513	1.56021	1.69251	17.5038	0.902793	3.3277	5.51855	7.05579	1.25395	0.690232
TCGA-06-0152	375	1	MALE	NA	WT	WHITE	NA	WT	Gain chr 7 & loss chr 10	non-codel	1	1.22586	1.82274	1.43775	0.543487	0.496592	0.489303	0.587724	0.914513	0.750203	0.533936	0.532356	2.90473	0.75584	10.2252	0.640076	0.554331	4.04491	1.24777	0.877816	0.631782	0.998535	1.55872	1.69086	17.4867	0.902017	3.35342	5.51817	7.10598	1.25272	0.689556
TCGA-06-0154	424	1	MALE	NA	WT	WHITE	NA	WT	Gain chr 7 & loss chr 10	non-codel	1	1.29386	1.92385	1.5175	0.573633	0.524137	0.515572	0.618997	0.965239	0.791815	0.563552	0.561808	3.06584	0.797765	10.7924	0.67558	0.585078	4.26928	1.31698	0.926506	0.666825	1.05392	1.57931	1.78464	18.1606	0.65231	3.55572	5.67872	2.75705	1.32221	0.727804
TCGA-06-0156	178	1	MALE	NA	Mutant	WHITE	NA	NA	NA	NA	1	1.71182	2.54531	2.0077	0.758935	0.693451	0.682821	0.820207	1.27704	1.04118	0.745597	0.742037	4.05621	1.05547	13.7151	0.893814	0.774078	5.64839	1.7424	1.2258	0.882232	1.39437	1.79826	2.36114	0.221699	0.037129	2.93761	2.7537	3.37063	1.74932	0.962909
TCGA-06-0157	97	1	FEMALE	NA	WT	WHITE	NA	WT	Gain chr 7 & loss chr 10	non-codel	2	1.77765	2.6432	2.08491	0.788122	0.720119	0.70731	0.848054	1.32615	1.0744	0.774271	0.721473	4.2121	1.09606	8.23581	0.928188	0.803847	5.86561	1.80941	1.27294	0.91616	1.44701	2.09975	2.45195	0.028184	0.012004	0.379008	5.34596	6.3936	1.81509	0.99994
TCGA-06-0158	329	1	MALE	NA	WT	WHITE	NA	WT	No combined CNA	non-codel	2	2.72146	4.36218	0.236858	1.34237	1.22646	1.1916	1.4174	0.63988	1.78989	1.29954	1.31417	0.439074	1.86687	0.074332	1.58059	0.996049	1.67735	2.91356	0.098798	1.56037	0.138157	0.396823	0.004094	0.004254	0.015276	0.015595	0.009061	0.133838	0.000234	1.70315
TCGA-06-0166	178	1	MALE	NA	WT	WHITE	NA	WT	Gain chr 7 & loss chr 10	non-codel	1	1.62659	2.41858	1.90774	0.721149	0.658925	0.648157	0.779704	1.21341	0.981336	0.708475	0.706379	3.85426	1.00292	13.1952	0.849313	0.735537	5.36716	1.65565	1.16477	0.838307	1.32495	1.99069	2.24358	0.322649	0.018152	3.49626	2.64937	6.90132	1.66218	0.914967
TCGA-06-0168	598	1	FEMALE	NA	WT	WHITE	NA	WT	Gain chr 7 & loss chr 10	non-codel	1	1.22945	1.82808	1.44196	0.54508	0.498048	0.490486	0.589483	0.917194	0.752402	0.535501	0.533916	2.91324	0.758056	10.2552	0.641953	0.555956	4.05677	1.25142	0.880389	0.633634	1.00146	1.55817	1.69581	17.5379	0.89447	3.1462	5.53039	7.07459	1.25639	0.691577
TCGA-06-0169	100	1	MALE	Mesenchymal-like	WT	WHITE	Unmethylated	WT	Gain chr 7 & loss chr 10	non-codel	2	0.925112	0.079601	2.9166	1.10273	1.00729	0.98478	1.15067	1.85547	1.45105	1.08335	0.618116	0.026551	0.891744	0.014371	1.29871	1.12473	8.20711	2.53171	1.78108	1.28188	2.02602	2.27978	3.42673	0.016534	0.011655	1.28261	0.277643	1.34731	1.31998	1.39903
TCGA-06-0171	399	1	MALE	NA	WT	WHITE	NA	WT	Gain chr 7 & loss chr 10	non-codel	1	1.24625	1.85306	1.46166	0.552527	0.504852	0.497442	0.597464	0.929724	0.762681	0.542817	0.541211	2.95304	0.768412	10.3953	0.650723	0.563551	4.11219	1.26852	0.892417	0.642291	1.01514	1.58457	1.71898	17.7775	0.917021	3.40635	5.60996	5.56506	1.27356	0.701026
TCGA-06-0173	136	1	FEMALE	NA	WT	WHITE	NA	WT	Gain chr 7 & loss chr 10	non-codel	1	1.293	1.92257	1.51649	0.573252	0.523789	0.51451	0.619836	0.964484	0.791289	0.563178	0.561511	3.06381	0.797235	10.7852	0.675131	0.58469	4.26644	1.3161	0.925891	0.666383	1.05322	1.28614	1.78346	18.444	0.075826	3.48587	5.50641	3.63331	1.32133	0.727321
TCGA-06-0174	98	1	MALE	NA	WT	WHITE	NA	WT	Gain chr 7 & loss chr 10	non-codel	1	1.37228	2.04045	1.60947	0.6084	0.555905	0.546982	0.65772	1.02374	0.839806	0.597708	0.595538	3.25166	0.846117	11.4465	0.716527	0.620539	4.52803	1.3968	0.982661	0.707241	1.1178	1.47851	1.89076	19.5753	1.00951	2.18298	0.281297	3.77513	1.38281	0.771916
TCGA-06-0176	2768	0	MALE	NA	WT	ASIAN	NA	NA	No combined CNA	non-codel	1	1.48826	2.21291	1.7455	0.659822	0.60289	0.593561	0.713529	1.11027	0.908607	0.648227	0.646178	3.52649	0.917631	12.3647	0.777087	0.672987	4.91074	1.51485	1.06572	0.767017	1.21227	1.87493	2.05279	1.6414	0.131629	4.0687	6.65446	7.9156	1.52087	0.837158
TCGA-06-0178	2681	1	MALE	NA	Mutant	WHITE	NA	WT	No combined CNA	non-codel	1	1.23348	1.83407	1.44668	0.546865	0.499679	0.492128	0.591268	0.920197	0.754865	0.537254	0.535664	2.92278	0.760538	10.2888	0.644054	0.557776	4.07005	1.25552	0.883272	0.635708	1.00474	1.56096	1.70137	17.5953	0.571289	3.34091	5.48743	6.97455	1.26051	0.693842
TCGA-06-0184	2126	1	MALE	NA	WT	WHITE	NA	WT	Gain chr 7 & loss chr 10	non-codel	1	1.3002	1.93328	1.52494	0.576446	0.526708	0.517567	0.622071	0.969934	0.794555	0.566315	0.56464	3.08088	0.801677	10.8449	0.678893	0.587947	4.29021	1.32343	0.93105	0.670095	1.05909	1.63036	1.7934	13.6182	0.090085	3.5163	5.7199	7.48092	1.32869	0.731373
TCGA-06-0185	2246	0	MALE	NA	WT	WHITE	NA	WT	Gain chr 7 & loss chr 10	non-codel	2	2.07224	3.08123	2.43042	0.918731	0.839398	0.822645	0.99254	1.54593	1.25366	0.902585	0.899611	4.86188	1.2777	1.80638	1.08201	0.937061	6.83767	2.10927	1.48389	1.06799	1.68796	2.05768	2.85774	0.169913	0.020304	2.1628	0.401981	2.50945	2.10915	1.16565
TCGA-06-0187	828	1	MALE	NA	WT	WHITE	NA	NA	No combined CNA	non-codel	1	1.3241	1.96881	1.55296	0.58704	0.536387	0.527389	0.633542	0.987721	0.810282	0.576723	0.575016	3.1375	0.81641	11.0446	0.691369	0.598753	4.36906	1.34776	0.948161	0.68241	1.07855	1.67948	1.82635	16.1607	0.008588	3.47868	5.94603	3.54322	1.35311	0.744814
TCGA-06-0188	1356	1	MALE	NA	WT	WHITE	NA	WT	Gain chr 7 & loss chr 10	non-codel	1	1.22576	1.82259	1.43763	0.543442	0.496551	0.489263	0.587568	0.914437	0.750141	0.533892	0.53206	2.90449	0.755778	10.2244	0.640024	0.554285	4.04458	1.24766	0.877744	0.63173	0.998453	1.55859	1.69072	17.4852	0.901943	3.36779	5.517	7.10539	1.25262	0.689499
TCGA-06-0189	469	1	MALE	NA	WT	WHITE	NA	WT	No combined CNA	non-codel	1	1.3291	1.97624	1.55883	0.589256	0.538412	0.529848	0.637219	0.991528	0.813341	0.5789	0.577187	3.14934	0.819492	11.0855	0.69398	0.601013	4.38555	1.35284	0.95174	0.684987	1.08262	1.64011	1.83325	12.2928	0.057111	3.53686	5.56398	7.45485	1.35822	0.747626
TCGA-06-0190	317	1	MALE	NA	WT	WHITE	NA	WT	Gain chr 7 & loss chr 10	non-codel	2	1.74305	2.59175	2.04433	0.772781	0.706102	0.694411	0.835478	1.29835	1.04077	0.7592	0.756699	4.1296	1.07473	4.4754	0.910122	0.7882	5.75144	1.77414	1.24816	0.898328	1.41981	2.11494	2.40422	0.239049	0.019951	3.43386	4.14676	9.11806	1.78124	0.980476
TCGA-06-0192	1185	1	MALE	NA	WT	WHITE	NA	WT	Gain chr 7 & loss chr 10	non-codel	2	1.57799	2.34632	1.85074	0.699601	0.639237	0.629808	0.756546	1.1772	0.950951	0.687307	0.685227	3.73887	0.972952	4.33327	0.823936	0.71356	5.2068	1.60618	1.12997	0.813259	1.28536	2.00497	2.17655	2.64153	1.14323	4.33715	7.10325	9.1439	1.61256	0.887628
TCGA-06-0195	225	1	MALE	NA	WT	WHITE	NA	WT	Gain chr 7 & loss chr 10	non-codel	1	1.22743	1.82508	1.43959	0.544183	0.497228	0.48993	0.588153	0.915684	0.751163	0.534619	0.533037	2.90844	0.756808	10.2383	0.640896	0.55504	4.05009	1.24936	0.87894	0.632591	0.999813	1.55597	1.69302	17.509	0.903172	3.35872	5.40551	7.11507	1.25432	0.690439
TCGA-06-0197	169	1	FEMALE	NA	WT	WHITE	NA	NA	Gain chr 7 & loss chr 10	non-codel	1	1.22703	1.82448	1.43912	0.544007	0.497067	0.489771	0.587567	0.915387	0.75092	0.534446	0.532865	2.9075	0.756563	10.235	0.640688	0.554861	4.04878	1.24896	0.878655	0.632386	0.99949	1.56017	1.69247	17.5034	0.90288	3.27238	5.52345	7.10486	1.25392	0.690216
TCGA-06-0201	12	1	FEMALE	NA	WT	WHITE	NA	NA	Gain chr 7 & loss chr 10	non-codel	1	1.25521	1.86638	1.47217	0.556498	0.508481	0.501017	0.599919	0.771949	0.768162	0.546718	0.5451	2.97426	0.773935	10.47	0.655399	0.567601	4.12741	1.27719	0.89883	0.646906	1.021	1.59603	1.73133	17.9053	0.923611	1.2398	5.65027	7.26837	1.28271	0.706064
TCGA-06-0206	233	1	MALE	NA	WT	WHITE	NA	NA	Gain chr 7 & loss chr 10	non-codel	1	1.2312	1.83068	1.44401	0.545855	0.498756	0.491436	0.590249	0.918498	0.753472	0.536262	0.53464	2.91738	0.759134	10.2698	0.642866	0.556746	4.06254	1.2532	0.881641	0.634535	1.00289	1.56547	1.69819	17.5629	0.905948	3.28317	5.53284	6.81237	1.24891	0.692561
TCGA-06-0208	256	1	FEMALE	NA	WT	WHITE	NA	NA	Gain chr 7 & loss chr 10	non-codel	1	1.2553	1.86651	1.47227	0.556536	0.508516	0.500537	0.601431	0.936471	0.768216	0.546756	0.545138	2.97447	0.773988	10.4707	0.655445	0.567641	4.14203	1.27772	0.898893	0.646951	1.02251	1.51411	1.73145	17.9062	0.724681	3.02992	5.15759	6.05991	1.2828	0.706113
TCGA-06-0209	232	1	MALE	NA	WT	WHITE	NA	WT	Gain chr 7 & loss chr 10	non-codel	1	1.23745	1.83998	1.45135	0.548627	0.501289	0.493242	0.593319	0.923162	0.757298	0.538985	0.53739	2.9322	0.762989	10.3219	0.64613	0.559573	4.08317	1.25957	0.886118	0.637757	1.00798	1.56008	1.70685	17.652	0.019642	3.40068	5.52288	7.16557	1.26457	0.696078
TCGA-06-0210	225	1	FEMALE	NA	WT	WHITE	NA	WT	Gain chr 7 & loss chr 10	non-codel	1	1.49727	2.22631	1.75607	0.663818	0.606541	0.59698	0.713858	1.11699	0.915688	0.652152	0.650222	3.54785	0.923187	12.4751	0.781793	0.677062	4.94048	1.52403	1.07217	0.771662	1.21962	1.42456	2.06522	4.19491	0.024843	4.05255	6.5895	5.48167	1.53008	0.842227
TCGA-06-0211	360	1	MALE	NA	WT	WHITE	NA	WT	Gain chr 7 & loss chr 10	non-codel	2	1.83533	1.83706	2.16378	0.817937	0.747362	0.735419	0.884513	1.37632	1.08451	0.803563	0.800753	1.15806	1.13752	0.039086	0.963303	0.834257	6.08751	1.87786	1.3211	0.95082	1.50278	2.29499	2.5447	0.15332	0.078087	4.66407	7.52172	8.39553	1.88532	1.03777
TCGA-06-0213	16	1	FEMALE	NA	WT	WHITE	NA	Mutant	No combined CNA	non-codel	1	1.28562	1.9116	1.50784	0.569981	0.5208	0.512817	0.615998	0.959094	0.786774	0.559964	0.558307	3.04632	0.792686	10.7237	0.671279	0.581353	4.24209	1.30852	0.920608	0.66258	1.04721	1.58518	1.77328	18.3391	0.945951	3.50236	5.58345	2.84934	1.31379	0.723171
TCGA-06-0214	457	1	MALE	NA	WT	WHITE	NA	WT	Gain chr 7 & loss chr 10	non-codel	1	1.23434	1.83535	1.44769	0.547246	0.500027	0.492326	0.591789	0.920838	0.755391	0.537628	0.536038	2.92481	0.761068	10.2959	0.644503	0.558165	4.07289	1.25639	0.883887	0.636151	1.00544	1.54795	1.70255	17.6076	0.908256	3.38749	5.5285	6.50686	1.26138	0.694325
TCGA-06-0216	735	1	FEMALE	NA	WT	WHITE	NA	WT	Gain chr 7 & loss chr 10	non-codel	1	1.27867	1.90126	1.49968	0.566899	0.517984	0.510119	0.612929	0.953908	0.78252	0.556936	0.555288	3.02985	0.7884	10.6657	0.667649	0.57821	4.21916	1.30151	0.91563	0.658997	1.04155	1.60496	1.76369	18.2343	0.04142	2.45861	5.6821	5.15475	1.30668	0.71926
TCGA-06-0219	22	1	MALE	NA	WT	WHITE	NA	WT	No combined CNA	non-codel	1	1.36826	2.03447	1.59145	0.606619	0.554277	0.543897	0.647739	1.0195	0.837347	0.595958	0.594034	3.24214	0.843639	11.413	0.714428	0.618722	4.51477	1.39214	0.979784	0.70517	1.11453	0.961629	1.88727	19.5179	0.036995	3.74099	3.92903	0.511754	1.3982	0.769656
TCGA-06-0221	603	1	MALE	NA	Mutant	WHITE	NA	Mutant	No combined CNA	non-codel	1	1.37802	2.04898	1.6162	0.610945	0.55823	0.549309	0.660309	1.02802	0.843318	0.600208	0.598432	3.26526	0.849655	11.4944	0.719523	0.623134	4.54697	1.40264	0.986771	0.710199	1.12247	1.53822	1.90072	19.6571	0.010749	1.93822	2.51304	2.32236	1.40793	0.775144
TCGA-06-0237	415	1	FEMALE	NA	WT	WHITE	NA	WT	Gain chr 7 & loss chr 10	non-codel	2	1.6459	2.44731	1.9304	0.729714	0.666751	0.655084	0.788675	1.22787	0.982674	0.71689	0.714238	3.89955	1.01483	6.28279	0.8594	0.744273	5.43091	1.67531	1.1786	0.848263	1.34068	2.04393	2.27023	0.047016	0.357833	3.78187	7.0368	8.24592	1.68197	0.925834
TCGA-06-0238	405	1	MALE	NA	WT	WHITE	NA	WT	Gain chr 7 & loss chr 10	non-codel	2	2.07108	0.446565	2.58908	1.01416	0.926524	0.907696	1.09155	1.70316	1.33585	0.996342	0.964046	0.021938	1.40995	0.041917	1.1944	1.0344	7.54794	2.32174	1.63803	1.17893	1.8633	1.9435	3.15519	0.01368	0.021971	4.27274	2.08166	0.751176	2.33762	1.28673
TCGA-06-0241	1481	1	FEMALE	NA	WT	WHITE	NA	WT	Gain chr 7 & loss chr 10	non-codel	2	1.63681	0.345727	1.30703	1.09608	1.00129	0.980147	1.17683	1.792	1.45237	1.07682	1.0438	0.018796	1.52232	0.038925	1.29088	1.11795	8.14822	2.28957	1.77035	1.27415	2.01381	1.15945	3.40991	0.007314	0.025371	2.12468	0.53878	0.131478	2.50037	1.39067
TCGA-06-0644	384	1	MALE	NA	WT	BLACK OR AFRICAN AMERICAN	NA	WT	Gain chr 7 & loss chr 10	non-codel	2	2.0428	3.03614	2.3959	0.905679	0.827353	0.81389	0.97808	1.52319	1.19289	0.889762	0.856015	4.44097	1.25955	0.687217	1.06664	0.923749	6.74053	2.07912	1.46281	1.05282	1.66392	2.08738	2.81762	0.073072	0.027512	0.84674	0.871931	7.19888	2.06829	1.14909
TCGA-06-0645	175	1	FEMALE	NA	WT	WHITE	NA	WT	Gain chr 7 & loss chr 10	non-codel	2	0.107055	0.008327	2.77935	1.05063	0.9597	0.936516	1.12358	1.76759	1.37868	1.03217	0.977747	0.00781	0.07298	0.008768	1.23735	1.07159	7.81934	2.40904	1.69693	1.22132	1.93016	2.61845	3.26857	0.047702	0.016826	1.45059	1.73094	4.00463	1.85825	1.3321
TCGA-06-0646	175	1	MALE	NA	WT	WHITE	NA	WT	Gain chr 7 & loss chr 10	non-codel	1	1.5474	2.30084	1.81486	0.686041	0.626846	0.616421	0.741881	1.15438	0.935147	0.673984	0.671627	3.66662	0.954093	9.82512	0.807965	0.699729	5.10587	1.57505	1.10806	0.797495	1.26045	1.94204	2.13436	0.226227	0.071528	4.10985	6.92794	8.96213	1.5813	0.870423
TCGA-06-0648	298	1	MALE	NA	WT	WHITE	NA	WT	Gain chr 7 & loss chr 10	non-codel	2	1.78081	2.6454	2.08862	0.789524	0.721296	0.708986	0.849354	1.32825	1.06943	0.775649	0.773354	3.53064	1.09801	0.448536	0.92984	0.805277	5.87605	1.81263	1.2752	0.91779	1.45057	2.21892	2.45631	0.040117	0.116765	4.86614	7.88116	6.99127	1.81983	1.00172
TCGA-06-0649	64	1	FEMALE	NA	WT	BLACK OR AFRICAN AMERICAN	NA	WT	Gain chr 7 & loss chr 10	non-codel	2	2.2202	3.28956	1.72393	0.984358	0.899358	0.885376	1.06246	1.65629	1.31174	0.967059	0.907878	3.17152	1.36897	0.418469	1.1593	1.004	7.32611	2.25994	1.58989	1.14428	1.80854	0.916072	3.05745	0.080311	0.308724	4.43208	0.243235	0.214164	2.25032	1.24892
TCGA-06-0686	432	1	MALE	NA	WT	WHITE	NA	WT	Gain chr 7 & loss chr 10	non-codel	2	0.274158	0.183002	2.85858	1.08641	0.992528	0.970493	1.17491	1.82779	1.46058	1.06732	1.06373	0.003975	1.48068	0.020626	1.27949	1.10809	8.08565	2.49424	1.75473	1.26291	1.99503	2.00444	3.34149	0.092018	0.077519	0.735998	0.163995	1.12058	2.41435	1.37833
TCGA-06-0743	803	1	MALE	NA	WT	WHITE	NA	WT	Gain chr 7 & loss chr 10	non-codel	1	1.2882	1.91543	1.51086	0.571123	0.521806	0.510486	0.615647	0.960978	0.78835	0.561086	0.559162	3.05243	0.794274	10.7452	0.672624	0.582518	4.25059	1.31121	0.922452	0.663908	1.04931	1.43298	1.77683	18.3758	0.010162	3.50616	5.68934	3.81742	1.31642	0.72462
TCGA-06-0744	1426	1	MALE	NA	WT	WHITE	NA	WT	Gain chr 7 & loss chr 10	non-codel	1	1.28553	1.91146	1.50773	0.56994	0.520688	0.512178	0.615766	0.959026	0.784911	0.559924	0.556347	3.04611	0.79263	10.7222	0.671231	0.581312	4.24179	1.3085	0.920543	0.662533	1.04714	1.62393	1.77316	14.6435	0.011676	3.42627	5.77773	7.38068	1.31369	0.723119
TCGA-06-0745	239	1	MALE	NA	WT	WHITE	NA	WT	Gain chr 7 & loss chr 10	non-codel	2	0.37971	0.062977	2.29723	0.868381	0.793339	0.781348	0.938834	1.46103	1.15863	0.85312	0.850367	0.031516	0.888519	0.00997	1.02271	0.885708	6.46295	1.99344	1.40257	1.00946	1.59546	2.14307	2.70164	0.150578	0.057171	4.30725	7.93396	8.88002	2.00159	1.1016
TCGA-06-0747	82	1	MALE	NA	WT	WHITE	NA	WT	No combined CNA	non-codel	1	1.55025	2.30508	1.81821	0.687305	0.628002	0.617376	0.743294	1.15651	0.929424	0.675227	0.673183	3.67329	0.955852	6.70368	0.809454	0.701019	5.11528	1.57795	1.1101	0.798965	1.26277	1.96034	2.13829	3.27605	0.094545	4.25602	6.73319	8.90781	1.58422	0.872028
TCGA-06-0749	82	1	MALE	NA	WT	BLACK OR AFRICAN AMERICAN	NA	WT	Gain chr 7 & loss chr 10	non-codel	2	2.24509	3.10978	2.63523	0.996647	0.910652	0.893862	1.07514	1.6769	1.3324	0.979132	0.969848	0.594722	1.38606	0.121861	1.17377	1.01653	7.41757	2.28815	1.60974	1.15856	1.83112	1.95418	3.10069	0.035169	0.090268	1.69653	1.67526	1.0436	2.29718	1.26451
TCGA-06-0750	28	1	MALE	NA	WT	WHITE	NA	WT	Gain chr 7 & loss chr 10	non-codel	1	1.22957	1.82826	1.4421	0.545132	0.49806	0.490785	0.587811	0.914797	0.752474	0.535552	0.533535	2.91352	0.758129	10.2562	0.642014	0.556009	4.05716	1.24992	0.880474	0.633695	1.00156	1.56344	1.69598	17.5396	0.904748	3.35864	5.53344	6.89267	1.25651	0.691644
TCGA-06-0875	1322	0	FEMALE	LGm6-GBM	WT	WHITE	Unmethylated	WT	Gain chr 7 & loss chr 10	non-codel	2	2.36965	3.01491	2.49298	1.06367	0.971753	0.951795	1.14695	1.787	1.45327	1.04498	1.00471	0.186178	1.47927	0.124877	1.25271	1.08489	7.9164	2.44203	1.71799	1.23648	1.95419	1.93648	3.27576	0.011108	0.017686	0.920874	0.12454	0.579172	1.19473	1.34955
TCGA-06-0876	1405	0	FEMALE	Mesenchymal-like	WT	BLACK OR AFRICAN AMERICAN	Methylated	WT	Gain chr 7 & loss chr 10	non-codel	2	1.45067	1.49309	2.63691	0.997109	0.911074	0.890454	1.07787	1.67478	1.33585	0.979585	0.970626	0.024187	1.38657	0.034508	1.17432	1.017	7.421	2.27136	1.61049	1.1591	1.83177	1.86609	3.10213	0.059201	0.022256	0.886172	3.05134	3.53487	2.2983	1.2651
TCGA-06-0877	204	1	MALE	Classic-like	WT	WHITE	Methylated	WT	Gain chr 7 & loss chr 10	non-codel	2	1.74035	2.5744	2.04134	0.771651	0.705019	0.692121	0.833542	1.29844	1.02849	0.75809	0.746772	2.17929	1.07315	0.190721	0.908791	0.787048	5.74303	1.7716	1.24634	0.897014	1.41774	2.20504	2.4007	0.44321	0.674277	4.70352	7.8251	9.72517	1.77863	0.979043
TCGA-06-0878	218	0	MALE	Mesenchymal-like	WT	WHITE	Unmethylated	WT	Gain chr 7 & loss chr 10	non-codel	1	1.43898	2.13963	1.68771	0.637974	0.582927	0.573527	0.688933	1.0735	0.880628	0.626762	0.624908	3.40972	0.887246	12.0029	0.751356	0.650703	4.74814	1.46469	1.03043	0.741619	1.17209	1.34187	1.98397	20.5188	0.024821	0.668448	0.288125	2.10423	1.36897	0.809438
TCGA-06-0879	1229	1	MALE	Classic-like	WT	WHITE	Methylated	WT	Gain chr 7 & loss chr 10	non-codel	2	2.24365	1.01696	2.77753	1.05041	0.959571	0.944442	1.13237	1.76751	1.38838	1.03195	1.01849	0.061712	1.46077	0.040867	1.23709	1.07137	7.81772	2.41159	1.69658	1.22106	1.9299	2.57919	3.24104	0.036184	0.020998	1.71539	0.164134	1.93864	0.262041	1.33272
TCGA-06-0881	504	1	MALE	LGm6-GBM	WT	WHITE	Unmethylated	WT	No combined CNA	non-codel	1	1.23221	1.83218	1.44519	0.546301	0.499163	0.491801	0.589684	0.919067	0.754087	0.5367	0.535076	2.91976	0.759754	10.2781	0.64339	0.557201	4.06585	1.25412	0.882361	0.635053	1.00371	1.54141	1.69961	17.5772	0.906687	3.2803	5.41861	6.97782	1.25921	0.693126
TCGA-06-0882	632	1	MALE	LGm6-GBM	WT	WHITE	Unmethylated	WT	Gain chr 7 & loss chr 10	non-codel	1	1.50829	2.24269	1.67436	0.668702	0.610915	0.59744	0.718757	1.12516	0.923043	0.65695	0.648644	3.57395	0.929979	12.581	0.787545	0.682044	4.97683	1.53524	1.08006	0.777339	1.22536	0.863489	2.01635	21.5128	0.019089	0.201666	0.08357	0.354731	0.489509	0.848424
TCGA-06-1084	728	1	MALE	Mesenchymal-like	WT	BLACK OR AFRICAN AMERICAN	Methylated	NA	Gain chr 7 & loss chr 10	non-codel	1	1.26339	1.87855	1.48177	0.560127	0.51176	0.504284	0.605237	0.845852	0.773172	0.550283	0.547286	2.99366	0.778982	10.5383	0.659674	0.571303	4.16875	1.28552	0.904692	0.651125	1.02911	1.60644	1.74263	18.022	0.929634	3.44817	5.68712	4.41929	1.29107	0.710668
TCGA-06-1086	208	1	MALE	NA	NA	BLACK OR AFRICAN AMERICAN	Unmethylated	NA	No combined CNA	non-codel	2	1.66292	2.46067	1.95035	0.737256	0.673643	0.66317	0.797217	1.24056	0.973348	0.7243	0.722157	3.17966	1.02532	0.274192	0.868283	0.751966	5.48705	1.69263	1.19078	0.857031	1.35454	2.11211	2.2937	3.67513	0.100886	4.54999	7.46706	9.63703	1.69935	0.935404
TCGA-06-1087	123	1	MALE	Mesenchymal-like	WT	WHITE	Unmethylated	NA	Gain chr 7 & loss chr 10	non-codel	2	1.87553	0.766437	2.48735	0.940249	0.859058	0.840671	1.00709	1.57462	1.25687	0.923725	0.918321	0.023962	1.3075	0.037958	1.10735	0.959009	6.95993	2.15842	1.51865	1.093	1.72638	2.55543	2.92231	0.005902	0.027773	0.497948	1.8664	12.0258	0.054986	1.19295
TCGA-06-1800	815	1	MALE	Mesenchymal-like	WT	WHITE	Methylated	NA	Gain chr 7 & loss chr 10	non-codel	1	1.31757	1.95911	1.54531	0.584146	0.533744	0.523285	0.630227	0.98293	0.806173	0.573881	0.571797	3.12203	0.812387	10.9902	0.687962	0.595802	4.34752	1.34111	0.943488	0.679047	1.07308	1.54033	1.81735	18.7949	0.036331	0.378406	4.83534	5.61376	1.34644	0.741143
TCGA-06-1801	360	1	FEMALE	LGm6-GBM	WT	WHITE	Unmethylated	NA	Gain chr 7 & loss chr 10	non-codel	2	0.847864	0.329119	2.75783	1.04302	0.95302	0.936068	1.12571	1.75499	1.39928	1.02469	1.02034	0.008133	1.41864	0.016425	1.22838	1.06383	7.76267	2.39461	1.68463	1.21246	1.91631	2.15742	3.24413	0.566154	0.09484	2.60354	0.659031	1.35173	2.26279	1.32327
TCGA-06-1802	466	1	MALE	NA	NA	WHITE	Methylated	NA	Gain chr 7 & loss chr 10	non-codel	1	1.65009	2.45353	0.310399	0.731568	0.668445	0.653269	0.777678	0.142258	1.00982	0.717262	0.71615	3.90995	1.01741	13.7638	0.853271	0.746165	3.67708	1.41722	1.08875	0.850419	0.453581	0.536738	0.013827	23.5382	0.012995	0.025686	0.013664	0.078333	0.005383	0.928187
TCGA-06-1805	1031	0	FEMALE	G-CIMP-low	Mutant	WHITE	Unmethylated	NA	No combined CNA	non-codel	2	0.802907	0.115253	2.25466	0.85229	0.778694	0.764561	0.919129	1.43323	1.1371	0.837312	0.834778	0.012164	1.16435	0.013423	1.00376	0.869295	6.34319	1.95673	1.37658	0.990753	1.56589	2.36536	2.65158	0.01584	0.016733	4.92195	7.78357	8.95197	1.9645	1.08135
TCGA-06-5408	357	1	FEMALE	Mesenchymal-like	WT	WHITE	Unmethylated	WT	Gain chr 7 & loss chr 10	non-codel	2	0.00137	0.007318	2.53922	0.960143	0.877235	0.860742	1.0369	1.61517	1.28017	0.94327	0.838286	0.030936	0.000428	0.003428	1.13078	0.979301	7.14589	2.20435	1.55078	1.11613	1.76405	2.70091	2.98713	0.18441	0.05305	5.2407	9.67882	1.2416	2.2131	0.003345
TCGA-06-5410	108	1	FEMALE	LGm6-GBM	WT	WHITE	Methylated	WT	No combined CNA	non-codel	2	2.12084	3.15349	2.268	0.940275	0.859082	0.84585	1.00724	1.58218	1.27095	0.923751	0.919589	4.98894	1.30766	1.57584	1.10738	0.959036	6.99802	2.15873	1.51869	1.09303	1.72755	0.841191	2.92525	0.021945	0.064632	3.77017	0.691043	0.272261	2.166	1.19299
TCGA-06-5411	254	1	MALE	Mesenchymal-like	WT	WHITE	Unmethylated	WT	Gain chr 7 & loss chr 10	non-codel	2	0.207554	0.045791	2.34341	0.88584	0.809347	0.794833	0.957943	1.49052	1.19205	0.870272	0.864537	0.035977	0.750705	0.011288	1.04327	0.903515	6.59288	2.03376	1.43077	1.02975	1.62753	2.49909	2.75596	0.053147	0.037092	4.52044	4.37272	10.7131	2.04183	1.12269
TCGA-06-5412	138	1	FEMALE	Mesenchymal-like	WT	WHITE	Methylated	WT	No combined CNA	non-codel	2	0.200227	0.132755	2.94951	1.13358	1.0357	1.01555	1.22016	1.90723	1.52512	1.11366	1.10647	0.003953	1.33587	0.014473	1.33504	1.1562	8.43671	2.60246	1.83091	1.31774	2.0806	1.38859	3.48238	0.134935	0.026782	0.404235	0.192325	0.433946	0.455125	1.4378
TCGA-06-5413	268	0	MALE	Classic-like	WT	WHITE	Unmethylated	WT	Gain chr 7 & loss chr 10	non-codel	2	0.121885	0.015784	2.51865	0.95208	0.86993	0.854708	1.02863	1.60185	1.28055	0.935348	0.930504	0.071104	0.02669	0.009555	1.12129	0.971076	7.08587	2.18583	1.53776	1.10675	1.74917	2.63338	2.96204	0.056281	0.023101	0.969566	7.86208	5.79815	2.19439	1.17129
TCGA-06-5414	273	0	MALE	Classic-like	WT	WHITE	Unmethylated	WT	Gain chr 7 & loss chr 10	non-codel	2	0.091123	0.019725	2.22005	0.839208	0.766797	0.754322	0.90746	1.41212	1.13229	0.824459	0.821853	0.497193	0.216755	0.004945	0.988353	0.855952	6.24582	1.9267	1.35545	0.975545	1.54185	2.38949	2.61088	0.01176	0.025221	5.18661	8.24071	10.6908	1.93435	1.05877
TCGA-06-5415	260	0	MALE	Classic-like	WT	WHITE	Unmethylated	WT	Gain chr 7 & loss chr 10	non-codel	2	0.080521	0.020443	2.30065	0.869674	0.794634	0.781132	0.940001	1.46332	1.17046	0.85439	0.851862	0.170039	0.008157	0.005157	1.02423	0.887026	6.47256	1.99664	1.40466	1.01096	1.59783	2.43355	2.70566	0.232449	0.01157	3.08247	7.24019	11.3662	2.00457	1.10289
TCGA-06-5416	204	0	FEMALE	NA	NA	WHITE	Unmethylated	NA	No combined CNA	non-codel	2	0.158473	0.056718	2.55978	0.968643	0.884872	0.866313	1.04633	1.62991	1.30225	0.95162	0.934341	0.005458	0.465935	0.0098	1.14079	0.98797	7.20915	2.22386	1.56451	1.12601	1.77966	1.66697	3.01357	0.352067	0.017055	5.17855	6.51159	1.74683	2.23269	1.19352
TCGA-06-5417	155	0	FEMALE	NA	Mutant	WHITE	Methylated	Mutant	NA	NA	2	0.009122	0.014808	2.44336	0.926723	0.846761	0.830536	1.00215	1.55931	1.24737	0.910437	0.907743	0.037832	0.111095	0.006867	1.09142	0.945213	6.89715	2.12737	1.4968	1.07728	1.70264	2.08396	2.88315	1.51597	0.487344	5.72859	9.0211	1.00026	2.13607	0.95501
TCGA-06-5418	83	1	FEMALE	Mesenchymal-like	WT	WHITE	Unmethylated	WT	Gain chr 7 & loss chr 10	non-codel	2	0.004835	0.011421	2.96834	1.1221	1.02521	1.00697	1.21306	1.88783	1.50574	1.10238	1.09704	0.000699	0.00393	0.00486	1.32152	1.14449	8.35125	2.57617	1.81237	1.3044	2.051	2.38053	3.45259	1.02409	0.016253	0.152005	0.224264	2.93424	0.284313	0.059199
TCGA-06-5856	114	1	MALE	Classic-like	WT	WHITE	Unmethylated	WT	Gain chr 7 & loss chr 10	non-codel	2	0.106885	0.008369	2.63632	0.996561	0.910573	0.891282	1.07379	1.37501	1.33347	0.979047	0.974702	0.007691	0.121153	0.006915	1.17367	1.01644	7.41692	2.27492	1.6096	1.15846	1.83096	2.22146	3.10042	0.019194	0.004908	3.76159	5.17842	2.63612	2.29704	1.19079
TCGA-06-5858	187	0	FEMALE	LGm6-GBM	WT	WHITE	Unmethylated	Mutant	No combined CNA	non-codel	2	1.93719	2.87928	2.27203	0.858854	0.784749	0.77096	0.928761	1.44517	1.14921	0.843761	0.834115	4.04954	1.19443	0.566165	1.01149	0.87599	6.39204	1.9718	1.38718	0.998384	1.57795	1.80912	2.672	0.068965	0.009562	5.118	4.12875	3.86921	1.97963	1.08968
TCGA-06-5859	139	0	MALE	Classic-like	WT	WHITE	Unmethylated	WT	Gain chr 7 & loss chr 10	non-codel	2	0.011246	0.067646	2.46103	0.930301	0.85003	0.83571	1.0059	1.5654	1.25224	0.913952	0.907314	0.010226	0.031722	0.00639	1.09564	0.948863	6.92378	2.13583	1.50258	1.08144	1.70922	2.59164	2.89428	0.081875	0.013724	1.01782	7.5882	8.77074	2.14376	0.551186
TCGA-06-6388	159	1	FEMALE	Mesenchymal-like	WT	WHITE	Unmethylated	Mutant	Gain chr 7 & loss chr 10	non-codel	2	1.72154	2.55977	2.0191	0.763246	0.69739	0.684531	0.82537	1.2843	1.03807	0.749833	0.747463	4.07859	1.06146	3.33693	0.898891	0.778474	5.68047	1.7522	1.23276	0.887243	1.40229	2.10634	2.37455	0.629113	0.031294	3.86267	7.71919	6.80043	1.75926	0.968378
TCGA-06-6389	237	0	FEMALE	G-CIMP-high	Mutant	WHITE	Methylated	WT	No combined CNA	non-codel	2	0.027695	0.011609	2.83539	1.07479	0.982054	0.96487	1.1622	1.80831	1.45483	1.0559	1.05221	0.003309	0.005876	0.007171	1.26581	1.09624	7.99916	2.46756	1.73596	1.2494	1.97469	2.6061	3.34381	0.157349	0.014437	2.27768	2.13971	0.688482	2.47729	0.30487
TCGA-06-6390	164	1	MALE	Mesenchymal-like	WT	WHITE	Unmethylated	WT	Gain chr 7 & loss chr 10	non-codel	2	1.99778	2.97052	2.34309	0.885719	0.80912	0.792325	0.952546	0.63269	1.2133	0.870153	0.847331	4.73365	1.23179	8.14679	1.04307	0.903391	6.50713	2.02675	1.43057	1.02961	1.41963	2.16965	2.74973	0.045631	0.006428	0.044072	0.648665	5.09487	0.038109	1.12377
TCGA-06-6391	45	1	FEMALE	LGm6-GBM	WT	WHITE	Unmethylated	Mutant	No combined CNA	non-codel	2	0.006845	0.009496	2.9112	1.10052	1.00549	0.987534	1.18552	1.85175	1.48937	1.08118	1.05094	0.001497	0.000438	0.003792	1.29611	1.12248	8.19067	2.52664	1.77752	1.27931	2.02196	2.62494	3.42278	0.195587	0.029814	1.97252	0.626868	2.12361	2.24176	0.002509
TCGA-08-0244	690	1	MALE	NA	WT	WHITE	NA	NA	Gain chr 7 & loss chr 10	non-codel	1	1.62526	2.41661	0.14336	0.72056	0.658387	0.6462	0.763786	1.21247	0.994626	0.697519	0.705802	3.85111	1.0021	13.5567	0.84862	0.731938	5.36278	1.6543	0.595452	0.837527	0.719513	0.303939	0.017135	21.9981	0.015032	0.024981	0.023749	0.077335	0.000183	0.91422
TCGA-08-0245	1151	1	FEMALE	NA	WT	BLACK OR AFRICAN AMERICAN	NA	NA	No combined CNA	non-codel	1	1.26134	1.8755	1.47936	0.559218	0.510966	0.50221	0.604366	0.940983	0.771917	0.54939	0.547727	2.9888	0.777718	10.5212	0.658603	0.570376	4.16199	1.28388	0.903224	0.650068	1.02744	1.58891	1.7398	17.7903	0.111988	3.20553	5.64723	5.73109	1.28898	0.709515
TCGA-08-0246	127	1	FEMALE	NA	WT	WHITE	NA	NA	No combined CNA	non-codel	1	1.47865	2.19861	1.73423	0.65556	0.598995	0.589034	0.708833	1.10305	0.899403	0.644039	0.642133	3.50371	0.911703	12.206	0.772067	0.66864	4.87902	1.50507	1.05883	0.762062	1.20444	1.86472	2.03953	1.72903	0.592932	3.59705	6.53178	8.53623	1.51104	0.83175
TCGA-08-0344	3524	1	MALE	NA	Mutant	WHITE	NA	NA	No combined CNA	codel	1	1.22578	1.82263	1.43766	0.543452	0.496561	0.488985	0.587723	0.914455	0.750155	0.533902	0.532322	2.90454	0.755792	10.2246	0.640036	0.554296	4.04466	1.24769	0.87776	0.631742	0.998472	1.55708	1.69075	17.4856	0.90196	3.36581	5.51782	7.10588	1.25264	0.689512
TCGA-08-0345	53	1	FEMALE	NA	WT	NA	NA	NA	Gain chr 7 & loss chr 10	non-codel	2	0.201437	0.027002	1.82838	1.01378	0.926243	0.905748	1.07574	1.6975	1.35048	0.995968	0.983577	0.009329	0.849821	0.013376	1.19396	1.03401	7.54377	2.3275	1.63742	1.17848	1.8626	0.566134	3.15401	0.00321	0.027049	5.77541	6.02128	0.23857	2.33674	1.28585
TCGA-08-0346	256	1	MALE	NA	WT	NA	NA	NA	Gain chr 7 & loss chr 10	non-codel	1	1.69225	2.51621	1.98162	0.750259	0.685524	0.673826	0.811327	1.26244	1.03339	0.737074	0.732563	4.00984	1.0434	13.0463	0.883597	0.765229	5.58382	1.72248	1.21179	0.872147	1.37843	1.38304	2.33415	0.11646	0.209295	4.1749	5.96748	0.99567	1.72932	0.951901
TCGA-08-0347	782	1	MALE	NA	WT	NA	NA	NA	Gain chr 7 & loss chr 10	non-codel	1	1.22569	1.82249	1.43755	0.543411	0.496523	0.489092	0.587678	0.914386	0.750098	0.533861	0.532246	2.90432	0.755735	10.2238	0.639987	0.554254	4.04435	1.24759	0.877694	0.631694	0.998396	1.5585	1.69062	17.4828	0.90182	3.36889	5.51741	7.10535	1.25255	0.68946
TCGA-08-0348	370	1	MALE	NA	WT	WHITE	NA	NA	Gain chr 7 & loss chr 10	non-codel	1	1.60145	2.38121	0.475229	0.710006	0.648697	0.634577	0.74453	0.752364	0.974804	0.697106	0.669993	3.7947	0.987422	13.3581	0.836189	0.724172	5.24905	1.61332	1.14672	0.825354	0.334523	0.603993	0.022768	21.3635	1.15976	0.017817	0.180335	0.234641	0.000755	0.900829
TCGA-08-0349	298	1	MALE	NA	WT	NA	NA	NA	Gain chr 7 & loss chr 10	non-codel	1	1.30337	1.938	1.52866	0.577852	0.527993	0.518868	0.624734	0.972339	0.797487	0.567697	0.566017	3.08839	0.803633	10.8718	0.680549	0.589382	4.30068	1.32666	0.933322	0.671731	1.06167	1.50117	1.79777	15.8207	0.032296	3.57546	5.63956	5.31658	1.33193	0.733158
TCGA-08-0350	889	1	MALE	NA	WT	WHITE	NA	NA	No combined CNA	non-codel	1	1.22575	1.82257	1.43761	0.543435	0.496545	0.48879	0.587525	0.914426	0.750131	0.533885	0.532305	2.90445	0.755768	10.2242	0.640015	0.554278	4.04453	1.24765	0.877732	0.631722	0.99844	1.55731	1.6907	17.4846	0.901931	3.36803	5.51765	7.10422	1.2526	0.68949
TCGA-08-0351	1987	1	MALE	NA	WT	WHITE	NA	NA	No combined CNA	non-codel	1	1.81746	2.7024	2.08748	0.805775	0.736249	0.723685	0.867262	1.35586	1.11113	0.791614	0.789271	4.30655	1.12061	14.8698	0.948978	0.821852	5.99699	1.84994	1.30145	0.936681	1.48043	1.26163	2.50687	0.416521	0.031607	2.12032	1.09394	0.492579	1.85665	1.02234
TCGA-08-0352	39	1	MALE	NA	WT	WHITE	NA	NA	Gain chr 7 & loss chr 10	non-codel	1	1.43929	2.14009	1.68807	0.638111	0.58301	0.572555	0.675675	1.07336	0.880818	0.626897	0.625042	3.41046	0.887437	12.0055	0.751518	0.650843	4.74916	1.46497	1.03065	0.741779	1.17138	1.76471	1.96362	20.5312	0.729806	0.229701	0.756788	2.20312	0.117327	0.809612
TCGA-08-0353	256	1	MALE	NA	WT	WHITE	NA	NA	Gain chr 7 & loss chr 10	non-codel	1	1.22833	1.82641	1.44064	0.544581	0.497592	0.489893	0.588943	0.916354	0.751533	0.53501	0.533427	2.91057	0.757362	10.2458	0.641365	0.555447	4.05305	1.25028	0.879583	0.633054	1.00055	1.56182	1.69426	17.3869	0.836804	3.37614	5.51957	7.12028	1.25524	0.690944
TCGA-08-0354	546	1	FEMALE	NA	WT	WHITE	NA	NA	Gain chr 7 & loss chr 10	non-codel	1	1.71561	2.55094	2.01214	0.760615	0.694986	0.681619	0.817751	1.27987	1.04735	0.747248	0.745037	4.06519	1.05781	14.2575	0.895793	0.775791	5.66089	1.74626	1.22851	0.884185	1.39746	1.85837	2.36637	0.684885	0.020534	1.66475	2.34104	3.87981	1.75319	0.96504
TCGA-08-0355	747	1	FEMALE	NA	WT	WHITE	NA	NA	No combined CNA	non-codel	1	1.32459	1.96955	1.55355	0.58726	0.536589	0.526734	0.632189	0.98813	0.810625	0.57694	0.575232	3.13868	0.816717	11.0488	0.691629	0.598977	4.3707	1.34822	0.948517	0.682667	1.07896	1.5634	1.82704	18.5785	0.1141	3.62735	5.70266	1.20218	1.35362	0.745094
TCGA-08-0356	946	1	FEMALE	NA	WT	WHITE	NA	NA	Gain chr 7 & loss chr 10	non-codel	1	1.23378	1.83451	1.44703	0.546997	0.499799	0.492319	0.591483	0.920419	0.755048	0.537384	0.535794	2.92348	0.760721	10.2912	0.64421	0.557911	4.07103	1.25582	0.883485	0.635862	1.00498	1.5277	1.70178	17.4973	0.583172	3.35957	5.40672	7.13849	1.26081	0.694009
TCGA-08-0357	1143	1	MALE	NA	WT	WHITE	NA	NA	Gain chr 7 & loss chr 10	non-codel	1	1.71463	2.5495	2.01085	0.760185	0.694593	0.683242	0.82211	1.27914	1.04716	0.746825	0.744615	4.06289	1.05721	13.9903	0.895286	0.775352	5.65769	1.74527	1.22782	0.883684	1.39667	1.73025	2.36503	0.701423	0.032978	2.13124	3.79485	2.36227	1.7522	0.964494
TCGA-08-0358	678	1	MALE	NA	WT	WHITE	NA	NA	Gain chr 7 & loss chr 10	non-codel	1	1.26809	1.88553	1.48727	0.562208	0.513699	0.506158	0.60797	0.946015	0.776045	0.552328	0.550694	3.00478	0.781877	10.5774	0.662125	0.573426	4.18425	1.29075	0.908054	0.653545	1.03293	1.61237	1.7491	18.089	0.933089	2.81008	5.70789	4.56794	1.29587	0.713309
TCGA-08-0359	103	1	FEMALE	NA	WT	WHITE	NA	NA	Gain chr 7 & loss chr 10	non-codel	2	2.22889	3.26844	2.61799	0.990473	0.905011	0.889764	1.06749	1.66658	1.34364	0.973067	0.970188	0.920258	1.37748	0.108732	1.1665	1.01024	7.37162	2.27398	1.59977	1.15139	1.81977	2.38352	3.08142	0.070726	0.027251	1.0493	1.44821	1.28082	2.28144	1.25668
TCGA-08-0360	468	1	MALE	NA	WT	WHITE	NA	NA	NA	NA	1	1.29566	1.92652	1.51961	0.57443	0.524866	0.515492	0.616822	0.964987	0.792916	0.564335	0.562665	3.07011	0.798874	10.8074	0.676519	0.585892	4.27521	1.31877	0.927795	0.667753	1.05539	1.62951	1.78713	18.4716	0.952197	3.49512	5.8259	2.17715	1.32404	0.728816
TCGA-08-0373	134	1	MALE	NA	WT	NA	NA	NA	NA	NA	2	2.3703	3.52435	2.76806	1.05088	0.960132	0.936804	1.12447	0.85828	1.4294	1.03241	1.02824	5.47919	1.46148	2.36648	1.23764	1.07184	7.81838	2.22263	1.6874	1.2216	1.75662	0.886398	0.250728	0.019964	0.042842	0.115037	0.026922	0.81086	0.008854	1.33331
TCGA-08-0375	372	1	FEMALE	NA	WT	NA	NA	NA	Gain chr 7 & loss chr 10	non-codel	1	1.23208	1.83198	1.44504	0.546242	0.49911	0.490593	0.590632	0.919149	0.754006	0.536643	0.535055	2.91945	0.759672	10.277	0.643321	0.557141	4.06542	1.25409	0.882266	0.634985	1.0036	1.55121	1.69943	17.2574	0.808464	3.3676	5.5346	7.1088	1.25907	0.693052
TCGA-08-0380	454	1	FEMALE	NA	WT	NA	NA	NA	Gain chr 7 & loss chr 10	non-codel	1	1.22958	1.82827	1.44211	0.545136	0.4981	0.490068	0.587635	0.917288	0.75248	0.535556	0.533971	2.91354	0.758134	10.2562	0.642019	0.556013	4.05719	1.25155	0.88048	0.633699	1.00157	1.55765	1.69599	17.5383	0.90317	3.37008	5.53456	6.84302	1.25652	0.691649
TCGA-08-0385	82	1	MALE	NA	WT	NA	NA	NA	NA	NA	2	1.85205	2.74755	2.17261	0.821276	0.750412	0.738367	0.885574	1.38194	1.11515	0.806843	0.804455	1.49621	1.14217	0.232481	0.967234	0.837662	6.11236	1.88553	1.32649	0.9547	1.50891	2.28135	2.55509	0.34557	0.036763	4.80866	6.45583	7.42545	1.89301	1.042
TCGA-08-0386	548	1	MALE	NA	WT	WHITE	NA	WT	Gain chr 7 & loss chr 10	non-codel	1	1.54476	2.29691	1.80249	0.68487	0.625776	0.615369	0.734642	1.14735	0.945316	0.672834	0.670209	3.66036	0.952465	12.8852	0.806586	0.698534	5.09716	1.57136	1.10617	0.796134	1.21029	1.09567	2.12918	18.509	0.04832	0.094771	0.645097	0.647224	0.022102	0.868937
TCGA-08-0389	467	1	MALE	NA	WT	NA	NA	NA	Gain chr 7 & loss chr 10	non-codel	1	1.83343	2.72614	2.1375	0.812853	0.742716	0.730526	0.876545	1.36777	1.11526	0.798568	0.796205	4.34438	1.13045	13.6422	0.957314	0.829071	6.04967	1.86619	1.31288	0.944909	1.49343	1.08126	2.52824	0.180631	0.124065	3.51585	0.438439	0.644278	1.76361	1.03132
TCGA-08-0390	425	1	MALE	NA	WT	WHITE	NA	NA	Gain chr 7 & loss chr 10	non-codel	1	1.22654	1.82375	1.43854	0.543787	0.496866	0.489465	0.588084	0.915017	0.750617	0.53423	0.532074	2.90633	0.756257	10.2308	0.640429	0.554636	4.04714	1.24831	0.8783	0.63213	0.999086	1.55807	1.69179	17.4862	0.902479	3.37082	5.51187	7.06499	1.25341	0.689936
TCGA-08-0392	22	1	MALE	NA	WT	WHITE	NA	NA	Gain chr 7 & loss chr 10	non-codel	1	1.22675	1.82407	1.43879	0.543882	0.496954	0.488545	0.587577	0.915178	0.750749	0.534324	0.532743	2.90684	0.75639	10.2326	0.640542	0.554734	4.04786	1.24867	0.878455	0.632242	0.999262	1.55349	1.69209	17.4983	0.902638	3.34878	5.5168	7.06695	1.25363	0.690058
TCGA-08-0509	382	1	MALE	NA	NA	BLACK OR AFRICAN AMERICAN	NA	NA	Gain chr 7 & loss chr 10	non-codel	1	1.93132	2.87169	0.000299	0.856251	0.782201	0.748145	0.906203	0.001824	1.18193	0.001125	0.551653	4.57633	1.19081	16.1096	0.000572	0.00046	0.736661	1.67324	0.011857	0.035256	1.5e-05	0.030184	0.000112	27.2359	0.193822	0.000469	0.009085	0.003805	7.8e-05	1.08638
TCGA-08-0510	130	1	MALE	NA	NA	WHITE	NA	NA	Gain chr 7 & loss chr 10	non-codel	2	0.001933	0.009799	3.18928	1.32629	1.21185	1.18776	1.3914	0.641958	1.76433	1.30298	0.923917	0.00026	0.002175	0.006116	1.56095	1.34934	9.49154	3.04435	2.14085	1.54176	0.190006	1.09487	0.907093	0.006312	0.064566	0.016823	0.07864	0.309526	0.00169	0.013145
TCGA-08-0511	235	1	MALE	NA	NA	WHITE	NA	NA	NA	NA	1	1.22689	1.82427	1.43895	0.543941	0.497008	0.489281	0.587964	0.915277	0.75083	0.534382	0.532801	2.90715	0.756472	10.2338	0.640612	0.554794	4.04829	1.24881	0.87855	0.63231	0.99937	1.55046	1.69227	17.4973	0.902699	3.34562	5.51524	7.06843	1.25377	0.690133
TCGA-08-0512	1282	1	MALE	NA	NA	WHITE	NA	NA	No combined CNA	non-codel	1	1.2533	1.86353	1.46992	0.555649	0.507596	0.499446	0.598234	0.934758	0.766992	0.545885	0.510165	2.96973	0.772755	10.454	0.654401	0.566736	4.1336	1.27224	0.897461	0.645921	1.02088	1.59224	1.7287	17.8773	0.921689	1.99136	5.6413	7.07667	1.28075	0.704988
TCGA-08-0514	337	1	FEMALE	NA	NA	WHITE	NA	NA	No combined CNA	non-codel	1	1.22698	1.82441	1.43906	0.543983	0.497046	0.488816	0.588297	0.915348	0.750888	0.534423	0.532842	2.90738	0.756531	10.2346	0.640661	0.554837	4.04861	1.2489	0.878618	0.632359	0.999447	1.549	1.6924	17.4354	0.902302	3.37118	5.51459	7.10636	1.25386	0.690186
TCGA-08-0516	596	1	MALE	NA	NA	WHITE	NA	NA	No combined CNA	non-codel	1	1.23278	1.83303	1.44586	0.546554	0.499395	0.491198	0.590536	0.919674	0.754437	0.536949	0.53536	2.92112	0.760106	10.2829	0.643689	0.557459	4.06774	1.25481	0.88277	0.635348	1.00417	1.56715	1.7004	17.5839	0.907108	3.32843	5.54932	6.63657	1.25979	0.693448
TCGA-08-0517	1785	1	FEMALE	NA	NA	WHITE	NA	NA	No combined CNA	non-codel	1	1.28088	1.90456	1.50228	0.567881	0.518882	0.51029	0.612941	0.955561	0.783838	0.557901	0.556251	3.0351	0.789766	10.6842	0.668806	0.579212	4.22647	1.30377	0.917217	0.660139	1.04335	1.59296	1.76675	18.2577	0.014732	2.07662	5.73697	5.3903	1.30895	0.720507
TCGA-08-0518	588	1	FEMALE	NA	NA	WHITE	NA	NA	Gain chr 7 & loss chr 10	non-codel	1	1.23229	1.8323	1.44529	0.546337	0.499197	0.49187	0.59041	0.919309	0.754138	0.536736	0.535148	2.91996	0.759805	10.2788	0.643434	0.557238	4.06613	1.25431	0.88242	0.635096	1.00377	1.56689	1.69972	17.5784	0.906748	3.07596	5.54062	6.9209	1.25929	0.693173
TCGA-08-0520	327	1	MALE	NA	NA	WHITE	NA	NA	Gain chr 7 & loss chr 10	non-codel	2	1.83805	2.73301	2.15576	0.814902	0.744589	0.731345	0.881178	1.37106	1.11758	0.800581	0.798212	4.35393	1.1333	3.94433	0.959728	0.831162	6.06493	1.87052	1.31619	0.947292	1.4972	2.06132	2.53526	0.043938	0.024794	4.96167	2.74173	5.52654	1.87832	1.03392
TCGA-08-0521	146	1	MALE	NA	NA	BLACK OR AFRICAN AMERICAN	NA	NA	No combined CNA	non-codel	2	1.25242	0.857828	2.68819	1.02374	0.935407	0.920324	1.10504	1.72249	1.37707	1.00575	0.999999	0.016661	1.42333	0.024855	1.20568	1.04417	7.6192	2.35035	1.6535	1.19006	1.88089	2.39939	3.18498	0.074643	0.028927	1.3231	3.03726	0.890293	2.35955	1.29888
TCGA-08-0522	635	1	MALE	NA	NA	WHITE	NA	NA	NA	NA	1	1.23015	1.82912	1.44278	0.545387	0.498329	0.491014	0.589239	0.917711	0.752826	0.535803	0.534217	2.91488	0.758483	10.261	0.642315	0.556269	4.05906	1.25213	0.880886	0.633991	1.00203	1.5633	1.69677	17.5478	0.905172	3.30789	5.26326	7.11461	1.2571	0.691968
TCGA-08-0524	221	1	FEMALE	NA	NA	WHITE	NA	NA	No combined CNA	non-codel	1	1.25038	1.85919	1.4665	0.554356	0.506524	0.498613	0.599515	0.932802	0.765206	0.544614	0.543002	2.96282	0.770956	10.4297	0.652877	0.565417	4.12581	1.27272	0.895371	0.644417	1.0185	1.56037	1.72467	17.8364	0.015691	3.43586	5.54722	6.25592	1.27777	0.703346
TCGA-08-0525	486	1	MALE	NA	NA	NA	NA	NA	Gain chr 7 & loss chr 10	non-codel	1	1.29249	1.9218	1.51589	0.573024	0.523581	0.51529	0.619287	0.964215	0.790975	0.562954	0.561288	3.06259	0.796919	10.7809	0.674863	0.584458	4.26475	1.31558	0.925524	0.666118	1.0528	1.62492	1.78275	18.437	0.02975	1.20927	5.16994	5.98655	1.3208	0.727032
TCGA-08-0529	560	1	FEMALE	NA	NA	NA	NA	NA	Gain chr 7 & loss chr 10	non-codel	2	0.065058	0.28532	2.9103	1.1137	1.01761	0.995165	1.1761	1.86885	1.48079	1.09413	1.09067	0.004203	1.4816	0.013826	1.31163	1.13592	8.28875	2.54564	1.7988	1.29463	2.04353	1.25623	3.46156	0.011918	0.018392	0.3335	0.185274	0.832996	2.50966	1.41288
TCGA-08-0531	230	1	MALE	NA	NA	WHITE	NA	NA	No combined CNA	non-codel	1	1.76629	2.6263	2.07158	0.783084	0.715516	0.696943	0.825457	1.31752	1.0771	0.769322	0.766115	4.18528	1.08905	13.3842	0.922256	0.798709	5.82812	1.79722	1.2648	0.910304	1.43869	1.78429	2.43627	0.052807	0.216373	0.65038	2.29012	4.33113	1.80488	0.993549
TCGA-12-0615	467	1	FEMALE	NA	WT	WHITE	NA	WT	No combined CNA	non-codel	1	1.29765	1.92949	1.52195	0.575316	0.525675	0.517959	0.621156	0.968033	0.794138	0.565205	0.563533	3.07484	0.800106	10.824	0.677562	0.586795	4.2818	1.32084	0.929225	0.668782	1.05701	1.65	1.78988	18.5108	0.954843	3.41035	5.84058	1.83268	1.32608	0.72994
TCGA-12-0616	448	1	FEMALE	NA	WT	WHITE	NA	WT	No combined CNA	non-codel	1	1.29238	1.92165	1.51576	0.572977	0.523538	0.515626	0.618025	0.964135	0.79091	0.562908	0.561204	3.06234	0.796853	10.78	0.674808	0.584409	4.26439	1.31547	0.925447	0.666063	1.05272	1.62361	1.7826	18.4355	0.939492	3.4962	5.76498	2.19265	1.32069	0.726972
TCGA-12-0618	395	1	MALE	NA	WT	WHITE	NA	WT	Gain chr 7 & loss chr 10	non-codel	1	1.22564	1.82241	1.43749	0.543389	0.496503	0.489216	0.587655	0.914349	0.750068	0.53384	0.53226	2.9042	0.755705	10.2234	0.639962	0.554231	4.04419	1.24754	0.877658	0.631669	0.998356	1.55844	1.69055	17.4835	0.901855	3.36876	5.51718	7.10506	1.25249	0.689432
TCGA-12-0619	1062	1	MALE	NA	WT	WHITE	NA	WT	Gain chr 7 & loss chr 10	non-codel	1	1.22585	1.82273	1.43774	0.543482	0.496588	0.488868	0.587755	0.914505	0.750197	0.533931	0.532351	2.9047	0.755834	10.2251	0.640071	0.554326	4.04488	1.24775	0.877809	0.631777	0.998527	1.55871	1.69084	17.4865	0.901866	3.36933	5.5034	7.10628	1.25271	0.68955
TCGA-12-0620	318	1	MALE	NA	WT	WHITE	NA	NA	Gain chr 7 & loss chr 10	non-codel	1	1.49385	2.22121	1.75206	0.6623	0.605154	0.594477	0.715726	1.11426	0.912981	0.65066	0.648735	3.53973	0.921076	12.2492	0.780005	0.675514	4.92918	1.52054	1.06972	0.769897	1.21683	1.89155	2.0605	0.942998	1.07094	4.01887	6.7162	7.55939	1.52658	0.840301
TCGA-12-0654	231	1	FEMALE	NA	NA	WHITE	NA	NA	Gain chr 7 & loss chr 10	non-codel	1	1.27119	1.89014	1.49091	0.563583	0.514954	0.507396	0.609195	0.948328	0.777942	0.553678	0.55204	3.01213	0.783788	10.6033	0.663744	0.574828	4.19448	1.2939	0.910274	0.655143	1.03546	1.61378	1.75338	18.1332	0.93537	3.4324	5.69578	3.75399	1.29904	0.715053
TCGA-12-0656	2883	1	FEMALE	NA	WT	BLACK OR AFRICAN AMERICAN	NA	NA	Gain chr 7 & loss chr 10	non-codel	1	1.27275	1.89246	1.49274	0.564275	0.515587	0.507944	0.610055	0.949418	0.778748	0.554358	0.552718	3.01583	0.784751	10.6163	0.664559	0.575533	4.19963	1.29549	0.911392	0.655947	1.03673	1.59176	1.75553	15.7673	0.580939	3.29513	5.71246	6.56544	1.30064	0.715931
TCGA-12-0657	3	1	MALE	NA	WT	WHITE	NA	NA	Gain chr 7 & loss chr 10	non-codel	1	1.27237	1.8919	1.4923	0.564107	0.515433	0.507868	0.609054	0.94921	0.778666	0.554193	0.552554	3.01493	0.784517	10.6132	0.664361	0.575362	4.19838	1.29511	0.911121	0.655752	1.03642	1.61786	1.75501	18.1501	0.93624	3.39765	5.72753	3.67523	1.30025	0.715718
TCGA-12-0662	1161	1	MALE	NA	WT	WHITE	NA	NA	Gain chr 7 & loss chr 10	non-codel	1	1.3097	1.9474	1.53608	0.580657	0.530555	0.522499	0.627076	0.977058	0.801511	0.570452	0.568764	3.10338	0.807533	10.9245	0.683852	0.592242	4.32155	1.3331	0.937851	0.674991	1.06683	1.64886	1.8065	18.6826	0.789541	3.53972	5.76744	1.12218	1.3384	0.736716
TCGA-12-0670	790	1	MALE	Classic-like	WT	WHITE	Methylated	NA	Gain chr 7 & loss chr 10	non-codel	1	1.22574	1.82256	1.43761	0.543433	0.496543	0.489255	0.587235	0.914422	0.750128	0.533882	0.532303	2.90443	0.755765	10.2242	0.640013	0.554275	4.04451	1.24764	0.877728	0.631719	0.998435	1.55856	1.69069	17.4849	0.901927	3.36565	5.51726	7.10527	1.25259	0.689487
TCGA-12-0688	811	1	MALE	NA	WT	WHITE	NA	WT	Gain chr 7 & loss chr 10	non-codel	1	1.22576	1.82258	1.43762	0.54344	0.49655	0.489261	0.587709	0.914434	0.750138	0.53389	0.53231	2.90448	0.755775	10.2243	0.640021	0.554283	4.04456	1.24766	0.87774	0.631728	0.998449	1.55858	1.69071	17.4852	0.90194	3.36735	5.5177	7.10321	1.25261	0.689497
TCGA-12-0691	369	1	MALE	NA	WT	WHITE	NA	NA	Gain chr 7 & loss chr 10	non-codel	1	1.2258	1.82265	1.43768	0.543461	0.496569	0.48928	0.587696	0.914469	0.750167	0.53391	0.53233	2.90459	0.755804	10.2247	0.640046	0.554304	4.04472	1.24771	0.877774	0.631752	0.998487	1.55864	1.69077	17.4858	0.901974	3.35713	5.51791	7.106	1.25266	0.689523
TCGA-12-0692	111	1	FEMALE	NA	WT	WHITE	NA	WT	Gain chr 7 & loss chr 10	non-codel	1	1.71471	2.54961	2.01109	0.760217	0.694623	0.68292	0.819936	1.2792	1.04339	0.746857	0.744597	4.06306	1.05725	10.125	0.895325	0.775386	5.65794	1.74535	1.22787	0.883723	1.39663	2.13851	2.36513	0.091968	0.019951	0.492162	2.49788	9.33396	1.75208	0.964536
TCGA-12-0703	620	1	MALE	NA	NA	WHITE	NA	NA	Gain chr 7 & loss chr 10	non-codel	1	1.27203	1.89139	1.49189	0.563954	0.515294	0.507507	0.609783	0.948804	0.778455	0.554044	0.552404	3.01412	0.784305	10.6103	0.664182	0.575207	4.19724	1.29476	0.910874	0.655575	1.03614	1.58005	1.75453	18.1452	0.03617	1.96333	5.46294	6.38398	1.2999	0.715525
TCGA-12-0707	864	1	MALE	NA	WT	WHITE	NA	NA	Gain chr 7 & loss chr 10	non-codel	1	1.52692	2.27039	1.79084	0.67696	0.618549	0.608039	0.731972	1.13911	0.924783	0.665064	0.663096	3.61809	0.941465	11.7506	0.797271	0.690467	5.03829	1.5542	1.0934	0.78694	1.24376	1.93584	2.10611	0.589031	0.020754	4.09092	6.82685	7.72807	1.56037	0.858903
TCGA-12-0769	458	1	MALE	NA	NA	WHITE	NA	NA	Gain chr 7 & loss chr 10	non-codel	1	1.22571	1.82252	1.43757	0.543419	0.496531	0.489243	0.587687	0.914399	0.75011	0.533869	0.53229	2.90436	0.755746	10.2239	0.639997	0.554262	4.04441	1.24761	0.877707	0.631703	0.998411	1.55852	1.69065	17.4845	0.901905	3.36894	5.5121	7.10545	1.25256	0.68947
TCGA-12-0772	1638	1	MALE	NA	NA	WHITE	NA	NA	Gain chr 7 & loss chr 10	non-codel	1	1.23251	1.83262	1.44554	0.546433	0.499284	0.491847	0.59091	0.91947	0.75427	0.53683	0.535242	2.92047	0.759938	10.2806	0.643546	0.557336	4.06684	1.25453	0.882574	0.635207	1.00395	1.55962	1.70002	17.5815	0.367875	3.38531	5.54664	7.14089	1.25951	0.693294
TCGA-12-0773	1315	1	MALE	NA	WT	WHITE	NA	NA	No combined CNA	non-codel	1	1.22783	1.82566	1.44005	0.544358	0.497388	0.489872	0.588666	0.915979	0.751405	0.534791	0.533209	2.90938	0.757052	10.2416	0.641102	0.555219	4.0514	1.24977	0.879223	0.632795	1.00014	1.54917	1.69357	17.5147	0.903463	3.37433	5.52486	6.95984	1.25473	0.690661
TCGA-12-0775	232	1	FEMALE	NA	WT	BLACK OR AFRICAN AMERICAN	NA	NA	Gain chr 7 & loss chr 10	non-codel	2	1.60337	2.38406	1.88051	0.710855	0.649519	0.638859	0.768762	1.19614	0.955775	0.698363	0.696296	3.79896	0.988603	6.49566	0.83719	0.725038	5.29055	1.63202	1.14814	0.826341	1.30604	2.03342	2.21156	0.223161	0.286432	4.40696	7.0428	9.10877	1.6385	0.901907
TCGA-12-0776	296	1	MALE	NA	NA	WHITE	NA	NA	Gain chr 7 & loss chr 10	non-codel	1	1.25205	1.86168	1.46846	0.555098	0.507202	0.49939	0.600281	0.934051	0.766231	0.545343	0.543473	2.96678	0.771989	10.4437	0.653751	0.566174	4.13133	1.27442	0.89657	0.64528	1.01987	1.56587	1.72698	17.8603	0.921252	3.39011	5.63387	5.19268	1.27948	0.704288
TCGA-12-0778	454	1	MALE	NA	WT	WHITE	NA	NA	Gain chr 7 & loss chr 10	non-codel	1	1.22565	1.82242	1.4375	0.543391	0.496505	0.489217	0.587657	0.914352	0.750071	0.533842	0.532262	2.90421	0.755707	10.2234	0.639964	0.554233	4.0442	1.24754	0.877662	0.631671	0.998359	1.55845	1.69056	17.4836	0.901859	3.36877	5.5172	7.10509	1.2525	0.689435
TCGA-12-0780	452	1	FEMALE	NA	NA	WHITE	NA	NA	Gain chr 7 & loss chr 10	non-codel	1	1.23901	1.8423	1.45317	0.549318	0.50192	0.494553	0.593994	0.924325	0.758252	0.539664	0.538067	2.93589	0.76395	10.3349	0.646944	0.560278	4.08831	1.26115	0.887234	0.63856	1.00925	1.57406	1.709	17.6743	0.911695	3.40442	5.56939	6.10507	1.26616	0.696955
TCGA-12-0818	2791	1	FEMALE	G-CIMP-high	Mutant	WHITE	Methylated	NA	No combined CNA	non-codel	1	1.22588	1.82276	1.43776	0.543493	0.496598	0.489309	0.587766	0.914523	0.750211	0.533941	0.532361	2.90476	0.755848	10.2253	0.640083	0.554337	4.04496	1.24778	0.877825	0.631789	0.998546	1.55873	1.69087	17.4868	0.902027	3.36035	5.51823	7.1039	1.25273	0.689564
TCGA-12-0819	754	1	FEMALE	Mesenchymal-like	WT	BLACK OR AFRICAN AMERICAN	Methylated	NA	Gain chr 7 & loss chr 10	non-codel	1	1.22637	1.8235	1.43834	0.543711	0.496798	0.489506	0.587823	0.914891	0.750513	0.534156	0.532576	2.90592	0.756153	10.2294	0.640341	0.55456	4.04658	1.24828	0.878179	0.632043	0.998948	1.55933	1.69155	17.4939	0.90239	3.36619	5.52045	7.0579	1.25324	0.689841
TCGA-12-0820	562	1	MALE	Mesenchymal-like	WT	WHITE	Unmethylated	NA	Gain chr 7 & loss chr 10	non-codel	1	1.32516	1.97039	1.55421	0.587511	0.536701	0.526765	0.62982	0.988436	0.810971	0.577186	0.574973	3.14002	0.817065	11.0535	0.691924	0.599233	4.37256	1.34701	0.948921	0.682958	1.07942	1.65563	1.82782	18.9031	0.008956	3.41685	4.02361	2.792	1.35408	0.745412
TCGA-12-0821	323	1	MALE	LGm6-GBM	WT	WHITE	Unmethylated	WT	Gain chr 7 & loss chr 10	non-codel	1	1.2257	1.82251	1.43756	0.543417	0.496492	0.48924	0.587684	0.914395	0.750106	0.533867	0.532287	2.90435	0.755743	10.2239	0.639994	0.554259	4.04439	1.2476	0.877703	0.6317	0.998406	1.55845	1.69064	17.4844	0.901901	3.36821	5.51638	7.10398	1.25256	0.689467
TCGA-12-0822	715	1	MALE	LGm6-GBM	WT	WHITE	Methylated	NA	Gain chr 7 & loss chr 10	non-codel	1	1.22574	1.82256	1.43761	0.543434	0.496544	0.489256	0.587703	0.914424	0.75013	0.533884	0.532304	2.90444	0.755767	10.2242	0.640014	0.554277	4.04452	1.24764	0.87773	0.63172	0.998438	1.55857	1.69069	17.485	0.901929	3.3672	5.51763	7.09954	1.2526	0.689489
TCGA-12-0826	845	1	FEMALE	LGm6-GBM	WT	WHITE	Unmethylated	NA	Gain chr 7 & loss chr 10	non-codel	1	1.22572	1.82253	1.43758	0.543423	0.496534	0.489246	0.587691	0.914406	0.750115	0.533873	0.532293	2.90438	0.755752	10.224	0.640001	0.554266	4.04444	1.24762	0.877713	0.631708	0.998418	1.55854	1.69066	17.4846	0.901911	3.36519	5.51753	7.10514	1.25257	0.689475
TCGA-12-0827	1179	1	FEMALE	G-CIMP-low	Mutant	WHITE	Methylated	NA	No combined CNA	non-codel	1	1.22572	1.82252	1.43758	0.543422	0.496533	0.489245	0.587654	0.914404	0.750114	0.533872	0.532292	2.90438	0.75575	10.224	0.64	0.554265	4.04443	1.24762	0.877712	0.631707	0.998416	1.55853	1.69066	17.4846	0.90191	3.36885	5.51752	7.10549	1.25257	0.689474
TCGA-12-0828	272	1	MALE	Mesenchymal-like	WT	WHITE	Unmethylated	NA	Gain chr 7 & loss chr 10	non-codel	1	1.22579	1.82263	1.43766	0.543453	0.496562	0.489273	0.587688	0.914457	0.750157	0.533903	0.532323	2.90455	0.755794	10.2246	0.640037	0.554297	4.04466	1.24769	0.877762	0.631743	0.998474	1.55862	1.69075	17.4856	0.901962	3.36793	5.51712	7.10446	1.25264	0.689514
TCGA-12-0829	626	1	MALE	Mesenchymal-like	WT	BLACK OR AFRICAN AMERICAN	Methylated	NA	Gain chr 7 & loss chr 10	non-codel	1	1.31418	1.95406	1.54133	0.582642	0.532369	0.523862	0.630066	0.980398	0.80425	0.572402	0.570708	3.11399	0.810294	10.9619	0.68619	0.594267	4.33632	1.33766	0.941057	0.677298	1.07047	1.52212	1.81267	18.7465	0.071575	3.53877	2.85551	4.58384	1.34297	0.739234
TCGA-12-1088	3881	1	FEMALE	LGm6-GBM	WT	WHITE	Unmethylated	NA	Gain chr 7 & loss chr 10	non-codel	1	1.29689	1.92835	1.52105	0.574975	0.525364	0.516095	0.620712	0.967498	0.793668	0.564871	0.563199	3.07302	0.799632	10.8176	0.677161	0.586447	4.27926	1.32006	0.928675	0.668386	1.05639	1.56242	1.78882	18.4998	0.733382	3.48115	5.68669	2.26263	1.3253	0.729507
TCGA-12-1089	177	1	MALE	Mesenchymal-like	WT	WHITE	Unmethylated	NA	No combined CNA	non-codel	1	1.22657	1.8238	1.43858	0.543802	0.49688	0.489587	0.588065	0.915043	0.750638	0.534245	0.532664	2.90641	0.756279	10.2311	0.640448	0.554652	4.04726	1.24849	0.878325	0.632148	0.999114	1.55962	1.69184	17.4968	0.90254	3.37128	5.47826	7.08099	1.25345	0.689956
TCGA-12-1090	231	1	MALE	NA	NA	WHITE	Methylated	NA	No combined CNA	non-codel	1	1.24873	1.85674	1.46457	0.553625	0.505856	0.498394	0.598541	0.931536	0.764197	0.543896	0.542286	2.95891	0.76994	10.416	0.652016	0.564671	4.12037	1.27104	0.894191	0.643567	1.01716	1.5878	1.7224	17.8129	0.918844	3.31725	5.62111	5.48065	1.27609	0.702419
TCGA-12-1091	1010	1	FEMALE	NA	NA	WHITE	Methylated	NA	No combined CNA	non-codel	1	1.23951	1.84303	1.45375	0.549537	0.50212	0.49475	0.594085	0.924693	0.758554	0.539879	0.538282	2.93706	0.764254	10.339	0.647202	0.560501	4.08994	1.26165	0.887588	0.638815	1.00965	1.57607	1.70968	17.6813	0.912058	3.39176	5.5796	6.07991	1.26666	0.697232
TCGA-12-1092	661	1	MALE	Mesenchymal-like	WT	WHITE	Methylated	NA	No combined CNA	non-codel	1	1.22937	1.82796	1.44186	0.545043	0.498014	0.489948	0.589263	0.917131	0.752351	0.535464	0.53388	2.91304	0.758004	10.2545	0.641909	0.555918	4.05649	1.25134	0.880329	0.633591	1.00139	1.55537	1.6957	17.5367	0.904564	3.11477	5.51813	7.11984	1.25631	0.69153
TCGA-12-1093	486	1	FEMALE	Mesenchymal-like	WT	WHITE	Unmethylated	NA	Gain chr 7 & loss chr 10	non-codel	1	1.24571	1.85226	1.46103	0.552288	0.504634	0.496643	0.597168	0.929322	0.762351	0.542582	0.540976	2.95176	0.76808	10.3908	0.650441	0.563307	4.11041	1.26797	0.892031	0.642012	1.0147	1.57068	1.71824	17.7698	0.357115	3.41713	5.55535	6.22126	1.273	0.700722
TCGA-12-1094	372	1	MALE	NA	NA	WHITE	Unmethylated	NA	Gain chr 7 & loss chr 10	non-codel	1	1.24076	1.8449	1.45522	0.550093	0.502628	0.494996	0.59465	0.925629	0.759321	0.540425	0.538826	2.94003	0.765027	10.3495	0.647856	0.561069	4.09408	1.26293	0.888486	0.639461	1.01067	1.57221	1.71141	17.6992	0.51633	2.96122	5.57761	6.82492	1.26795	0.697938
TCGA-12-1095	482	1	FEMALE	NA	NA	WHITE	Unmethylated	NA	Gain chr 7 & loss chr 10	non-codel	1	1.23398	1.83481	1.44726	0.547084	0.499879	0.491674	0.59165	0.920565	0.755168	0.537469	0.535879	2.92395	0.760843	10.2929	0.644313	0.557999	4.07168	1.25602	0.883626	0.635963	1.00514	1.55613	1.70205	17.6024	0.8863	3.35942	5.51349	6.58554	1.26101	0.69412
TCGA-12-1096	277	1	MALE	NA	NA	WHITE	Unmethylated	NA	Gain chr 7 & loss chr 10	non-codel	1	1.22782	1.82565	1.44004	0.544354	0.497385	0.490084	0.588698	0.915972	0.7514	0.534788	0.533205	2.90936	0.757046	10.2415	0.641098	0.555215	4.05137	1.24976	0.879217	0.63279	1.00013	1.56113	1.69355	17.5146	0.903421	3.37474	5.35255	7.11768	1.25472	0.690657
TCGA-12-1097	442	1	MALE	NA	NA	WHITE	Unmethylated	NA	Gain chr 7 & loss chr 10	non-codel	1	1.29141	1.92021	1.51463	0.57255	0.523148	0.513388	0.618699	0.963416	0.79032	0.562488	0.560823	3.06005	0.796259	10.772	0.674304	0.583973	4.26121	1.31449	0.924757	0.665566	1.05193	1.45411	1.78127	18.4218	0.831513	3.40734	4.75221	3.66203	1.31971	0.72643
TCGA-12-1098	121	1	FEMALE	NA	NA	WHITE	Unmethylated	NA	No combined CNA	non-codel	2	1.72949	2.56956	2.02843	0.766771	0.700611	0.689668	0.829183	1.29023	1.02397	0.753296	0.751067	3.77874	1.06637	0.467347	0.903043	0.78207	5.70671	1.76039	1.23846	0.891341	1.40877	2.11277	2.38552	0.492717	0.148111	4.73634	7.60844	8.83185	1.76738	0.972851
TCGA-12-1099	126	1	FEMALE	NA	NA	WHITE	Unmethylated	NA	No combined CNA	non-codel	1	1.2263	1.82339	1.43826	0.54368	0.496769	0.489442	0.587933	0.914839	0.75047	0.534126	0.532545	2.90576	0.756109	10.2288	0.640304	0.554528	4.04635	1.24821	0.878129	0.632007	0.998891	1.55927	1.69146	17.4929	0.902339	3.33306	5.52014	7.10851	1.25317	0.689802
TCGA-12-1598	476	1	FEMALE	Classic-like	WT	WHITE	Methylated	NA	Gain chr 7 & loss chr 10	non-codel	1	1.22589	1.82279	1.43778	0.5435	0.496604	0.489243	0.587774	0.914534	0.750221	0.533948	0.532368	2.90479	0.755858	10.2255	0.640092	0.554344	4.04501	1.24779	0.877837	0.631797	0.998559	1.55746	1.6909	17.4871	0.884121	3.36872	5.5183	7.1065	1.25275	0.689572
TCGA-12-1599	781	1	FEMALE	Mesenchymal-like	WT	WHITE	Methylated	NA	Gain chr 7 & loss chr 10	non-codel	1	1.22615	1.82316	1.43808	0.543613	0.496708	0.489417	0.587645	0.914725	0.750377	0.53406	0.532479	2.9054	0.756016	10.2276	0.640225	0.554459	4.04585	1.24805	0.87802	0.631929	0.998767	1.55908	1.69125	17.4907	0.902227	3.33674	5.51945	7.10762	1.25301	0.689716
TCGA-12-1600	448	1	MALE	Classic-like	WT	WHITE	Unmethylated	NA	Gain chr 7 & loss chr 10	non-codel	1	1.24309	1.84836	1.45795	0.551124	0.503571	0.495997	0.59602	0.927364	0.760745	0.541439	0.539837	2.94554	0.766462	10.3689	0.649071	0.562121	4.10175	1.2653	0.890152	0.64066	1.01257	1.57309	1.71462	17.7324	0.678164	3.41591	5.58516	6.04649	1.27032	0.699246
TCGA-12-1602	206	1	MALE	Mesenchymal-like	WT	WHITE	Methylated	NA	Gain chr 7 & loss chr 10	non-codel	1	1.26877	1.88654	1.48807	0.562508	0.513973	0.505797	0.608331	0.94652	0.776385	0.552623	0.550988	3.00639	0.782294	10.5827	0.662479	0.573732	4.18648	1.29144	0.908539	0.653894	1.03348	1.61286	1.75003	15.071	0.860449	3.48728	5.30696	7.35319	1.29656	0.71369
TCGA-12-3644	1818	1	FEMALE	Mesenchymal-like	WT	WHITE	Methylated	NA	Gain chr 7 & loss chr 10	non-codel	1	1.22819	1.8262	1.44048	0.544518	0.497535	0.490232	0.588875	0.916248	0.751626	0.534949	0.533366	2.91024	0.757274	10.2446	0.641291	0.555382	4.05259	1.25013	0.879481	0.632981	1.00043	1.56168	1.69406	17.5198	0.903729	3.20966	5.52864	7.09032	1.2551	0.690864
TCGA-12-3646	1339	1	FEMALE	Classic-like	WT	WHITE	Methylated	NA	Gain chr 7 & loss chr 10	non-codel	1	1.2263	1.82339	1.43826	0.54368	0.496769	0.489478	0.587933	0.914838	0.75047	0.534126	0.532545	2.90576	0.756109	10.2288	0.640304	0.554528	4.04635	1.24821	0.878129	0.632007	0.998891	1.55909	1.69146	17.4929	0.902338	3.32922	5.51978	7.1006	1.25317	0.689802
TCGA-12-3648	819	1	FEMALE	Classic-like	WT	WHITE	Methylated	NA	Gain chr 7 & loss chr 10	non-codel	1	1.23002	1.82893	1.44263	0.545331	0.498278	0.49082	0.589755	0.917617	0.752749	0.535748	0.534162	2.91458	0.758405	10.2599	0.642249	0.556212	4.05864	1.252	0.880795	0.633926	1.00192	1.55943	1.6966	17.546	0.568426	3.38054	5.53438	7.11856	1.25697	0.691896
TCGA-12-3649	463	1	MALE	Classic-like	WT	WHITE	Unmethylated	WT	Gain chr 7 & loss chr 10	non-codel	1	1.22568	1.82247	1.43754	0.543406	0.496519	0.489231	0.587673	0.914377	0.750092	0.533857	0.532277	2.90429	0.755728	10.2237	0.639982	0.554249	4.04431	1.24758	0.877686	0.631688	0.998387	1.55849	1.69061	17.4841	0.901884	3.3685	5.51736	7.10457	1.25253	0.689454
TCGA-12-3650	333	1	MALE	Classic-like	WT	WHITE	Unmethylated	WT	Gain chr 7 & loss chr 10	non-codel	1	1.22578	1.82262	1.43765	0.54345	0.496559	0.48927	0.58772	0.914451	0.750152	0.5339	0.532284	2.90453	0.755789	10.2245	0.640033	0.554293	4.04464	1.24768	0.877757	0.631739	0.998468	1.55861	1.69074	17.4855	0.901956	3.36913	5.5178	7.10586	1.25263	0.68951
TCGA-12-3651	386	1	MALE	Mesenchymal-like	WT	WHITE	Methylated	NA	Gain chr 7 & loss chr 10	non-codel	1	1.22596	1.82288	1.43786	0.543529	0.496631	0.489341	0.587733	0.914583	0.75026	0.533977	0.532397	2.90495	0.755898	10.226	0.640126	0.554373	4.04522	1.24786	0.877883	0.63183	0.998612	1.55866	1.69099	17.488	0.901189	3.35314	5.5186	7.10508	1.25282	0.689609
TCGA-12-3652	1062	1	MALE	Classic-like	WT	WHITE	Unmethylated	WT	No combined CNA	non-codel	1	1.22567	1.82246	1.43753	0.543403	0.496516	0.489228	0.587634	0.914373	0.750088	0.533854	0.532274	2.90428	0.755724	10.2236	0.639978	0.554246	4.04429	1.24757	0.877681	0.631685	0.998382	1.55848	1.6906	17.484	0.901879	3.36734	5.51733	7.10525	1.25253	0.68945
TCGA-12-3653	442	1	FEMALE	Mesenchymal-like	WT	WHITE	Unmethylated	WT	Gain chr 7 & loss chr 10	non-codel	1	1.22573	1.82254	1.43759	0.543428	0.496538	0.48925	0.587696	0.914413	0.750121	0.533877	0.532298	2.90441	0.755758	10.2241	0.640007	0.55427	4.04447	1.24763	0.87772	0.631713	0.998426	1.55855	1.69067	17.4848	0.901919	3.36508	5.51757	7.10556	1.25258	0.689481
TCGA-14-0783	189	1	FEMALE	NA	NA	WHITE	Methylated	NA	Gain chr 7 & loss chr 10	non-codel	1	1.23185	1.83164	1.44477	0.54614	0.499017	0.491512	0.590593	0.918977	0.753865	0.536542	0.534846	2.91891	0.75953	10.2751	0.643201	0.557037	4.06466	1.25386	0.882101	0.634866	1.00341	1.56073	1.69911	17.572	0.67185	3.3818	5.53248	6.90433	1.25884	0.692922
TCGA-14-0786	701	1	FEMALE	Classic-like	WT	WHITE	Methylated	WT	Gain chr 7 & loss chr 10	non-codel	1	1.2257	1.82251	1.43756	0.543417	0.496528	0.48924	0.587684	0.914395	0.750106	0.533867	0.532072	2.90435	0.755743	10.2239	0.639994	0.554259	4.04439	1.2476	0.877703	0.6317	0.998406	1.55852	1.69064	17.4844	0.901901	3.36889	5.51746	7.10542	1.25256	0.689467
TCGA-14-0787	68	1	MALE	Classic-like	WT	ASIAN	Methylated	WT	Gain chr 7 & loss chr 10	non-codel	2	1.83228	2.72443	2.14587	0.812344	0.742252	0.728995	0.873206	1.36675	1.09594	0.798068	0.795707	4.34032	1.12975	4.43263	0.956716	0.828552	6.04589	1.86502	1.31206	0.944318	1.4925	1.39444	2.52731	0.268048	0.019776	4.6216	8.0483	0.790608	1.87243	1.03067
TCGA-14-0789	342	1	MALE	Classic-like	WT	WHITE	Methylated	WT	Gain chr 7 & loss chr 10	non-codel	1	1.22797	1.82588	1.44022	0.544423	0.497447	0.489534	0.588233	0.916087	0.751495	0.534855	0.533272	2.90973	0.757142	10.2428	0.641178	0.555285	4.05188	1.24991	0.879327	0.63287	1.00025	1.55719	1.69377	17.5168	0.780773	3.32401	5.52156	7.11749	1.25488	0.690743
TCGA-14-0813	41	1	MALE	Mesenchymal-like	WT	WHITE	Methylated	WT	Gain chr 7 & loss chr 10	non-codel	1	1.50561	2.2387	1.76408	0.667512	0.609916	0.600434	0.719771	1.12321	0.921225	0.655781	0.653841	3.56759	0.928325	12.5547	0.786143	0.68083	4.96797	1.53251	1.07814	0.775956	1.2264	1.52872	2.07671	9.34631	0.038441	4.03021	5.57568	0.807488	1.53859	0.846914
TCGA-14-0817	164	1	FEMALE	Classic-like	WT	WHITE	Unmethylated	WT	Gain chr 7 & loss chr 10	non-codel	1	1.30668	1.94291	1.53253	0.579316	0.52933	0.520527	0.623561	0.974802	0.79966	0.569135	0.567451	3.09622	0.805669	10.8993	0.682273	0.590875	4.31157	1.33002	0.935686	0.673432	1.06436	1.56483	1.80232	18.6395	0.05157	3.23963	4.93965	3.28992	1.3353	0.735015
TCGA-14-0867	62	1	MALE	Mesenchymal-like	WT	WHITE	Methylated	NA	Gain chr 7 & loss chr 10	non-codel	1	1.22715	1.82466	1.43927	0.54406	0.497116	0.489101	0.588237	0.915478	0.750995	0.534499	0.532917	2.90779	0.756638	10.236	0.640752	0.554916	4.04918	1.24908	0.878742	0.632449	0.999589	1.54642	1.69264	17.5051	0.888843	3.36727	5.44779	7.10521	1.25404	0.690284
TCGA-14-0871	880	1	FEMALE	LGm6-GBM	WT	WHITE	Unmethylated	WT	Gain chr 7 & loss chr 10	non-codel	1	1.22564	1.82242	1.43749	0.54339	0.496504	0.489216	0.587655	0.914349	0.750069	0.53384	0.53226	2.90421	0.755705	10.2234	0.639962	0.554232	4.04419	1.24754	0.877659	0.631669	0.998356	1.55844	1.69055	17.4835	0.901856	3.36876	5.51718	7.10506	1.2525	0.689433
TCGA-14-1034	485	1	FEMALE	Classic-like	WT	NA	Methylated	WT	Gain chr 7 & loss chr 10	non-codel	1	1.28011	1.9034	1.50137	0.567537	0.518568	0.510769	0.613207	0.954982	0.782989	0.557564	0.555876	3.03327	0.789288	10.6777	0.668401	0.578861	4.22391	1.30298	0.916661	0.65974	1.04272	1.60606	1.76568	18.1364	0.842945	3.47328	5.75412	3.32303	1.30816	0.720071
TCGA-14-1037	587	1	FEMALE	Mesenchymal-like	WT	WHITE	Unmethylated	NA	Gain chr 7 & loss chr 10	non-codel	1	1.24107	1.84535	1.45558	0.550228	0.502752	0.495373	0.594796	0.925857	0.759509	0.540559	0.538668	2.94075	0.765216	10.352	0.648016	0.561207	4.09509	1.26324	0.888705	0.639619	1.01092	1.57805	1.71183	17.7036	0.913206	3.37131	5.58662	6.03375	1.26826	0.698109
TCGA-14-1396	34	1	FEMALE	Classic-like	WT	WHITE	Methylated	NA	No combined CNA	non-codel	1	1.26105	1.87507	1.47902	0.559089	0.510849	0.503313	0.604264	0.940767	0.77174	0.549264	0.547565	2.98811	0.777539	10.5188	0.658452	0.570244	4.16103	1.28359	0.903016	0.649919	1.0272	1.57927	1.7394	17.9887	0.926213	2.82352	5.63079	5.16463	1.28868	0.709352
TCGA-14-1401	114	1	MALE	NA	NA	WHITE	Methylated	NA	Gain chr 7 & loss chr 10	non-codel	1	1.22676	1.82407	1.4388	0.543883	0.496954	0.48966	0.588188	0.915072	0.75075	0.534325	0.532528	2.90684	0.756391	10.2327	0.640543	0.554735	4.04786	1.24867	0.878456	0.632242	0.999263	1.55985	1.69209	17.4994	0.902675	3.30559	5.52219	7.11151	1.25363	0.690059
TCGA-14-1402	975	1	FEMALE	NA	NA	WHITE	Methylated	NA	No combined CNA	non-codel	1	1.23312	1.83353	1.44626	0.546703	0.499531	0.491585	0.589216	0.919925	0.754606	0.537095	0.534098	2.92191	0.760313	10.2857	0.643864	0.557611	4.06885	1.25515	0.883011	0.635521	1.00444	1.56643	1.70086	17.5219	0.477173	3.3889	5.50315	7.13503	1.26013	0.693637
TCGA-14-1451	703	1	MALE	Mesenchymal-like	WT	WHITE	Unmethylated	NA	Gain chr 7 & loss chr 10	non-codel	1	1.22583	1.8227	1.43771	0.543474	0.496581	0.489256	0.587746	0.914491	0.750185	0.533923	0.532343	2.90465	0.755822	10.225	0.640061	0.554317	4.04482	1.24774	0.877795	0.631767	0.998511	1.55868	1.69081	17.4862	0.901996	3.36393	5.51732	7.09826	1.25269	0.68954
TCGA-14-1452	216	1	MALE	NA	NA	WHITE	Methylated	NA	Gain chr 7 & loss chr 10	non-codel	1	1.2398	1.84346	1.45409	0.549665	0.502237	0.494865	0.594405	0.924908	0.758731	0.540005	0.538407	2.93774	0.764432	10.3414	0.647352	0.560632	4.09089	1.26195	0.887794	0.638963	1.00988	1.57644	1.71008	17.6854	0.912271	3.3883	5.5809	6.06207	1.26696	0.697394
TCGA-14-1453	35	1	MALE	Classic-like	WT	WHITE	Unmethylated	NA	No combined CNA	non-codel	2	1.70907	2.50765	2.00477	0.757827	0.692438	0.681123	0.819561	1.27518	1.00842	0.744509	0.740954	2.27348	1.05393	0.142503	0.89251	0.772947	5.64014	1.73986	1.22401	0.880944	1.39234	2.15878	2.3577	2.88576	0.025019	4.65476	7.62734	9.28258	1.74677	0.961503
TCGA-14-1454	918	1	FEMALE	NA	NA	WHITE	Unmethylated	NA	Gain chr 7 & loss chr 10	non-codel	1	1.22589	1.82278	1.43778	0.543498	0.496603	0.489314	0.587772	0.914532	0.750219	0.533947	0.532259	2.90479	0.755856	10.2254	0.64009	0.554342	4.045	1.24779	0.877834	0.631795	0.998556	1.55875	1.69089	17.487	0.902036	3.35654	5.51829	7.10612	1.25275	0.689571
TCGA-14-1455	28	1	MALE	LGm6-GBM	WT	WHITE	Methylated	NA	Gain chr 7 & loss chr 10	non-codel	1	1.97385	2.93493	2.31502	0.875109	0.799485	0.785493	0.936163	1.27566	1.20125	0.859729	0.85522	4.677	1.21704	9.40788	1.03063	0.892569	6.51186	2.00814	1.41344	1.01728	1.60735	1.94066	2.72257	0.041132	0.009937	0.226264	1.02185	2.07838	2.01103	1.11031
TCGA-14-1458	203	1	MALE	G-CIMP-high	Mutant	WHITE	Methylated	NA	No combined CNA	non-codel	1	1.22606	1.82304	1.43798	0.543576	0.496674	0.489383	0.58782	0.914662	0.750325	0.534023	0.532299	2.9052	0.755964	10.2269	0.640181	0.554421	4.04557	1.24797	0.877959	0.631885	0.998698	1.55897	1.69113	17.4895	0.902165	3.3674	5.51907	7.09564	1.25293	0.689669
TCGA-14-1459	378	1	FEMALE	NA	NA	WHITE	Methylated	NA	Gain chr 7 & loss chr 10	non-codel	1	1.22666	1.82394	1.43869	0.543843	0.496917	0.489588	0.588145	0.915111	0.750694	0.534285	0.532596	2.90663	0.756335	10.2319	0.640495	0.554694	4.04756	1.24858	0.87839	0.632195	0.999188	1.55974	1.69196	17.4981	0.902608	3.37146	5.52142	7.03266	1.25354	0.690007
TCGA-14-1794	30	1	MALE	Mesenchymal-like	WT	NA	Unmethylated	NA	Gain chr 7 & loss chr 10	non-codel	1	1.50392	2.23619	1.76387	0.666765	0.609189	0.598265	0.72042	1.12195	0.919929	0.655047	0.651435	3.5636	0.927286	12.4926	0.785264	0.680068	4.96241	1.53079	1.07693	0.775088	1.22503	1.90594	2.07439	1.59731	0.405772	2.18003	6.76324	8.68389	1.53687	0.845967
TCGA-14-1795	60	1	MALE	Classic-like	WT	WHITE	Methylated	NA	Gain chr 7 & loss chr 10	non-codel	1	1.23301	1.83337	1.44613	0.546656	0.499488	0.49129	0.590574	0.919846	0.754578	0.537049	0.53546	2.92166	0.760248	10.2848	0.643809	0.557563	4.0685	1.25504	0.882935	0.635466	1.00436	1.54184	1.70072	17.5886	0.670535	3.26466	5.50954	6.9867	1.26002	0.693577
TCGA-14-1821	541	1	MALE	G-CIMP-low	Mutant	WHITE	Methylated	NA	No combined CNA	non-codel	1	1.23781	1.84051	1.45176	0.548784	0.501397	0.493601	0.593489	0.923427	0.757515	0.53914	0.537545	2.93304	0.763208	10.3249	0.646316	0.559734	4.08434	1.25993	0.886372	0.63794	1.00827	1.56695	1.70734	17.6546	0.062173	3.4022	5.54005	7.08061	1.26493	0.696278
TCGA-14-1823	543	1	FEMALE	Classic-like	WT	WHITE	Methylated	WT	Gain chr 7 & loss chr 10	non-codel	1	1.27593	1.89719	1.49647	0.565685	0.516876	0.507943	0.61173	0.951866	0.780807	0.555744	0.554025	3.02337	0.786712	10.6429	0.66622	0.576972	4.21012	1.29873	0.91367	0.657587	1.03932	1.58352	1.75992	18.1916	0.63591	3.48956	5.71777	3.72461	1.30389	0.717721
TCGA-14-1825	232	1	MALE	Mesenchymal-like	WT	WHITE	Unmethylated	WT	Gain chr 7 & loss chr 10	non-codel	1	1.24639	1.85326	1.46182	0.552588	0.504908	0.497205	0.597602	0.929826	0.761305	0.542876	0.54127	2.95336	0.768497	10.3964	0.650795	0.563613	4.11264	1.26866	0.892515	0.642361	1.01526	1.57102	1.71917	17.6663	0.905914	3.42333	5.59597	5.69491	1.2737	0.701103
TCGA-14-1827	179	1	MALE	Mesenchymal-like	WT	WHITE	Methylated	NA	Gain chr 7 & loss chr 10	non-codel	1	1.40554	2.0899	1.64848	0.623146	0.569337	0.559704	0.671562	1.04847	0.860161	0.612195	0.590581	3.33047	0.866625	11.7239	0.733893	0.63558	4.63778	1.43065	1.00648	0.724383	1.14485	1.39228	1.93869	20.0493	0.082459	0.803676	2.75459	1.59191	1.43633	0.790625
TCGA-14-1829	218	0	MALE	Mesenchymal-like	WT	BLACK OR AFRICAN AMERICAN	Unmethylated	WT	Gain chr 7 & loss chr 10	non-codel	1	1.22568	1.82247	1.43754	0.543407	0.496519	0.489231	0.587673	0.914378	0.750092	0.533857	0.532241	2.9043	0.755729	10.2237	0.639982	0.554249	4.04432	1.24758	0.877687	0.631689	0.998388	1.55845	1.69061	17.4841	0.901884	3.36886	5.51736	7.10385	1.25253	0.689454
TCGA-15-0742	419	1	MALE	NA	WT	WHITE	NA	WT	Gain chr 7 & loss chr 10	non-codel	1	1.4863	2.21	1.74321	0.658954	0.602097	0.592345	0.712503	1.10881	0.907891	0.647374	0.645241	3.52185	0.916424	12.3432	0.776065	0.672102	4.90428	1.51286	1.06431	0.766008	1.21068	1.88378	2.05009	2.03664	0.087737	4.06971	6.66486	7.63962	1.51887	0.836057
TCGA-15-1444	1537	1	MALE	G-CIMP-high	Mutant	WHITE	Methylated	Mutant	No combined CNA	non-codel	1	1.22934	1.82791	1.44182	0.545028	0.498001	0.489935	0.589355	0.917106	0.75233	0.53545	0.533793	2.91296	0.757984	10.2542	0.641891	0.555903	4.05638	1.2513	0.880305	0.633573	1.00137	1.5119	1.69565	17.5244	0.895645	3.35979	5.46648	6.99001	1.25627	0.691511
TCGA-15-1446	581	0	MALE	Classic-like	WT	WHITE	Unmethylated	NA	Gain chr 7 & loss chr 10	non-codel	1	1.22932	1.82789	1.44181	0.545022	0.497995	0.490217	0.588952	0.917095	0.752321	0.535443	0.529682	2.91293	0.757975	10.2541	0.641884	0.555896	4.05633	1.25129	0.880295	0.633566	1.00135	1.5601	1.69563	17.5332	0.904564	3.24233	5.53159	6.98489	1.25626	0.691503
TCGA-15-1447	1618	0	FEMALE	NA	NA	WHITE	Methylated	NA	No combined CNA	non-codel	1	1.37944	2.0511	1.61787	0.611576	0.558806	0.549836	0.661355	1.02908	0.843381	0.600828	0.598808	3.26863	0.850533	11.5062	0.720266	0.623778	4.55166	1.40409	0.98779	0.710933	1.12363	1.74915	1.90269	7.31903	0.926818	3.78619	6.20425	7.9239	1.40966	0.775945
TCGA-15-1449	404	1	MALE	NA	NA	WHITE	Methylated	NA	No combined CNA	non-codel	1	1.2663	1.88287	1.48517	0.561415	0.512973	0.504999	0.607148	0.944679	0.774875	0.551548	0.549916	3.00054	0.780773	10.5625	0.66119	0.572616	4.17834	1.28892	0.906772	0.652622	1.03147	1.55939	1.74663	17.7909	0.855364	3.46214	5.63492	4.5129	1.29404	0.712302
TCGA-19-0955	358	0	MALE	NA	NA	ASIAN	Methylated	NA	Gain chr 7 & loss chr 10	non-codel	2	0.319482	0.330269	2.84827	1.07773	0.984741	0.967581	1.16353	1.8134	1.45625	1.05879	1.05566	0.011148	1.47291	0.025913	1.26927	1.09924	8.02105	2.47424	1.74071	1.25282	1.98009	2.01726	3.35289	0.078331	0.060902	0.812786	0.678339	1.12501	2.48357	1.36732
TCGA-19-0957	666	1	FEMALE	Classic-like	WT	WHITE	Unmethylated	NA	Gain chr 7 & loss chr 10	non-codel	1	1.61001	2.39393	0.255998	0.713798	0.652208	0.638815	0.764446	0.345104	0.985056	0.699744	0.699178	3.81497	0.992696	13.4294	0.840561	0.72804	4.45713	1.63392	1.15087	0.829761	0.885409	0.272994	0.318441	22.9188	0.079477	0.020402	0.036463	0.101458	0.007644	0.90564
TCGA-19-0960	262	0	FEMALE	NA	NA	WHITE	Methylated	NA	No combined CNA	non-codel	2	0.189246	0.254721	0.070656	1.49297	1.36415	1.3318	1.57711	0.140519	2.00086	1.10858	1.46131	0.002913	1.8892	0.028097	1.74411	1.51329	1.60986	3.192	0.264161	1.73325	0.122024	0.277782	0.007134	0.003267	0.05353	0.027392	0.015009	0.088989	0.001667	1.89403
TCGA-19-0962	20	1	FEMALE	NA	NA	WHITE	Methylated	NA	Gain chr 7 & loss chr 10	non-codel	1	1.74227	2.5906	1.95227	0.772438	0.705635	0.692622	0.831432	0.357538	1.06333	0.758863	0.756413	4.12838	1.07425	14.5307	0.909717	0.78785	5.68254	1.68404	1.22592	0.897928	1.36371	0.790503	0.11408	15.6386	0.015051	0.072957	0.023168	0.654806	0.006649	0.980041
TCGA-19-0964	103	0	MALE	NA	NA	WHITE	Methylated	NA	No combined CNA	non-codel	2	1.92359	2.10207	2.39541	0.905924	0.827757	0.814589	0.975293	1.52432	1.22655	0.890003	0.88737	0.056923	1.25989	0.04495	1.06693	0.923999	6.74236	2.07987	1.46321	1.0531	1.66443	2.38398	2.81844	0.186835	0.076767	3.45934	9.09635	1.28808	2.08813	1.1494
TCGA-19-1385	327	1	MALE	LGm6-GBM	WT	WHITE	Methylated	NA	No combined CNA	non-codel	1	1.65925	2.46714	1.94604	0.735628	0.672106	0.659616	0.786951	0.429907	1.0075	0.7227	0.717062	3.93164	1.02306	13.6589	0.866365	0.750306	5.32669	1.59626	1.18815	0.855138	1.35155	2.07051	2.28863	0.650916	0.063454	4.4821	7.30671	1.56365	1.6956	0.933338
TCGA-19-1386	276	1	MALE	Classic-like	WT	WHITE	Unmethylated	NA	Gain chr 7 & loss chr 10	non-codel	2	3.05449	3.6759	0.015495	1.42553	1.30234	1.2722	1.52207	0.224698	1.90821	0.239447	0.930992	0.159251	1.98252	0.079528	1.66711	1.44324	2.29228	3.25171	1.41366	1.62482	0.039244	0.150022	0.035935	0.005809	0.051386	0.009446	0.014849	0.036957	0.000776	1.80866
TCGA-19-1387	181	0	MALE	Classic-like	WT	WHITE	Methylated	NA	Gain chr 7 & loss chr 10	non-codel	2	0.000899	0.007992	0.040618	1.44059	1.31629	1.2884	1.54224	1.95083	1.94607	0.792858	1.41099	0.000155	0.000104	0.005734	1.69395	1.2391	10.4133	3.30738	0.173992	1.66968	0.17976	0.14424	0.00795	0.005672	0.040498	0.022667	0.011137	0.043554	0.001499	0.000206
TCGA-19-1390	772	1	FEMALE	Classic-like	WT	WHITE	Methylated	WT	No combined CNA	non-codel	2	2.39337	3.55865	0.351582	1.0611	0.969547	0.949216	1.14257	1.78276	1.42389	1.03748	1.01406	5.51744	1.4757	2.01523	1.24968	1.08228	7.54746	2.37234	1.71153	1.23349	1.94954	0.49904	0.989246	0.006096	0.060721	1.92549	0.039	0.090498	0.002756	1.34629
TCGA-19-1392	111	1	FEMALE	NA	NA	WHITE	Methylated	NA	Gain chr 7 & loss chr 10	non-codel	1	1.50145	2.23252	1.7586	0.665671	0.608234	0.59636	0.718622	1.1198	0.91886	0.653973	0.651774	3.55775	0.925765	12.524	0.783975	0.678953	4.95427	1.52828	1.07516	0.773816	1.22289	0.758775	2.07011	19.8193	0.033604	0.533733	0.208255	0.467412	1.50999	0.844579
TCGA-19-1786	218	0	FEMALE	Mesenchymal-like	WT	ASIAN	Unmethylated	NA	Gain chr 7 & loss chr 10	non-codel	1	2.26831	3.37276	0.035223	1.00566	0.918883	0.893503	1.07269	0.086739	1.38749	0.649271	0.984992	5.37484	1.39859	18.862	1.17149	1.02572	0.996686	2.23595	1.56728	1.15681	0.284801	0.149672	0.10505	0.837028	0.040137	0.017125	0.015708	0.055848	0.000455	1.27594
TCGA-19-1787	385	1	MALE	NA	NA	WHITE	Methylated	NA	Gain chr 7 & loss chr 10	non-codel	2	2.39755	3.43425	2.79992	1.06361	0.971837	0.950545	1.14843	1.78908	1.44138	1.04492	1.04183	0.568072	1.47919	0.218836	1.25264	1.08483	7.91594	2.41357	1.7179	1.2364	1.93595	0.857156	3.20123	0.059293	0.087458	0.246171	0.119038	0.549626	1.61383	1.34947
TCGA-19-1788	112	1	MALE	NA	Mutant	WHITE	Methylated	NA	NA	NA	2	3.09142	0.749378	0.00158	1.89824	1.73408	1.65118	1.9385	0.004812	2.53383	0.001329	1.84946	0.024642	2.6373	0.053421	0.010334	0.000411	0.020141	0.919086	0.001578	0.08042	8.4e-05	0.054908	0.000206	0.002747	0.010343	0.000776	0.007312	0.026278	0.000254	2.40842
TCGA-19-1789	99	1	FEMALE	Classic-like	WT	WHITE	Methylated	NA	No combined CNA	non-codel	2	0.001549	0.00583	0.133607	1.445	1.32012	1.28814	1.52824	0.776961	1.93436	1.30895	1.41101	0.000154	4.3e-05	0.004634	1.70161	1.47058	10.2408	3.26842	0.708559	1.67956	0.219413	0.304293	0.015975	0.006163	0.070021	0.031191	0.008785	0.044121	0.000658	8.4e-05
TCGA-19-1790	154	1	MALE	Classic-like	WT	WHITE	Unmethylated	WT	NA	NA	1	1.53543	2.28303	1.79916	0.680732	0.621501	0.606839	0.674706	0.002594	0.9034	0.668769	0.636612	3.63825	0.946711	12.8074	0.575987	0.694314	1.29747	0.567936	1.09949	0.791324	0.014064	1.8959	2.04256	21.8751	1.12958	0.173835	6.48395	0.498901	1.56907	0.863688
TCGA-19-1791	4	0	FEMALE	Mesenchymal-like	WT	WHITE	Unmethylated	NA	Gain chr 7 & loss chr 10	non-codel	2	2.30509	1.28028	0.190312	1.20693	1.10279	1.08205	1.28634	0.629162	1.62842	1.1543	1.18165	0.054273	1.67842	0.053881	1.42142	1.23101	8.97698	2.72252	1.94929	1.40236	2.20198	0.483607	0.756473	0.009672	0.056657	0.400663	0.065964	0.124344	0.029959	1.5313
TCGA-19-2619	294	0	FEMALE	Mesenchymal-like	WT	BLACK OR AFRICAN AMERICAN	Methylated	WT	Gain chr 7 & loss chr 10	non-codel	2	1.81908	1.79121	2.1455	0.811026	0.741047	0.729045	0.876987	1.36469	1.08864	0.796773	0.793719	0.125774	1.12791	0.035915	0.955164	0.827208	6.03608	1.862	1.30993	0.942786	1.49008	2.23632	2.5232	0.191054	0.010334	4.979	8.13973	9.25264	1.86939	1.029
TCGA-19-2620	148	1	MALE	Classic-like	WT	WHITE	Methylated	WT	No combined CNA	non-codel	2	0.004306	0.022719	1.11531	1.22311	1.11749	1.08816	1.29713	2.04969	1.62117	1.20145	1.17163	0.000645	0.017491	0.007071	1.43959	1.24751	9.10301	2.80751	1.97551	1.42182	2.23838	0.891957	2.93583	0.030313	0.022775	0.214682	0.095167	0.215628	0.688588	0.271789
TCGA-19-2621	33	1	MALE	Mesenchymal-like	WT	WHITE	Methylated	NA	No combined CNA	non-codel	1	1.53593	2.28378	1.79898	0.680954	0.622199	0.610412	0.717261	0.085025	0.939822	0.668987	0.667008	3.63944	0.94702	12.8115	0.801975	0.694541	3.63255	1.55388	1.09985	0.791583	1.24962	0.740385	2.09901	21.8111	0.081835	0.194717	0.17557	1.07303	0.197439	0.86397
TCGA-19-2623	229	0	MALE	Mesenchymal-like	WT	WHITE	Methylated	WT	Gain chr 7 & loss chr 10	non-codel	2	0.001983	0.016525	1.08731	1.39672	1.27611	1.24899	1.47636	0.302986	1.86559	1.37181	1.35769	0.000195	0.000698	0.008464	1.63978	1.42459	6.98324	3.19661	2.15876	1.62363	0.35289	1.31386	0.139746	0.004981	0.040471	0.021091	0.035714	0.639128	0.00715	0.004098
TCGA-19-2624	5	1	MALE	Mesenchymal-like	WT	WHITE	Unmethylated	WT	Gain chr 7 & loss chr 10	non-codel	2	0.000913	0.009099	3.5493	1.41229	1.29043	1.2658	1.49991	0.813	1.89945	1.38747	1.38113	0.000228	9.7e-05	0.005996	1.66217	1.44047	10.5091	1.84458	1.93667	1.64173	0.306009	0.950423	0.085636	0.045387	0.06472	0.022832	0.018779	0.466786	0.001745	0.000353
TCGA-19-2625	124	1	FEMALE	Mesenchymal-like	WT	WHITE	Unmethylated	WT	No combined CNA	non-codel	2	0.165575	0.030017	3.1507	1.19306	1.08917	1.06143	1.27779	0.211694	1.6027	1.17209	1.16657	0.003809	1.09713	0.015249	1.40485	1.21686	5.28892	1.68018	1.92698	1.38688	2.0791	2.07642	3.71176	0.010241	0.022916	0.194471	3.30164	1.89017	2.74618	1.51063
TCGA-19-2629	737	1	MALE	G-CIMP-low	Mutant	WHITE	Unmethylated	Mutant	No combined CNA	non-codel	2	0.036696	0.012765	0.712592	1.04777	0.957299	0.931132	1.11555	1.76244	1.40677	1.02881	0.733636	0.008722	0.037556	0.009619	1.23399	1.06868	7.79809	2.40491	1.69232	1.218	1.92505	1.74334	3.25976	0.02579	0.058321	4.7568	6.63021	0.208634	2.41509	0.819682
TCGA-19-2631	213	1	FEMALE	Classic-like	WT	WHITE	Methylated	WT	Gain chr 7 & loss chr 10	non-codel	2	0.026666	0.114029	3.14624	1.20174	1.09805	1.07582	1.294	2.01667	1.62675	1.18063	1.17713	0.001581	0.983563	0.012866	1.41532	1.22572	8.94401	2.73354	1.82032	1.39698	2.19166	1.04668	0.129456	0.21946	0.045704	0.29472	0.042727	1.61389	0.001412	1.5206
TCGA-19-4065	214	0	MALE	NA	NA	WHITE	Unmethylated	NA	Gain chr 7 & loss chr 10	non-codel	2	0.002169	0.005105	3.64038	1.39228	1.27205	1.24841	1.41426	0.529177	1.83454	1.36781	1.35935	0.000421	0.000188	0.005594	1.63962	1.42006	3.92958	2.92373	2.13293	1.61847	0.737669	2.04003	0.138115	0.008227	0.009626	0.038599	0.022382	1.17593	0.001723	0.000696
TCGA-19-4068	137	0	FEMALE	Mesenchymal-like	WT	WHITE	Unmethylated	WT	NA	NA	2	0.045085	0.064366	2.9058	1.18244	1.08042	1.0555	1.26267	1.58899	1.59758	1.16166	1.15737	0.001159	0.584223	0.011814	1.39259	1.20604	8.79959	2.7144	1.90952	1.37454	1.8564	2.36622	1.33455	0.00846	0.030588	0.091207	0.078317	0.481009	0.1354	1.47899
TCGA-19-5947	202	1	FEMALE	Mesenchymal-like	WT	BLACK OR AFRICAN AMERICAN	Unmethylated	WT	Gain chr 7 & loss chr 10	non-codel	1	1.98335	2.94905	2.10419	0.87932	0.803448	0.786717	0.943224	1.10676	1.20511	0.863866	0.86131	4.69956	1.22289	10.945	1.03559	0.896864	6.54029	2.01739	1.42024	1.02217	1.61485	1.79187	2.7344	0.079648	0.128319	0.459807	0.46952	0.483126	1.54996	1.11565
TCGA-19-5950	523	1	FEMALE	Classic-like	WT	WHITE	Methylated	WT	Gain chr 7 & loss chr 10	non-codel	1	1.22827	1.82632	1.44057	0.544554	0.497496	0.490156	0.588914	0.916309	0.751676	0.534984	0.530451	2.91043	0.757325	10.2453	0.641334	0.555419	4.05286	1.25022	0.87954	0.633023	1.0005	1.55714	1.69418	17.4588	0.899579	3.37583	5.52901	7.05445	1.25518	0.69091
TCGA-19-5951	244	1	FEMALE	Classic-like	WT	WHITE	Unmethylated	WT	No combined CNA	non-codel	2	2.55076	3.79274	0.066087	1.13088	1.03323	1.0085	1.21381	0.655113	1.51364	0.832396	1.10271	6.03679	1.57274	3.06211	1.17817	1.02464	7.46848	2.59619	0.417057	1.31378	0.00829	0.676041	0.01118	0.028353	0.057053	0.006456	0.009944	0.08259	0.001077	1.43482
TCGA-19-5952	575	1	MALE	Mesenchymal-like	WT	WHITE	Unmethylated	WT	Gain chr 7 & loss chr 10	non-codel	1	1.38097	2.05338	1.61939	0.612255	0.559427	0.550204	0.658813	1.03023	0.845006	0.601495	0.599634	3.27226	0.851478	11.5182	0.721066	0.624471	4.55672	1.40565	0.988887	0.711722	1.1047	1.69341	1.9048	17.4745	1.01401	0.676409	6.20305	0.832426	1.41123	0.776806
TCGA-19-5953	144	1	MALE	Classic-like	WT	WHITE	Methylated	WT	Gain chr 7 & loss chr 10	non-codel	1	1.28203	1.90626	1.50363	0.56839	0.519347	0.509959	0.613753	0.956417	0.784578	0.558401	0.556749	3.03782	0.790474	10.6937	0.669406	0.579731	4.23026	1.30494	0.918039	0.660731	1.04429	1.56503	1.76833	18.2658	0.941246	3.51436	5.76426	2.95341	1.31012	0.721153
TCGA-19-5954	368	1	FEMALE	Mesenchymal-like	WT	WHITE	Methylated	WT	Gain chr 7 & loss chr 10	non-codel	1	1.28413	1.90939	1.50609	0.569322	0.520198	0.512074	0.614797	0.957985	0.785864	0.559316	0.557661	3.0428	0.791769	10.7113	0.670503	0.580681	4.23719	1.30708	0.919543	0.661814	1.046	1.57214	1.77123	18.3013	0.944857	2.70939	5.72519	3.63089	1.31227	0.722334
TCGA-19-5955	54	1	MALE	Mesenchymal-like	WT	WHITE	Methylated	WT	No combined CNA	non-codel	2	2.29779	3.38876	2.69665	1.01944	0.93148	0.91572	1.09892	1.71519	1.37122	1.00153	0.998563	1.03251	1.41776	0.206077	1.20062	1.03978	7.58722	2.34049	1.64656	1.18506	1.87266	2.35275	3.13302	0.216564	0.020469	0.993309	0.201342	1.89212	0.02283	1.29343
TCGA-19-5956	684	1	FEMALE	NA	NA	WHITE	Unmethylated	NA	No combined CNA	non-codel	2	0.14754	0.069244	2.2569	0.853137	0.779525	0.765039	0.922578	1.43555	1.15452	0.838144	0.835664	0.099597	0.899807	0.011048	1.00476	0.870159	6.34949	1.95868	1.37795	0.991738	1.56745	2.42188	2.65422	1.08288	0.029838	5.21955	8.55843	7.492	1.96645	1.08153
TCGA-19-5958	428	1	MALE	Mesenchymal-like	WT	WHITE	Unmethylated	WT	No combined CNA	non-codel	1	1.365	2.02962	1.58802	0.605172	0.552955	0.544199	0.65415	1.01819	0.83535	0.594537	0.592738	3.23441	0.841627	11.3858	0.712725	0.617247	4.50401	1.38939	0.977447	0.703489	1.11187	1.43369	1.88277	19.4538	0.641036	1.89276	4.81827	0.467793	1.3949	0.76782
TCGA-19-5959	511	1	FEMALE	Classic-like	WT	WHITE	Methylated	WT	Gain chr 7 & loss chr 10	non-codel	1	1.43491	2.13358	1.68294	0.636171	0.581279	0.5722	0.686103	1.07013	0.878139	0.62499	0.623141	3.40008	0.884738	11.969	0.749232	0.648864	4.73471	1.46055	1.02751	0.739523	1.13911	1.65225	1.21791	20.4633	0.984265	0.127675	1.70883	2.33302	0.012248	0.80715
TCGA-19-5960	455	1	MALE	Classic-like	WT	WHITE	Unmethylated	WT	Gain chr 7 & loss chr 10	non-codel	1	1.27372	1.89391	1.49388	0.564706	0.515981	0.508109	0.610708	0.950218	0.779493	0.554782	0.553141	3.01814	0.785351	10.6244	0.665067	0.575974	4.20284	1.29648	0.912089	0.656449	1.03752	1.42464	1.75687	18.0855	0.915932	3.35257	5.71273	3.93645	1.30163	0.716479
TCGA-19-A60I	541	0	MALE	Classic-like	WT	BLACK OR AFRICAN AMERICAN	Methylated	WT	Gain chr 7 & loss chr 10	non-codel	1	1.46074	2.17199	1.71323	0.647622	0.591743	0.581859	0.700336	1.08974	0.892406	0.636241	0.634358	3.46129	0.900664	12.1814	0.762719	0.660544	4.81994	1.48684	1.04601	0.752835	1.18986	1.85661	2.01483	2.72766	0.091427	3.99647	6.52842	8.45726	1.49275	0.821679
TCGA-19-A6J4	121	1	MALE	Mesenchymal-like	WT	BLACK OR AFRICAN AMERICAN	Unmethylated	WT	Gain chr 7 & loss chr 10	non-codel	1	1.37848	2.04967	1.61675	0.611151	0.558418	0.549131	0.660815	1.02833	0.842998	0.600411	0.598634	3.26636	0.849942	11.497	0.719766	0.623345	4.5485	1.40255	0.987104	0.710439	1.12285	1.67356	1.90137	8.9565	0.034047	3.75028	5.78445	7.7585	1.40868	0.775406
TCGA-19-A6J5	868	0	MALE	G-CIMP-high	Mutant	BLACK OR AFRICAN AMERICAN	Methylated	Mutant	Gain chr 7 & loss chr 10	non-codel	1	1.22576	1.82259	1.43763	0.543443	0.496552	0.489228	0.587713	0.914439	0.750142	0.533893	0.532313	2.90449	0.755779	10.2244	0.640025	0.554286	4.04459	1.24766	0.877745	0.631731	0.998455	1.55845	1.69072	17.4806	0.897457	3.36902	5.51773	7.10576	1.25262	0.689501
TCGA-26-1438	305	0	MALE	NA	NA	WHITE	Unmethylated	NA	No combined CNA	non-codel	1	1.226	1.82294	1.43791	0.543547	0.496648	0.488783	0.587789	0.914614	0.750286	0.533995	0.531948	2.90505	0.755924	10.2263	0.640147	0.554392	4.04536	1.2479	0.877913	0.631852	0.998646	1.55796	1.69104	17.4882	0.902117	3.36927	5.51663	7.09886	1.25286	0.689633
TCGA-26-1439	422	1	MALE	Mesenchymal-like	WT	WHITE	Unmethylated	WT	Gain chr 7 & loss chr 10	non-codel	1	1.41559	2.10485	1.66023	0.627602	0.57345	0.564121	0.675867	1.0449	0.866312	0.616573	0.614749	3.35429	0.872822	11.8078	0.739141	0.640125	4.67094	1.43951	1.01368	0.729563	1.15291	1.43537	1.95255	20.1346	0.140759	0.294143	2.28518	1.76049	1.4466	0.796279
TCGA-26-1440	296	0	MALE	NA	NA	WHITE	Unmethylated	NA	Gain chr 7 & loss chr 10	non-codel	1	1.22683	1.82418	1.43888	0.543914	0.496983	0.489544	0.588043	0.915196	0.750793	0.534355	0.52875	2.90701	0.756435	10.2332	0.64058	0.554767	4.04809	1.24875	0.878506	0.632279	0.99932	1.55901	1.69219	17.499	0.899852	3.31818	5.52251	7.08821	1.25371	0.690098
TCGA-26-1442	953	0	MALE	G-CIMP-high	Mutant	WHITE	Methylated	WT	No combined CNA	non-codel	1	1.23469	1.83587	1.44811	0.547403	0.50017	0.492178	0.591706	0.921102	0.755608	0.537783	0.536011	2.92565	0.761286	10.2989	0.644688	0.558325	4.07406	1.25676	0.884141	0.636334	1.00573	1.56402	1.70304	17.5689	0.906708	3.38051	5.54093	6.51053	1.26175	0.694524
TCGA-26-1443	217	0	FEMALE	NA	NA	WHITE	Methylated	NA	No combined CNA	non-codel	1	1.37493	2.0444	1.61259	0.609578	0.556981	0.547477	0.657584	1.02552	0.841311	0.598865	0.597093	3.25796	0.847755	11.4687	0.717914	0.621741	4.5368	1.3995	0.984564	0.70861	1.11996	1.42121	1.89647	14.8645	0.071022	3.49452	2.60392	5.70996	1.40506	0.77341
TCGA-26-1799	285	1	MALE	Mesenchymal-like	WT	WHITE	Unmethylated	NA	Gain chr 7 & loss chr 10	non-codel	1	1.24752	1.85494	1.46315	0.553088	0.505365	0.496961	0.598107	0.930668	0.762908	0.543368	0.541724	2.95604	0.769193	10.4058	0.651384	0.564123	4.11637	1.26981	0.893323	0.642943	1.01618	1.57043	1.72073	17.4495	0.059803	3.42874	5.23453	7.06707	1.27485	0.701738
TCGA-26-5132	286	0	MALE	Classic-like	WT	WHITE	Methylated	WT	Gain chr 7 & loss chr 10	non-codel	1	1.22712	1.82461	1.43922	0.544044	0.497101	0.488259	0.588326	0.91545	0.750971	0.534482	0.532865	2.9077	0.756614	10.2357	0.640732	0.554898	4.04906	1.24904	0.878715	0.632429	0.999558	1.56028	1.69259	17.4384	0.868867	3.37281	5.51592	7.11002	1.254	0.690262
TCGA-26-5133	452	0	MALE	LGm6-GBM	WT	WHITE	Unmethylated	WT	No combined CNA	non-codel	1	1.22621	1.82326	1.43816	0.543643	0.496735	0.488797	0.587857	0.914775	0.750418	0.534089	0.532509	2.90556	0.756057	10.2281	0.64026	0.55449	4.04607	1.24812	0.878068	0.631963	0.998822	1.55446	1.69134	17.478	0.901522	3.35858	5.51293	7.1073	1.25308	0.689754
TCGA-26-5134	167	0	MALE	Mesenchymal-like	WT	WHITE	Unmethylated	WT	No combined CNA	non-codel	1	1.24017	1.84401	1.45453	0.549829	0.502388	0.493488	0.594619	0.925149	0.758849	0.540166	0.538532	2.93862	0.764661	10.3445	0.647546	0.5608	4.09211	1.26233	0.88806	0.639155	1.01019	1.53586	1.71059	16.8966	0.706539	3.3656	5.53716	7.1711	1.26734	0.697603
TCGA-26-5135	270	1	FEMALE	Mesenchymal-like	WT	WHITE	Methylated	WT	Gain chr 7 & loss chr 10	non-codel	2	2.41573	3.54011	2.2552	1.0713	0.97886	0.96336	1.14781	1.80258	1.44982	1.05247	1.04759	1.10916	1.48988	0.200104	1.26169	1.09267	7.97314	2.45954	1.73031	1.24534	1.9626	0.763907	2.84054	0.118582	0.087977	0.280387	0.096081	0.284414	0.389024	1.35922
TCGA-26-5136	577	1	FEMALE	Mesenchymal-like	WT	WHITE	Methylated	WT	Gain chr 7 & loss chr 10	non-codel	1	1.29008	1.91822	1.51306	0.571957	0.522606	0.513763	0.616622	0.962381	0.789501	0.561905	0.560205	3.05688	0.795434	10.7608	0.673606	0.583369	4.2568	1.31313	0.923799	0.664877	1.05084	1.62061	1.77943	18.309	0.032919	2.29338	3.29431	7.03874	1.31834	0.725678
TCGA-26-5139	48	0	FEMALE	Mesenchymal-like	WT	WHITE	Unmethylated	WT	Gain chr 7 & loss chr 10	non-codel	1	1.32316	1.96742	1.55187	0.586626	0.536009	0.527599	0.629452	0.976366	0.80975	0.576317	0.574611	3.13529	0.815835	11.0368	0.690882	0.598331	4.36598	1.34665	0.947492	0.681929	1.07779	1.63101	1.82495	18.8615	0.21071	2.75182	4.55705	2.856	1.35157	0.744289
TCGA-26-6173	241	0	MALE	Mesenchymal-like	WT	WHITE	Unmethylated	WT	No combined CNA	non-codel	1	1.25853	1.87132	1.47606	0.557971	0.509826	0.501495	0.601691	0.938884	0.770196	0.548165	0.546395	2.98213	0.775983	10.4977	0.657134	0.569104	4.15271	1.28102	0.90121	0.648619	1.02515	1.57287	1.73592	17.9324	0.867553	3.15525	5.61952	5.07836	1.28611	0.707933
TCGA-26-6174	71	0	FEMALE	Mesenchymal-like	WT	WHITE	Methylated	WT	No combined CNA	non-codel	1	1.29517	1.92579	1.51903	0.574213	0.52463	0.516246	0.618068	0.965798	0.79254	0.564122	0.558469	3.06895	0.798572	10.8033	0.676264	0.58567	4.2736	1.31827	0.927444	0.6675	1.05499	1.53349	1.78645	16.7014	0.952369	3.48352	5.80359	3.87753	1.32354	0.728541
TCGA-26-A7UX	588	0	MALE	Mesenchymal-like	WT	BLACK OR AFRICAN AMERICAN	Methylated	WT	NA	non-codel	1	1.47226	2.18911	1.72673	0.652727	0.596364	0.586661	0.705813	1.09833	0.900087	0.641256	0.639359	3.48857	0.907763	12.2753	0.768731	0.665751	4.85794	1.49856	1.05426	0.758769	1.19924	1.87172	2.03072	1.01074	0.981463	4.04578	6.61481	8.53341	1.50452	0.828156
TCGA-27-1830	154	1	MALE	Mesenchymal-like	WT	WHITE	Unmethylated	WT	Gain chr 7 & loss chr 10	non-codel	1	1.27071	1.88943	1.49035	0.563372	0.514762	0.506685	0.609228	0.947862	0.777651	0.553471	0.551834	3.011	0.783495	10.5993	0.663496	0.574613	4.19291	1.29342	0.909934	0.654898	1.03507	1.55527	1.75272	18.1265	0.934983	3.20306	4.86362	4.9042	1.29855	0.714786
TCGA-27-1831	505	1	MALE	Mesenchymal-like	WT	WHITE	Unmethylated	WT	Gain chr 7 & loss chr 10	non-codel	1	1.22761	1.82534	1.4398	0.544263	0.497302	0.490002	0.588528	0.915819	0.751274	0.534698	0.533116	2.90887	0.75692	10.2398	0.640991	0.555122	4.05069	1.24955	0.87907	0.632684	0.999961	1.55997	1.69327	17.5116	0.903306	3.36133	5.51311	6.99315	1.25451	0.690541
TCGA-27-1832	300	1	FEMALE	Mesenchymal-like	WT	WHITE	Unmethylated	WT	Gain chr 7 & loss chr 10	non-codel	1	1.24976	1.85828	1.46578	0.554083	0.506274	0.497744	0.599182	0.932342	0.764829	0.544345	0.542734	2.96136	0.770576	10.4246	0.652555	0.565138	4.12377	1.27209	0.89493	0.644099	1.018	1.46417	1.72382	17.7902	0.409851	3.3864	5.513	6.11738	1.27714	0.703
TCGA-27-1833	737	1	FEMALE	Classic-like	WT	WHITE	Unmethylated	WT	Gain chr 7 & loss chr 10	non-codel	1	1.23802	1.84082	1.45201	0.548877	0.501518	0.493721	0.59359	0.923583	0.757643	0.539231	0.537636	2.93353	0.763337	10.3266	0.646425	0.559829	4.08503	1.26014	0.886522	0.638048	1.00844	1.55761	1.70763	17.6601	0.910927	3.39716	5.5613	6.20642	1.26514	0.696395
TCGA-27-1834	1233	1	MALE	Mesenchymal-like	WT	WHITE	Methylated	WT	Gain chr 7 & loss chr 10	non-codel	1	1.26826	1.88579	1.48748	0.562285	0.513768	0.503515	0.605897	0.946144	0.776151	0.552403	0.550731	3.00519	0.781983	10.5789	0.662215	0.573504	4.18482	1.29092	0.908178	0.653634	1.03307	1.59818	1.74934	17.9284	0.835812	3.36264	5.70866	4.38282	1.29605	0.713406
TCGA-27-1835	648	1	FEMALE	Mesenchymal-like	WT	WHITE	Methylated	WT	Gain chr 7 & loss chr 10	non-codel	1	1.22604	1.82301	1.43796	0.543566	0.496665	0.489374	0.587845	0.914646	0.750312	0.534013	0.532433	2.90515	0.75595	10.2267	0.640169	0.554411	4.0455	1.24795	0.877943	0.631874	0.99868	1.55895	1.6911	17.4892	0.902148	3.36985	5.51897	7.07684	1.2529	0.689656
TCGA-27-1836	914	1	FEMALE	Mesenchymal-like	WT	WHITE	Methylated	WT	No combined CNA	non-codel	1	1.24355	1.84904	1.45849	0.551328	0.503757	0.496363	0.59624	0.927707	0.761026	0.541639	0.540036	2.94663	0.766745	10.3727	0.649311	0.562328	4.10327	1.26577	0.89048	0.640897	1.01294	1.58121	1.71525	17.7389	0.915031	3.39633	5.59778	5.77226	1.27079	0.699504
TCGA-27-1837	427	1	MALE	Mesenchymal-like	WT	WHITE	Methylated	WT	No combined CNA	non-codel	1	1.63634	2.43309	1.91918	0.725474	0.662877	0.651517	0.78184	1.22069	0.991056	0.712724	0.70913	3.87737	1.00893	13.2791	0.854406	0.739949	5.39935	1.66558	1.17175	0.843335	1.33289	1.51158	2.25704	0.54353	0.306332	2.70548	7.01029	2.89854	1.67219	0.920454
TCGA-27-1838	350	1	FEMALE	Mesenchymal-like	WT	WHITE	Unmethylated	WT	Gain chr 7 & loss chr 10	non-codel	2	1.9399	2.88292	2.26043	0.860057	0.785847	0.768346	0.925288	1.44714	1.15758	0.844942	0.842442	3.28374	1.1961	0.392736	1.01291	0.877217	6.40099	1.97456	1.38913	0.999782	1.58016	0.967734	2.67575	0.381008	0.018829	5.29467	8.52215	0.624416	1.9824	1.09121
TCGA-27-2518	753	1	MALE	Classic-like	WT	WHITE	Unmethylated	WT	Gain chr 7 & loss chr 10	non-codel	1	1.22805	1.82599	1.44031	0.544456	0.497478	0.489276	0.587944	0.916071	0.75154	0.534887	0.533305	2.9099	0.757187	10.2434	0.641217	0.555319	4.05212	1.24999	0.879381	0.632908	1.00032	1.54661	1.69387	17.5124	0.896395	3.29263	5.47693	7.09526	1.25495	0.690785
TCGA-27-2519	550	1	MALE	Mesenchymal-like	WT	WHITE	Unmethylated	WT	Gain chr 7 & loss chr 10	non-codel	1	1.26804	1.88545	1.48721	0.562185	0.513677	0.50584	0.60761	0.945901	0.775901	0.552305	0.550671	3.00466	0.781844	10.577	0.662097	0.573402	4.18407	1.29069	0.908016	0.653517	1.03289	1.60893	1.74903	18.0879	0.93305	2.78689	5.70653	4.60489	1.29582	0.713279
TCGA-27-2521	510	1	MALE	G-CIMP-low	Mutant	WHITE	Methylated	Mutant	No combined CNA	non-codel	1	1.24477	1.85085	1.45992	0.551869	0.504252	0.495136	0.595768	0.928618	0.761737	0.542171	0.540566	2.94953	0.767498	10.3829	0.649949	0.56288	4.1073	1.26701	0.891355	0.641526	1.01394	1.57299	1.71694	17.6105	0.01414	2.9691	5.57557	7.20682	1.27204	0.700191
TCGA-27-2523	489	1	MALE	Classic-like	WT	WHITE	Methylated	WT	Gain chr 7 & loss chr 10	non-codel	1	1.22577	1.8226	1.43764	0.543446	0.496555	0.488369	0.587285	0.914444	0.750146	0.533895	0.532315	2.9045	0.755783	10.2244	0.640028	0.554289	4.04461	1.24767	0.877749	0.631734	0.998459	1.55831	1.69073	17.4853	0.901949	3.36792	5.51775	7.104	1.25263	0.689504
TCGA-27-2524	231	1	MALE	Mesenchymal-like	WT	WHITE	Unmethylated	WT	Gain chr 7 & loss chr 10	non-codel	1	1.2606	1.87439	1.47849	0.558887	0.510664	0.501913	0.602938	0.940426	0.77146	0.549065	0.54744	2.98703	0.777257	10.5149	0.658213	0.570038	4.15953	1.28312	0.902689	0.649684	1.02683	1.58247	1.73877	17.9179	0.927539	3.06003	5.66456	4.9774	1.28822	0.709095
TCGA-27-2526	87	1	FEMALE	Mesenchymal-like	WT	WHITE	Unmethylated	WT	No combined CNA	non-codel	1	1.47505	2.19326	1.72267	0.653966	0.597539	0.587817	0.706331	1.10041	0.902703	0.642473	0.640485	3.49519	0.909486	12.3038	0.77019	0.667014	4.86715	1.50141	1.05626	0.760209	1.20138	0.910825	2.03388	20.9834	0.147289	0.578182	0.156488	0.364965	1.38531	0.829728
TCGA-27-2527	438	1	MALE	Mesenchymal-like	WT	WHITE	Methylated	WT	No combined CNA	non-codel	1	1.33825	1.98986	1.56819	0.593315	0.542121	0.533184	0.638629	0.997691	0.818944	0.582888	0.581163	3.17104	0.825138	11.1627	0.69876	0.605153	4.41576	1.36216	0.958296	0.689705	1.09008	1.10012	1.84588	18.939	0.348823	3.34453	5.85358	0.497199	1.36757	0.752776
TCGA-27-2528	480	1	MALE	Classic-like	WT	WHITE	Methylated	WT	No combined CNA	non-codel	1	1.23681	1.83903	1.45059	0.548343	0.501029	0.492878	0.591381	0.893882	0.756905	0.538706	0.537112	2.93068	0.762593	10.3166	0.645795	0.559283	4.08105	1.25891	0.885659	0.637426	1.00746	1.53363	1.70596	17.6375	0.906453	3.06171	5.55045	6.70611	1.26391	0.695717
TCGA-28-1745	345	0	MALE	Mesenchymal-like	WT	WHITE	Unmethylated	NA	NA	NA	1	2.03426	3.02476	2.38344	0.901893	0.824074	0.808879	0.967616	1.51736	1.2227	0.886043	0.882408	4.82027	1.25428	12.5685	1.06218	0.919888	6.71236	2.07061	1.4561	1.04842	1.65047	1.2202	0.82461	0.082378	0.022319	0.21762	0.031856	0.627678	0.04485	1.14429
TCGA-28-1746	6	0	FEMALE	Mesenchymal-like	WT	WHITE	Methylated	NA	Gain chr 7 & loss chr 10	non-codel	2	1.69295	2.51726	1.98558	0.750572	0.68576	0.675099	0.811715	1.26297	0.985721	0.737382	0.692256	4.01057	1.04384	4.58565	0.883966	0.765548	5.58615	1.7232	1.21229	0.872511	1.37901	2.13072	2.33513	0.998763	1.00223	4.65235	7.60689	4.76794	1.73005	0.952299
TCGA-28-1749	280	0	MALE	Classic-like	WT	WHITE	Unmethylated	NA	Gain chr 7 & loss chr 10	non-codel	2	0.630463	0.10421	2.80901	1.0725	0.979536	0.962955	1.15122	1.80425	1.4185	1.05365	1.04968	0.006396	1.43054	0.017656	1.26311	1.0939	7.98211	2.46138	1.73226	1.24674	1.97048	2.10596	3.18689	0.044763	0.050976	4.80776	0.156241	0.70633	0.269627	1.36068
TCGA-28-1750	254	0	FEMALE	Classic-like	WT	WHITE	Unmethylated	NA	Gain chr 7 & loss chr 10	non-codel	1	1.24375	1.84933	1.45872	0.551415	0.503764	0.496077	0.595897	0.927818	0.761147	0.541725	0.451814	2.9471	0.766867	10.3744	0.649414	0.562417	4.10392	1.26597	0.890622	0.640998	1.0131	1.56495	1.71552	17.7418	0.026093	3.34044	5.49594	6.97065	1.271	0.699616
TCGA-28-1751	232	0	FEMALE	Mesenchymal-like	WT	WHITE	Unmethylated	NA	Gain chr 7 & loss chr 10	non-codel	1	1.55289	2.30901	1.82131	0.688477	0.629072	0.619156	0.743652	1.15844	0.947838	0.676378	0.674331	3.67964	0.957482	12.9462	0.810834	0.702214	5.124	1.58064	1.112	0.800327	1.26492	1.73534	2.14194	6.1206	0.054024	2.81363	1.94539	6.21476	1.58692	0.873514
TCGA-28-1752	258	0	FEMALE	Mesenchymal-like	WT	WHITE	Methylated	NA	Gain chr 7 & loss chr 10	non-codel	2	2.14049	3.14251	2.50668	0.952195	0.869972	0.854811	1.02951	1.60224	1.26926	0.935461	0.887398	0.683887	1.32424	0.146082	1.12142	0.971193	7.08673	2.18603	1.53794	1.10689	1.74944	2.08941	2.9624	1.87646	0.033509	3.708	1.66917	0.819834	2.19377	1.20811
TCGA-28-1755	47	1	FEMALE	Mesenchymal-like	WT	WHITE	Unmethylated	NA	No combined CNA	non-codel	2	2.1451	3.18557	2.5145	0.951059	0.868935	0.850461	1.01729	1.59976	1.26159	0.934345	0.931266	3.47316	1.32266	0.293436	1.12008	0.970035	7.07828	2.18349	1.53611	1.10557	1.74736	1.69244	2.9588	0.066799	0.020013	3.66016	0.64581	1.175	2.19159	1.20667
TCGA-28-1757	4	0	MALE	Mesenchymal-like	WT	WHITE	Methylated	NA	Gain chr 7 & loss chr 10	non-codel	2	1.74122	2.58904	2.04219	0.771973	0.705364	0.693888	0.832972	1.29873	1.03627	0.758406	0.756111	4.08229	1.0736	0.897388	0.90917	0.787376	5.74543	1.77228	1.24686	0.897388	1.41833	2.15292	2.40171	0.040411	0.137314	3.35418	7.01845	10.0403	1.77937	0.979451
TCGA-28-1760	143	0	MALE	Mesenchymal-like	WT	WHITE	Unmethylated	NA	NA	NA	2	2.25346	3.34792	2.64297	0.999075	0.912871	0.897359	1.08007	1.68092	1.33762	0.981518	0.902904	4.84343	1.38944	0.629538	1.17663	1.01901	7.43564	2.29373	1.61366	1.16138	1.71782	1.68515	1.91201	0.023259	0.021728	0.111195	0.097855	2.75327	0.017089	1.26759
TCGA-41-2571	26	1	MALE	Mesenchymal-like	WT	WHITE	Unmethylated	WT	Gain chr 7 & loss chr 10	non-codel	1	1.3458	2.00108	1.57491	0.596662	0.545061	0.534102	0.640339	1.00186	0.823248	0.586176	0.584244	3.18892	0.829792	11.2256	0.702702	0.608567	4.43909	1.3309	0.963702	0.693596	1.09623	1.61875	1.85629	19.183	0.990192	2.74963	5.37611	0.509307	1.37529	0.757023
TCGA-41-2572	406	1	MALE	Classic-like	WT	WHITE	Unmethylated	WT	Gain chr 7 & loss chr 10	non-codel	2	1.22129	0.281297	2.26596	0.856561	0.782483	0.769977	0.924187	1.44052	1.13431	0.841508	0.833981	0.022362	1.18881	0.020822	1.00879	0.873651	6.37497	1.96654	1.38348	0.995718	1.57374	2.2848	2.66487	0.031762	0.039381	3.92787	8.13099	8.87007	1.97435	1.08677
TCGA-41-2573	272	0	MALE	Mesenchymal-like	WT	WHITE	Methylated	WT	Gain chr 7 & loss chr 10	non-codel	2	1.83657	0.89997	2.27771	0.861004	0.786542	0.774312	0.931085	1.44879	1.15214	0.845872	0.843313	0.040678	1.19736	0.028416	1.01402	0.878183	6.40804	1.97674	1.39065	1.00088	1.5819	2.30997	2.67869	0.5945	0.120356	5.17455	8.27783	4.90907	1.98459	1.09241
TCGA-41-2575	290	1	MALE	Mesenchymal-like	WT	WHITE	Unmethylated	WT	Gain chr 7 & loss chr 10	non-codel	2	1.99028	2.95935	2.334	0.882391	0.806138	0.791738	0.954038	1.48478	1.17178	0.866884	0.862453	4.68152	1.22716	1.18618	1.03921	0.899996	6.56721	2.02584	1.4252	1.02574	1.62119	1.92626	2.74523	0.125765	0.017249	4.39406	3.18671	1.88808	2.03388	1.11955
TCGA-41-3392	30	1	MALE	Classic-like	WT	WHITE	Unmethylated	WT	Gain chr 7 & loss chr 10	non-codel	2	0.528461	0.401707	2.57451	0.973196	0.889224	0.872636	1.05228	1.63757	1.30497	0.956093	0.925102	0.007267	1.34612	0.016298	1.14615	0.992613	7.24303	2.23431	1.57186	1.1313	1.78803	2.3966	3.02767	0.054054	0.027266	5.74074	0.673187	4.56816	2.24113	1.23476
TCGA-41-3393	135	1	FEMALE	Classic-like	WT	WHITE	Unmethylated	WT	Gain chr 7 & loss chr 10	non-codel	2	1.91558	2.77685	2.24694	0.849372	0.776085	0.761551	0.913513	1.42911	1.13725	0.834445	0.830068	1.38809	1.18124	0.140307	1.00032	0.866319	6.32147	1.94992	1.37187	0.987362	1.56053	2.27315	2.6425	0.115644	0.019721	1.49701	6.69352	8.43424	1.95778	1.07765
TCGA-41-3915	360	1	MALE	Mesenchymal-like	WT	WHITE	Methylated	WT	Gain chr 7 & loss chr 10	non-codel	2	1.64789	2.45026	1.93272	0.730594	0.667507	0.656743	0.789964	1.22935	0.966337	0.717754	0.673878	3.90435	1.01605	4.55376	0.860436	0.745171	5.43746	1.67733	1.18002	0.849286	1.3423	2.07121	2.27297	0.226317	1.11346	4.03091	7.38799	8.475	1.68399	0.92695
TCGA-41-4097	6	1	FEMALE	Classic-like	WT	WHITE	Unmethylated	WT	No combined CNA	non-codel	2	0.564895	0.453435	2.60215	0.983646	0.898318	0.884281	1.06371	1.65444	1.29799	0.96636	0.884931	0.007577	1.36525	0.023984	1.15846	1.00327	7.32081	2.25753	1.58874	1.14345	1.80723	2.56355	3.06025	0.433036	0.069068	2.83656	2.84079	4.32652	2.26714	1.24801
TCGA-41-5651	460	1	FEMALE	Classic-like	WT	BLACK OR AFRICAN AMERICAN	Methylated	WT	Gain chr 7 & loss chr 10	non-codel	2	1.76473	2.61693	2.06982	0.782417	0.714907	0.703741	0.84605	1.31655	1.046	0.768667	0.766392	2.49178	1.08813	0.232513	0.92147	0.798028	5.82315	1.79631	1.26373	0.909529	1.43752	2.20468	2.4342	0.665851	0.01129	4.72836	7.8769	8.50031	1.80345	0.992702
TCGA-4W-AA9R	124	0	MALE	Classic-like	WT	BLACK OR AFRICAN AMERICAN	Methylated	WT	NA	non-codel	1	1.60611	2.38814	0.385086	0.712071	0.650584	0.63934	0.75507	1.15288	0.982909	0.699275	0.690807	3.80574	0.990295	13.397	0.837211	0.725997	5.29914	1.63481	0.786638	0.827755	0.092688	0.665544	0.013317	22.7217	0.054078	0.016326	0.013324	0.118252	0.002275	0.90345
TCGA-4W-AA9S	44	0	MALE	Classic-like	WT	BLACK OR AFRICAN AMERICAN	Methylated	WT	NA	non-codel	1	1.4644	2.17743	1.71752	0.649244	0.593224	0.584045	0.702132	1.09242	0.893482	0.637834	0.635947	3.46995	0.902919	12.2128	0.764629	0.662198	4.83201	1.49057	1.04863	0.75472	1.19284	1.82291	2.01988	4.51417	0.178624	3.95178	6.56364	6.43839	1.49649	0.823737
TCGA-4W-AA9T	778	0	FEMALE	Classic-like	WT	BLACK OR AFRICAN AMERICAN	Methylated	Mutant	NA	non-codel	1	1.41218	2.09978	1.65627	0.62609	0.572068	0.563216	0.675644	1.05351	0.863355	0.615087	0.613267	3.3462	0.870718	11.7743	0.73736	0.638582	4.65969	1.43741	1.01123	0.727805	1.1503	1.79215	1.94784	5.97879	0.050526	3.85991	6.34818	8.1802	1.44312	0.79436
TCGA-81-5910	49	1	MALE	Mesenchymal-like	WT	WHITE	Unmethylated	WT	Gain chr 7 & loss chr 10	non-codel	1	1.31779	1.95943	1.54553	0.584243	0.533832	0.525147	0.62898	0.983093	0.806461	0.573976	0.572277	3.12255	0.812521	10.992	0.688076	0.5959	4.34824	1.34134	0.943644	0.67916	1.07342	1.62358	1.81766	18.6015	0.246474	3.61296	5.89724	1.1544	1.34666	0.741266
TCGA-81-5911	539	0	MALE	Classic-like	WT	WHITE	Unmethylated	WT	Gain chr 7 & loss chr 10	non-codel	2	0.006923	0.007724	1.33524	1.278	1.16773	1.14535	1.37282	2.14987	1.7244	1.25537	1.25089	0.000274	0.002888	0.005042	1.50513	1.3035	9.51152	2.89778	1.71309	1.48562	1.72153	1.08574	0.08218	0.097893	0.021075	0.082606	0.022297	0.229796	0.000808	0.089103
TCGA-87-5896	800	0	FEMALE	Classic-like	WT	WHITE	Unmethylated	WT	Gain chr 7 & loss chr 10	non-codel	2	0.086751	0.006749	2.54271	0.961177	0.877989	0.855001	1.02957	0.983213	1.27348	0.944285	0.928156	0.081074	0.067884	0.006776	1.132	0.980355	7.07865	2.06644	1.55245	1.11733	0.097185	2.6936	2.99034	0.005663	0.006933	0.192636	7.22407	11.7956	0.123983	1.21722
TCGA-OX-A56R	180	1	MALE	Mesenchymal-like	WT	BLACK OR AFRICAN AMERICAN	Methylated	WT	Gain chr 7 & loss chr 10	non-codel	1	1.22646	1.82364	1.43846	0.543754	0.496837	0.488646	0.587079	0.914927	0.7505	0.534198	0.532402	2.90615	0.756212	10.2302	0.640391	0.554603	4.0469	1.24838	0.878248	0.632093	0.999026	1.55841	1.69169	17.4945	0.902461	3.36969	5.52017	7.06169	1.25334	0.689895
TCGA-RR-A6KA	191	1	FEMALE	Mesenchymal-like	WT	BLACK OR AFRICAN AMERICAN	Methylated	WT	No combined CNA	non-codel	1	1.29021	1.91842	1.51321	0.572014	0.522621	0.514155	0.616797	0.962515	0.789278	0.561962	0.559808	3.05719	0.795514	10.7619	0.673674	0.583427	4.25723	1.31326	0.923892	0.664944	1.05095	1.58543	1.77961	18.1143	0.016128	2.71597	5.36944	4.80407	1.31848	0.725751
TCGA-RR-A6KC	625	1	MALE	Classic-like	WT	BLACK OR AFRICAN AMERICAN	Unmethylated	WT	Gain chr 7 & loss chr 10	non-codel	1	1.24522	1.85153	1.46045	0.552069	0.504434	0.496446	0.597041	0.928954	0.76194	0.542367	0.540762	2.95059	0.767776	10.3867	0.650184	0.563084	4.10879	1.26747	0.891678	0.641758	1.0143	1.56429	1.71756	17.0909	0.453079	3.42257	5.59072	6.7991	1.2725	0.700445
