# Supplementary material for: Clinical Significance and Molecular Annotation of Cellular Morphometric Subtypes in Lower Grade Gliomas discovered by Machine Learning: a retrospective multicentric study
Source: Research Square preprint supplement (doi:10.21203/rs.3.rs-770415/v1), 2021-08-12
Supplement: Supplementary file 7 [file 8f41db1e64c8caa91b42060d.xlsx]

## Sheet: TableS7-TCGA-LGG-CMC_Treatment_
Supplementary Table 7 Metadata and cellular morphometric representation of patients in TCGA-LGG cohort. (CMB: cellular morphometric biomaker; Only CMBs with top 30 largest variations were used for patient-level representation)
ID	OS.time(Day)	OS	subtype	gender	histological_type	age_at_initial_pathologic_diagnosis	laterality	neoplasm_histologic_grade	IDH.status	X1p.19q.codeletion	MGMT.promoter.status	TERT.promoter.status	ATRX.status	Drug therapy	Radiation therapy	Primary therapy response	Follow-up treatment response	CMB_168	CMB_89	CMB_166	CMB_131	CMB_116	CMB_2	CMB_140	CMB_197	CMB_17	CMB_43	CMB_202	CMB_210	CMB_83	CMB_23	CMB_162	CMB_145	CMB_139	CMB_115	CMB_208	CMB_152	CMB_147	CMB_72	CMB_6	CMB_196	CMB_177	CMB_144	CMB_223	CMB_245	CMB_30	CMB_181
TCGA-CS-4938	3574	0	2	FEMALE	Astrocytoma	31	Right	G2	Mutant	non-codel	Unmethylated	WT	Mutant	NA	NA	Non-response	Non-response	0.1298	0.1731	2.4108	0.9113	0.8327	0.8181	0.9809	0.6254	1.2212	0.8953	0.8925	0.1281	1.2399	0.0168	1.0733	0.9295	6.7819	2.0923	1.4719	1.0594	1.6743	2.5406	2.8352	0.0096	0.0227	5.6263	9.1945	3.2084	2.1006	1.1562
TCGA-CS-4941	234	1	2	MALE	Astrocytoma	67	Right	G3	WT	non-codel	Methylated	Mutant	WT	YES	YES	Non-response	Non-response	1.7289	2.5567	2.0278	0.7665	0.7	0.687	0.8289	1.2898	1.0099	0.7531	0.2262	4.0945	1.066	0.2569	0.9028	0.7818	5.7049	1.7598	1.2381	0.8911	1.4083	2.1901	2.3848	0.2885	1.2541	4.731	7.7625	9.9756	1.7668	0.9725
TCGA-CS-4942	1335	1	2	FEMALE	Astrocytoma	44	Right	G3	Mutant	non-codel	Unmethylated	WT	Mutant	YES	YES	Non-response	Non-response	0.0338	0.0336	2.4898	0.9412	0.86	0.8414	1.0094	1.4341	1.2383	0.9246	0.8218	0.0153	0.1905	0.0077	1.1084	0.9599	7.0046	2.1026	1.5201	1.0941	1.7292	2.5097	2.9281	0.0049	0.012	2.4499	8.645	6.3561	2.1694	1.1351
TCGA-CS-4943	1106	1	1	MALE	Astrocytoma	37	Left	G3	Mutant	non-codel	Methylated	WT	Mutant	YES	NA	NA	NA	1.5787	2.3474	1.8516	0.6999	0.6395	0.627	0.7568	1.1777	0.9531	0.6876	0.6838	3.7408	0.9734	12.6902	0.8243	0.7139	5.2092	1.6067	1.1305	0.8136	1.2859	1.9565	2.1775	0.6537	0.0248	4.0553	7.045	4.5549	1.6133	0.888
TCGA-CS-4944	1828	0	1	MALE	Astrocytoma	50	Right	G2	Mutant	non-codel	Methylated	Mutant	WT	NA	YES	Non-response	Non-response	1.2262	1.8233	1.4382	0.5437	0.4967	0.4892	0.5879	0.9148	0.7504	0.5341	0.5279	2.9056	0.7561	10.2284	0.6403	0.5545	4.0462	1.2482	0.8781	0.632	0.9988	1.5578	1.6914	17.4914	0.9023	3.3703	5.5199	7.1085	1.2531	0.6898
TCGA-CS-5393	1222	0	2	MALE	Astrocytoma	39	Left	G3	Mutant	non-codel	Methylated	WT	WT	YES	YES	Response	Response	0.8759	0.5831	2.1186	0.8008	0.7317	0.7192	0.8641	1.3476	1.068	0.7868	0.7841	1.9631	1.1097	0.016	0.9432	0.8168	5.9603	1.8386	1.2935	0.9309	1.4714	2.2669	2.4915	0.102	1.1159	4.9635	8.1042	9.8052	1.8459	1.0161
TCGA-CS-5394	8	0	2	MALE	Astrocytoma	40	Left	G3	Mutant	non-codel	Methylated	WT	WT	NA	NA	NA	NA	1.767	2.5174	2.075	0.7844	0.7166	0.7056	0.848	1.3198	1.0531	0.7706	0.7683	1.816	1.0908	0.0677	0.9238	0.8	5.8376	1.8008	1.2669	0.9118	1.4411	2.2347	2.4402	0.1038	1.278	4.8627	7.9447	8.3608	1.8079	0.9952
TCGA-CS-5395	639	1	2	MALE	Oligodendroglioma	43	Right	G2	WT	non-codel	Unmethylated	Mutant	WT	YES	YES	Non-response	Non-response	1.7331	0.2031	2.0553	0.7769	0.7099	0.6989	0.8402	1.3074	1.0359	0.7633	0.5999	3.4998	1.0805	0.0517	0.915	0.7924	5.7824	1.7827	1.2549	0.9032	1.4275	2.2234	2.4172	0.2381	1.031	4.816	7.8783	10.0799	1.7908	0.9858
TCGA-CS-5396	1631	0	1	FEMALE	Oligodendroglioma	53	Right	G3	Mutant	codel	Methylated	Mutant	WT	YES	YES	Response	Non-response	1.5	2.2303	1.7593	0.665	0.6075	0.5983	0.7192	1.119	0.8851	0.6533	0.6514	3.5543	0.9249	11.5285	0.7832	0.6783	4.9494	1.5268	1.0741	0.7731	1.2218	1.904	2.069	0.1741	1.0025	4.1226	6.7456	8.6941	1.5329	0.8438
TCGA-CS-5397	194	1	2	FEMALE	Astrocytoma	54	Left	G3	WT	non-codel	Unmethylated	Mutant	WT	YES	YES	Non-response	NA	1.7283	2.1856	2.0318	0.768	0.7017	0.6903	0.8306	1.2923	1.0082	0.7546	0.5316	3.3865	1.0681	0.073	0.9045	0.7834	5.7162	1.7633	1.2405	0.8928	1.4111	2.1971	2.3895	0.032	1.1219	4.7604	7.782	9.9934	1.7703	0.9745
TCGA-CS-6186	538	1	1	MALE	Oligoastrocytoma	58	Right	G3	WT	non-codel	Unmethylated	Mutant	WT	YES	YES	Non-response	Non-response	1.4659	2.1797	1.7193	0.6499	0.5938	0.5834	0.7029	1.0936	0.8959	0.6385	0.6364	3.4735	0.9038	12.2051	0.7654	0.6629	4.837	1.4921	1.0497	0.7555	1.1941	1.8549	2.022	1.8359	0.6559	4.0291	6.5828	8.4768	1.498	0.8246
TCGA-CS-6188	814	1	1	MALE	Astrocytoma	48	Right	G3	WT	non-codel	Unmethylated	Mutant	WT	YES	YES	Non-response	NA	1.2268	1.8242	1.4389	0.5439	0.4969	0.4893	0.5882	0.9152	0.7355	0.5343	0.5328	2.907	0.7564	10.2331	0.6406	0.5548	4.048	1.2487	0.8785	0.6323	0.9993	1.558	1.6922	17.4995	0.9027	3.367	5.5214	7.1111	1.2537	0.6901
TCGA-CS-6290	1137	1	2	MALE	Astrocytoma	31	Left	G3	Mutant	non-codel	Methylated	WT	WT	YES	YES	Non-response	NA	1.7689	2.6219	2.0748	0.7843	0.7165	0.7039	0.846	1.3196	1.034	0.7705	0.7682	1.9245	1.0908	0.139	0.9237	0.8	5.8373	1.7993	1.2668	0.9117	1.441	2.2058	2.4401	0.03	0.0547	4.8533	7.7996	9.6267	1.8078	0.9951
TCGA-CS-6665	1568	0	2	FEMALE	Astrocytoma	51	Right	G3	Mutant	non-codel	Methylated	WT	WT	YES	YES	Non-response	Non-response	1.708	2.4978	2.0355	0.7695	0.703	0.6909	0.8321	1.2947	1.0216	0.7559	0.7347	1.8527	1.0701	0.0438	0.9062	0.7848	5.7267	1.7666	1.2428	0.8945	1.4137	2.2031	2.3939	0.5718	1.191	4.7695	7.8039	10.0585	1.7736	0.9763
TCGA-CS-6666	1428	0	2	MALE	Astrocytoma	22	Right	G3	Mutant	non-codel	Methylated	WT	Mutant	YES	YES	Response	Response	1.7763	1.8731	2.1051	0.7958	0.727	0.7156	0.8603	1.339	1.0674	0.7818	0.7794	0.2168	1.1067	0.0307	0.9372	0.8116	5.9225	1.8269	1.2853	0.925	1.462	2.2633	2.4757	0.1831	0.5832	4.9279	8.0333	10.0364	1.8342	1.0096
TCGA-CS-6667	1469	0	2	FEMALE	Astrocytoma	39	Left	G2	Mutant	non-codel	Methylated	WT	WT	NA	YES	Non-response	Non-response	1.7397	0.4893	2.0816	0.7869	0.7188	0.7059	0.8509	1.3241	1.0322	0.7731	0.6762	3.0112	1.0942	0.0328	0.9267	0.8026	5.8564	1.8066	1.2709	0.9147	1.4457	2.2347	2.4481	0.3939	0.9139	4.8721	7.9666	10.0139	1.8138	0.9984
TCGA-CS-6668	1519	0	2	FEMALE	Oligodendroglioma	57	Left	G2	Mutant	codel	Methylated	Mutant	WT	YES	NA	Non-response	Non-response	1.7778	2.1081	2.1486	0.8122	0.7421	0.7304	0.8783	1.3666	1.0898	0.7979	0.7953	0.1879	1.1296	0.0396	0.9566	0.8284	6.0449	1.8647	1.3118	0.9442	1.4923	2.2781	2.5269	0.1109	0.4406	5.0291	8.1972	8.3217	1.8721	1.0305
TCGA-CS-6669	1494	0	1	FEMALE	Oligodendroglioma	26	Right	G2	WT	non-codel	Unmethylated	WT	WT	YES	NA	Non-response	Non-response	1.5427	2.2938	1.8093	0.684	0.6249	0.6154	0.7397	1.1509	0.9321	0.6719	0.6647	3.6554	0.9512	9.553	0.8055	0.6976	5.0903	1.5702	1.1047	0.7951	1.2566	1.957	2.1279	0.7052	0.1043	4.2343	6.933	8.8219	1.5765	0.8678
TCGA-CS-6670	1426	0	1	MALE	Oligodendroglioma	43	Right	G3	Mutant	codel	Methylated	NA	WT	YES	YES	NA	Non-response	1.2259	1.8227	1.4377	0.5435	0.4966	0.4888	0.5877	0.9145	0.7502	0.5339	0.5324	2.9047	0.7558	10.2252	0.6401	0.5543	4.0449	1.2478	0.8778	0.6318	0.9985	1.5576	1.6908	17.4794	0.902	3.3693	5.5181	7.1049	1.2527	0.6896
TCGA-DB-5270	3733	0	1	FEMALE	Oligoastrocytoma	38	Left	G3	Mutant	non-codel	Methylated	NA	Mutant	YES	YES	Response	Response	1.2562	1.8678	1.4733	0.5569	0.5089	0.5009	0.6022	0.9371	0.7686	0.5471	0.5455	2.9765	0.7745	10.4779	0.6559	0.568	4.1449	1.2786	0.8995	0.6474	1.0232	1.5765	1.7326	15.5087	0.8806	3.4504	5.6479	7.2819	1.2837	0.7066
TCGA-DB-5273	2493	0	1	MALE	Astrocytoma	33	Right	G3	Mutant	non-codel	Unmethylated	WT	Mutant	YES	YES	Response	Response	1.2524	1.8622	1.4689	0.5552	0.5073	0.4989	0.6004	0.9341	0.7664	0.5455	0.5437	2.9676	0.7722	10.4464	0.6539	0.5663	4.1324	1.2748	0.8968	0.6454	1.0201	1.5919	1.7274	17.865	0.9215	3.4035	5.6375	5.1276	1.2798	0.7045
TCGA-DB-5274	2289	0	1	FEMALE	Oligoastrocytoma	37	Left	G3	Mutant	codel	Methylated	Mutant	WT	YES	YES	Response	Response	1.2269	1.8243	1.439	0.544	0.497	0.4893	0.5883	0.9153	0.7497	0.5344	0.5328	2.9072	0.7565	10.234	0.6406	0.5548	4.0484	1.2488	0.8786	0.6323	0.9994	1.5562	1.6923	17.4762	0.9028	3.3675	5.519	7.0524	1.2538	0.6902
TCGA-DB-5275	1458	0	1	MALE	Oligoastrocytoma	36	Right	G3	Mutant	non-codel	Methylated	WT	Mutant	YES	YES	Response	NA	1.5112	2.247	1.7724	0.67	0.6122	0.6023	0.7245	1.1274	0.9226	0.6582	0.6557	3.5808	0.9318	12.144	0.7891	0.6834	4.9864	1.5382	1.0821	0.7788	1.231	1.8875	2.0844	1.0109	0.0471	4.0936	6.3325	8.1115	1.5443	0.8501
TCGA-DB-5276	2218	0	1	MALE	Oligoastrocytoma	32	Left	G3	Mutant	non-codel	Methylated	WT	Mutant	YES	YES	Response	Response	1.2431	1.8483	1.4579	0.5511	0.5036	0.4949	0.5958	0.9273	0.7594	0.5414	0.5398	2.9455	0.7664	10.3687	0.6491	0.5621	4.1017	1.2653	0.8901	0.6406	1.0125	1.5609	1.7146	17.6563	0.0462	3.1373	5.5264	7.1128	1.2703	0.6992
TCGA-DB-5277	1547	1	1	MALE	Astrocytoma	34	Left	G3	Mutant	non-codel	Methylated	WT	WT	YES	YES	Response	Non-response	1.2702	1.8887	1.4898	0.5632	0.5146	0.5061	0.6088	0.9476	0.7774	0.5533	0.5516	3.0098	0.7832	10.5952	0.6632	0.5744	4.1913	1.2929	0.9096	0.6546	1.0347	1.5781	1.752	17.1625	0.9152	3.4867	5.703	4.7676	1.2981	0.7145
TCGA-DB-5278	2772	0	1	MALE	Oligodendroglioma	17	Left	G2	Mutant	codel	Methylated	WT	WT	NA	YES	Non-response	Non-response	1.2267	1.824	1.4387	0.5439	0.4969	0.4889	0.5878	0.9151	0.7507	0.5343	0.5325	2.9067	0.7563	10.2321	0.6405	0.5547	4.0476	1.2486	0.8784	0.6322	0.9992	1.5484	1.692	17.4786	0.9025	3.3677	5.5046	7.0921	1.2536	0.69
TCGA-DB-5279	1354	0	1	MALE	Oligodendroglioma	59	Right	G2	Mutant	codel	Methylated	Mutant	WT	NA	YES	Response	Response	1.3156	1.9562	1.543	0.5833	0.533	0.5233	0.63	0.9815	0.8051	0.573	0.5713	3.1174	0.8112	10.974	0.6869	0.5949	4.3411	1.3391	0.9421	0.678	1.0717	1.4449	1.8147	18.4971	0.0277	2.7252	5.5354	3.0177	1.3445	0.7401
TCGA-DB-5280	1112	0	1	MALE	Oligoastrocytoma	43	Right	G2	Mutant	non-codel	Methylated	WT	Mutant	NA	NA	Response	Response	1.4631	2.1756	1.716	0.6487	0.5927	0.5831	0.7015	1.0915	0.8867	0.6373	0.6354	3.467	0.9021	12.0844	0.764	0.6616	4.8279	1.4893	1.0477	0.7541	1.1918	1.853	2.0181	1.7384	1.0407	3.9922	6.5807	8.4797	1.4952	0.823
TCGA-DB-5281	2381	0	1	MALE	Oligoastrocytoma	61	Left	G3	Mutant	non-codel	Methylated	WT	Mutant	YES	YES	Non-response	Non-response	1.2269	1.8242	1.4389	0.5439	0.497	0.4891	0.5879	0.9153	0.7508	0.5344	0.5328	2.9071	0.7565	10.2335	0.6406	0.5548	4.0482	1.2488	0.8785	0.6323	0.9993	1.5584	1.6922	17.4998	0.9027	3.3104	5.5205	7.0866	1.2537	0.6901
TCGA-DB-A4X9	1412	0	1	FEMALE	Oligoastrocytoma	33	Left	G2	Mutant	non-codel	Methylated	WT	WT	NA	NA	Response	Response	1.5271	2.2706	1.791	0.677	0.6186	0.6084	0.7315	1.1392	0.9324	0.6651	0.6628	3.6185	0.9416	12.7092	0.7974	0.6905	5.0389	1.5544	1.0935	0.787	1.2439	1.8853	2.1063	2.4625	0.0163	2.3923	4.6689	8.7993	1.5605	0.859
TCGA-DB-A4XA	573	0	1	MALE	Oligoastrocytoma	30	Left	G2	Mutant	codel	Methylated	Mutant	WT	NA	YES	Non-response	NA	1.4938	2.2212	1.752	0.6623	0.6051	0.5953	0.7161	1.1144	0.9129	0.6507	0.6487	3.5397	0.9211	12.4229	0.78	0.6755	4.9291	1.5205	1.0697	0.7699	1.2168	1.8992	2.0605	0.1843	0.4565	4.1046	6.6706	8.6567	1.5266	0.8403
TCGA-DB-A4XB	919	0	1	MALE	Astrocytoma	38	Left	G3	Mutant	non-codel	Methylated	WT	WT	YES	YES	Non-response	Response	1.4949	2.2228	1.7533	0.6628	0.6056	0.5959	0.7166	1.1153	0.9143	0.6511	0.6461	3.5423	0.9218	12.457	0.7806	0.676	4.9328	1.5217	1.0705	0.7705	1.2177	1.8325	2.062	1.2051	0.0107	3.7275	6.5591	8.5489	1.5277	0.8409
TCGA-DB-A4XC	1421	0	1	MALE	Oligoastrocytoma	26	Left	G2	Mutant	non-codel	Methylated	WT	Mutant	NA	YES	Response	Non-response	1.4161	2.1056	1.6608	0.6278	0.5736	0.5628	0.6773	1.0561	0.8665	0.6168	0.615	3.3554	0.8731	11.8117	0.7394	0.6403	4.6725	1.4414	1.014	0.7298	1.1535	1.7098	1.9532	16.4282	0.8218	2.2754	2.7112	2.0846	1.4471	0.7965
TCGA-DB-A4XD	1210	0	1	MALE	Astrocytoma	32	Right	G3	Mutant	non-codel	Methylated	WT	Mutant	YES	YES	Response	Response	1.641	2.44	1.9247	0.7275	0.6648	0.6516	0.7809	1.215	0.9929	0.7148	0.7124	3.8884	1.0118	13.6703	0.8568	0.7421	5.4148	1.6703	1.1751	0.8457	1.3367	1.5581	2.2635	3.0113	0.0248	2.712	3.9614	3.0366	1.677	0.9231
TCGA-DB-A4XE	1139	0	1	FEMALE	Oligoastrocytoma	27	Left	G3	Mutant	non-codel	Methylated	WT	Mutant	NA	YES	Response	Response	1.3309	1.9789	1.5609	0.5901	0.5391	0.5302	0.6378	0.9929	0.8085	0.5797	0.578	3.1536	0.8206	11.1001	0.6949	0.6018	4.3915	1.3547	0.953	0.6859	1.0841	1.6542	1.8357	10.844	0.9782	3.6527	5.9629	7.3585	1.36	0.7486
TCGA-DB-A4XF	1021	0	1	FEMALE	Astrocytoma	41	Right	G3	Mutant	non-codel	Methylated	WT	WT	YES	YES	Non-response	Response	1.5396	2.2892	1.8057	0.6826	0.6237	0.614	0.7375	1.1485	0.9386	0.6706	0.668	3.648	0.9493	12.6809	0.8039	0.6962	5.08	1.5671	1.1024	0.7935	1.2541	1.7035	2.1235	2.8414	0.0858	3.555	5.2198	6.303	1.5733	0.866
TCGA-DB-A4XG	2219	0	1	MALE	Oligodendroglioma	34	Right	G3	Mutant	codel	Methylated	Mutant	WT	YES	NA	Non-response	NA	1.3885	2.0646	1.6285	0.6156	0.5625	0.5538	0.6658	1.0359	0.8493	0.6048	0.603	3.2902	0.8561	11.5812	0.725	0.6279	4.5817	1.4133	0.9943	0.7156	1.131	1.7565	1.9152	7.4124	0.1902	3.8101	6.2476	8.0099	1.419	0.7811
TCGA-DB-A4XH	962	0	1	FEMALE	Oligoastrocytoma	53	Left	G2	Mutant	codel	Methylated	Mutant	WT	NA	NA	Non-response	Response	1.4892	2.2143	1.7466	0.6602	0.6033	0.5939	0.7122	1.111	0.9105	0.6486	0.6466	3.5287	0.9182	12.4192	0.7776	0.6734	4.9138	1.5158	1.0664	0.7675	1.213	1.7252	2.0541	4.1284	0.0177	3.7565	6.5396	6.0113	1.5218	0.8377
TCGA-DB-A64L	736	0	1	FEMALE	Oligodendroglioma	67	Right	G2	Mutant	codel	Methylated	Mutant	WT	NA	NA	Response	Non-response	1.5133	2.2502	1.7749	0.6709	0.613	0.6027	0.7248	1.129	0.9232	0.6591	0.6572	3.5859	0.9331	12.6027	0.7902	0.6843	4.9935	1.5404	1.0837	0.7799	1.2327	1.8877	2.0874	0.5429	0.0124	3.5913	6.1433	8.7719	1.5465	0.8513
TCGA-DB-A64O	775	1	1	MALE	Oligoastrocytoma	59	Left	G2	WT	non-codel	Unmethylated	Mutant	WT	YES	YES	Non-response	NA	1.548	2.3018	1.8156	0.6863	0.6271	0.6169	0.7422	1.1549	0.9458	0.6743	0.6718	3.6681	0.9545	12.9057	0.8083	0.7	5.108	1.5757	1.1085	0.7978	1.261	1.8089	2.1352	1.9481	0.0118	3.6893	6.8927	4.7656	1.582	0.8708
TCGA-DB-A64P	916	0	1	MALE	Oligodendroglioma	40	Left	G3	Mutant	codel	Methylated	Mutant	WT	YES	NA	Response	Response	1.5169	2.2555	1.7791	0.6725	0.6145	0.603	0.7273	1.1315	0.9273	0.6607	0.6583	3.5943	0.9353	12.651	0.792	0.6859	5.0052	1.544	1.0862	0.7818	1.2356	1.9189	2.0923	1.9737	0.4025	4.1554	6.6092	5.6695	1.5501	0.8533
TCGA-DB-A64Q	182	0	1	FEMALE	Oligoastrocytoma	31	Left	G2	Mutant	codel	Methylated	Mutant	WT	YES	NA	Non-response	NA	1.5078	2.2419	1.7684	0.6685	0.6108	0.6007	0.7221	1.1245	0.9203	0.6567	0.6547	3.5728	0.9297	12.5764	0.7873	0.6818	4.9752	1.5347	1.0797	0.7771	1.2282	1.8841	2.0797	3.3626	0.0239	1.1471	6.2493	8.5552	1.5408	0.8481
TCGA-DB-A64R	955	0	1	FEMALE	Oligodendroglioma	24	Right	G2	Mutant	codel	Methylated	Mutant	WT	NA	NA	Response	Response	1.6966	2.5227	1.9898	0.7522	0.6873	0.6758	0.8131	1.2657	1.0347	0.739	0.7359	4.0201	1.0461	14.0573	0.8859	0.7672	5.5982	1.7269	1.2149	0.8744	1.3816	1.7153	2.3304	5.4088	0.0172	0.7722	0.5405	3.4185	1.4346	0.9543
TCGA-DB-A64S	835	0	1	MALE	Oligoastrocytoma	20	NA	G2	Mutant	non-codel	Unmethylated	WT	Mutant	NA	NA	Response	Response	1.2805	1.9039	1.5018	0.5677	0.5187	0.5099	0.6135	0.9552	0.7831	0.5577	0.5561	3.0341	0.7895	10.6807	0.6686	0.579	4.2251	1.3033	0.9169	0.6599	1.043	1.6209	1.7662	14.8413	0.1775	3.5105	5.7426	7.1881	1.3085	0.7203
TCGA-DB-A64U	846	0	1	FEMALE	Oligoastrocytoma	38	Right	G2	Mutant	codel	Methylated	Mutant	WT	NA	NA	Response	NA	1.2739	1.8941	1.494	0.5648	0.516	0.5078	0.6101	0.9503	0.7795	0.5548	0.5516	3.0185	0.7854	10.6256	0.6651	0.576	4.2033	1.2966	0.9122	0.6565	1.0376	1.5942	1.7571	17.3184	0.0221	3.2726	5.6104	5.613	1.3018	0.7166
TCGA-DB-A64V	889	0	1	MALE	Oligodendroglioma	54	Left	G2	Mutant	codel	Methylated	Mutant	WT	YES	NA	Non-response	Response	1.3236	1.9681	1.5524	0.5868	0.5362	0.5279	0.6342	0.9875	0.8093	0.5765	0.5747	3.1364	0.8161	11.0407	0.6911	0.5985	4.3675	1.3473	0.9478	0.6822	1.0782	1.6301	1.8257	17.8663	0.06	3.623	1.7018	5.9486	1.3526	0.7446
TCGA-DB-A64W	438	1	1	FEMALE	Oligoastrocytoma	65	Right	G3	Mutant	codel	Methylated	Mutant	WT	YES	YES	Non-response	Non-response	1.4762	2.1949	1.7196	0.6545	0.598	0.5869	0.7066	1.1012	0.9034	0.643	0.6409	3.4979	0.9102	12.3132	0.7708	0.6675	4.8709	1.5026	1.0571	0.7608	1.2024	1.281	2.0271	21.0268	0.0158	0.6204	0.1619	0.3975	1.0113	0.8304
TCGA-DB-A64X	563	0	1	FEMALE	Astrocytoma	56	Right	G3	Mutant	non-codel	Methylated	WT	WT	YES	YES	Non-response	Response	1.6012	2.3809	1.878	0.7099	0.6487	0.6374	0.7672	1.1945	0.9795	0.6974	0.6952	3.7942	0.9873	13.3525	0.8361	0.7241	5.2835	1.6298	1.1466	0.8252	1.3043	1.4255	2.2084	7.9423	0.0163	1.3817	1.2242	4.3414	1.6312	0.9007
TCGA-DB-A75K	368	0	1	FEMALE	Oligoastrocytoma	55	Right	G3	Mutant	codel	Methylated	NA	WT	YES	YES	Response	Response	1.2501	1.8588	1.4662	0.5542	0.5064	0.4982	0.5989	0.9326	0.765	0.5445	0.5429	2.9621	0.7708	10.4274	0.6527	0.5653	4.1249	1.2724	0.8952	0.6443	1.0183	1.4949	1.7243	17.7665	0.0296	3.1113	5.4464	6.818	1.2775	0.7032
TCGA-DB-A75L	342	0	1	FEMALE	Astrocytoma	36	Left	G3	Mutant	non-codel	Methylated	NA	WT	YES	YES	Response	Response	1.4592	2.1697	1.7113	0.6469	0.5911	0.5807	0.6987	1.0885	0.893	0.6356	0.6337	3.4576	0.8997	12.1713	0.7619	0.6598	4.8148	1.4852	1.0449	0.752	1.1886	1.2057	2.0114	20.169	0.0145	0.8467	0.1653	1.3744	1.4766	0.8208
TCGA-DB-A75M	544	0	1	MALE	Astrocytoma	47	Right	G2	Mutant	non-codel	Methylated	NA	Mutant	YES	YES	Response	Response	1.907	2.8355	2.2274	0.8455	0.7725	0.7569	0.9097	0.7234	1.1627	0.8306	0.8261	4.5186	1.1758	15.8808	0.9957	0.8623	6.2923	1.8872	1.3655	0.9828	1.1631	1.4082	2.4206	0.7202	0.0292	0.027	0.0631	0.9802	0.5676	1.0727
TCGA-DB-A75O	935	0	1	MALE	Astrocytoma	29	Left	G3	Mutant	non-codel	Methylated	NA	WT	NA	NA	Response	NA	1.5047	2.2373	1.7648	0.6671	0.6095	0.5986	0.7212	1.1225	0.9197	0.6554	0.6534	3.5654	0.9278	12.4995	0.7857	0.6804	4.965	1.5316	1.0775	0.7755	1.2257	1.8558	2.0755	1.2769	0.008	4.1173	6.7346	7.4243	1.5377	0.8464
TCGA-DB-A75P	492	0	1	FEMALE	Astrocytoma	25	Right	G2	WT	non-codel	Unmethylated	NA	WT	NA	NA	Response	Response	1.2508	1.8599	1.467	0.5546	0.5067	0.4971	0.5984	0.9328	0.7654	0.5448	0.5431	2.9639	0.7712	10.4334	0.6531	0.5656	4.1273	1.2731	0.8957	0.6446	1.0189	1.5323	1.7253	17.8354	0.0309	3.0152	5.4162	6.8022	1.2782	0.7036
TCGA-DH-5140	607	1	1	FEMALE	Oligoastrocytoma	38	Left	G3	WT	non-codel	Unmethylated	WT	WT	YES	YES	Non-response	Non-response	1.2619	1.8764	1.48	0.5595	0.5112	0.5026	0.6048	0.9413	0.7722	0.5496	0.548	2.9902	0.7781	10.526	0.6589	0.5706	4.1639	1.2845	0.9036	0.6504	1.0279	1.5311	1.7406	17.9575	0.441	3.4057	5.628	5.1098	1.2896	0.7098
TCGA-DH-5141	968	0	1	MALE	Oligodendroglioma	32	Left	G3	Mutant	codel	Methylated	Mutant	WT	YES	YES	Non-response	NA	1.7073	2.5386	2.0022	0.7569	0.6916	0.6791	0.816	1.2736	1.0441	0.7436	0.7414	4.0455	1.0527	14.2401	0.8915	0.772	5.6335	1.7367	1.2226	0.8799	1.3907	1.5664	2.3472	6.0866	0.0512	1.1162	0.1772	1.8771	1.6683	0.9604
TCGA-DH-5142	1943	0	1	MALE	Astrocytoma	29	Left	G3	Mutant	non-codel	Methylated	WT	Mutant	YES	YES	Non-response	Non-response	1.4901	2.2156	1.7477	0.6606	0.6036	0.5931	0.7131	1.1116	0.9109	0.649	0.6224	3.5308	0.9188	12.4249	0.778	0.6738	4.9168	1.5167	1.067	0.768	1.2138	1.6951	2.0553	5.3266	1.067	4.0672	5.8316	4.1765	1.5227	0.8382
TCGA-DH-5143	1401	0	1	MALE	Oligoastrocytoma	30	Left	G3	Mutant	non-codel	Methylated	WT	WT	YES	YES	Non-response	Non-response	1.3425	1.9962	1.5745	0.5952	0.5438	0.5336	0.6421	1.0015	0.8215	0.5847	0.5824	3.1811	0.8278	11.1981	0.701	0.6071	4.4298	1.3661	0.9613	0.6919	1.0935	1.4183	1.8517	18.8481	0.0681	3.5596	4.0873	1.937	1.3719	0.7552
TCGA-DH-5144	748	0	1	FEMALE	Oligodendroglioma	56	Right	G3	Mutant	codel	Methylated	Mutant	Mutant	NA	YES	Response	Non-response	1.3453	2.0004	1.5779	0.5964	0.545	0.5354	0.6446	1.0036	0.8228	0.586	0.5842	3.1878	0.8295	11.2209	0.7025	0.6083	4.4391	1.3692	0.9634	0.6933	1.0958	1.6947	1.8556	13.0863	0.0496	3.6966	3.4306	7.7382	1.3748	0.7568
TCGA-DH-A669	919	1	1	MALE	Oligodendroglioma	70	Left	G3	Mutant	codel	Methylated	Mutant	WT	NA	NA	NA	NA	1.2266	1.8238	1.4386	0.5438	0.4969	0.4888	0.5881	0.9151	0.7507	0.5343	0.5327	2.9065	0.7563	10.2314	0.6405	0.5547	4.0474	1.2485	0.8783	0.6322	0.9991	1.5597	1.6919	17.4415	0.9026	3.3714	5.5032	7.1106	1.2535	0.69
TCGA-DH-A66B	1279	0	1	MALE	Astrocytoma	52	Left	G3	Mutant	non-codel	Methylated	WT	WT	YES	YES	Non-response	Non-response	1.2333	1.8338	1.4465	0.5468	0.4996	0.4915	0.5913	0.9201	0.7529	0.5372	0.5349	2.9224	0.7604	10.2852	0.644	0.5577	4.0695	1.2554	0.8832	0.6356	1.0046	1.555	1.7011	17.1411	0.8013	3.3898	5.5481	7.1102	1.2603	0.6937
TCGA-DH-A66D	846	0	1	FEMALE	Astrocytoma	43	Right	G3	Mutant	non-codel	Methylated	NA	Mutant	YES	YES	Non-response	Non-response	1.4275	2.1226	1.6743	0.6329	0.5783	0.5693	0.6834	1.065	0.8732	0.6218	0.6198	3.3826	0.8802	11.9056	0.7454	0.6455	4.7103	1.453	1.0222	0.7357	1.1628	1.7998	1.969	4.7007	0.8856	3.9234	6.3858	7.7062	1.4588	0.803
TCGA-DH-A66F	523	0	1	MALE	Oligodendroglioma	49	Left	G2	Mutant	codel	Methylated	Mutant	WT	NA	NA	Response	Response	1.3231	1.9673	1.5518	0.5866	0.536	0.5266	0.6334	0.987	0.8092	0.5763	0.5746	3.1351	0.8158	11.0347	0.6908	0.5983	4.3657	1.3467	0.9474	0.6819	1.0777	1.6684	1.825	11.6857	0.3093	3.6228	5.9221	7.6653	1.3521	0.7442
TCGA-DH-A66G	523	0	1	FEMALE	Oligodendroglioma	49	Left	G3	Mutant	non-codel	Methylated	NA	Mutant	YES	YES	Non-response	Response	1.2281	1.8261	1.4404	0.5445	0.4975	0.4885	0.5884	0.9162	0.7513	0.5349	0.5333	2.91	0.7572	10.2439	0.6412	0.5553	4.0523	1.25	0.8794	0.6329	1.0004	1.5574	1.6939	17.4625	0.9022	3.3481	5.5189	7.0402	1.255	0.6908
TCGA-DH-A7UR	1650	0	1	FEMALE	Oligodendroglioma	59	Right	G3	Mutant	codel	Methylated	NA	WT	YES	YES	Response	NA	1.2392	1.8425	1.4534	0.5494	0.502	0.4937	0.5941	0.9244	0.7583	0.5397	0.538	2.9363	0.764	10.3362	0.647	0.5604	4.0888	1.2613	0.8873	0.6386	1.0094	1.5714	1.7092	17.3637	0.1638	3.4057	5.552	7.1784	1.2663	0.697
TCGA-DH-A7US	706	0	1	MALE	Oligodendroglioma	50	Right	G2	Mutant	codel	Methylated	NA	WT	NA	NA	Non-response	Non-response	1.2268	1.8242	1.4389	0.5439	0.497	0.4878	0.5854	0.9152	0.7508	0.5344	0.5325	2.9071	0.7564	10.2334	0.6406	0.5548	4.0482	1.2488	0.8785	0.6323	0.9993	1.5578	1.6922	17.4985	0.9026	3.3665	5.5183	7.0592	1.2537	0.6901
TCGA-DH-A7UT	531	1	1	MALE	Astrocytoma	30	Left	G3	Mutant	non-codel	Methylated	NA	WT	YES	YES	Non-response	Non-response	1.2374	1.8399	1.4513	0.5486	0.5013	0.4929	0.5928	0.923	0.757	0.539	0.5373	2.932	0.7629	10.3213	0.6461	0.5595	4.0829	1.2595	0.8861	0.6377	1.0079	1.5674	1.7067	17.532	0.7637	3.3241	5.5432	6.6113	1.2645	0.696
TCGA-DH-A7UU	417	0	1	MALE	Astrocytoma	43	Right	G3	Mutant	non-codel	Methylated	NA	WT	YES	YES	Non-response	Non-response	1.2634	1.8786	1.4818	0.5601	0.5118	0.5027	0.605	0.9425	0.7731	0.5503	0.5479	2.9937	0.779	10.5384	0.6597	0.5713	4.1688	1.286	0.9047	0.6511	1.0291	1.5941	1.7427	15.9899	0.0175	3.4358	5.6387	7.3015	1.2911	0.7107
TCGA-DH-A7UV	566	0	1	MALE	Astrocytoma	49	Right	G3	Mutant	non-codel	Methylated	NA	Mutant	YES	YES	Non-response	Non-response	1.3454	2.0006	1.578	0.5965	0.545	0.5357	0.6441	1.0036	0.823	0.586	0.5832	3.1881	0.8296	11.2215	0.7025	0.6084	4.4395	1.3695	0.9635	0.6934	1.0959	1.6903	1.8558	11.5518	0.2333	3.5184	6.0108	6.689	1.3749	0.7568
TCGA-DU-5847	548	0	2	FEMALE	Astrocytoma	34	Right	G3	WT	non-codel	Methylated	Mutant	WT	YES	YES	Non-response	NA	0.155	0.0163	1.128	1.2971	1.1847	1.1625	1.377	2.1823	1.7256	1.274	0.2827	0.0017	0.0268	0.0112	1.5273	1.3215	9.6536	2.9779	1.5049	1.5078	0.4164	0.8857	0.0483	0.0509	0.0174	0.0405	0.066	0.2103	0.0007	1.6031
TCGA-DU-5849	443	0	2	MALE	Oligodendroglioma	48	Left	G2	Mutant	codel	Methylated	Mutant	WT	YES	NA	Non-response	NA	2.1578	3.1797	2.5224	0.9574	0.8748	0.8591	1.0317	1.6108	1.2885	0.9406	0.9308	4.4333	1.3315	0.237	1.1276	0.9765	7.1257	2.1981	1.5464	1.113	1.7587	2.0247	2.9773	0.2453	0.039	1.2421	1.5935	0.6251	2.2054	1.2147
TCGA-DU-5851	531	0	2	FEMALE	Oligoastrocytoma	40	Right	G3	Mutant	non-codel	Unmethylated	WT	Mutant	YES	YES	Non-response	NA	0.0045	0.0119	3.1528	1.1918	1.0889	1.0654	1.2658	1.8879	1.5943	1.1709	1.1241	0.0003	0.0029	0.0054	1.4004	1.2156	8.8702	2.7037	1.9235	1.3854	1.4875	2.4948	0.4036	0.0363	0.0239	0.0326	0.0543	3.2608	0.01	0.0393
TCGA-DU-5852	205	1	2	FEMALE	Oligoastrocytoma	61	Left	G3	WT	non-codel	Methylated	Mutant	Mutant	YES	YES	Non-response	Non-response	0.022	0.0329	2.8143	1.0639	0.9721	0.9531	1.1448	1.79	1.4355	1.0452	1.0421	0.0013	0.42	0.0091	1.2529	1.0851	7.9178	2.4425	1.7183	1.2367	0.8583	2.7706	3.2971	0.1807	0.0099	0.0417	0.5228	7.5185	0.0032	1.3281
TCGA-DU-5853	407	0	2	MALE	Oligoastrocytoma	29	Left	G2	Mutant	non-codel	Methylated	WT	Mutant	YES	YES	Non-response	NA	0.1699	0.0591	0.3201	1.228	1.1218	1.1044	1.3238	2.0639	1.6421	1.1989	1.2021	0.0023	1.3407	0.0216	1.4462	1.2525	9.1392	2.8171	1.9805	1.4274	2.2378	0.5561	0.8953	0.0977	0.1675	0.2807	0.0637	0.1407	0.147	1.5575
TCGA-DU-5854	257	0	2	FEMALE	Astrocytoma	57	Right	G3	WT	non-codel	Unmethylated	Mutant	WT	YES	YES	Non-response	NA	0.0944	0.007	2.8627	1.0821	0.9888	0.9701	1.1599	1.7676	1.4525	1.0631	1.0598	0.003	0.0276	0.0114	1.2744	1.1037	8.0537	2.4841	1.7478	1.2579	1.9879	2.7963	3.3658	0.0067	0.0115	0.9278	0.9233	4.211	0.0337	1.371
TCGA-DU-5855	207	0	2	FEMALE	Oligoastrocytoma	49	Right	G3	Mutant	non-codel	Methylated	WT	Mutant	YES	YES	Non-response	NA	0.0764	0.0109	3.0936	1.1706	1.0696	1.0449	1.2399	1.9696	1.5627	1.15	1.1365	0.0016	0.08	0.0067	1.3786	1.1939	8.712	2.6875	1.8904	1.3607	1.967	1.7241	2.2844	0.1385	0.0086	0.0762	0.0576	0.9382	0.0139	1.3773
TCGA-DU-5870	5546	0	1	FEMALE	Oligodendroglioma	34	Right	G2	Mutant	codel	Methylated	Mutant	WT	YES	YES	Non-response	Non-response	1.2272	1.8247	1.4393	0.5441	0.4971	0.4888	0.5872	0.9148	0.751	0.5345	0.5315	2.9079	0.7567	10.2363	0.6408	0.5549	4.0468	1.249	0.8788	0.6325	0.9996	1.5585	1.6927	17.5053	0.903	3.3713	5.5242	7.114	1.2541	0.6903
TCGA-DU-5871	576	0	2	FEMALE	Oligoastrocytoma	37	Left	G2	Mutant	non-codel	Methylated	WT	Mutant	YES	YES	Non-response	NA	0.0109	0.0081	2.3749	0.8977	0.8203	0.8039	0.9699	1.5104	1.2082	0.882	0.8782	0.0495	0.0159	0.0053	1.0573	0.9157	6.6815	2.0611	1.45	1.0436	1.6494	2.5272	2.793	0.076	0.0382	0.8701	8.6092	10.8636	2.0688	0.3194
TCGA-DU-5872	532	0	2	FEMALE	Oligoastrocytoma	43	Left	G2	Mutant	non-codel	Methylated	WT	Mutant	YES	YES	Non-response	Non-response	0.0279	0.0226	2.0126	1.1717	1.0706	1.0507	1.2627	1.9708	1.5638	1.1511	1.0991	0.0029	0.0231	0.0072	1.3799	1.195	8.7201	2.69	1.8924	1.362	2.1448	1.0495	3.6364	0.1245	0.0095	0.5242	0.3559	0.3074	0.6078	0.8801
TCGA-DU-5874	461	0	2	FEMALE	Oligodendroglioma	62	Left	G2	Mutant	codel	Methylated	Mutant	WT	YES	NA	Non-response	NA	0.0191	0.0057	3.0458	1.1519	1.0525	1.0317	1.2386	1.938	1.5517	1.1316	1.1269	0.0023	0.0033	0.0056	1.3566	1.1749	8.5729	2.6445	1.8605	1.339	2.1144	2.2276	3.3593	0.0417	0.0246	0.2997	0.1164	1.4098	0.2908	0.2992
TCGA-DU-6392	6423	0	1	FEMALE	Astrocytoma	35	Right	G3	WT	non-codel	Unmethylated	NA	Mutant	YES	YES	Non-response	Non-response	1.8876	2.8066	1.6495	0.8369	0.7646	0.7517	0.9046	1.3249	1.1522	0.8221	0.8195	4.4727	1.1638	15.7132	0.9856	0.8536	6.2283	1.9129	1.3517	0.9728	1.5375	1.0971	2.5981	0.433	0.0092	1.0292	0.1096	0.2817	1.2137	1.0618
TCGA-DU-6393	1585	1	2	MALE	Oligodendroglioma	66	Left	G3	Mutant	codel	Methylated	Mutant	WT	YES	YES	NA	NA	0.0472	0.0172	2.7203	1.0283	0.9396	0.9221	1.1107	1.7302	1.3721	1.0102	1.0072	0.0055	0.1974	0.0124	1.2111	1.0488	7.6531	2.3608	1.6609	1.1954	1.8893	2.5686	3.1992	0.0646	0.0229	2.1732	2.7563	3.1096	2.3702	1.25
TCGA-DU-6394	682	1	2	MALE	Oligodendroglioma	53	Midline	G3	Mutant	codel	Methylated	Mutant	WT	YES	YES	Non-response	Non-response	0.0492	0.014	2.4949	0.9459	0.8643	0.8474	1.0198	1.5917	1.262	0.9293	0.9259	0.0923	0.017	0.0065	1.1141	0.9648	7.0402	2.1717	1.5278	1.0996	1.738	2.4777	2.9429	0.0758	0.0171	5.3301	9.5451	0.8544	2.1804	0.7971
TCGA-DU-6395	1491	1	2	MALE	Oligoastrocytoma	31	Left	G2	Mutant	non-codel	Methylated	NA	Mutant	YES	YES	Non-response	Non-response	1.1407	1.6296	2.9504	1.1153	1.0191	0.998	1.1899	1.8764	1.4966	1.0957	1.0916	0.0337	1.551	0.0404	1.3135	1.1376	8.3007	2.5606	1.7812	1.2965	1.6596	1.8866	0.2183	0.0184	0.0195	0.1177	0.0208	3.4657	0.0006	1.4151
TCGA-DU-6396	2286	1	2	FEMALE	Oligoastrocytoma	31	Right	G3	Mutant	non-codel	Methylated	WT	Mutant	YES	YES	Non-response	Non-response	0.0133	0.0092	3.1261	1.2482	1.1405	1.1112	1.3274	2.0993	1.6806	1.2263	1.2227	0.0003	0.0019	0.0057	1.4701	1.273	9.29	2.8658	1.6264	1.451	1.0512	1.4702	0.0607	0.0098	0.0584	0.0446	0.0226	0.4632	0.0005	0.1296
TCGA-DU-6397	1401	1	2	MALE	Oligodendroglioma	45	Right	G3	Mutant	codel	Methylated	Mutant	WT	YES	YES	Non-response	Non-response	0.0083	0.0057	2.3172	0.8759	0.8003	0.7843	0.9386	1.3987	1.165	0.8605	0.8455	2.1248	0.0163	0.0057	1.0316	0.8934	6.5191	2.01	1.4148	1.0182	1.5634	2.4938	2.7251	0.2064	0.0107	0.7438	7.8993	11.3889	1.4678	1.1113
TCGA-DU-6399	2000	1	2	MALE	Oligodendroglioma	54	Right	G2	Mutant	non-codel	Methylated	WT	Mutant	NA	YES	Non-response	Non-response	0.0074	0.0139	0.325	1.3111	1.1979	1.1616	1.4024	2.2043	1.752	1.2775	1.2842	0.0004	0.0128	0.0066	1.5441	1.2339	9.7576	2.6695	0.187	1.524	2.393	0.8327	0.0059	0.008	0.0357	0.4806	0.0088	0.0974	0.0001	0.1165
TCGA-DU-6400	37	1	2	FEMALE	Oligodendroglioma	66	Left	G2	Mutant	codel	Methylated	Mutant	WT	NA	NA	NA	NA	0.2535	0.0609	2.571	0.9719	0.888	0.874	1.0346	1.6347	1.2972	0.9548	0.9489	0.0042	0.5961	0.0071	1.1446	0.9913	7.2333	2.2313	1.5697	1.1298	1.7856	2.6795	3.0236	0.0187	0.0115	2.5171	3.5996	6.1972	2.2402	1.226
TCGA-DU-6401	2660	1	2	FEMALE	Oligodendroglioma	31	Left	G2	Mutant	non-codel	Methylated	WT	Mutant	YES	YES	Non-response	Non-response	0.0315	0.0149	2.9721	1.1647	1.0642	1.0419	1.2406	1.9594	1.5582	1.1442	1.1403	0.0008	0.0317	0.0075	1.3717	1.1879	8.6681	2.6735	1.8811	1.3539	2.1204	1.2276	3.5874	0.0264	0.0114	0.1131	0.2469	0.7597	0.1872	0.9482
TCGA-DU-6402	214	1	2	MALE	Astrocytoma	52	Right	G3	WT	non-codel	Unmethylated	Mutant	WT	YES	YES	Non-response	Non-response	0.0115	0.0073	2.7505	1.0397	0.95	0.9349	1.1227	1.7372	1.4089	1.0214	1.0182	0.0037	0.0055	0.0055	1.2245	1.0605	7.7382	2.387	1.6793	1.2086	1.9099	2.7499	3.2342	0.0392	0.0165	0.5852	0.4662	7.2257	2.321	0.2542
TCGA-DU-6403	354	1	2	FEMALE	Oligoastrocytoma	60	Right	G3	WT	non-codel	Unmethylated	Mutant	WT	YES	YES	NA	NA	0.0885	0.0153	2.3453	0.8866	0.8101	0.7933	0.9519	1.4917	1.1947	0.871	0.8684	0.1122	0.0573	0.0077	1.0441	0.9043	6.5983	2.0354	1.4319	1.0306	1.6289	2.511	2.7582	0.0247	0.0213	3.8486	8.95	7.7071	2.0435	1.0746
TCGA-DU-6404	4068	1	2	FEMALE	Oligodendroglioma	24	Right	G3	WT	non-codel	Unmethylated	WT	WT	YES	YES	Non-response	Non-response	0.2453	0.3569	2.194	0.8294	0.7578	0.7457	0.8969	1.3956	1.1181	0.8148	0.8124	1.34	1.1417	0.0128	0.9768	0.8459	6.1726	1.9041	1.3396	0.9641	1.5238	2.3697	2.5803	0.2337	0.06	5.1215	8.4033	8.829	1.9117	1.0522
TCGA-DU-6405	605	1	2	FEMALE	Astrocytoma	51	Right	G3	WT	non-codel	Methylated	Mutant	WT	YES	YES	Non-response	Non-response	0.0342	0.0257	2.9632	1.1204	1.0237	1.0042	1.1939	1.8841	1.5068	1.1007	1.0975	0.0008	0.2407	0.0073	1.3195	1.1428	8.3386	2.5721	1.8096	1.3024	2.0387	1.8465	3.4468	0.1615	0.017	0.2152	0.2147	2.1521	0.8658	1.3431
TCGA-DU-6406	512	1	2	FEMALE	Oligoastrocytoma	59	Left	G3	WT	non-codel	Unmethylated	NA	WT	YES	YES	NA	NA	0.1259	0.0486	2.6452	0.9999	0.9136	0.8951	1.0645	1.6823	1.3372	0.9823	0.979	0.0096	0.8606	0.0098	1.1776	1.0199	7.4419	2.2957	1.615	1.1624	1.833	2.4621	2.3358	0.2803	0.0169	0.3637	0.1057	12.2414	0.0071	1.2677
TCGA-DU-6407	2875	1	2	FEMALE	Oligodendroglioma	35	Right	G2	Mutant	non-codel	Methylated	WT	Mutant	YES	YES	Non-response	Non-response	0.1347	0.0167	1.8414	1.176	1.0745	1.0549	1.2565	1.7698	1.5828	1.1553	1.1516	0.0013	0.219	0.0108	1.385	1.1994	8.7475	2.674	1.8994	1.367	2.154	1.5216	3.4591	0.0148	0.0158	0.1442	0.1531	0.2499	0.1632	1.4553
TCGA-DU-6408	3470	1	2	FEMALE	Oligodendroglioma	23	Right	G3	Mutant	non-codel	Methylated	WT	Mutant	YES	YES	Non-response	Non-response	0.1032	0.0732	2.853	1.0785	0.9854	0.9706	1.1629	1.8135	1.4481	1.0595	1.0563	0.0032	1.0832	0.0113	1.2701	1.1	8.0266	2.4752	1.7419	1.2537	1.9815	2.5882	3.3546	0.0158	0.0139	1.408	1.0941	2.6628	0.0542	1.3677
TCGA-DU-6410	242	0	2	MALE	Oligodendroglioma	56	Midline	G3	Mutant	codel	Methylated	Mutant	WT	YES	NA	NA	NA	0.0112	0.0044	2.4852	0.9394	0.8583	0.8423	1.0143	1.5795	1.2528	0.9229	0.9197	0.038	0.0015	0.0051	1.1064	0.9582	6.9917	2.1567	1.5173	1.092	1.726	2.2777	2.9227	0.1962	0.0143	5.5305	9.4445	2.4123	2.1653	0.0358
TCGA-DU-6542	73	0	2	MALE	Oligoastrocytoma	25	Right	G3	Mutant	non-codel	Methylated	WT	WT	YES	YES	Non-response	NA	0.5532	0.0509	2.8427	1.0818	0.9884	0.9724	1.1686	1.8203	1.4513	1.0627	1.0422	0.0068	1.1383	0.0117	1.274	1.1033	8.051	2.4836	1.7472	1.2575	1.9875	1.4378	3.3019	0.8172	0.0121	1.4222	0.6355	0.6594	2.1278	1.3723
TCGA-DU-7006	349	1	1	FEMALE	Astrocytoma	60	Left	G3	WT	non-codel	Methylated	Mutant	WT	YES	YES	Non-response	NA	1.918	2.8519	2.2491	0.8504	0.777	0.7632	0.9153	1.4297	1.1658	0.8354	0.829	4.5449	1.1826	13.5729	1.0015	0.8673	6.3289	1.9523	1.3735	0.9885	1.561	1.7234	2.6108	0.1935	0.0098	0.2485	0.1204	1.1254	0.9132	1.0789
TCGA-DU-7007	1915	1	1	MALE	Astrocytoma	33	Right	G2	Mutant	non-codel	Methylated	WT	Mutant	NA	NA	NA	NA	1.226	1.8229	1.4379	0.5435	0.4966	0.4883	0.5875	0.9144	0.7502	0.534	0.5324	2.9051	0.7559	10.2264	0.6401	0.5544	4.0454	1.2476	0.8779	0.6319	0.9986	1.5568	1.691	17.4883	0.902	3.3667	5.5177	7.1068	1.2529	0.6896
TCGA-DU-7008	4752	0	1	FEMALE	Oligodendroglioma	41	Right	G2	Mutant	non-codel	Methylated	WT	Mutant	YES	YES	Non-response	Non-response	1.7972	2.6723	2.1079	0.7968	0.728	0.7134	0.8571	1.3406	1.0743	0.7828	0.7793	4.2586	1.1081	14.3004	0.9384	0.8127	5.9302	1.8293	1.287	0.9262	1.4639	2.1462	2.4782	0.4937	0.0199	1.8744	0.5736	2.7093	0.9025	1.011
TCGA-DU-7009	4695	1	1	FEMALE	Oligodendroglioma	32	Left	G2	Mutant	codel	Methylated	Mutant	WT	YES	YES	Non-response	Non-response	2.0696	3.0773	2.4199	0.9176	0.8384	0.824	0.9881	1.5423	1.2507	0.9014	0.8978	4.9034	1.2761	7.8274	1.0806	0.9359	6.829	2.1066	1.482	1.0666	1.6839	1.5457	2.583	0.1218	0.0143	0.3265	0.0755	0.6602	1.006	1.1642
TCGA-DU-7010	456	1	2	FEMALE	Astrocytoma	58	Left	G3	Mutant	non-codel	Methylated	WT	WT	YES	YES	Non-response	Non-response	2.1015	3.1247	2.4642	0.9317	0.8513	0.8344	1.0075	1.5671	1.2512	0.9153	0.9118	4.9771	1.2957	3.9109	1.0973	0.9503	6.9341	2.1377	1.5048	1.0831	1.7118	1.5274	2.7577	0.0861	0.0083	2.2123	0.0927	1.0626	1.2797	1.1821
TCGA-DU-7011	3200	1	1	MALE	Oligoastrocytoma	25	Right	G2	Mutant	non-codel	Unmethylated	NA	Mutant	NA	YES	Non-response	NA	1.8113	2.6932	2.1243	0.803	0.7338	0.7202	0.8656	1.3513	1.1079	0.7889	0.7864	4.292	1.1168	15.0114	0.9458	0.8191	5.9767	1.8437	1.297	0.9335	1.4754	1.6049	2.4982	0.8062	0.0055	0.8351	0.4124	2.0032	1.7831	1.0189
TCGA-DU-7012	199	1	1	FEMALE	Astrocytoma	74	Left	G3	WT	non-codel	Methylated	Mutant	WT	NA	YES	Non-response	Non-response	1.8123	2.6946	2.1255	0.8035	0.7341	0.7198	0.851	1.3519	1.1086	0.7893	0.7866	4.2942	1.1174	14.8744	0.9463	0.8195	5.9798	1.8446	1.2977	0.934	1.4554	1.3631	2.4026	3.2599	0.0196	0.1193	0.0846	2.8269	0.01	1.0194
TCGA-DU-7013	269	1	1	MALE	Astrocytoma	59	Left	G3	WT	non-codel	Unmethylated	Mutant	WT	YES	YES	Non-response	Non-response	1.9256	2.8632	2.2521	0.8537	0.78	0.7663	0.9187	1.4291	1.1682	0.8387	0.8361	4.5628	1.1873	14.7827	1.0054	0.8708	6.3532	1.9594	1.3788	0.9924	1.5683	1.503	1.6606	0.6288	0.007	0.5866	0.0428	0.9091	0.0243	1.0832
TCGA-DU-7014	3571	1	1	MALE	Oligodendroglioma	59	Right	G2	NA	non-codel	Methylated	NA	NA	NA	YES	Non-response	Non-response	1.8549	2.7581	2.1756	0.8224	0.7514	0.7378	0.8866	1.3838	1.1318	0.8079	0.8054	4.3954	1.1437	12.0131	0.9685	0.8388	6.1141	1.888	1.3283	0.956	1.511	1.3815	2.5582	0.2981	0.009	1.0665	0.2831	3.6077	1.8694	1.0434
TCGA-DU-7015	2761	0	1	FEMALE	Oligodendroglioma	41	Right	G2	Mutant	non-codel	Methylated	WT	Mutant	YES	YES	Non-response	Non-response	1.9406	2.8856	2.2552	0.8604	0.7861	0.773	0.9098	1.4472	1.1849	0.8453	0.8427	4.5984	1.1966	16.089	1.0133	0.8776	6.4034	1.9753	1.3895	1.0002	1.3451	1.2145	1.4943	0.4767	0.0068	0.0648	0.0484	0.5053	0.006	1.0916
TCGA-DU-7018	933	1	2	FEMALE	Oligodendroglioma	57	Right	G3	Mutant	codel	Methylated	Mutant	WT	YES	NA	Non-response	Non-response	1.726	2.5664	2.0244	0.7652	0.6992	0.6858	0.8276	1.2876	1.0337	0.7518	0.7496	4.0885	1.0642	3.2663	0.9012	0.7805	5.6953	1.7562	1.236	0.8896	1.4059	2.1268	2.3807	0.0094	0.0062	4.7243	6.1336	9.3511	0.4051	0.9709
TCGA-DU-7019	800	0	1	MALE	Oligoastrocytoma	39	Right	NA	Mutant	non-codel	Methylated	WT	WT	YES	YES	Non-response	NA	1.8606	2.7665	2.182	0.8249	0.7534	0.7378	0.8808	1.3864	1.1073	0.8104	0.6859	4.4087	1.1472	14.7485	0.9715	0.8414	6.1393	1.8938	1.3323	0.9589	1.4914	1.893	2.5662	0.2174	0.0211	0.104	0.9669	0.9514	1.7214	1.0466
TCGA-DU-7290	315	1	1	FEMALE	Astrocytoma	45	Right	G3	WT	non-codel	Unmethylated	Mutant	WT	NA	NA	NA	NA	1.4985	2.2282	1.7576	0.6644	0.6071	0.5967	0.7185	1.1179	0.9139	0.6527	0.6508	3.5508	0.924	12.163	0.7825	0.6776	4.9438	1.5251	1.0731	0.7723	1.2206	1.8588	2.067	1.8238	0.0074	4.1147	6.1293	8.1349	1.5314	0.8429
TCGA-DU-7292	242	1	1	MALE	Astrocytoma	69	Left	G3	WT	non-codel	Methylated	WT	WT	YES	YES	Non-response	Non-response	1.8205	2.7069	2.1352	0.8071	0.7375	0.7263	0.8707	1.358	1.1058	0.7929	0.7901	4.3137	1.1225	15.1355	0.9506	0.8232	6.007	1.853	1.3036	0.9382	1.4809	1.6529	2.4906	1.3333	0.0162	0.6364	0.2817	2.3012	0.6266	1.024
TCGA-DU-7294	2869	0	1	FEMALE	Oligodendroglioma	53	Right	G2	Mutant	codel	Methylated	Mutant	WT	NA	NA	Non-response	Non-response	1.5856	2.3577	1.8597	0.703	0.6423	0.6294	0.7474	1.1829	0.9689	0.6906	0.6885	3.7572	0.9777	12.848	0.8279	0.717	5.232	1.614	1.1354	0.8172	1.2916	2.0161	2.1597	1.9467	0.9369	4.3582	0.824	9.1807	0.0296	0.8919
TCGA-DU-7298	576	1	1	FEMALE	Astrocytoma	38	Left	G3	Mutant	non-codel	Methylated	WT	Mutant	YES	YES	Non-response	NA	1.8132	2.696	2.1265	0.8039	0.7345	0.7228	0.8636	1.3521	1.0982	0.7897	0.7874	4.2963	1.1179	15.0745	0.9467	0.8199	5.9828	1.8455	1.2984	0.9345	1.4762	1.8276	2.4999	1.4327	0.0187	0.2744	0.204	1.8733	1.5884	1.0199
TCGA-DU-7299	1339	1	1	MALE	Astrocytoma	33	Left	G3	Mutant	non-codel	Methylated	WT	WT	YES	YES	Non-response	Non-response	1.8119	2.6941	2.125	0.8033	0.734	0.7198	0.8596	1.3516	1.1051	0.7892	0.7867	4.2933	1.1172	12.8444	0.9461	0.8193	5.9785	1.8442	1.2974	0.9338	1.4753	2.0068	2.4991	0.1266	0.013	0.2072	0.3205	5.0827	1.748	1.0192
TCGA-DU-7300	1886	1	1	FEMALE	Oligodendroglioma	53	Right	G3	Mutant	codel	Methylated	Mutant	WT	YES	YES	Non-response	Non-response	1.3867	2.0618	1.6263	0.6148	0.5617	0.5531	0.6649	1.0345	0.8482	0.604	0.6017	3.2857	0.855	11.5515	0.724	0.627	4.5755	1.4114	0.993	0.7147	1.1295	1.7493	1.9127	7.9114	0.0058	3.8111	6.0308	8.0377	1.417	0.78
TCGA-DU-7301	788	1	1	MALE	Oligodendroglioma	53	Left	G2	Mutant	non-codel	Methylated	WT	Mutant	YES	YES	Non-response	Non-response	1.5259	2.2689	1.7897	0.6765	0.6181	0.6063	0.7309	1.1384	0.9264	0.6646	0.6626	3.6157	0.9409	12.4175	0.7968	0.69	5.035	1.5532	1.0927	0.7864	1.243	1.5788	2.1047	6.9632	0.0088	3.8287	5.3117	2.8868	1.5594	0.8583
TCGA-DU-7302	1834	0	1	FEMALE	Oligodendroglioma	48	Left	G3	Mutant	codel	Methylated	Mutant	WT	YES	NA	Non-response	Non-response	1.5659	2.3283	1.8365	0.6942	0.6343	0.6245	0.7507	1.1682	0.9544	0.682	0.68	3.7104	0.9655	8.8894	0.8176	0.7081	5.1669	1.5931	1.1213	0.807	1.2755	1.9492	2.1599	0.2183	0.0054	4.2827	6.9273	8.9624	1.6002	0.8808
TCGA-DU-7304	709	1	1	MALE	Oligoastrocytoma	43	Left	G3	Mutant	non-codel	Methylated	WT	Mutant	YES	YES	Non-response	Non-response	1.5212	2.262	1.7842	0.6744	0.6163	0.6057	0.7291	1.1349	0.9303	0.6626	0.6605	3.6047	0.938	12.6722	0.7943	0.6879	5.0102	1.5286	1.0893	0.784	1.2391	1.9056	2.0983	1.8485	0.0111	4.0984	3.9371	8.7884	1.5545	0.8557
TCGA-DU-7306	1277	0	1	MALE	Oligoastrocytoma	67	Right	G2	Mutant	non-codel	Methylated	WT	Mutant	YES	YES	Non-response	NA	1.4958	2.2242	1.7544	0.6632	0.606	0.5949	0.7172	1.1159	0.913	0.6515	0.6496	3.5444	0.9223	12.4157	0.781	0.6764	4.9357	1.5226	1.0711	0.7709	1.2184	1.8932	2.0632	0.9217	0.0128	4.1108	6.6896	8.2704	1.5286	0.8414
TCGA-DU-7309	84	0	1	FEMALE	Oligodendroglioma	41	Left	G3	Mutant	non-codel	Methylated	WT	Mutant	YES	YES	Non-response	NA	1.5618	2.3223	1.8318	0.6924	0.6327	0.6214	0.7488	1.1651	0.9521	0.6803	0.6783	3.7008	0.963	12.8303	0.8155	0.7062	5.1535	1.5897	1.1184	0.8049	1.2722	1.8961	2.1542	2.1001	0.008	4.2774	6.6714	3.6278	1.596	0.8785
TCGA-DU-8158	155	1	2	FEMALE	Astrocytoma	57	Left	G3	WT	non-codel	Unmethylated	Mutant	WT	YES	YES	NA	NA	0.0064	0.0096	2.9364	1.2742	1.1643	1.1397	1.3648	2.0504	1.7078	1.2519	1.2433	0.0003	0.0035	0.0068	1.5001	1.2992	9.4819	2.9209	2.0227	1.4813	0.2926	0.9905	0.2334	0.025	0.0175	0.0252	0.0276	0.2481	0.0008	0.027
TCGA-DU-8161	722	1	2	FEMALE	Oligoastrocytoma	63	Left	G3	WT	non-codel	Unmethylated	Mutant	WT	YES	YES	Non-response	Non-response	0.0032	0.0076	2.7284	1.0518	0.961	0.9419	1.1271	1.7696	1.405	1.0333	0.5309	0.0076	0.0002	0.004	1.2374	1.0728	7.8282	2.4148	1.6988	1.2227	1.9116	2.876	3.2723	0.0105	0.0342	0.1994	9.1193	0.4522	2.4244	0.0053
TCGA-DU-8162	444	1	2	FEMALE	Oligoastrocytoma	61	Right	G3	WT	non-codel	Unmethylated	WT	WT	YES	YES	Non-response	NA	0.0061	0.0323	2.813	1.1469	1.0478	1.0203	1.236	1.9294	1.5482	1.1267	1.1061	0.0031	0.0269	0.0069	1.3507	1.1698	8.5357	2.6331	1.8524	1.3332	2.1071	0.6638	3.5679	0.0823	0.0022	1.0116	0.5121	0.3444	2.6115	0.5177
TCGA-DU-8163	629	0	2	MALE	Oligoastrocytoma	29	Left	G3	Mutant	non-codel	Unmethylated	WT	Mutant	YES	YES	Non-response	NA	0.0045	0.0173	0.7998	1.3067	1.1937	1.1663	1.408	0.7164	1.7591	1.2831	1.2731	0.0005	0.0016	0.0057	1.539	1.3328	9.7211	2.0366	2.1104	1.519	2.3798	0.4163	2.7007	0.0361	0.0239	0.3122	0.1102	0.0902	0.3774	0.0219
TCGA-DU-8164	651	0	2	MALE	Oligodendroglioma	51	Right	G2	Mutant	codel	Methylated	Mutant	WT	YES	NA	Non-response	Non-response	0.001	0.0051	0.8702	1.3277	1.2131	1.185	1.4227	1.295	1.7807	1.3039	0.705	0.0005	0.0001	0.0039	1.5635	1.3542	9.3627	3.036	2.1442	1.5434	2.4273	0.577	2.0905	0.0066	0.0142	0.2601	0.0694	0.0958	0.2273	0.0003
TCGA-DU-8165	582	0	2	FEMALE	Oligodendroglioma	60	Left	G3	WT	non-codel	Unmethylated	Mutant	WT	YES	YES	Non-response	Non-response	0.2378	0.0578	2.9439	1.1725	1.0712	1.0525	1.2659	1.9729	1.5516	1.1519	0.8335	0.002	1.131	0.018	1.3809	1.1959	8.7265	2.6073	1.8938	1.363	2.0005	0.9821	2.9794	0.0964	0.0142	0.1189	0.089	0.4588	0.006	1.4865
TCGA-DU-8166	516	0	2	FEMALE	Oligoastrocytoma	29	Left	G2	Mutant	non-codel	Methylated	WT	Mutant	YES	YES	Non-response	Non-response	0.0023	0.0147	0.8634	1.2609	1.1521	1.1288	1.3546	2.1216	1.6951	1.2383	1.2277	0.0005	0	0.0039	1.4849	1.2861	9.3846	2.8949	2.0366	1.4658	2.2921	1.2423	3.359	0.0063	0.015	0.2116	0.1182	0.1351	0.1504	0.0005
TCGA-DU-8167	471	0	2	FEMALE	Oligoastrocytoma	69	Right	G2	Mutant	non-codel	Methylated	WT	WT	NA	YES	Non-response	Non-response	0.0085	0.0055	2.7684	1.0465	0.9562	0.9388	1.1273	1.7533	1.4137	1.0281	1.0201	0.0155	0.0002	0.005	1.2325	1.0674	7.7889	2.2849	1.6903	1.2166	1.9228	2.6773	3.2559	0.088	0.0037	3.88	2.004	2.4723	2.4122	0.5876
TCGA-DU-8168	431	0	2	FEMALE	Oligodendroglioma	55	Right	G3	Mutant	codel	Methylated	Mutant	WT	YES	YES	Non-response	Non-response	0.0397	0.0052	2.6966	1.1425	1.0439	1.0245	1.2341	1.922	1.5382	1.1224	1.1191	0.0024	0.0031	0.0074	1.3455	1.1653	8.5029	2.6168	1.8453	1.3281	2.0988	1.5064	3.5543	0.0588	0.0096	0.4557	0.4778	0.3221	2.4193	0.2258
TCGA-DU-A5TP	1012	0	1	MALE	Astrocytoma	33	Right	G3	Mutant	non-codel	Methylated	WT	Mutant	YES	YES	NA	Non-response	2.0054	2.9818	2.3444	0.8891	0.8124	0.7963	0.9411	1.496	1.2036	0.8735	0.8676	4.7518	1.2365	13.1871	1.0469	0.9068	6.617	2.0412	1.436	1.0335	1.0539	1.0794	2.452	0.112	0.0058	0.0363	0.1036	1.0501	0.0074	1.128
TCGA-DU-A5TR	908	0	1	MALE	Oligoastrocytoma	51	Left	G2	Mutant	non-codel	Methylated	WT	Mutant	YES	YES	NA	Non-response	1.8031	2.6811	2.1148	0.7994	0.7304	0.7168	0.8622	1.3434	1.098	0.7854	0.782	4.2726	1.1118	13.9708	0.9415	0.8154	5.9497	1.8322	1.2912	0.9293	1.4651	2.1318	2.4014	0.1291	0.0165	0.1546	0.0797	6.3352	0.0364	1.0143
TCGA-DU-A5TS	964	0	1	MALE	Oligodendroglioma	42	Right	G2	Mutant	non-codel	Methylated	WT	Mutant	YES	YES	Non-response	Non-response	2.0095	2.9879	2.151	0.8909	0.814	0.7988	0.9552	1.4983	1.2233	0.8752	0.8131	4.7615	1.239	14.7244	1.0492	0.9087	6.6306	2.0446	1.4387	1.0356	0.9461	1.1391	0.5343	0.8835	0.032	0.0459	0.0345	0.3389	0.0049	1.1303
TCGA-DU-A5TT	743	0	1	MALE	Oligodendroglioma	70	Left	G3	WT	non-codel	Methylated	Mutant	WT	YES	YES	NA	Non-response	1.5592	2.3183	1.8287	0.6913	0.6316	0.6204	0.7461	1.1632	0.9515	0.6791	0.6771	3.6945	0.9613	12.9145	0.8141	0.705	5.1447	1.5784	1.1165	0.8036	1.27	1.9811	2.1506	0.3711	0.0467	4.2855	3.3532	8.6421	1.5922	0.877
TCGA-DU-A5TU	796	0	1	FEMALE	Astrocytoma	62	Left	G2	Mutant	non-codel	Methylated	WT	Mutant	YES	YES	Non-response	Non-response	1.7922	2.6648	2.1019	0.7946	0.7259	0.7119	0.8544	1.3365	1.0913	0.7806	0.7747	4.2466	1.105	14.8501	0.9357	0.8104	5.9135	1.8242	1.2833	0.9236	1.3934	1.6862	2.4671	3.4973	0.0043	0.0551	0.2229	2.9728	0.019	1.0081
TCGA-DU-A5TW	760	0	1	FEMALE	Astrocytoma	33	Right	G3	Mutant	non-codel	Methylated	WT	Mutant	NA	NA	Non-response	Non-response	1.7297	2.5719	2.0287	0.7669	0.7007	0.6892	0.8279	1.2904	1.047	0.7534	0.7362	4.0986	1.0665	12.7286	0.9032	0.7822	5.7074	1.7606	1.2386	0.8915	1.4089	1.4334	2.3858	0.1921	0.0047	4.7346	3.5639	1.4675	1.7676	0.973
TCGA-DU-A5TY	1033	1	1	FEMALE	Astrocytoma	46	Left	G3	WT	non-codel	Methylated	Mutant	WT	YES	YES	NA	Non-response	1.8402	2.7362	2.1583	0.8159	0.7455	0.7338	0.8742	1.3723	1.1036	0.8015	0.754	4.3604	1.1346	12.6459	0.9608	0.8321	6.072	1.8729	1.3177	0.9484	1.498	1.5748	2.5382	0.1207	0.0057	0.1165	0.6228	4.5737	1.8417	1.0351
TCGA-DU-A6S2	777	0	1	FEMALE	Oligodendroglioma	37	Right	G2	Mutant	codel	Methylated	NA	WT	NA	NA	Non-response	Non-response	1.4938	2.2212	1.752	0.6623	0.6051	0.5952	0.7162	1.1144	0.913	0.6507	0.6487	3.5397	0.9211	12.3659	0.78	0.6755	4.9287	1.5205	1.0697	0.7699	1.2168	1.8992	2.0605	0.7678	0.0082	4.1059	6.6072	8.6598	1.5266	0.8403
TCGA-DU-A6S3	656	0	1	MALE	Oligodendroglioma	60	Right	G2	Mutant	codel	Methylated	NA	WT	NA	NA	Non-response	NA	1.2959	1.927	1.52	0.5746	0.525	0.5166	0.6209	0.9667	0.785	0.5645	0.5628	3.0708	0.7991	10.8098	0.6767	0.586	4.2762	1.3191	0.928	0.6679	1.0556	1.6119	1.7875	18.4208	0.9373	3.0665	5.8227	2.4287	1.3243	0.729
TCGA-DU-A6S6	2893	0	1	FEMALE	Oligoastrocytoma	35	Right	G2	Mutant	codel	Methylated	NA	WT	YES	NA	NA	Non-response	1.6851	2.5056	1.9764	0.7471	0.6826	0.6698	0.8038	1.2571	1.0224	0.734	0.7314	3.9928	1.039	7.3203	0.8799	0.762	5.538	1.7141	1.2067	0.8685	1.3726	2.1058	2.3243	0.1487	0.0056	4.6243	5.5814	6.3252	1.722	0.9479
TCGA-DU-A6S7	638	0	1	FEMALE	Astrocytoma	27	Left	G3	Mutant	non-codel	Methylated	NA	Mutant	YES	YES	Non-response	Non-response	1.3206	1.9636	1.4573	0.5855	0.5349	0.5248	0.6311	0.9846	0.7983	0.5752	0.5528	3.1291	0.8142	11.0152	0.6895	0.5972	4.3574	1.3442	0.9456	0.6806	1.0757	1.6527	1.8215	18.8183	0.9715	3.6051	5.917	0.1951	1.3495	0.7428
TCGA-DU-A6S8	678	0	2	FEMALE	Oligodendroglioma	74	Right	G3	Mutant	codel	Methylated	NA	WT	YES	NA	Non-response	NA	1.7741	2.6379	2.0808	0.7866	0.7187	0.7051	0.8477	1.3228	1.0703	0.7727	0.7684	4.2023	1.0939	3.9773	0.9263	0.8023	5.854	1.8058	1.2704	0.9143	1.4451	2.0146	2.4471	0.0256	0.0161	4.7282	7.7195	3.6678	1.813	0.998
TCGA-DU-A76K	347	1	1	MALE	Oligodendroglioma	87	Right	G2	WT	non-codel	Unmethylated	NA	WT	YES	YES	NA	NA	1.6581	2.4655	1.9447	0.7351	0.6717	0.6605	0.795	1.237	1.011	0.7222	0.7201	3.929	1.0224	12.7564	0.8658	0.7498	5.4712	1.6869	1.1873	0.8546	1.3506	2.0963	2.287	0.1571	0.0078	4.5574	0.7743	6.9967	1.6926	0.9327
TCGA-DU-A76L	814	1	1	MALE	Oligodendroglioma	54	Right	G3	WT	non-codel	Methylated	NA	WT	YES	YES	NA	NA	1.6086	2.3918	1.8866	0.7132	0.6516	0.6398	0.7697	1.2	0.9814	0.7006	0.6971	3.8116	0.9918	13.2319	0.8399	0.7274	5.3077	1.6371	1.1519	0.829	1.3103	1.8714	2.2187	0.9037	0.0043	3.423	4.7852	5.1631	1.6438	0.9048
TCGA-DU-A76O	522	0	1	MALE	Astrocytoma	30	Left	G2	Mutant	non-codel	Methylated	NA	Mutant	YES	YES	NA	NA	1.7003	2.5281	1.9906	0.7538	0.6885	0.6773	0.8145	1.2675	1.0385	0.7406	0.6184	4.0288	1.0483	13.9945	0.8878	0.7689	5.6102	1.7305	1.2175	0.8763	1.385	0.8756	2.3452	0.8915	0.0046	4.1134	5.7263	0.4111	1.7375	0.9564
TCGA-DU-A76R	648	1	1	MALE	Oligodendroglioma	51	Right	G3	Mutant	codel	Methylated	NA	WT	YES	YES	NA	NA	1.7209	2.5588	2.0183	0.763	0.6971	0.6812	0.8236	1.2811	1.0383	0.7495	0.7463	4.0777	1.0611	13.5508	0.8985	0.7782	4.6127	1.6829	1.2323	0.8869	1.4018	1.6147	2.3736	0.1825	0.0234	2.2107	5.1334	2.9263	1.7586	0.968
TCGA-DU-A7T6	547	1	1	FEMALE	Oligodendroglioma	73	Right	G3	Mutant	codel	Methylated	NA	WT	NA	NA	NA	NA	1.7728	2.636	2.0792	0.786	0.7182	0.7055	0.8499	1.3226	1.0776	0.7722	0.7699	4.2008	1.0931	14.528	0.9257	0.8017	5.8497	1.8044	1.2695	0.9137	1.4441	1.5116	2.4453	0.6834	0.0077	2.6746	0.8192	1.9391	1.8115	0.9972
TCGA-DU-A7T8	4229	1	1	MALE	Oligoastrocytoma	35	Right	G3	Mutant	non-codel	Methylated	NA	Mutant	YES	YES	Non-response	Non-response	1.6904	2.5135	1.9826	0.7494	0.6847	0.6721	0.8078	1.2607	1.0234	0.7363	0.7341	4.0055	1.0423	13.7292	0.8826	0.7644	5.5584	1.7164	1.2105	0.8712	1.3763	2.0076	2.3312	1.3007	0.0032	0.3685	0.8636	7.9143	1.5182	0.9509
TCGA-DU-A7TA	2565	0	1	MALE	Oligodendroglioma	32	Right	G2	Mutant	non-codel	Methylated	NA	Mutant	YES	YES	Non-response	NA	1.8469	2.7462	2.1661	0.8188	0.7482	0.7314	0.877	1.3746	1.123	0.8044	0.8005	4.3762	1.1388	11.1079	0.9642	0.8352	6.0941	1.8558	1.3225	0.9519	1.4815	1.5428	2.547	0.2217	0.0103	0.1211	0.4423	5.7068	1.8026	1.0389
TCGA-DU-A7TB	1567	0	1	MALE	Oligodendroglioma	56	Right	G2	WT	non-codel	Unmethylated	NA	WT	YES	YES	Non-response	Non-response	1.9156	2.8484	2.207	0.8493	0.776	0.7616	0.9114	1.3866	1.1689	0.8344	0.8315	4.5391	1.1811	15.7761	1.0002	0.8662	6.3203	1.9498	1.3717	0.9873	1.5586	0.9334	2.544	0.9939	0.006	0.1855	0.0577	0.2876	0.0255	1.0776
TCGA-DU-A7TC	1137	0	1	MALE	Astrocytoma	32	Right	G2	Mutant	non-codel	Methylated	NA	WT	NA	NA	NA	NA	2.2773	3.3861	2.6371	1.0096	0.9225	0.8963	1.076	0.2091	1.3671	0.9919	0.9863	5.3961	1.4041	14.7522	1.1871	1.0277	0.619	1.9658	1.6152	1.1737	0.0587	1.1481	0.1412	0.0375	0.0054	0.0085	0.0329	0.6381	0.0001	1.281
TCGA-DU-A7TD	228	1	1	MALE	Oligoastrocytoma	52	Right	G3	WT	non-codel	Unmethylated	NA	WT	YES	YES	NA	NA	1.8253	2.714	2.1406	0.8092	0.7394	0.7234	0.864	0.2947	1.1162	0.795	0.792	4.3251	1.1254	14.983	0.9518	0.8254	6.0223	1.8575	1.3071	0.9407	1.4826	1.3376	2.5133	4.3586	0.0113	0.122	0.1637	0.8482	1.1257	1.0267
TCGA-DU-A7TG	1351	1	1	MALE	Oligodendroglioma	40	Right	G2	Mutant	non-codel	Methylated	NA	WT	YES	NA	NA	NA	1.2479	1.8556	1.4636	0.5533	0.5055	0.4968	0.5982	0.931	0.7637	0.5435	0.54	2.957	0.7694	10.4093	0.6516	0.5643	4.1177	1.2698	0.8936	0.6432	1.0165	1.5632	1.7213	17.6827	0.2013	2.8396	5.5846	6.9546	1.2753	0.702
TCGA-DU-A7TI	1183	1	2	MALE	Astrocytoma	32	Left	G3	NA	non-codel	Methylated	NA	NA	YES	YES	NA	NA	2.3554	3.5023	2.7626	1.0443	0.9542	0.9339	1.078	0.5281	1.4219	1.0259	1.0229	5.5407	1.4523	1.3155	1.2269	1.0651	7.6583	2.2668	1.4969	1.2139	0.0995	1.7433	0.0513	0.0441	0.0075	0.0121	0.011	3.0309	0.0016	1.3249
TCGA-DU-A7TJ	17	0	2	MALE	Astrocytoma	55	Right	G3	WT	non-codel	Methylated	NA	WT	NA	NA	NA	NA	1.8995	2.8243	2.0807	0.8421	0.7695	0.7539	0.9104	1.4133	1.1557	0.8273	0.8245	4.4964	1.1712	4.0354	0.9918	0.8589	6.2675	1.9334	1.3602	0.9789	1.5472	1.0647	2.62	0.0558	0.0092	4.9465	6.5029	0.2922	1.9411	1.0685
TCGA-E1-A7YD	435	1	1	MALE	Astrocytoma	57	Left	G3	WT	non-codel	Unmethylated	NA	WT	YES	YES	NA	NA	1.2263	1.8235	1.4383	0.5437	0.4968	0.4892	0.588	0.9149	0.7505	0.5341	0.5325	2.9059	0.7561	10.2292	0.6403	0.5545	4.0465	1.2483	0.8782	0.632	0.9989	1.5563	1.6915	17.4515	0.9023	3.3702	5.5189	7.1034	1.2532	0.6898
TCGA-E1-A7YE	886	1	1	FEMALE	Astrocytoma	32	Left	G3	Mutant	non-codel	Unmethylated	NA	Mutant	YES	YES	Non-response	Non-response	1.3099	1.9477	1.5363	0.5808	0.5306	0.5222	0.6268	0.9772	0.8016	0.5705	0.5687	3.1039	0.8077	10.9263	0.684	0.5923	4.3223	1.3333	0.938	0.6751	1.067	1.4279	1.8068	18.4451	0.0298	3.5118	3.1876	4.9454	1.3386	0.7368
TCGA-E1-A7YH	2835	1	1	FEMALE	Astrocytoma	47	Right	G3	Mutant	non-codel	Methylated	NA	Mutant	YES	YES	Non-response	Non-response	1.2555	1.8667	1.4725	0.5566	0.5086	0.5003	0.6005	0.9365	0.7676	0.5468	0.5448	2.9748	0.7741	10.472	0.6555	0.5677	4.1425	1.2779	0.899	0.647	1.0226	1.5863	1.7317	17.7709	0.9227	2.7353	5.6473	5.7481	1.283	0.7062
TCGA-E1-A7YI	111	1	1	FEMALE	Astrocytoma	33	Right	G3	Mutant	non-codel	Methylated	NA	Mutant	NA	NA	NA	NA	1.2839	1.9091	1.5058	0.5692	0.5201	0.512	0.6155	0.9578	0.781	0.5592	0.5576	3.0423	0.7916	10.7095	0.6704	0.5806	4.2365	1.3069	0.9194	0.6617	1.0458	1.5721	1.7709	18.2904	0.9433	3.3889	5.1161	3.5911	1.3121	0.7222
TCGA-E1-A7YJ	592	1	1	MALE	Astrocytoma	55	Right	G3	WT	non-codel	Unmethylated	NA	WT	YES	YES	Non-response	Non-response	1.2258	1.8227	1.4377	0.5435	0.4966	0.4889	0.5877	0.9145	0.7502	0.5339	0.5323	2.9046	0.7558	10.2248	0.64	0.5543	4.0447	1.2477	0.8778	0.6318	0.9985	1.5584	1.6908	17.4859	0.902	3.3683	5.5179	7.106	1.2527	0.6895
TCGA-E1-A7YK	378	1	1	MALE	Astrocytoma	52	Left	G3	Mutant	non-codel	Methylated	NA	Mutant	YES	YES	Non-response	NA	1.2266	1.8239	1.4387	0.5438	0.4969	0.4892	0.5881	0.915	0.7507	0.5343	0.5325	2.9066	0.7563	10.2317	0.6405	0.5547	4.0475	1.2486	0.8784	0.6322	0.9992	1.539	1.6919	17.4978	0.9026	3.3244	5.5199	7.1109	1.2535	0.69
TCGA-E1-A7YL	492	1	1	MALE	Astrocytoma	46	Right	G3	WT	non-codel	Unmethylated	NA	WT	YES	YES	Non-response	Non-response	1.2701	1.8886	1.4897	0.5631	0.5145	0.5061	0.6065	0.9463	0.7773	0.5532	0.5514	3.0096	0.7831	10.5945	0.6632	0.5744	4.191	1.2928	0.9095	0.6546	1.0346	1.5874	1.7519	18.1175	0.9346	3.487	5.7141	3.7888	1.298	0.7145
TCGA-E1-A7YM	648	1	1	MALE	Astrocytoma	63	Left	G3	WT	non-codel	Unmethylated	NA	WT	YES	YES	Non-response	Non-response	1.2352	1.8366	1.4487	0.5476	0.5004	0.492	0.5912	0.9211	0.7559	0.538	0.5358	2.9268	0.7616	10.303	0.6449	0.5585	4.0757	1.2573	0.8845	0.6366	1.0061	1.5261	1.7037	17.5068	0.9088	3.0871	5.4306	6.9954	1.2622	0.6948
TCGA-E1-A7YN	727	1	1	FEMALE	Astrocytoma	63	Right	G3	WT	non-codel	Methylated	NA	WT	YES	YES	Non-response	Non-response	1.2262	1.8233	1.4381	0.5436	0.4967	0.4887	0.586	0.9148	0.7504	0.5341	0.5325	2.9055	0.7561	10.2281	0.6403	0.5545	4.046	1.2481	0.8781	0.632	0.9988	1.5568	1.6913	17.4912	0.9023	3.342	5.5197	7.108	1.2531	0.6897
TCGA-E1-A7YO	2282	1	1	MALE	Oligodendroglioma	45	Right	G3	Mutant	codel	Methylated	NA	WT	YES	NA	NA	Non-response	1.2825	1.907	1.5042	0.5686	0.5196	0.5111	0.6149	0.9568	0.7848	0.5586	0.5568	3.039	0.7908	10.6979	0.6697	0.58	4.2319	1.3054	0.9184	0.661	1.0447	1.6047	1.769	17.9686	0.5948	3.514	5.7331	3.5559	1.3106	0.7214
TCGA-E1-A7YS	466	1	1	MALE	Oligodendroglioma	71	Left	G3	Mutant	codel	Methylated	NA	WT	YES	YES	Non-response	Non-response	1.226	1.823	1.438	0.5436	0.4967	0.4889	0.5868	0.9147	0.7503	0.534	0.5324	2.9052	0.756	10.2267	0.6402	0.5544	4.0455	1.248	0.8779	0.6319	0.9987	1.559	1.6911	17.4656	0.9022	3.3699	5.5161	7.1074	1.2529	0.6897
TCGA-E1-A7YU	23	1	1	MALE	Oligoastrocytoma	42	NA	G3	Mutant	non-codel	Methylated	NA	WT	YES	NA	NA	NA	1.2306	1.8298	1.4433	0.5456	0.4985	0.4897	0.5899	0.9181	0.7531	0.536	0.5344	2.916	0.7588	10.2649	0.6426	0.5565	4.0606	1.2526	0.8812	0.6342	1.0024	1.5599	1.6974	17.5477	0.9025	3.357	5.5374	6.8124	1.2576	0.6922
TCGA-E1-A7YV	987	1	1	FEMALE	Oligoastrocytoma	26	Left	G3	Mutant	non-codel	Methylated	NA	Mutant	YES	YES	Non-response	Non-response	1.2293	1.8279	1.4418	0.545	0.498	0.4902	0.589	0.917	0.7523	0.5354	0.5328	2.9129	0.758	10.254	0.6419	0.5559	4.0563	1.2513	0.8803	0.6336	1.0013	1.5393	1.6956	17.4995	0.9043	3.3191	5.4419	7.0503	1.2562	0.6915
TCGA-E1-A7YW	1120	1	1	MALE	Oligoastrocytoma	28	Left	G2	Mutant	non-codel	Methylated	NA	Mutant	YES	YES	Non-response	Non-response	1.2271	1.8246	1.4392	0.544	0.4971	0.4885	0.5871	0.9154	0.7507	0.5345	0.5327	2.9076	0.7566	10.2354	0.6407	0.5549	4.0479	1.2357	0.8787	0.6324	0.9995	1.5592	1.6925	17.4959	0.9029	3.2939	5.5223	7.1127	1.254	0.6902
TCGA-E1-A7YY	4445	1	1	FEMALE	Oligodendroglioma	27	Right	G2	Mutant	non-codel	Methylated	NA	WT	YES	YES	Non-response	Non-response	1.3489	2.0057	1.2608	0.598	0.5464	0.5375	0.6428	0.9556	0.8255	0.5875	0.5858	3.1963	0.8317	11.2515	0.7043	0.61	4.4473	1.3711	0.9659	0.6952	1.0988	1.488	1.8606	19.1813	0.7001	2.9312	5.9701	0.1305	1.3785	0.7588
TCGA-E1-A7Z2	398	1	1	FEMALE	Oligodendroglioma	58	Left	G2	WT	non-codel	Unmethylated	NA	WT	YES	YES	Non-response	Non-response	1.2996	1.9323	1.5242	0.5762	0.5265	0.5175	0.6231	0.9662	0.7953	0.566	0.5617	3.0794	0.8013	10.8401	0.6786	0.5877	4.2881	1.3228	0.9306	0.6698	1.0586	1.5489	1.7925	18.5355	0.0832	2.8731	5.842	3.223	1.328	0.731
TCGA-E1-A7Z3	2235	1	1	FEMALE	Astrocytoma	31	Right	G2	Mutant	non-codel	Methylated	NA	Mutant	YES	YES	Non-response	Non-response	1.2344	1.8355	1.4478	0.5473	0.5001	0.4918	0.5916	0.9166	0.7554	0.5377	0.5333	2.925	0.7611	10.2965	0.6445	0.5582	4.0731	1.2561	0.8839	0.6362	1.0055	1.5638	1.7026	17.6083	0.9083	3.3926	5.5552	6.713	1.2615	0.6944
TCGA-E1-A7Z4	4412	1	1	MALE	Astrocytoma	35	Left	G2	Mutant	non-codel	Methylated	NA	Mutant	YES	YES	Non-response	Non-response	1.2512	1.8604	1.4675	0.5547	0.5069	0.4981	0.5991	0.9334	0.7657	0.545	0.5434	2.9647	0.7715	10.4365	0.6533	0.5658	4.1285	1.2735	0.896	0.6448	1.0192	1.5863	1.7258	17.8458	0.9207	3.4314	5.6263	5.2016	1.2786	0.7038
TCGA-E1-A7Z6	984	1	1	FEMALE	Astrocytoma	41	Right	G2	Mutant	non-codel	Methylated	NA	Mutant	YES	YES	Non-response	Non-response	1.4555	2.1642	1.7071	0.6453	0.5896	0.5804	0.6951	1.0858	0.8907	0.634	0.6321	3.4489	0.8974	12.1407	0.76	0.6582	4.8027	1.4815	1.0423	0.7501	1.1841	1.0157	2.0033	20.3221	0.0297	0.2778	0.1559	2.5882	1.0437	0.8187
TCGA-EZ-7264	1201	0	2	FEMALE	Oligodendroglioma	47	Right	G2	Mutant	codel	Methylated	Mutant	WT	NA	NA	Non-response	Non-response	1.9598	2.4995	2.3088	0.8728	0.7974	0.7844	0.9428	1.4686	1.1785	0.8574	0.8549	0.3077	1.2138	0.0618	1.0279	0.8902	6.4955	2.0037	1.4096	1.0145	1.6035	1.8036	2.7152	0.0255	0.0136	4.5016	8.1642	3.8091	2.0117	1.1073
TCGA-F6-A8O3	7	0	1	MALE	Oligodendroglioma	34	NA	G2	Mutant	codel	Methylated	NA	WT	NA	NA	NA	NA	1.2277	1.8255	1.4399	0.5443	0.4973	0.4892	0.5885	0.9158	0.7513	0.5347	0.5008	2.9091	0.757	10.2405	0.641	0.5552	4.0509	1.2496	0.8791	0.6327	1	1.5596	1.6934	17.5102	0.9033	3.3625	5.5217	7.082	1.2546	0.6906
TCGA-F6-A8O4	6	0	1	MALE	Astrocytoma	44	Left	G2	Mutant	non-codel	Methylated	NA	Mutant	NA	NA	NA	NA	1.2342	1.8351	1.4475	0.5472	0.5	0.4923	0.5911	0.4141	0.7553	0.5376	0.536	2.9244	0.761	10.2946	0.6444	0.5581	4.072	1.2512	0.8838	0.6361	1.0053	1.567	1.7023	17.6054	0.908	3.3797	5.5538	7.0143	1.2612	0.6942
TCGA-FG-5962	1453	0	1	MALE	Oligodendroglioma	54	Left	G3	Mutant	codel	Methylated	Mutant	WT	YES	YES	Non-response	Non-response	1.3009	1.9343	1.5257	0.5767	0.527	0.5188	0.6236	0.9705	0.7961	0.5666	0.5649	3.0825	0.8021	10.8509	0.6792	0.5882	4.2924	1.3241	0.9315	0.6704	1.0596	1.6345	1.7943	18.5513	0.0521	3.5692	5.8288	2.3735	1.3294	0.7317
TCGA-FG-5963	775	1	1	MALE	Astrocytoma	23	Right	G3	WT	non-codel	Unmethylated	WT	Mutant	YES	YES	Non-response	Non-response	1.226	1.8229	1.4379	0.5435	0.4966	0.4884	0.5878	0.9146	0.7503	0.534	0.5324	2.9049	0.7559	10.226	0.6401	0.5544	4.0452	1.2479	0.8779	0.6318	0.9986	1.5565	1.691	17.4873	0.9016	3.3694	5.5175	7.1033	1.2528	0.6896
TCGA-FG-5964	1588	0	2	MALE	Oligodendroglioma	62	Left	G2	Mutant	codel	Methylated	Mutant	WT	NA	YES	Non-response	Non-response	2.1748	3.2337	2.5216	0.9642	0.881	0.8646	1.0398	1.6224	1.3054	0.9472	0.9443	5.15	1.3409	4.8367	1.1355	0.9834	7.176	2.2136	1.5573	1.1208	1.7569	1.2305	2.5544	0.0112	0.0561	0.1059	0.0413	1.1758	0.0664	1.2233
TCGA-FG-5965	1120	1	1	FEMALE	Oligoastrocytoma	39	Right	G2	Mutant	non-codel	Methylated	WT	Mutant	YES	YES	Non-response	Non-response	1.2388	1.8419	1.4529	0.5492	0.5018	0.494	0.5929	0.924	0.7581	0.5396	0.538	2.9353	0.7638	10.3329	0.6468	0.5602	4.0875	1.2609	0.8871	0.6384	0.9802	1.5751	1.7086	17.6538	0.9114	3.3951	5.5672	7.1678	0.3212	0.6968
TCGA-FG-6688	571	0	1	FEMALE	Astrocytoma	59	Left	G3	WT	non-codel	Methylated	Mutant	WT	YES	YES	Non-response	Non-response	1.3081	1.945	1.5342	0.58	0.5299	0.5218	0.6254	0.9753	0.8005	0.5698	0.5681	3.0996	0.8066	10.9112	0.683	0.5915	4.3163	1.3315	0.9367	0.6742	1.0655	1.5383	1.8043	18.656	0.9623	3.151	5.8554	1.4813	1.3368	0.7358
TCGA-FG-6689	454	0	1	MALE	Astrocytoma	30	Right	G2	Mutant	non-codel	Methylated	NA	Mutant	YES	YES	Non-response	Non-response	1.4846	2.2075	1.6897	0.6582	0.6014	0.592	0.7102	1.107	0.9085	0.6466	0.6447	3.5178	0.9154	12.3834	0.7752	0.6713	4.8987	1.511	1.0631	0.7651	1.2092	0.7663	2.0328	21.0431	0.1105	0.3555	0.1082	0.4551	1.3441	0.8351
TCGA-FG-6690	1294	0	2	MALE	Oligodendroglioma	70	Left	G2	Mutant	non-codel	Methylated	WT	Mutant	NA	YES	Non-response	Non-response	2.2138	3.2916	2.5951	0.9815	0.8968	0.8807	1.0569	1.6514	1.322	0.9642	0.9607	5.1073	1.365	0.6734	1.1559	1.0011	7.3047	2.2533	1.5853	1.1409	1.8018	1.4599	2.4833	0.0999	0.0613	0.4848	0.0789	2.687	0.3553	1.2453
TCGA-FG-6691	1257	0	1	FEMALE	Astrocytoma	23	Right	G2	Mutant	non-codel	Unmethylated	WT	Mutant	YES	YES	Response	Non-response	1.3435	1.9977	1.5757	0.5956	0.5443	0.5342	0.643	0.9664	0.8217	0.5852	0.5834	3.1835	0.8284	11.2054	0.7015	0.6075	4.4323	1.3408	0.9621	0.6924	1.0944	1.6804	1.8531	19.0028	0.9886	0.6436	6.0096	1.5573	1.3729	0.7557
TCGA-FG-6692	561	1	2	MALE	Oligodendroglioma	63	Right	G3	WT	non-codel	Methylated	Mutant	WT	YES	YES	Non-response	Non-response	1.9219	2.8577	2.1547	0.8521	0.7786	0.766	0.9147	1.4335	1.1569	0.8371	0.8346	4.5233	1.185	1.5347	1.0035	0.8691	6.3417	1.9563	1.3763	0.9905	1.5655	1.8713	2.651	0.0346	0.0806	4.5566	7.7947	0.3624	1.964	1.0811
TCGA-FG-7634	467	0	2	MALE	Oligodendroglioma	28	Left	G2	Mutant	codel	Methylated	Mutant	WT	NA	NA	Non-response	Non-response	0.0115	0.0238	3.0205	1.1443	1.0453	1.0288	1.2262	1.9241	1.5369	1.1242	0.8806	0.0018	0.145	0.0086	1.3476	1.1671	8.5162	2.6256	1.8482	1.3302	2.101	1.3716	3.0153	0.3392	0.0593	0.477	0.0833	2.1065	0.8719	1.2849
TCGA-FG-7636	544	0	2	MALE	Astrocytoma	48	Left	G3	Mutant	non-codel	Methylated	WT	Mutant	YES	YES	Response	Response	1.7074	2.5387	2.0025	0.757	0.6916	0.6806	0.818	1.2737	1.0242	0.7437	0.7415	3.9531	1.0527	1.0552	0.8915	0.7721	5.6337	1.7379	1.2226	0.8799	1.3907	2.1101	2.355	0.0826	0.0127	4.6696	7.5501	9.6421	1.7448	0.9604
TCGA-FG-7637	1219	0	1	MALE	Oligoastrocytoma	49	Right	G2	Mutant	non-codel	Methylated	WT	WT	NA	NA	Non-response	Non-response	1.2409	1.8451	1.4554	0.5502	0.5027	0.4945	0.595	0.9258	0.7594	0.5405	0.5389	2.9404	0.7651	10.3509	0.6479	0.5611	4.0946	1.2631	0.8886	0.6395	1.0108	1.5753	1.7116	17.6983	0.9131	2.2211	5.5805	7.1541	1.2681	0.698
TCGA-FG-7638	686	0	2	FEMALE	Oligodendroglioma	31	Left	G3	Mutant	codel	Methylated	Mutant	Mutant	YES	YES	NA	Non-response	0.5711	0.0461	2.6595	1.0053	0.9186	0.9044	1.0869	1.6916	1.3571	0.9876	0.9847	0.0184	0.4358	0.0123	1.184	1.0254	7.4821	2.3081	1.6237	1.1686	1.847	2.635	3.1276	0.2209	0.0813	1.3226	0.9157	6.6445	2.3169	1.2747
TCGA-FG-7641	627	0	2	MALE	Oligodendroglioma	31	Left	G2	Mutant	codel	Methylated	Mutant	WT	NA	NA	Response	Non-response	1.0402	0.4157	2.0673	0.7815	0.714	0.7025	0.8446	1.315	1.0419	0.7677	0.7639	3.4908	1.0849	0.0265	0.9204	0.7971	5.8161	1.7941	1.2622	0.9084	1.4358	2.2276	2.4313	0.1682	0.869	4.8399	7.9242	10.2021	1.8013	0.9915
TCGA-FG-7643	611	0	1	FEMALE	Oligoastrocytoma	49	Right	G2	WT	non-codel	Methylated	Mutant	WT	NA	NA	Non-response	Non-response	1.5849	2.3565	1.8588	0.7027	0.642	0.6314	0.7593	1.1823	0.9508	0.6903	0.6879	3.7553	0.9772	6.7443	0.8275	0.7167	5.2295	1.6132	1.1349	0.8168	1.291	2.0146	2.186	0.1591	0.8497	4.3538	7.1268	9.1791	1.6196	0.8915
TCGA-FG-8181	862	0	2	MALE	Oligoastrocytoma	23	Left	G3	WT	non-codel	Unmethylated	WT	WT	YES	YES	Non-response	Non-response	2.0967	2.598	2.5154	0.9521	0.87	0.8549	1.0239	1.602	1.2802	0.9354	0.9273	0.1963	1.3241	0.0506	1.1213	0.9711	7.0862	2.1859	1.5378	1.1068	1.7493	2.5567	2.9622	0.0811	0.0115	2.0115	5.9634	0.6292	2.1946	1.208
TCGA-FG-8182	416	0	2	MALE	Oligodendroglioma	35	Left	G2	Mutant	non-codel	Methylated	WT	Mutant	NA	NA	Non-response	Non-response	0.0625	0.0522	0.0716	1.365	1.2472	1.2207	1.4733	0.1949	1.8394	1.0618	1.3351	0.0014	0.9931	0.0123	1.6075	1.3922	2.211	2.4034	2.2046	1.5849	2.5075	0.2487	2.6607	0.0081	0.0311	0.7444	0.1088	0.0617	0.0903	1.7242
TCGA-FG-8185	433	0	2	MALE	Astrocytoma	37	Right	G3	Mutant	non-codel	Methylated	WT	Mutant	YES	YES	Response	Response	1.5668	2.3297	1.8376	0.6947	0.6347	0.625	0.7512	1.1689	0.9246	0.6824	0.6804	3.7126	0.9661	3.8112	0.8181	0.7085	5.17	1.5948	1.122	0.8075	1.2763	1.9923	2.1611	3.9604	1.0153	4.3065	7.0488	9.0829	1.6011	0.8813
TCGA-FG-8186	487	0	1	FEMALE	Oligoastrocytoma	42	Right	G3	Mutant	codel	Methylated	Mutant	WT	NA	YES	Non-response	Non-response	1.2257	1.8225	1.4375	0.5434	0.4965	0.4887	0.5877	0.9144	0.7501	0.5339	0.5323	2.9043	0.7557	10.2238	0.64	0.5543	4.0443	1.2476	0.8777	0.6317	0.9984	1.5585	1.6906	17.4842	0.9019	3.3689	5.5174	7.1053	1.2525	0.6895
TCGA-FG-8187	611	0	2	MALE	Oligoastrocytoma	31	Right	G2	Mutant	codel	Methylated	Mutant	WT	NA	NA	Response	Non-response	2.284	1.0041	2.5425	1.1154	1.0192	0.9978	1.1973	1.8759	1.4964	1.0958	1.0908	0.0345	1.5511	0.0504	1.3137	1.1377	8.3017	2.5608	1.8015	1.2967	1.9795	1.4139	2.4878	0.0649	0.0351	0.1242	0.0714	0.683	0.098	1.4152
TCGA-FG-8188	455	0	1	MALE	Oligoastrocytoma	41	Left	G2	Mutant	non-codel	Methylated	WT	Mutant	NA	YES	Non-response	NA	1.3304	1.9781	1.5603	0.5898	0.5389	0.5301	0.6353	0.9922	0.8142	0.5794	0.5777	3.1523	0.8203	11.0968	0.6946	0.6016	4.3897	1.3541	0.9526	0.6856	1.0837	1.5151	1.835	18.9656	0.5401	1.7143	5.2365	2.5071	1.3595	0.7483
TCGA-FG-8189	685	0	1	FEMALE	Oligodendroglioma	33	Right	G2	Mutant	non-codel	Methylated	WT	WT	YES	YES	Non-response	Non-response	1.4064	2.0912	1.6495	0.6235	0.5697	0.5608	0.6743	1.0492	0.86	0.6126	0.6107	3.3325	0.8671	11.7272	0.7343	0.636	4.6406	1.4315	1.0071	0.7248	1.1456	1.7859	1.9398	5.574	0.8428	3.8655	6.3192	8.1091	1.4372	0.7911
TCGA-FG-8191	992	0	2	MALE	Oligodendroglioma	30	Right	G3	Mutant	non-codel	Unmethylated	WT	Mutant	YES	YES	Non-response	Non-response	2.4048	3.4569	2.8212	1.067	0.9749	0.9594	1.1506	1.6262	1.448	1.0483	1.0439	0.9479	1.4839	0.1491	1.2566	1.0883	7.7939	2.4449	1.7233	1.2404	1.555	1.5538	2.3982	0.043	0.0198	0.0509	0.054	1.4847	0.0028	1.3538
TCGA-FG-A4MT	1164	0	1	FEMALE	Oligodendroglioma	27	Left	G2	Mutant	non-codel	Methylated	WT	Mutant	NA	YES	Response	Response	1.2263	1.8234	1.4383	0.5437	0.4968	0.4895	0.588	0.9148	0.7505	0.5341	0.5325	2.9058	0.7561	10.2289	0.6403	0.5545	4.0464	1.2482	0.8781	0.632	0.9989	1.5593	1.6915	17.4725	0.8736	3.3706	5.5166	7.1089	1.2532	0.6898
TCGA-FG-A4MU	326	0	1	MALE	Oligoastrocytoma	58	Right	G3	WT	non-codel	Methylated	Mutant	WT	NA	NA	NA	NA	1.4736	2.1911	1.7283	0.6533	0.597	0.5877	0.7066	1.0993	0.8992	0.6418	0.6399	3.4918	0.9086	12.2849	0.7694	0.6664	4.8624	1.4999	1.0552	0.7595	1.2003	1.8703	2.0326	0.9868	0.9557	4.0465	6.6231	8.5059	1.5059	0.8289
TCGA-FG-A4MW	559	1	1	MALE	Oligoastrocytoma	63	Right	G3	WT	non-codel	Methylated	Mutant	WT	YES	YES	Non-response	Non-response	1.5039	2.2361	1.7638	0.6667	0.6092	0.6	0.719	1.1212	0.9187	0.655	0.6476	3.5635	0.9272	12.5388	0.7852	0.68	4.9622	1.5307	1.0769	0.7751	1.225	1.8845	2.0743	4.3488	0.0147	3.6454	5.1917	6.5806	1.5368	0.8459
TCGA-FG-A4MX	569	0	1	MALE	Astrocytoma	47	Right	G2	Mutant	non-codel	Methylated	WT	Mutant	NA	YES	Response	Response	1.4015	2.0839	1.6437	0.6214	0.5677	0.5589	0.6719	1.0455	0.8555	0.6104	0.6086	3.3209	0.8641	11.6836	0.7318	0.6337	4.6244	1.4265	1.0036	0.7223	1.1416	1.7644	1.9331	6.8987	0.0551	3.8319	6.1068	8.1064	1.4322	0.7883
TCGA-FG-A4MY	721	0	2	FEMALE	Oligoastrocytoma	44	Right	G2	Mutant	non-codel	Methylated	WT	Mutant	NA	YES	Non-response	Non-response	0.0988	0.0163	2.6108	1.1618	1.0615	1.0354	1.2495	1.9535	1.5662	1.1414	1.1182	0.0015	0.1198	0.0084	1.3667	1.185	8.6469	2.6673	1.8765	1.3506	1.8596	1.46	3.5803	0.1802	0.0269	0.0674	0.1294	0.4889	0.3247	1.452
TCGA-FG-A60J	449	0	2	FEMALE	Oligoastrocytoma	47	Left	G2	Mutant	non-codel	Methylated	Mutant	WT	NA	NA	Response	NA	1.9682	2.889	2.3125	0.8742	0.7988	0.7852	0.9419	1.4706	1.1765	0.8588	0.8563	0.5894	1.2157	0.0969	1.0295	0.8916	6.5061	2.0069	1.4119	1.0162	1.6061	2.2005	2.7197	0.0185	0.0242	5.4022	7.9754	1.8645	2.015	1.1091
TCGA-FG-A60K	542	0	1	FEMALE	Oligoastrocytoma	34	Right	G2	Mutant	codel	Methylated	Mutant	WT	NA	NA	Non-response	Non-response	1.3388	1.9907	1.5702	0.5936	0.5423	0.5333	0.6418	0.9988	0.8186	0.5831	0.5814	3.1724	0.8255	11.1669	0.6991	0.6054	4.4176	1.3627	0.9587	0.69	1.0905	1.7022	1.8466	10.8395	0.0559	3.6797	5.9941	7.7611	1.3681	0.7531
TCGA-FG-A60L	655	0	1	FEMALE	Astrocytoma	34	Left	G2	Mutant	non-codel	Methylated	NA	WT	NA	NA	Response	Response	1.6366	2.4335	1.9195	0.7256	0.663	0.6496	0.78	1.1493	0.9999	0.7128	0.7093	3.878	1.0091	13.5628	0.8546	0.7401	5.4003	1.647	1.172	0.8435	1.3331	1.8941	2.2574	0.307	0.0514	2.0766	2.3113	8.104	1.6725	0.9206
TCGA-FG-A6IZ	457	0	2	MALE	Oligodendroglioma	60	Left	G2	Mutant	codel	Methylated	NA	WT	NA	YES	Response	Response	0.1735	0.0239	2.1757	0.8224	0.7515	0.7396	0.8886	1.3839	1.1056	0.808	0.8056	0.1563	0.0848	0.0058	0.9686	0.8389	6.1211	1.8882	1.3284	0.9561	1.5111	2.3421	2.5587	0.8854	1.2214	5.0018	8.2706	10.5522	1.8957	1.0415
TCGA-FG-A6J1	500	0	2	FEMALE	Oligodendroglioma	44	Left	G2	Mutant	codel	Methylated	NA	WT	NA	YES	Non-response	Non-response	1.7769	2.5976	2.0906	0.7903	0.7221	0.7102	0.8546	1.3298	1.0671	0.7764	0.7741	0.3378	1.099	0.0747	0.9307	0.806	5.8815	1.8143	1.2764	0.9186	1.4519	2.2486	2.4586	0.1776	0.0499	4.8944	8.0044	10.226	1.8215	1.0027
TCGA-FG-A6J3	677	0	1	FEMALE	Astrocytoma	52	Right	G3	Mutant	non-codel	Methylated	NA	WT	YES	YES	Non-response	Non-response	1.375	2.0444	1.6126	0.6096	0.557	0.5487	0.6592	1.0257	0.841	0.5989	0.5971	3.258	0.8478	11.4543	0.7179	0.6217	4.5369	1.3995	0.9846	0.7086	1.12	1.7454	1.8965	8.35	0.1324	3.7791	6.1724	7.9678	1.4051	0.7734
TCGA-FG-A70Y	868	0	1	FEMALE	Oligodendroglioma	20	Left	G2	Mutant	non-codel	Methylated	NA	Mutant	YES	YES	Response	Non-response	2.1237	3.1577	0.0754	0.9415	0.8603	0.8397	1.0089	0.1471	1.297	0.8334	0.9223	5.0322	1.3094	17.6285	1.0599	0.9598	6.9465	2.0265	0.5337	1.094	0.1341	0.5772	0.0053	0.5536	0.0294	0.0108	0.007	0.067	0.0004	1.1946
TCGA-FG-A70Z	328	0	1	FEMALE	Oligoastrocytoma	53	Left	G3	WT	non-codel	Methylated	NA	WT	YES	YES	Non-response	Non-response	1.3023	1.9364	1.5274	0.5774	0.5275	0.5188	0.624	0.9716	0.7963	0.5672	0.5656	3.0859	0.803	10.863	0.68	0.5889	4.2972	1.3256	0.9326	0.6712	1.0608	1.5774	1.7963	18.5629	0.9285	3.5315	5.6472	1.7311	1.3309	0.7326
TCGA-FG-A710	1115	0	1	FEMALE	Oligodendroglioma	50	Left	G2	Mutant	codel	Methylated	NA	WT	YES	NA	Non-response	Non-response	1.3755	2.0452	1.6132	0.6098	0.5572	0.5451	0.6585	1.0261	0.8418	0.5991	0.5973	3.2592	0.8481	11.4731	0.7182	0.622	4.5386	1.4	0.9849	0.7089	1.1204	1.4948	1.8972	19.58	0.4688	0.3104	1.9355	4.3798	1.4042	0.7737
TCGA-FG-A711	1481	1	1	FEMALE	Oligodendroglioma	33	Left	G2	Mutant	non-codel	Unmethylated	NA	Mutant	YES	YES	Non-response	Non-response	1.4359	2.135	1.6841	0.6366	0.5817	0.5717	0.6864	1.0711	0.8722	0.6254	0.6236	3.4024	0.8853	11.9747	0.7497	0.6493	4.738	1.4616	1.0282	0.74	1.1696	1.7565	1.9806	3.6769	1.0529	3.9172	6.4346	8.1624	1.4674	0.8077
TCGA-FG-A713	622	0	1	FEMALE	Oligoastrocytoma	74	Right	G2	Mutant	codel	Methylated	NA	Mutant	NA	NA	Response	Response	1.2257	1.8224	1.4375	0.5434	0.4965	0.4892	0.5877	0.9144	0.7501	0.5338	0.5323	2.9043	0.7557	10.2236	0.64	0.5542	4.0443	1.2476	0.8777	0.6317	0.9984	1.5584	1.6906	17.4838	0.9019	3.3688	5.5173	7.1052	1.2525	0.6894
TCGA-FG-A87N	567	0	1	FEMALE	Astrocytoma	37	Left	G3	Mutant	non-codel	Methylated	NA	WT	YES	YES	Non-response	Non-response	1.2346	1.8357	1.4479	0.5473	0.5001	0.492	0.5919	0.921	0.7555	0.5377	0.5361	2.9253	0.7612	10.2978	0.6446	0.5583	4.0736	1.2566	0.884	0.6363	1.0056	1.5651	1.7029	17.6057	0.9077	3.3923	5.5067	6.4957	1.2616	0.6944
TCGA-FG-A87Q	174	0	1	FEMALE	Astrocytoma	61	Right	G3	WT	non-codel	Methylated	NA	WT	YES	YES	Response	NA	1.2258	1.8227	1.4377	0.5435	0.4966	0.489	0.5877	0.9145	0.7502	0.5339	0.5323	2.9047	0.7558	10.2251	0.6401	0.5543	4.0449	1.2477	0.8778	0.6318	0.9985	1.5569	1.6908	17.4861	0.902	3.3685	5.5091	7.1059	1.2527	0.6895
TCGA-FN-7833	837	0	2	MALE	Oligoastrocytoma	25	Midline	G3	Mutant	non-codel	Methylated	WT	Mutant	YES	YES	Response	Response	0.6955	0.2321	2.5058	0.9472	0.8655	0.8514	1.0204	1.5939	1.2758	0.9306	0.9277	0.0313	1.3113	0.0168	1.1156	0.9661	7.0498	2.1747	1.5299	1.1011	1.7403	2.3879	2.9469	0.0332	0.0269	2.3398	1.9381	8.9516	2.1824	1.2018
TCGA-HT-7467	3	0	1	MALE	Oligodendroglioma	54	Right	G2	Mutant	codel	Methylated	Mutant	WT	NA	NA	Response	Response	1.2262	1.8232	1.4381	0.5436	0.4967	0.4892	0.5879	0.9147	0.7501	0.5341	0.5325	2.9054	0.756	10.2277	0.6402	0.5545	4.0459	1.2481	0.878	0.6319	0.9988	1.5525	1.6913	17.4899	0.9022	3.3627	5.5105	7.1023	1.253	0.6897
TCGA-HT-7468	203	0	1	MALE	Oligodendroglioma	30	Right	G3	Mutant	codel	Methylated	Mutant	WT	YES	NA	Non-response	Non-response	1.3839	2.0577	1.6231	0.6135	0.5606	0.5523	0.6635	1.0324	0.8467	0.6028	0.601	3.2791	0.8533	11.5412	0.7226	0.6258	4.5663	1.4086	0.991	0.7132	1.1272	1.7425	1.9088	7.4743	0.4941	3.802	6.229	7.9283	1.4142	0.7784
TCGA-HT-7469	351	1	1	MALE	Oligodendroglioma	30	Left	G3	WT	non-codel	Methylated	WT	Mutant	YES	YES	Non-response	Non-response	1.235	1.8363	1.4485	0.5475	0.5003	0.4911	0.5917	0.9213	0.7546	0.5379	0.5363	2.9264	0.7615	10.3015	0.6449	0.5585	4.0751	1.2571	0.8844	0.6365	1.006	1.5535	1.7035	17.6103	0.9087	3.3625	5.4801	6.5567	1.2621	0.6947
TCGA-HT-7470	1220	1	1	MALE	Oligodendroglioma	37	Right	G3	Mutant	non-codel	Methylated	WT	Mutant	YES	YES	Non-response	Non-response	1.2268	1.8241	1.4388	0.5439	0.497	0.4895	0.5881	0.9152	0.7507	0.5343	0.5328	2.9069	0.7564	10.2329	0.6406	0.5547	4.0479	1.2487	0.8785	0.6323	0.9993	1.5582	1.6921	17.4139	0.9027	3.3708	5.5223	7.1113	1.2537	0.6901
TCGA-HT-7472	1	0	1	MALE	Oligodendroglioma	38	Right	G2	Mutant	non-codel	Methylated	WT	Mutant	NA	NA	Non-response	Non-response	1.2257	1.8225	1.4376	0.5434	0.4965	0.489	0.5876	0.9144	0.75	0.5339	0.5323	2.9043	0.7557	10.2239	0.64	0.5543	4.0444	1.2476	0.8777	0.6317	0.9984	1.5585	1.6906	17.4837	0.9019	3.3689	5.5175	7.1054	1.2526	0.6895
TCGA-HT-7473	503	0	1	MALE	Oligoastrocytoma	28	Right	G2	Mutant	non-codel	Unmethylated	WT	Mutant	NA	YES	Response	NA	1.2258	1.8227	1.4377	0.5435	0.4966	0.4892	0.5878	0.9145	0.7502	0.5339	0.5323	2.9047	0.7558	10.2251	0.6401	0.5543	4.0449	1.2477	0.8778	0.6318	0.9985	1.5587	1.6908	17.4807	0.902	3.3693	5.5102	7.1062	1.2527	0.6895
TCGA-HT-7474	114	0	1	MALE	Oligoastrocytoma	52	Right	G2	Mutant	non-codel	Methylated	WT	Mutant	NA	NA	Non-response	Non-response	1.2429	1.848	1.4577	0.551	0.5035	0.4954	0.5958	0.9272	0.7606	0.5413	0.5394	2.945	0.7663	10.3671	0.649	0.562	4.101	1.2651	0.89	0.6405	1.0124	1.5767	1.7143	17.1286	0.145	3.413	5.5885	7.2002	1.2701	0.6991
TCGA-HT-7475	530	0	1	MALE	Oligoastrocytoma	67	Right	G3	Mutant	non-codel	Methylated	WT	Mutant	YES	YES	Response	Response	1.3389	1.9908	1.5703	0.5936	0.5424	0.5338	0.642	0.9989	0.8178	0.5832	0.5815	3.1726	0.8255	11.1675	0.6991	0.6055	4.418	1.3628	0.9588	0.69	1.0906	1.7025	1.8468	9.9513	0.9852	3.6801	5.9389	7.7617	1.3683	0.7532
TCGA-HT-7476	199	0	1	MALE	Astrocytoma	26	Left	G2	Mutant	non-codel	Methylated	WT	Mutant	YES	YES	Non-response	NA	1.2263	1.8234	1.4383	0.5437	0.4968	0.4894	0.588	0.9148	0.7504	0.5341	0.5326	2.9058	0.7561	10.229	0.6403	0.5545	4.0464	1.2482	0.8781	0.632	0.9989	1.5591	1.6915	17.4546	0.9022	3.3706	5.5105	7.1053	1.2532	0.6898
TCGA-HT-7477	738	0	1	MALE	Astrocytoma	62	Left	G3	Mutant	non-codel	Methylated	WT	Mutant	YES	YES	Response	Response	1.3943	2.0732	1.6353	0.6182	0.5648	0.5541	0.6676	1.0402	0.852	0.6073	0.6055	3.3039	0.8597	11.6276	0.728	0.6305	4.6008	1.4191	0.9985	0.7186	1.1358	1.7612	1.9232	6.4762	0.9356	3.8323	6.2165	7.9339	1.4249	0.7843
TCGA-HT-7478	194	0	2	MALE	Astrocytoma	36	Left	G2	Mutant	non-codel	Unmethylated	WT	Mutant	NA	YES	Response	Response	0.0656	0.0194	3.1498	1.2295	1.1233	1.0983	1.2669	2.0685	1.6369	1.2079	1.1757	0.0007	0.049	0.0087	1.448	1.2541	9.1509	2.8228	1.9119	1.4293	1.3645	1.5775	0.161	0.008	0.0119	0.0434	0.0383	1.1424	0.0002	1.3646
TCGA-HT-7479	1227	0	1	MALE	Astrocytoma	44	Right	G3	Mutant	non-codel	Methylated	Mutant	WT	YES	NA	Response	Response	1.416	2.1054	1.6607	0.6278	0.5736	0.5646	0.6786	1.0563	0.8652	0.6167	0.6139	3.3552	0.8731	11.8106	0.7393	0.6403	4.6722	1.4413	1.014	0.7298	1.1534	1.7924	1.9531	5.5403	0.3158	3.8884	6.3623	8.1051	1.447	0.7965
TCGA-HT-7480	2287	0	1	MALE	Oligodendroglioma	33	Right	G2	Mutant	codel	Methylated	Mutant	WT	YES	YES	Non-response	Non-response	1.2356	1.8372	1.4492	0.5478	0.5005	0.493	0.5924	0.9218	0.756	0.5382	0.5366	2.9278	0.7618	10.3065	0.6452	0.5587	4.0771	1.2577	0.8848	0.6368	1.0065	1.5703	1.7043	16.9141	0.8199	3.3961	5.5537	7.1624	1.2627	0.695
TCGA-HT-7481	2918	0	1	MALE	Oligodendroglioma	39	Right	G2	Mutant	codel	Methylated	Mutant	WT	NA	YES	Response	Response	1.2321	1.8321	1.4451	0.5463	0.4991	0.4915	0.5908	0.9192	0.7537	0.5367	0.535	2.9196	0.7597	10.2775	0.6433	0.5572	4.0656	1.2541	0.8823	0.635	1.0036	1.5667	1.6995	17.0671	0.9045	3.3866	5.5366	7.1426	1.2591	0.6931
TCGA-HT-7482	3253	0	1	FEMALE	Oligoastrocytoma	18	Left	G2	Mutant	non-codel	Methylated	WT	Mutant	YES	YES	Response	Response	1.2264	1.8236	1.4384	0.5437	0.4968	0.4895	0.588	0.9149	0.7506	0.5342	0.5326	2.9061	0.7562	10.2299	0.6404	0.5546	4.0468	1.2483	0.8782	0.6321	0.999	1.5476	1.6916	17.4761	0.9018	3.3709	5.5092	7.0945	1.2533	0.6899
TCGA-HT-7483	5255	0	1	MALE	Oligoastrocytoma	14	Right	G2	Mutant	non-codel	Unmethylated	WT	Mutant	YES	YES	Response	Response	1.2268	1.8242	1.4389	0.5439	0.497	0.4894	0.5881	0.9152	0.7508	0.5344	0.5328	2.907	0.7564	10.2332	0.6406	0.5548	4.0481	1.2487	0.8785	0.6323	0.9993	1.5569	1.6922	17.4687	0.8622	3.3651	5.516	7.1108	1.2537	0.6901
TCGA-HT-7485	122	0	1	MALE	Astrocytoma	42	Right	G2	Mutant	non-codel	Methylated	WT	Mutant	NA	NA	Response	Response	1.2842	1.9095	1.5062	0.5694	0.5202	0.5116	0.6134	0.9578	0.7859	0.5593	0.5562	3.043	0.7918	10.7118	0.6705	0.5807	4.2374	1.3071	0.9196	0.6618	1.0461	1.5807	1.7713	17.7196	0.4537	3.4184	5.6529	4.0896	1.3123	0.7224
TCGA-HT-7601	153	0	1	FEMALE	Astrocytoma	30	Left	G3	Mutant	non-codel	Methylated	WT	WT	YES	YES	Response	NA	1.2955	1.9263	1.5194	0.5744	0.5248	0.517	0.6211	0.9665	0.7922	0.5643	0.5626	3.0697	0.7988	10.8048	0.6764	0.5858	4.2746	1.3186	0.9277	0.6677	1.0552	1.6445	1.7869	13.527	0.2298	3.5607	5.8198	7.5065	1.3239	0.7287
TCGA-HT-7602	908	0	1	MALE	Oligodendroglioma	21	Right	G2	Mutant	non-codel	Methylated	WT	WT	NA	NA	NA	NA	1.2404	1.8444	1.4548	0.5499	0.5025	0.4948	0.5936	0.9253	0.7591	0.5403	0.5386	2.9392	0.7648	10.3467	0.6477	0.5609	4.093	1.2626	0.8882	0.6393	1.0104	1.5586	1.7109	17.6235	0.9127	3.3762	5.5786	6.1262	1.2676	0.6977
TCGA-HT-7603	705	0	1	MALE	Oligodendroglioma	29	NA	G2	Mutant	non-codel	Methylated	WT	Mutant	NA	YES	Response	NA	1.2261	1.8232	1.4381	0.5436	0.4967	0.4887	0.5879	0.9147	0.7503	0.5341	0.5324	2.9054	0.756	10.2276	0.6402	0.5545	4.0458	1.2481	0.878	0.6319	0.9988	1.5591	1.6912	17.4767	0.8862	3.3701	5.5137	7.108	1.253	0.6897
TCGA-HT-7604	3725	0	1	MALE	Astrocytoma	50	Left	G2	Mutant	non-codel	Methylated	WT	Mutant	YES	YES	Response	Response	1.5061	2.2394	1.7664	0.6677	0.6101	0.6005	0.7216	1.1236	0.9204	0.656	0.654	3.5687	0.9286	12.1303	0.7864	0.681	4.9696	1.533	1.0785	0.7762	1.2268	1.8933	2.0774	0.2277	0.125	4.1361	6.7174	8.6673	1.5391	0.8472
TCGA-HT-7605	139	0	1	MALE	Oligodendroglioma	38	Right	G2	Mutant	codel	Methylated	Mutant	WT	NA	NA	NA	NA	1.2898	1.9178	1.5127	0.5718	0.5225	0.5146	0.6175	0.9622	0.7892	0.5618	0.5595	3.0562	0.7953	10.7586	0.6735	0.5832	4.2559	1.3129	0.9236	0.6647	1.0506	1.6314	1.7791	13.9876	0.1665	3.5418	5.7932	7.4702	1.3181	0.7255
TCGA-HT-7606	526	0	1	FEMALE	Astrocytoma	30	Left	G2	Mutant	non-codel	Unmethylated	WT	WT	YES	YES	Response	NA	1.2259	1.8227	1.4377	0.5435	0.4966	0.489	0.5878	0.9145	0.7502	0.5339	0.5324	2.9047	0.7558	10.2251	0.6401	0.5543	4.0449	1.2478	0.8778	0.6318	0.9985	1.5587	1.6908	17.4729	0.9019	3.3693	5.5163	7.1063	1.2527	0.6896
TCGA-HT-7607	96	1	1	FEMALE	Astrocytoma	61	Left	G2	Mutant	codel	Methylated	Mutant	WT	NA	NA	Non-response	Non-response	1.2258	1.8226	1.4377	0.5435	0.4966	0.4893	0.5877	0.9145	0.7502	0.5339	0.5323	2.9045	0.7558	10.2245	0.64	0.5543	4.0447	1.2477	0.8778	0.6317	0.9985	1.5586	1.6907	17.4758	0.9011	3.3691	5.5178	7.1059	1.2526	0.6895
TCGA-HT-7608	671	0	1	MALE	Oligoastrocytoma	61	Right	G2	Mutant	codel	Methylated	Mutant	WT	NA	NA	Non-response	Non-response	1.2257	1.8225	1.4375	0.5434	0.4965	0.4892	0.5877	0.9144	0.7501	0.5339	0.5323	2.9043	0.7557	10.2236	0.64	0.5542	4.0443	1.2476	0.8777	0.6317	0.9984	1.5576	1.6906	17.4839	0.9019	3.3688	5.5173	7.1052	1.2525	0.6894
TCGA-HT-7609	1399	0	1	MALE	Oligoastrocytoma	34	Right	G3	Mutant	non-codel	Methylated	WT	WT	YES	YES	Non-response	Non-response	1.2259	1.8228	1.4378	0.5435	0.4966	0.4888	0.5878	0.9145	0.7502	0.5339	0.5324	2.9048	0.7559	10.2254	0.6401	0.5543	4.045	1.2478	0.8778	0.6318	0.9985	1.5531	1.6909	17.4794	0.9016	3.3692	5.5165	7.1064	1.2527	0.6896
TCGA-HT-7610	1706	0	1	FEMALE	Oligoastrocytoma	25	Left	G2	Mutant	non-codel	Methylated	WT	Mutant	NA	NA	Non-response	Non-response	1.3545	2.014	1.5886	0.6005	0.5487	0.5406	0.6494	1.0105	0.8284	0.59	0.5879	3.2096	0.8352	11.2971	0.7072	0.6125	4.4694	1.3787	0.9699	0.6981	1.1033	1.7188	1.8683	9.6169	0.2515	3.723	6.0715	7.8247	1.3842	0.7619
TCGA-HT-7611	1752	0	1	MALE	Oligoastrocytoma	36	Right	G2	Mutant	non-codel	Methylated	WT	Mutant	NA	NA	NA	NA	1.2257	1.8225	1.4376	0.5434	0.4965	0.4887	0.5877	0.9144	0.7501	0.5339	0.5323	2.9044	0.7558	10.224	0.64	0.5543	4.0444	1.2476	0.8777	0.6317	0.9984	1.5579	1.6907	17.4839	0.9019	3.369	5.5168	7.1041	1.2526	0.6895
TCGA-HT-7616	7	1	1	MALE	Oligodendroglioma	75	Right	G3	Mutant	codel	Methylated	Mutant	WT	NA	NA	Non-response	Non-response	1.3684	2.0346	1.6049	0.6067	0.5543	0.5459	0.6561	1.0208	0.8368	0.596	0.5942	3.2424	0.8437	11.4124	0.7145	0.6188	4.5152	1.3928	0.9799	0.7052	1.1146	1.7341	1.8874	8.2379	0.7275	3.7578	6.1437	7.8816	1.3984	0.7697
TCGA-HT-7620	434	0	1	MALE	Oligodendroglioma	40	Left	G3	Mutant	codel	Methylated	Mutant	WT	YES	YES	Response	Non-response	1.2299	1.8288	1.4425	0.5453	0.4982	0.4909	0.5897	0.9176	0.7527	0.5357	0.5341	2.9144	0.7584	10.2593	0.6422	0.5562	4.0584	1.2519	0.8807	0.6339	1.0019	1.5585	1.6965	17.2819	0.8995	3.3682	5.5247	7.0825	1.2569	0.6919
TCGA-HT-7676	5	0	1	MALE	Oligodendroglioma	26	Left	G2	Mutant	non-codel	Unmethylated	WT	Mutant	NA	NA	NA	NA	1.8713	2.7825	2.1948	0.8297	0.7581	0.7378	0.8892	1.3779	1.1443	0.8151	0.8126	4.4342	1.1538	15.4723	0.9771	0.8459	6.1742	1.9048	1.34	0.9645	0.91	1.3023	2.0878	0.7101	0.0053	0.0796	0.083	3.7682	0.0007	1.0526
TCGA-HT-7677	494	0	1	MALE	Oligodendroglioma	53	Left	G3	Mutant	codel	Methylated	Mutant	WT	YES	YES	Non-response	Non-response	1.2257	1.8225	1.4375	0.5434	0.4965	0.4892	0.5877	0.9144	0.75	0.5339	0.5323	2.9043	0.7557	10.2237	0.64	0.5542	4.0443	1.2476	0.8777	0.6317	0.9984	1.5585	1.6906	17.4819	0.9019	3.3689	5.5173	7.1053	1.2525	0.6895
TCGA-HT-7680	23	0	1	FEMALE	Astrocytoma	32	Midline	G2	WT	non-codel	Unmethylated	WT	WT	NA	NA	Non-response	Non-response	1.2332	1.8337	1.4464	0.5467	0.4996	0.4918	0.5913	0.92	0.7546	0.5371	0.5355	2.9221	0.7604	10.2865	0.6439	0.5577	4.0692	1.2552	0.8831	0.6356	1.0045	1.5674	1.701	17.5575	0.3639	3.3891	5.5271	7.1489	1.2602	0.6937
TCGA-HT-7681	1359	0	1	FEMALE	Oligoastrocytoma	29	Right	G2	Mutant	codel	Methylated	Mutant	WT	NA	NA	Response	Response	1.2263	1.8234	1.4382	0.5437	0.4968	0.4894	0.588	0.9148	0.7495	0.5341	0.5325	2.9057	0.7561	10.2287	0.6403	0.5545	4.0463	1.2482	0.8781	0.632	0.9989	1.5593	1.6914	17.4431	0.9023	3.3705	5.5201	7.1088	1.2531	0.6898
TCGA-HT-7684	184	0	1	MALE	Oligoastrocytoma	58	Left	G3	Mutant	non-codel	Methylated	Mutant	WT	NA	NA	Response	Response	1.2257	1.8225	1.4375	0.5434	0.4965	0.4891	0.5877	0.9144	0.7501	0.5339	0.5323	2.9043	0.7557	10.2236	0.64	0.5542	4.0443	1.2476	0.8777	0.6317	0.9984	1.5585	1.6906	17.4836	0.9019	3.3688	5.5159	7.1052	1.2525	0.6895
TCGA-HT-7686	1300	0	1	FEMALE	Astrocytoma	29	Left	G3	Mutant	non-codel	Methylated	WT	Mutant	YES	YES	Response	Response	1.2328	1.833	1.4459	0.5466	0.4994	0.4913	0.589	0.9196	0.7544	0.5369	0.5345	2.9211	0.7601	10.2829	0.6437	0.5575	4.0677	1.2548	0.8828	0.6353	1.0042	1.5633	1.7004	17.5838	0.9071	2.8337	5.5482	7.141	1.2598	0.6934
TCGA-HT-7687	3	0	1	MALE	Oligodendroglioma	74	Right	G3	Mutant	codel	Methylated	Mutant	WT	NA	NA	Non-response	NA	1.2257	1.8225	1.4375	0.5434	0.4965	0.4892	0.5877	0.9144	0.7501	0.5339	0.5323	2.9043	0.7557	10.2236	0.64	0.5542	4.0443	1.2476	0.8777	0.6317	0.9984	1.5585	1.6906	17.4829	0.9018	3.3688	5.5173	7.1052	1.2525	0.6894
TCGA-HT-7688	964	0	1	MALE	Oligodendroglioma	59	Left	G3	Mutant	non-codel	Methylated	WT	Mutant	YES	YES	Response	Response	1.2265	1.8237	1.4385	0.5438	0.4969	0.4894	0.5881	0.915	0.7499	0.5342	0.5326	2.9062	0.7562	10.2306	0.6404	0.5546	4.047	1.2484	0.8783	0.6321	0.9991	1.5595	1.6917	17.4272	0.9025	3.3711	5.5211	7.11	1.2534	0.6899
TCGA-HT-7689	455	0	1	FEMALE	Oligodendroglioma	58	Left	G2	Mutant	non-codel	Methylated	WT	Mutant	YES	YES	Response	NA	1.2264	1.8235	1.4384	0.5437	0.4968	0.489	0.5879	0.9149	0.7505	0.5342	0.5326	2.906	0.7562	10.2296	0.6403	0.5546	4.0466	1.2483	0.8782	0.6321	0.999	1.5586	1.6916	17.4647	0.9024	3.3548	5.5159	7.104	1.2533	0.6899
TCGA-HT-7690	3	0	1	MALE	Oligoastrocytoma	29	Right	G3	Mutant	non-codel	Methylated	WT	Mutant	NA	NA	NA	NA	1.2289	1.8272	1.4413	0.5448	0.4978	0.4902	0.5892	0.9167	0.752	0.5352	0.5337	2.9118	0.7577	10.2502	0.6416	0.5557	4.0548	1.2508	0.88	0.6333	1.001	1.5625	1.695	17.4491	0.7376	3.3776	5.5237	7.1201	1.2558	0.6912
TCGA-HT-7691	3	0	1	FEMALE	Astrocytoma	31	Right	G2	WT	non-codel	Unmethylated	WT	WT	NA	NA	NA	NA	1.232	1.8319	1.4449	0.5462	0.4991	0.4918	0.5907	0.9191	0.7537	0.5366	0.535	2.9193	0.7596	10.2764	0.6433	0.5571	4.0652	1.254	0.8822	0.6349	1.0035	1.5665	1.6993	17.0622	0.9054	3.3862	5.5447	7.1419	1.259	0.693
TCGA-HT-7692	90	0	1	MALE	Oligoastrocytoma	43	Left	G2	Mutant	codel	Methylated	Mutant	WT	NA	YES	Response	NA	1.4747	2.1927	1.7296	0.6538	0.5974	0.5878	0.7066	1.1001	0.9021	0.6423	0.6394	3.4943	0.9093	12.2917	0.77	0.6668	4.866	1.501	1.056	0.76	1.2012	1.7612	2.0341	2.5069	0.0186	4.0421	6.4257	8.1933	1.507	0.8295
TCGA-HT-7693	533	0	1	FEMALE	Oligodendroglioma	51	Right	G2	Mutant	non-codel	Methylated	WT	Mutant	YES	YES	Response	NA	1.4672	2.1816	1.7208	0.6505	0.5943	0.5852	0.7035	1.0945	0.8975	0.639	0.6372	3.4765	0.9046	12.2273	0.7661	0.6635	4.8412	1.4934	1.0506	0.7561	1.1951	1.8638	2.0237	2.2528	0.0786	4.0325	6.6044	8.4975	1.4993	0.8253
TCGA-HT-7694	210	0	1	MALE	Oligodendroglioma	60	Right	G3	Mutant	codel	Methylated	Mutant	WT	NA	YES	Response	NA	1.226	1.8229	1.4379	0.5435	0.4966	0.4893	0.5878	0.9146	0.7502	0.534	0.5324	2.9049	0.7559	10.2259	0.6401	0.5544	4.0452	1.2479	0.8779	0.6318	0.9986	1.5588	1.691	17.4639	0.9019	3.3696	5.5186	7.1068	1.2528	0.6896
TCGA-HT-7695	442	0	1	FEMALE	Oligodendroglioma	29	Left	G2	Mutant	codel	Methylated	Mutant	WT	YES	YES	Response	NA	1.4631	2.1755	1.716	0.6487	0.5927	0.5836	0.7014	1.0915	0.8951	0.6373	0.6354	3.4669	0.9021	12.2036	0.7639	0.6616	4.8277	1.4892	1.0477	0.754	1.1918	1.848	2.0181	2.7506	0.0386	3.9543	6.5702	8.4683	1.4951	0.823
TCGA-HT-7854	1201	0	1	MALE	Astrocytoma	62	Left	G2	WT	non-codel	Unmethylated	Mutant	WT	NA	YES	Non-response	Non-response	1.386	2.0608	1.6256	0.6145	0.5615	0.553	0.6645	1.034	0.8472	0.6037	0.6019	3.2842	0.8546	11.5605	0.7237	0.6267	4.5733	1.4108	0.9925	0.7143	1.129	1.7604	1.9117	7.3225	0.4256	3.8069	6.2341	8.0265	1.4164	0.7796
TCGA-HT-7855	585	0	1	MALE	Astrocytoma	39	Left	G3	Mutant	non-codel	Methylated	WT	Mutant	YES	YES	Response	Response	1.2689	1.8867	1.4882	0.5626	0.514	0.5061	0.6084	0.9466	0.7763	0.5527	0.551	3.0067	0.7824	10.5841	0.6625	0.5738	4.1869	1.2916	0.9086	0.654	1.0336	1.5792	1.7502	15.6957	0.274	3.4875	5.6323	7.0153	1.2967	0.7138
TCGA-HT-7856	1189	0	1	MALE	Oligodendroglioma	35	Left	G3	Mutant	codel	Methylated	Mutant	WT	YES	YES	Response	Response	1.2257	1.8225	1.4375	0.5434	0.4965	0.4892	0.5877	0.9144	0.7501	0.5339	0.5323	2.9043	0.7557	10.2238	0.64	0.5543	4.0443	1.2476	0.8777	0.6317	0.9984	1.5585	1.6906	17.4813	0.9019	3.3689	5.5174	7.1053	1.2525	0.6895
TCGA-HT-7857	7	0	1	FEMALE	Astrocytoma	24	Left	G3	WT	non-codel	Unmethylated	WT	Mutant	NA	NA	NA	NA	1.2578	1.8702	1.4752	0.5576	0.5095	0.5012	0.6031	0.9383	0.7692	0.5478	0.5453	2.9804	0.7755	10.4916	0.6568	0.5688	4.1503	1.2803	0.9007	0.6482	1.0245	1.5447	1.7349	17.8571	0.1807	3.4562	5.6594	5.617	1.2854	0.7075
TCGA-HT-7858	1540	0	1	MALE	Astrocytoma	28	Right	G2	Mutant	non-codel	Methylated	WT	Mutant	NA	YES	Response	Response	1.2258	1.8226	1.4377	0.5435	0.4966	0.4891	0.5877	0.9145	0.7501	0.5339	0.5323	2.9046	0.7558	10.2246	0.64	0.5543	4.0447	1.2477	0.8778	0.6317	0.9985	1.5584	1.6908	17.4817	0.9016	3.3692	5.5136	7.1056	1.2526	0.6895
TCGA-HT-7860	15	0	1	FEMALE	Astrocytoma	60	Left	G3	WT	non-codel	Methylated	Mutant	WT	NA	NA	NA	NA	1.2404	1.8443	1.4548	0.5499	0.5025	0.4946	0.5947	0.9253	0.7587	0.5403	0.5387	2.9391	0.7648	10.3463	0.6477	0.5609	4.0928	1.2625	0.8882	0.6393	1.0104	1.5709	1.7109	17.652	0.1272	3.4053	5.5734	6.8475	1.2676	0.6977
TCGA-HT-7873	718	0	1	MALE	Oligoastrocytoma	29	Right	G2	Mutant	non-codel	Methylated	WT	Mutant	NA	YES	Non-response	Non-response	1.5204	2.2606	1.7831	0.6741	0.6158	0.6062	0.7289	1.1342	0.927	0.6622	0.6602	3.6025	0.9374	12.6781	0.7938	0.6875	5.0166	1.5475	1.0887	0.7836	1.2384	1.874	2.0971	2.5022	0.0109	3.8724	6.5655	5.7238	1.5537	0.8552
TCGA-HT-7874	1130	0	1	FEMALE	Oligodendroglioma	41	Right	G3	Mutant	codel	Methylated	Mutant	WT	YES	YES	Response	Response	1.2307	1.8299	1.4434	0.5456	0.4985	0.4911	0.5901	0.9181	0.752	0.536	0.5344	2.9161	0.7588	10.2652	0.6426	0.5565	4.0607	1.2526	0.8813	0.6343	1.0024	1.5648	1.6975	17.1586	0.8955	3.3825	5.5398	7.1341	1.2576	0.6923
TCGA-HT-7875	10	0	1	MALE	Oligodendroglioma	56	Left	G2	Mutant	codel	Methylated	Mutant	WT	NA	NA	Non-response	Non-response	1.451	2.1576	1.7019	0.6433	0.5878	0.5783	0.6938	1.0825	0.8853	0.632	0.63	3.4383	0.8947	12.0904	0.7577	0.6562	4.7879	1.477	1.0391	0.7478	1.182	1.8394	2.0015	2.4286	1.0634	3.9865	6.5148	8.3599	1.4828	0.8162
TCGA-HT-7877	4	0	1	FEMALE	Oligodendroglioma	20	Left	G2	Mutant	codel	Methylated	Mutant	WT	NA	NA	NA	NA	1.2275	1.8252	1.4397	0.5442	0.4973	0.4898	0.5885	0.9158	0.7512	0.5347	0.5331	2.9087	0.7569	10.2391	0.6409	0.5551	4.0504	1.2495	0.879	0.6326	0.9999	1.5608	1.6931	17.4672	0.8266	3.3738	5.5069	7.116	1.2544	0.6905
TCGA-HT-7879	112	0	1	MALE	Oligoastrocytoma	31	Right	G3	Mutant	non-codel	Methylated	WT	Mutant	YES	YES	Response	NA	1.2391	1.8424	1.4532	0.5493	0.5019	0.4944	0.594	0.9244	0.7582	0.5397	0.5381	2.936	0.764	10.3354	0.647	0.5603	4.0885	1.2612	0.8873	0.6386	1.0093	1.5695	1.7091	17.4704	0.0545	3.4015	5.5657	7.1753	1.2662	0.697
TCGA-HT-7880	162	0	1	MALE	Oligoastrocytoma	30	Right	G2	Mutant	non-codel	Methylated	WT	Mutant	NA	NA	NA	NA	1.4296	2.1257	1.6767	0.6338	0.5791	0.5706	0.6854	1.0665	0.8742	0.6227	0.6208	3.3876	0.8815	11.8969	0.7465	0.6465	4.7173	1.4552	1.0237	0.7368	1.1645	1.7703	1.9719	5.4116	0.013	3.8893	6.1348	8.1046	1.461	0.8042
TCGA-HT-7881	1079	0	1	MALE	Oligodendroglioma	38	Left	G2	Mutant	codel	Methylated	Mutant	WT	NA	YES	Response	Response	1.2771	1.8989	1.4979	0.5662	0.5174	0.5096	0.6123	0.9527	0.7812	0.5563	0.5546	3.0262	0.7874	10.6527	0.6668	0.5775	4.214	1.2999	0.9145	0.6582	1.0403	1.6221	1.7615	14.7458	0.2694	3.5102	5.6983	7.4027	1.3051	0.7184
TCGA-HT-7882	113	1	1	MALE	Oligodendroglioma	66	Left	G3	WT	non-codel	Methylated	Mutant	WT	NA	NA	Non-response	Non-response	1.2265	1.8237	1.4385	0.5438	0.4969	0.4894	0.5881	0.915	0.7497	0.5342	0.5326	2.9062	0.7562	10.2306	0.6404	0.5546	4.047	1.2484	0.8783	0.6321	0.9991	1.5595	1.6917	17.434	0.9021	3.3711	5.5153	7.1101	1.2534	0.6899
TCGA-HT-7884	343	0	2	FEMALE	Astrocytoma	44	Left	G2	Mutant	non-codel	Methylated	WT	Mutant	YES	YES	Non-response	Non-response	0.0377	0.0138	1.3455	1.2944	1.1798	1.1579	1.3426	2.1762	1.7142	1.2717	1.1175	0.0011	0.0683	0.0085	1.5246	1.3203	9.6343	2.972	2.0897	1.5048	2.2858	0.6958	1.4531	0.0086	0.0093	0.155	0.0613	0.2057	0.0063	1.2299
TCGA-HT-7902	956	0	1	FEMALE	Oligoastrocytoma	30	Right	G2	Mutant	non-codel	Methylated	WT	Mutant	NA	NA	Non-response	Non-response	1.2401	1.8439	1.4545	0.5498	0.5024	0.4938	0.5931	0.9251	0.7588	0.5401	0.5377	2.9385	0.7646	10.3441	0.6475	0.5608	4.092	1.2623	0.888	0.6391	1.0101	1.5345	1.7105	17.6413	0.9124	3.2298	5.5377	6.3644	1.2673	0.6976
TCGA-HT-8010	50	0	1	FEMALE	Oligodendroglioma	64	Right	G2	Mutant	codel	Methylated	WT	WT	NA	NA	Non-response	Non-response	1.2492	1.8574	1.4651	0.5538	0.506	0.498	0.5989	0.9319	0.7644	0.5441	0.5423	2.96	0.7702	10.4197	0.6523	0.5649	4.1219	1.2712	0.8945	0.6438	1.0175	1.583	1.723	15.9752	0.9072	3.4332	5.6078	7.2115	1.2766	0.7027
TCGA-HT-8011	494	0	1	MALE	Astrocytoma	55	Right	G3	WT	non-codel	Unmethylated	Mutant	WT	YES	YES	Non-response	Non-response	1.6815	2.5002	1.9719	0.7455	0.6812	0.6705	0.8046	1.2544	1.0281	0.7324	0.7302	3.9843	1.0367	14.0254	0.878	0.7603	5.5482	1.7115	1.2041	0.8666	1.3696	1.695	2.2885	8.1443	0.0373	1.3266	0.1545	1.7455	0.7843	0.9458
TCGA-HT-8012	286	0	1	FEMALE	Oligodendroglioma	30	Right	G2	Mutant	codel	Methylated	Mutant	WT	NA	NA	Non-response	Non-response	1.2258	1.8226	1.4376	0.5434	0.4966	0.4883	0.5877	0.9145	0.7477	0.5339	0.5323	2.9045	0.7558	10.2245	0.64	0.5543	4.0446	1.2477	0.8778	0.6317	0.9985	1.5578	1.6907	17.4855	0.902	3.3655	5.5174	7.1058	1.2526	0.6895
TCGA-HT-8013	1933	1	1	FEMALE	Oligoastrocytoma	37	Left	G2	Mutant	non-codel	Methylated	WT	Mutant	YES	YES	Non-response	NA	1.3723	2.0404	1.6095	0.6084	0.5559	0.5473	0.6562	1.0236	0.8388	0.5977	0.5959	3.2516	0.8461	11.4456	0.7165	0.6205	4.528	1.3968	0.9827	0.7072	1.1178	1.7144	1.8928	9.1701	0.0443	3.6525	5.9348	7.7774	1.4023	0.7719
TCGA-HT-8015	3	0	1	MALE	Astrocytoma	21	Left	G2	WT	non-codel	Unmethylated	WT	WT	NA	NA	NA	NA	1.2898	1.9178	1.5127	0.5718	0.5224	0.5144	0.6184	0.9622	0.7862	0.5618	0.56	3.0562	0.7952	10.7379	0.6734	0.5832	4.2558	1.3128	0.9236	0.6647	1.0506	1.6395	1.779	13.8577	0.5776	3.4884	5.8059	7.4398	1.318	0.7255
TCGA-HT-8018	1152	1	1	FEMALE	Oligoastrocytoma	40	Left	G2	Mutant	non-codel	Methylated	WT	WT	NA	NA	Response	Non-response	1.2806	1.9041	1.5019	0.5677	0.5188	0.51	0.6128	0.8608	0.7834	0.5578	0.5559	3.0344	0.7896	10.6816	0.6686	0.5791	4.2254	1.303	0.917	0.66	1.0431	1.5454	1.7663	18.0072	0.0136	3.5117	4.8935	5.2157	1.3086	0.7203
TCGA-HT-8019	1004	0	1	FEMALE	Oligodendroglioma	34	Right	G3	WT	non-codel	Unmethylated	WT	WT	NA	NA	Response	Response	1.4648	2.178	1.7179	0.6494	0.5934	0.5841	0.7023	1.0927	0.8956	0.638	0.6353	3.4708	0.9031	12.2149	0.7648	0.6624	4.8332	1.4909	1.0489	0.7549	1.1931	1.8623	2.0204	2.8572	0.0172	4.0259	6.1989	8.4913	1.4969	0.8239
TCGA-HT-8104	372	0	1	FEMALE	Astrocytoma	51	Left	G3	WT	non-codel	Unmethylated	Mutant	WT	NA	YES	NA	NA	1.2265	1.8237	1.4385	0.5438	0.4969	0.4887	0.5881	0.915	0.7505	0.5342	0.5326	2.9063	0.7562	10.2306	0.6404	0.5546	4.047	1.2484	0.8783	0.6321	0.9991	1.5595	1.6917	17.4539	0.9025	3.3711	5.5056	7.1097	1.2534	0.6899
TCGA-HT-8105	190	0	1	MALE	Oligodendroglioma	54	Right	G3	Mutant	codel	Methylated	Mutant	WT	NA	YES	Non-response	Non-response	1.2481	1.8558	1.4638	0.5533	0.5056	0.4976	0.5984	0.9311	0.7635	0.5436	0.542	2.9574	0.7696	10.4107	0.6517	0.5644	4.1183	1.2704	0.8937	0.6432	1.0167	1.57	1.7215	17.4274	0.0144	3.4294	5.6095	6.7172	1.2754	0.7021
TCGA-HT-8106	3	0	1	MALE	Astrocytoma	53	Midline	G3	Mutant	non-codel	Methylated	WT	WT	NA	NA	Non-response	Non-response	1.51	2.2452	1.771	0.6695	0.6117	0.602	0.7238	1.1265	0.9233	0.6577	0.6553	3.578	0.931	12.5639	0.7884	0.6828	4.9825	1.5369	1.0813	0.7782	1.23	1.9105	2.0804	2.5301	0.015	4.1143	4.9458	8.7535	0.4445	0.8494
TCGA-HT-8107	14	0	1	MALE	Oligodendroglioma	62	Left	G2	WT	non-codel	Methylated	WT	WT	NA	NA	Non-response	Non-response	1.2743	1.8948	1.4946	0.565	0.5162	0.5075	0.6063	0.9507	0.7798	0.5551	0.5534	3.0196	0.7857	10.6297	0.6654	0.5763	4.2049	1.2971	0.9125	0.6568	1.038	1.5946	1.7577	17.418	0.0488	3.487	5.6121	5.2489	1.3023	0.7168
TCGA-HT-8108	76	0	1	FEMALE	Oligodendroglioma	26	Left	G2	Mutant	non-codel	Methylated	WT	Mutant	NA	NA	Non-response	Non-response	1.4647	2.1779	1.7179	0.6494	0.5934	0.5835	0.6957	1.0927	0.8955	0.638	0.6361	3.4708	0.9031	12.1838	0.7648	0.6623	4.8331	1.4909	1.0489	0.7549	1.1931	1.8598	2.0203	2.6207	0.127	4.0179	6.5107	8.371	1.4968	0.8239
TCGA-HT-8109	169	0	1	MALE	Oligodendroglioma	64	Right	G3	Mutant	codel	Methylated	Mutant	WT	NA	NA	NA	NA	1.4239	2.1173	1.6701	0.6313	0.5767	0.5675	0.6827	1.0623	0.8693	0.6202	0.6184	3.3741	0.878	11.8687	0.7435	0.6439	4.6985	1.4494	1.0197	0.7339	1.1599	1.8034	1.9641	4.6956	0.6241	3.9137	6.4098	8.1482	1.4551	0.801
TCGA-HT-8110	419	0	1	MALE	Astrocytoma	57	Right	G3	WT	non-codel	Methylated	Mutant	WT	NA	YES	Response	Response	1.4553	2.1639	1.7069	0.6452	0.5895	0.5796	0.6978	1.0856	0.8896	0.6339	0.632	3.4484	0.8973	12.1067	0.7599	0.6581	4.802	1.4813	1.0421	0.75	1.1854	1.7907	2.0073	5.0386	0.0164	3.4703	6.4538	7.2075	1.4872	0.8186
TCGA-HT-8111	7	0	1	MALE	Oligoastrocytoma	32	Left	G3	Mutant	non-codel	Methylated	WT	WT	NA	NA	NA	NA	1.482	2.2036	1.7381	0.657	0.6003	0.5911	0.7105	1.1056	0.9065	0.6455	0.6436	3.5116	0.9138	12.359	0.7738	0.6701	4.89	1.5085	1.0612	0.7638	1.2072	1.8762	2.0441	1.0681	0.2793	4.0704	6.6685	8.5911	1.5145	0.8336
TCGA-HT-8113	900	0	1	FEMALE	Oligodendroglioma	49	Left	G2	Mutant	non-codel	Methylated	Mutant	WT	YES	YES	Response	NA	1.4998	2.2301	1.7591	0.6649	0.6076	0.5981	0.7171	1.1189	0.9168	0.6533	0.6513	3.5539	0.9248	12.4932	0.7831	0.6782	4.9489	1.5266	1.074	0.773	1.2217	1.8952	2.0687	4.6071	0.0097	2.7531	3.7232	8.6549	1.5327	0.8437
TCGA-HT-8114	1040	0	1	MALE	Oligoastrocytoma	36	Left	G3	Mutant	non-codel	Methylated	WT	Mutant	YES	YES	Response	Response	1.4461	2.1502	1.696	0.6411	0.5858	0.5765	0.6932	1.0788	0.8844	0.6299	0.6112	3.4265	0.8916	12.0604	0.7551	0.6539	4.7716	1.4719	1.0355	0.7453	1.1779	1.8232	1.9946	3.904	0.167	3.9589	6.4472	8.1593	1.4778	0.8134
TCGA-HT-8558	418	0	1	FEMALE	Oligodendroglioma	29	Left	G2	WT	non-codel	Unmethylated	WT	WT	NA	NA	Response	Response	1.4625	2.1746	1.7153	0.6484	0.5923	0.5831	0.7003	1.0911	0.8936	0.637	0.6186	3.4655	0.9018	12.1972	0.7637	0.6614	4.8258	1.4887	1.0473	0.7538	1.1913	1.821	2.0173	5.9127	0.0297	3.7737	6.41	5.6556	1.4946	0.8227
TCGA-HT-8563	860	0	1	FEMALE	Astrocytoma	30	Right	G3	Mutant	non-codel	Unmethylated	WT	Mutant	NA	NA	Response	Response	1.3221	1.9658	1.5506	0.5861	0.5356	0.5266	0.6337	0.9863	0.8083	0.5758	0.5734	3.1327	0.8152	11.0264	0.6903	0.5978	4.3623	1.3457	0.9467	0.6814	1.0769	1.6611	1.8235	12.1591	0.0393	3.5989	5.8304	7.6194	1.351	0.7437
TCGA-HT-8564	478	0	1	MALE	Astrocytoma	47	Left	G3	WT	non-codel	Unmethylated	WT	WT	YES	YES	Non-response	Non-response	1.4552	2.1638	1.7068	0.6452	0.5895	0.5802	0.6977	1.0856	0.8887	0.6338	0.6294	3.4482	0.8973	12.114	0.7598	0.658	4.8017	1.4812	1.0421	0.75	1.1854	1.8316	2.0072	3.6307	0.0123	3.9997	6.3588	8.1584	1.4871	0.8186
TCGA-HT-A4DS	7	0	1	FEMALE	Astrocytoma	55	Right	G3	WT	non-codel	Unmethylated	Mutant	WT	NA	NA	NA	NA	1.2291	1.8275	1.4415	0.5449	0.4979	0.4903	0.589	0.9169	0.7517	0.5353	0.5338	2.9123	0.7578	10.252	0.6418	0.5558	4.0555	1.251	0.8801	0.6334	1.0012	1.5613	1.6953	17.4695	0.719	3.3725	5.5251	7.1171	1.256	0.6914
TCGA-HT-A4DV	792	0	1	FEMALE	Oligodendroglioma	51	Left	G3	Mutant	codel	Methylated	Mutant	WT	YES	YES	Response	NA	1.2389	1.8421	1.453	0.5493	0.5019	0.4942	0.594	0.9242	0.758	0.5396	0.538	2.9355	0.7639	10.3337	0.6469	0.5602	4.0878	1.261	0.8871	0.6385	1.0091	1.5742	1.7088	16.9384	0.7819	3.3851	5.5459	7.0322	1.266	0.6969
TCGA-HT-A5R5	4	0	1	FEMALE	Oligodendroglioma	33	Left	G2	Mutant	non-codel	Methylated	WT	Mutant	NA	NA	NA	NA	1.2994	1.9321	1.524	0.5761	0.5264	0.5176	0.6225	0.9694	0.7951	0.566	0.5643	3.0789	0.8012	10.8385	0.6785	0.5876	4.2875	1.3226	0.9305	0.6697	1.0584	1.6478	1.7923	13.5507	0.0087	3.5592	5.8027	7.5215	1.3279	0.7309
TCGA-HT-A5R7	615	0	1	FEMALE	Astrocytoma	33	Right	G3	Mutant	non-codel	Methylated	WT	Mutant	YES	YES	Response	Response	1.4258	2.12	1.6722	0.6321	0.5775	0.5658	0.6795	1.0636	0.8721	0.621	0.6192	3.3784	0.8791	11.8907	0.7445	0.6447	4.7046	1.4509	1.021	0.7348	1.1614	1.7889	1.9666	10.117	0.1966	3.3758	6.3935	4.021	1.457	0.802
TCGA-HT-A5R9	2	0	1	FEMALE	Oligodendroglioma	48	Right	G3	Mutant	codel	Methylated	Mutant	WT	NA	NA	NA	NA	1.4899	2.2153	1.7474	0.6605	0.6034	0.5939	0.7143	1.1115	0.9113	0.6489	0.647	3.5303	0.9186	12.4096	0.7779	0.6737	4.9161	1.5165	1.0669	0.7679	1.2136	1.8449	2.055	0.9999	0.0159	4.0796	6.6024	8.6369	1.5225	0.8381
TCGA-HT-A5RA	832	0	1	FEMALE	Astrocytoma	65	Right	G3	WT	non-codel	Unmethylated	Mutant	WT	YES	YES	Response	Response	1.231	1.8305	1.4438	0.5458	0.4987	0.4907	0.5902	0.9184	0.7534	0.5362	0.5346	2.917	0.759	10.2685	0.6428	0.5567	4.062	1.253	0.8815	0.6345	1.0028	1.5638	1.698	17.5073	0.5473	3.3804	5.539	7.1332	1.258	0.6925
TCGA-HT-A5RB	3	0	1	MALE	Astrocytoma	24	Right	G2	Mutant	non-codel	Methylated	WT	Mutant	NA	NA	NA	NA	1.232	1.8319	1.445	0.5462	0.499	0.4911	0.5907	0.9191	0.754	0.5366	0.3308	2.9193	0.7596	10.2765	0.6433	0.5571	4.0652	1.254	0.8822	0.635	1.0035	1.5656	1.6993	17.5726	0.9065	3.3683	5.5451	6.8746	1.259	0.693
TCGA-HT-A5RC	162	1	1	FEMALE	Astrocytoma	70	Left	G3	WT	non-codel	Unmethylated	WT	WT	YES	YES	NA	NA	1.4991	2.229	1.7582	0.6646	0.6073	0.5972	0.716	1.1183	0.9167	0.6529	0.6478	3.5521	0.9243	12.4536	0.7827	0.6779	4.9464	1.5259	1.0735	0.7726	1.2211	1.7685	2.0677	3.7768	0.0066	4.0692	6.3116	6.1421	1.5319	0.8432
TCGA-HT-A614	82	0	1	MALE	Oligoastrocytoma	47	Right	G2	Mutant	non-codel	Methylated	WT	Mutant	NA	NA	Response	Response	1.4301	2.1264	1.6773	0.634	0.5793	0.5699	0.6836	1.0667	0.8747	0.6229	0.621	3.3887	0.8818	11.9238	0.7467	0.6467	4.7189	1.4557	1.0241	0.737	1.1649	1.7984	1.9726	4.6644	0.2806	3.8747	6.4238	8.2455	1.4614	0.8044
TCGA-HT-A615	515	0	1	FEMALE	Oligodendroglioma	38	Left	G2	Mutant	codel	Methylated	Mutant	WT	NA	YES	Response	Response	1.4165	2.1062	1.6613	0.628	0.5738	0.565	0.679	1.0567	0.8664	0.617	0.615	3.3564	0.8734	11.8128	0.7396	0.6405	4.6739	1.4418	1.0143	0.73	1.1538	1.7948	1.9538	6.4033	0.0157	3.8914	5.827	8.0513	1.4475	0.7968
TCGA-HT-A616	55	0	1	FEMALE	Astrocytoma	36	Left	G2	Mutant	non-codel	Methylated	WT	Mutant	NA	NA	NA	NA	1.4853	2.2084	1.742	0.6585	0.6016	0.5919	0.7107	1.108	0.908	0.6469	0.645	3.5194	0.9158	12.3846	0.7755	0.6716	4.9008	1.5118	1.0636	0.7655	1.2098	1.7817	2.0486	3.3134	0.0071	3.4818	6.6167	7.2279	1.5178	0.8355
TCGA-HT-A617	491	0	1	MALE	Oligodendroglioma	47	Right	G2	WT	non-codel	Unmethylated	Mutant	WT	NA	NA	NA	NA	1.2312	1.8307	1.444	0.5459	0.4988	0.4909	0.5901	0.9185	0.7523	0.5363	0.5339	2.9174	0.7592	10.27	0.6429	0.5568	4.0626	1.2532	0.8817	0.6345	1.0029	1.5655	1.6983	17.1395	0.8978	3.3841	5.5312	7.1375	1.2582	0.6926
TCGA-HT-A618	512	0	1	FEMALE	Astrocytoma	37	NA	G3	Mutant	non-codel	Methylated	WT	Mutant	YES	YES	Response	Response	1.6782	2.4953	1.9682	0.744	0.6798	0.6685	0.804	1.2514	1.0257	0.7309	0.7287	3.9765	1.0347	13.9945	0.8762	0.7589	5.5359	1.7061	1.2017	0.8649	1.3301	1.9777	2.3147	2.1207	0.0097	0.1423	1.1933	7.2239	1.597	0.944
TCGA-HT-A619	651	0	1	FEMALE	Oligodendroglioma	51	Left	G3	Mutant	codel	Methylated	Mutant	WT	YES	NA	Response	Response	1.226	1.823	1.4379	0.5436	0.4967	0.4893	0.5878	0.9146	0.7503	0.534	0.5324	2.9051	0.7559	10.2264	0.6402	0.5544	4.0454	1.2479	0.8779	0.6319	0.9987	1.5589	1.6911	17.4629	0.9021	3.3698	5.5167	7.1072	1.2529	0.6896
TCGA-HT-A61A	194	0	1	FEMALE	Oligodendroglioma	20	Left	G2	Mutant	non-codel	Methylated	Mutant	WT	YES	YES	NA	NA	1.3335	1.9827	1.5639	0.5912	0.5401	0.5321	0.6365	0.9946	0.8139	0.5808	0.5664	3.1597	0.8222	11.1215	0.6963	0.603	4.3999	1.3573	0.9549	0.6872	1.0862	1.6799	1.8393	12.6663	0.0094	2.923	5.851	7.2208	1.3627	0.7501
TCGA-HT-A61B	533	0	1	MALE	Astrocytoma	22	Left	G3	Mutant	non-codel	Methylated	WT	WT	YES	YES	Response	Response	1.4105	2.0973	1.6543	0.6254	0.5714	0.5629	0.6763	1.0523	0.8621	0.6144	0.6125	3.3423	0.8697	11.7613	0.7365	0.6378	4.6542	1.4357	1.01	0.7269	1.1489	1.7801	1.9456	6.1651	0.0577	3.8666	6.3262	8.0896	1.4414	0.7934
TCGA-HT-A61C	537	1	1	MALE	Oligodendroglioma	66	Left	G3	WT	non-codel	Unmethylated	Mutant	WT	YES	YES	Response	Non-response	1.2259	1.8228	1.4378	0.5435	0.4966	0.4892	0.5878	0.9145	0.7502	0.5339	0.5324	2.9047	0.7558	10.2253	0.6401	0.5543	4.0449	1.2478	0.8778	0.6318	0.9985	1.5587	1.6909	17.4864	0.902	3.3694	5.5175	7.1064	1.2527	0.6896
TCGA-HT-A74H	74	0	1	MALE	Astrocytoma	62	Left	G3	WT	non-codel	Unmethylated	NA	WT	YES	YES	NA	NA	1.275	1.8958	1.4954	0.5653	0.5165	0.5086	0.6107	0.9512	0.7801	0.5553	0.5536	3.0211	0.7861	10.635	0.6657	0.5765	4.207	1.2978	0.913	0.6571	1.0386	1.597	1.7586	17.2733	0.9381	1.6497	5.5515	6.4037	1.3029	0.7172
TCGA-HT-A74J	320	0	1	MALE	Oligoastrocytoma	33	Left	G2	Mutant	non-codel	Unmethylated	NA	Mutant	NA	NA	NA	NA	1.4248	2.1185	1.6711	0.6317	0.5771	0.5675	0.683	1.0629	0.865	0.6206	0.6187	3.3761	0.8785	11.8358	0.744	0.6443	4.7013	1.4503	1.0203	0.7343	1.1606	1.8027	1.9653	5.3728	0.0077	3.9152	6.3223	8.1774	1.456	0.8015
TCGA-HT-A74K	467	0	1	FEMALE	Oligodendroglioma	58	Right	G3	Mutant	codel	Methylated	NA	WT	YES	YES	NA	NA	1.2421	1.8469	1.4568	0.5507	0.5032	0.4939	0.5953	0.9266	0.7602	0.541	0.5394	2.9433	0.7659	10.3609	0.6486	0.5617	4.0986	1.2643	0.8895	0.6402	1.0118	1.5708	1.7133	17.6929	0.1018	3.4134	5.5168	6.7979	1.2693	0.6987
TCGA-HT-A74L	336	0	1	FEMALE	Oligoastrocytoma	22	Right	G2	Mutant	codel	Methylated	NA	WT	NA	NA	Response	Response	1.4874	2.2116	1.7444	0.6594	0.6024	0.5927	0.7131	1.1096	0.9095	0.6478	0.6448	3.5244	0.9171	12.3602	0.7766	0.6726	4.9078	1.5139	1.0651	0.7666	1.2115	1.885	2.0515	1.074	0.0062	4.0752	6.6827	8.5887	1.5199	0.8367
TCGA-HT-A74O	3	0	1	MALE	Astrocytoma	34	Left	G3	Mutant	non-codel	Methylated	NA	Mutant	NA	NA	NA	NA	1.2322	1.8322	1.4452	0.5463	0.4992	0.4917	0.5908	0.9193	0.7541	0.5367	0.5351	2.9198	0.7598	10.2783	0.6434	0.5572	4.0659	1.2542	0.8824	0.6351	1.0037	1.5667	1.6996	17.5317	0.4494	3.3869	5.5292	7.1317	1.2592	0.6931
TCGA-HW-7486	1721	0	1	MALE	Oligodendroglioma	37	Right	G2	Mutant	codel	Methylated	Mutant	WT	YES	NA	Non-response	Non-response	1.2278	1.8257	1.4401	0.5444	0.4974	0.4894	0.5884	0.916	0.7514	0.5348	0.533	2.9094	0.7571	10.2417	0.6411	0.5552	4.0514	1.2498	0.8792	0.6328	1.0001	1.5604	1.6936	17.485	0.9025	3.3733	5.5271	7.1171	1.2547	0.6907
TCGA-HW-7487	1382	0	1	MALE	Oligodendroglioma	39	Left	G2	Mutant	codel	Methylated	Mutant	WT	YES	YES	Non-response	Non-response	1.2266	1.8238	1.4386	0.5438	0.4969	0.4888	0.5881	0.915	0.7506	0.5342	0.5319	2.9064	0.7563	10.231	0.6404	0.5546	4.0472	1.2485	0.8783	0.6321	0.9991	1.5591	1.6918	17.489	0.8713	3.3712	5.5188	7.0909	1.2534	0.6899
TCGA-HW-7489	1262	1	1	MALE	Oligoastrocytoma	38	Right	G2	Mutant	non-codel	Methylated	WT	Mutant	NA	NA	Non-response	Non-response	1.2261	1.823	1.438	0.5436	0.4966	0.4892	0.5878	0.9147	0.7503	0.534	0.5281	2.9052	0.756	10.2269	0.6402	0.5544	4.0456	1.248	0.878	0.6319	0.9987	1.5526	1.6911	17.487	0.9021	3.3675	5.5191	7.0971	1.2529	0.6897
TCGA-HW-7490	1387	0	1	MALE	Astrocytoma	41	Left	G2	Mutant	non-codel	Methylated	WT	Mutant	NA	NA	Non-response	Non-response	1.2264	1.8235	1.4384	0.5437	0.4968	0.4893	0.588	0.9149	0.7505	0.5342	0.5326	2.906	0.7562	10.2297	0.6404	0.5546	4.0467	1.2483	0.8782	0.6321	0.999	1.5581	1.6916	17.4764	0.9008	3.3672	5.5008	7.098	1.2533	0.6899
TCGA-HW-7491	2078	0	1	MALE	Oligodendroglioma	35	Right	G2	Mutant	codel	Unmethylated	Mutant	WT	YES	NA	Non-response	Non-response	1.3119	1.9507	1.5387	0.5817	0.5315	0.5215	0.6265	0.9775	0.8028	0.5714	0.5536	3.1087	0.8089	10.9432	0.685	0.5933	4.3289	1.3353	0.9395	0.6761	1.0687	1.4778	1.8096	18.5847	0.0697	3.3659	5.4084	2.7536	1.3407	0.738
TCGA-HW-7493	2107	0	1	FEMALE	Astrocytoma	40	Right	G2	NA	non-codel	Methylated	NA	NA	NA	YES	Non-response	Non-response	1.2291	1.8275	1.4415	0.5449	0.4979	0.489	0.5893	0.9162	0.7522	0.5353	0.5337	2.9124	0.7578	10.2521	0.6418	0.5558	4.0555	1.251	0.8801	0.6334	1.0012	1.5601	1.6953	17.4995	0.9044	3.3606	5.5298	6.923	1.256	0.6914
TCGA-HW-7495	1078	0	1	FEMALE	Oligodendroglioma	45	Right	G2	Mutant	codel	Methylated	Mutant	WT	NA	NA	Non-response	Non-response	1.4073	2.0926	1.6502	0.6239	0.5701	0.5614	0.6729	1.0498	0.8606	0.613	0.6112	3.3347	0.8677	11.7388	0.7348	0.6364	4.6437	1.4318	1.0078	0.7253	1.1463	1.1472	1.9411	20.0421	0.8289	0.6226	3.0331	0.8453	1.4382	0.7916
TCGA-HW-8319	1209	1	2	FEMALE	Astrocytoma	34	Left	G3	Mutant	non-codel	Unmethylated	WT	Mutant	YES	YES	Non-response	Non-response	1.634	1.0072	2.6449	0.9998	0.9136	0.8984	1.08	1.6822	1.3553	0.9822	0.9793	0.0322	1.3901	0.03	1.1775	1.0198	7.4412	2.2954	1.6149	1.1623	1.8369	2.1593	3.1103	0.2539	0.0247	1.6865	0.3311	4.7931	2.2977	1.2685
TCGA-HW-8320	1217	0	1	MALE	Astrocytoma	36	Right	G3	Mutant	non-codel	Methylated	WT	WT	YES	YES	Non-response	Non-response	1.2531	1.8632	1.4697	0.5556	0.5076	0.4986	0.5996	0.9348	0.7669	0.5458	0.5442	2.9693	0.7726	10.4524	0.6543	0.5666	4.1348	1.2755	0.8973	0.6458	1.0207	1.4259	1.7284	17.8488	0.885	3.1951	4.8784	6.2758	1.2806	0.7049
TCGA-HW-8321	1294	0	2	MALE	Astrocytoma	31	Left	G3	Mutant	non-codel	Methylated	WT	WT	YES	YES	Non-response	Non-response	0.3173	0.4585	2.2092	0.8351	0.763	0.7488	0.9012	1.4048	1.1296	0.8204	0.818	0.5812	1.1582	0.0174	0.9835	0.8518	6.2152	1.9172	1.3488	0.9708	1.5343	2.3698	2.5981	0.0672	0.8323	4.998	5.9239	10.9171	1.9237	1.0595
TCGA-HW-8322	758	0	1	MALE	Oligodendroglioma	39	Left	G2	Mutant	codel	Methylated	Mutant	WT	YES	NA	Non-response	Non-response	1.2735	1.8936	1.4937	0.5646	0.5159	0.5061	0.6089	0.9498	0.7793	0.5547	0.5531	3.0177	0.7852	10.6229	0.665	0.5759	4.2022	1.2963	0.912	0.6564	1.0374	1.3677	1.7566	18.0284	0.24	3.2538	5.5713	5.0065	1.3014	0.7164
TCGA-HW-A5KJ	962	1	2	MALE	Oligodendroglioma	68	Right	G3	Mutant	codel	Methylated	Mutant	WT	YES	YES	Non-response	Non-response	1.8309	2.6411	2.1483	0.8121	0.742	0.7294	0.8777	1.3662	1.1017	0.7978	0.7954	0.5842	1.1294	0.0993	0.9564	0.8283	6.0438	1.8644	1.3116	0.944	1.492	2.25	2.5265	0.1398	0.3017	4.8635	7.3578	8.4244	1.8718	1.0303
TCGA-HW-A5KK	388	1	2	MALE	Astrocytoma	64	Right	G3	WT	non-codel	Methylated	Mutant	WT	YES	YES	Non-response	NA	0.4813	0.0525	2.1629	0.8176	0.7471	0.7338	0.8837	1.3757	1.108	0.8032	0.8009	0.9632	1.0165	0.0116	0.9629	0.8339	6.085	1.8771	1.3205	0.9504	1.5022	2.2997	2.5436	0.5733	0.5399	4.3972	8.1403	10.6408	1.8845	1.0372
TCGA-HW-A5KL	878	0	2	FEMALE	Astrocytoma	42	Right	G2	Mutant	non-codel	Methylated	WT	Mutant	YES	YES	Non-response	Non-response	1.928	2.8589	2.2613	0.8548	0.781	0.768	0.9189	1.4355	1.1595	0.8398	0.8373	3.0402	1.1888	0.3122	1.0067	0.8718	6.3618	1.9625	1.3806	0.9937	1.5705	1.7951	2.6594	0.0205	0.1936	2.3098	4.1246	8.1735	1.9703	1.0845
TCGA-HW-A5KM	630	0	2	MALE	Astrocytoma	35	Left	G2	Mutant	non-codel	Methylated	WT	WT	NA	NA	Non-response	Non-response	0.4037	0.7307	2.1857	0.8262	0.7549	0.7411	0.8934	1.3901	1.1108	0.8117	0.8093	0.1126	1.1472	0.0136	0.9731	0.8427	6.1492	1.8969	1.3345	0.9605	1.518	2.2706	2.5705	0.3204	0.0209	5.1168	8.2246	10.0369	1.9044	1.0483
TCGA-IK-7675	578	1	2	MALE	Oligodendroglioma	43	Right	G2	Mutant	non-codel	Methylated	WT	Mutant	YES	YES	Non-response	Non-response	0.1077	0.0326	2.8517	1.0815	0.9875	0.9679	1.167	1.8153	1.4166	1.0625	1.0484	0.004	0.6362	0.0162	1.2737	1.103	8.0488	2.4825	1.7467	1.2572	1.987	1.7007	3.3646	0.0422	0.0161	1.9104	2.5005	0.4946	2.4913	1.3685
TCGA-IK-8125	1301	0	1	MALE	Oligoastrocytoma	62	Left	G3	Mutant	codel	Methylated	Mutant	WT	YES	YES	Response	Response	1.254	1.8646	1.4707	0.556	0.5079	0.4997	0.6012	0.9355	0.7674	0.5462	0.4468	2.9714	0.7732	10.4598	0.6548	0.567	4.1377	1.2763	0.898	0.6463	1.0214	1.5903	1.7296	17.706	0.0102	3.4282	4.7603	7.193	1.2815	0.7054
TCGA-KT-A74X	438	0	1	MALE	Oligoastrocytoma	26	Left	G3	Mutant	codel	Methylated	NA	WT	YES	YES	Non-response	Non-response	1.2258	1.8226	1.4376	0.5434	0.4965	0.4889	0.5877	0.9144	0.7501	0.5339	0.5323	2.9045	0.7558	10.2243	0.64	0.5543	4.0446	1.2477	0.8777	0.6317	0.9984	1.5585	1.6907	17.4837	0.9019	3.3691	5.5152	7.1032	1.2526	0.6895
TCGA-KT-A7W1	438	0	1	FEMALE	Astrocytoma	45	Right	G3	WT	non-codel	Methylated	NA	WT	YES	YES	Non-response	Non-response	1.5589	2.3179	1.8283	0.6911	0.6315	0.6199	0.7471	1.163	0.9515	0.679	0.6763	3.6938	0.9612	12.9985	0.814	0.7049	5.1438	1.5867	1.1163	0.8034	1.2698	1.7806	2.1502	5.3228	0.0122	3.6815	3.041	4.7342	1.593	0.8769
TCGA-P5-A72U	7	0	1	FEMALE	Oligodendroglioma	71	Right	G3	WT	non-codel	Methylated	NA	WT	NA	NA	Response	NA	1.4676	2.1822	1.7213	0.6507	0.5945	0.5855	0.7037	1.0949	0.8965	0.6392	0.6373	3.4775	0.9049	12.0929	0.7663	0.6636	4.8426	1.4938	1.0509	0.7564	1.1954	1.8639	2.0243	1.9708	0.4666	4.0338	6.6063	8.5021	1.4998	0.8255
TCGA-P5-A72W	317	0	1	MALE	Astrocytoma	35	Left	G3	Mutant	non-codel	Unmethylated	NA	Mutant	NA	YES	NA	NA	1.451	2.1576	1.7019	0.6433	0.5878	0.578	0.6953	1.0825	0.8871	0.632	0.6301	3.4383	0.8947	12.0674	0.7577	0.6562	4.7879	1.477	1.0391	0.7478	1.182	1.8362	2.0015	3.3354	0.2301	3.8776	6.5097	8.407	1.4828	0.8162
TCGA-P5-A72X	403	0	1	MALE	Astrocytoma	21	Left	G3	Mutant	non-codel	Methylated	NA	WT	NA	YES	NA	NA	1.3871	2.0626	1.6269	0.615	0.5619	0.5534	0.6651	1.0348	0.8485	0.6042	0.6024	3.2869	0.8553	11.5697	0.7243	0.6273	4.5771	1.4119	0.9933	0.7149	1.1299	1.7616	1.9133	7.4778	0.1688	3.8127	6.2361	8.0401	1.4175	0.7803
TCGA-P5-A72Z	354	0	1	FEMALE	Oligodendroglioma	64	Left	G3	Mutant	codel	Methylated	NA	WT	YES	YES	NA	NA	1.3902	2.0671	1.6305	0.6164	0.5632	0.5543	0.6658	1.0371	0.8503	0.6055	0.6037	3.2942	0.8572	11.5876	0.7259	0.6287	4.5872	1.4151	0.9955	0.7165	1.1324	1.7371	1.9175	7.9357	0.0164	3.7761	6.2099	7.6828	1.4207	0.782
TCGA-P5-A730	333	0	1	MALE	Oligoastrocytoma	22	Right	G3	Mutant	codel	Methylated	NA	WT	NA	NA	Response	NA	1.3781	2.0491	1.6163	0.611	0.5583	0.55	0.6607	1.0281	0.8426	0.6002	0.5985	3.2654	0.8497	11.4727	0.7196	0.6232	4.5472	1.4027	0.9868	0.7102	1.1225	1.7518	1.9008	7.3494	0.9395	3.7877	6.1804	7.9863	1.4083	0.7752
TCGA-P5-A731	274	0	1	FEMALE	Oligoastrocytoma	59	Right	G2	Mutant	non-codel	Methylated	NA	WT	NA	YES	NA	NA	1.4257	2.1199	1.6721	0.6321	0.5775	0.5686	0.6835	1.0636	0.8716	0.621	0.6188	3.3782	0.879	11.8753	0.7444	0.6447	4.7043	1.4512	1.0209	0.7348	1.1613	1.811	1.9665	5.1716	0.0178	3.9186	6.3981	8.195	1.4569	0.802
TCGA-P5-A733	414	0	1	FEMALE	Astrocytoma	52	Left	G2	Mutant	non-codel	Methylated	NA	Mutant	YES	YES	NA	NA	1.5029	2.2347	1.7627	0.6663	0.6088	0.599	0.7206	1.1212	0.9179	0.6546	0.6527	3.5612	0.9267	11.9999	0.7847	0.6796	4.9591	1.5298	1.0762	0.7746	1.2242	1.9099	2.073	0.6436	0.0105	4.1277	6.5839	8.7111	1.5358	0.8454
TCGA-P5-A735	292	0	1	FEMALE	Astrocytoma	38	Left	G2	Mutant	non-codel	Methylated	NA	Mutant	NA	NA	Response	Response	1.2839	1.9091	1.5059	0.5692	0.5201	0.5123	0.6156	0.9578	0.7853	0.5592	0.5576	3.0424	0.7917	10.6965	0.6704	0.5806	4.2366	1.3069	0.9194	0.6617	1.0458	1.6315	1.771	13.6187	0.9158	3.5288	5.771	7.443	1.3121	0.7222
TCGA-P5-A736	230	0	1	FEMALE	Astrocytoma	44	Right	G3	Mutant	non-codel	Methylated	NA	Mutant	NA	YES	Response	Response	1.4599	2.1707	1.7122	0.6472	0.5914	0.5825	0.7	1.0891	0.8929	0.6359	0.634	3.4593	0.9001	12.1119	0.7623	0.6602	4.8171	1.486	1.0454	0.7524	1.1892	1.8508	2.0137	2.7246	0.1588	4.0125	6.5503	8.4626	1.4919	0.8212
TCGA-P5-A737	372	0	1	MALE	Oligoastrocytoma	47	Right	G2	Mutant	codel	Methylated	NA	WT	NA	NA	NA	NA	1.2461	1.8529	1.4615	0.5525	0.5048	0.4968	0.5975	0.9296	0.7625	0.5428	0.5412	2.9527	0.7683	10.3942	0.6507	0.5635	4.1118	1.2684	0.8923	0.6422	1.015	1.5808	1.7188	17.0121	0.0444	3.4236	5.5857	7.2227	1.2734	0.701
TCGA-P5-A77W	584	0	1	FEMALE	Oligoastrocytoma	37	Left	G3	Mutant	codel	Methylated	NA	WT	NA	NA	NA	NA	1.434	2.1322	1.6818	0.6357	0.5809	0.5722	0.6875	1.0698	0.8756	0.6246	0.6227	3.3978	0.8841	11.8203	0.7487	0.6484	4.7316	1.4596	1.0268	0.739	1.168	1.8178	1.9779	4.4014	0.4218	3.9362	6.4537	8.1665	1.4654	0.8066
TCGA-P5-A77X	105	0	1	FEMALE	Oligoastrocytoma	55	Right	G2	Mutant	codel	Methylated	NA	WT	NA	YES	Response	Response	1.4902	2.2158	1.7478	0.6607	0.6037	0.594	0.7145	1.1117	0.9093	0.6491	0.6472	3.5311	0.9188	12.339	0.7781	0.6739	4.9172	1.5168	1.0671	0.768	1.2139	1.8874	2.0555	0.8666	0.0325	4.0933	6.7042	8.6327	1.5229	0.8383
TCGA-P5-A780	72	0	1	FEMALE	Astrocytoma	44	Right	G3	Mutant	non-codel	Methylated	NA	WT	NA	YES	Response	Response	1.462	2.1739	1.7147	0.6482	0.5923	0.5826	0.701	1.0907	0.8943	0.6368	0.6349	3.4643	0.9014	12.0986	0.7634	0.6611	4.8241	1.4881	1.0469	0.7535	1.1909	1.8494	2.0166	2.8984	0.009	4.0017	6.5324	8.3991	1.494	0.8224
TCGA-P5-A781	134	0	1	FEMALE	Astrocytoma	34	Right	G3	Mutant	codel	Methylated	NA	WT	NA	YES	Response	Response	1.2259	1.8228	1.4378	0.5435	0.4966	0.4889	0.5878	0.9145	0.7502	0.534	0.5324	2.9048	0.7559	10.2256	0.6401	0.5544	4.0451	1.2478	0.8778	0.6318	0.9986	1.5563	1.6909	17.4819	0.9014	3.3695	5.5173	7.1019	1.2528	0.6896
TCGA-QH-A65R	461	0	1	FEMALE	Oligodendroglioma	38	Left	G3	Mutant	codel	Methylated	NA	WT	YES	YES	Response	Non-response	1.2371	1.8394	1.4509	0.5485	0.5011	0.4932	0.5931	0.9229	0.7571	0.5388	0.5372	2.9313	0.7627	10.3186	0.6459	0.5594	4.0819	1.2592	0.8858	0.6376	1.0077	1.5424	1.7063	17.5308	0.7489	3.3889	5.5392	6.5922	1.2642	0.6959
TCGA-QH-A65S	77	0	1	FEMALE	Oligoastrocytoma	32	Left	G2	Mutant	non-codel	Methylated	WT	Mutant	NA	NA	Response	Response	1.372	2.04	1.6091	0.6083	0.5558	0.5455	0.6566	1.0211	0.8382	0.5976	0.5958	3.2509	0.8459	11.4193	0.7164	0.6204	4.527	1.3962	0.9824	0.7071	1.1175	1.7376	1.8924	14.8376	1.0005	3.3328	6.1722	1.2845	1.402	0.7717
TCGA-QH-A65V	384	0	1	FEMALE	Oligodendroglioma	43	Right	G2	Mutant	codel	Methylated	Mutant	WT	YES	NA	Non-response	NA	1.306	1.942	1.5318	0.579	0.5291	0.5204	0.6257	0.9743	0.7993	0.5689	0.5672	3.0947	0.8053	10.8941	0.6819	0.5906	4.3095	1.3294	0.9352	0.6731	1.0639	1.5795	1.8015	18.6014	0.943	3.5866	5.8738	1.1609	1.3347	0.7347
TCGA-QH-A65X	482	0	1	FEMALE	Oligoastrocytoma	28	Right	G3	Mutant	codel	Methylated	NA	WT	YES	YES	Non-response	Non-response	1.2354	1.8369	1.4489	0.5477	0.5005	0.4916	0.5913	0.9216	0.756	0.5381	0.5365	2.9273	0.7617	10.3047	0.6451	0.5586	4.0764	1.2575	0.8846	0.6367	1.0063	1.5269	1.704	17.5796	0.9089	3.0481	5.4999	6.8692	1.2625	0.6949
TCGA-QH-A65Z	427	0	1	MALE	Oligodendroglioma	54	Right	G2	Mutant	codel	Methylated	Mutant	WT	YES	YES	Non-response	NA	1.226	1.8229	1.4379	0.5435	0.4966	0.4887	0.5878	0.9146	0.7503	0.534	0.5324	2.905	0.7559	10.2261	0.6401	0.5544	4.0453	1.2479	0.8779	0.6318	0.9986	1.5575	1.691	17.4799	0.9021	3.3695	5.5186	7.1012	1.2528	0.6896
TCGA-QH-A6CS	588	0	1	MALE	Astrocytoma	41	Right	G3	WT	non-codel	Unmethylated	NA	WT	YES	YES	Non-response	NA	1.4688	2.184	1.7227	0.6512	0.595	0.5843	0.7034	1.0958	0.8982	0.6398	0.6379	3.4804	0.9056	12.2384	0.7669	0.6642	4.8466	1.4951	1.0518	0.757	1.1964	1.8556	2.026	1.2859	0.9561	4.0254	6.6092	8.5147	1.501	0.8262
TCGA-QH-A6CU	451	0	1	FEMALE	Oligodendroglioma	52	Left	G3	Mutant	codel	Methylated	NA	WT	YES	YES	Non-response	Non-response	1.2272	1.8247	1.4393	0.5441	0.4971	0.489	0.5883	0.9155	0.751	0.5345	0.5329	2.9078	0.7566	10.236	0.6408	0.5549	4.0492	1.2491	0.8787	0.6324	0.9996	1.5575	1.6926	17.495	0.8902	3.3498	5.519	7.0538	1.254	0.6903
TCGA-QH-A6CV	442	0	1	MALE	Oligoastrocytoma	51	Right	G3	WT	non-codel	Unmethylated	NA	WT	NA	YES	Non-response	Non-response	1.2327	1.8329	1.4458	0.5465	0.4994	0.4907	0.5899	0.9196	0.7544	0.5369	0.5353	2.9209	0.76	10.2821	0.6436	0.5574	4.0674	1.2547	0.8827	0.6353	1.0041	1.5129	1.7003	17.5724	0.6194	3.3432	5.3832	7.1444	1.2597	0.6934
TCGA-QH-A6CW	414	0	1	MALE	Oligoastrocytoma	43	Right	G3	Mutant	non-codel	Methylated	NA	Mutant	NA	NA	Response	Response	1.3343	1.984	1.5649	0.5916	0.5405	0.5326	0.6384	0.9952	0.8158	0.5812	0.5795	3.1617	0.8227	11.1298	0.6967	0.6034	4.4028	1.3581	0.9555	0.6877	1.0869	1.3036	1.8404	18.2661	0.023	3.5729	4.2085	2.9007	1.3635	0.7506
TCGA-QH-A6CX	372	1	1	MALE	Astrocytoma	66	Left	G2	WT	non-codel	Unmethylated	NA	WT	NA	YES	Non-response	NA	1.3189	1.9611	1.5469	0.5847	0.5343	0.5249	0.6307	0.9839	0.8062	0.5745	0.5728	3.1252	0.8132	11.0012	0.6887	0.5964	4.3519	1.3425	0.9444	0.6797	1.0743	1.3063	1.8192	18.6511	0.0803	2.2181	3.1466	5.6909	1.3478	0.7419
TCGA-QH-A6CY	408	0	1	MALE	Oligoastrocytoma	38	Right	G3	Mutant	codel	Methylated	NA	WT	YES	YES	Non-response	Non-response	1.2259	1.8228	1.4378	0.5435	0.4966	0.4891	0.5877	0.9145	0.7502	0.5339	0.5324	2.9048	0.7559	10.2254	0.6401	0.5543	4.045	1.2478	0.8778	0.6318	0.9986	1.5577	1.6909	17.4866	0.902	3.3666	5.5172	7.1061	1.2527	0.6896
TCGA-QH-A6CZ	279	0	1	MALE	Oligoastrocytoma	38	Right	G2	Mutant	codel	Methylated	NA	WT	NA	NA	Non-response	Non-response	1.2646	1.8803	1.4831	0.5606	0.5123	0.5035	0.6046	0.9434	0.7739	0.5508	0.5492	2.9964	0.7797	10.5479	0.6603	0.5718	4.1726	1.2871	0.9055	0.6517	1.0301	1.5277	1.7442	17.9786	0.0289	3.4601	5.2482	5.6998	1.2923	0.7113
TCGA-QH-A6X3	313	0	2	MALE	Oligoastrocytoma	27	Right	G2	Mutant	non-codel	Methylated	NA	Mutant	NA	NA	Response	Response	2.0938	3.093	2.4569	0.9287	0.8486	0.8344	1.0021	1.5359	1.2632	0.9124	0.9097	1.1212	1.2916	0.1555	1.0938	0.9473	6.9121	2.1314	1.5001	1.0796	1.7063	2.2157	2.8805	0.1753	0.0165	1.0359	0.2815	9.0315	1.2181	1.1783
TCGA-QH-A6X4	442	0	1	MALE	Oligoastrocytoma	47	Left	G3	Mutant	codel	Methylated	NA	WT	YES	YES	Response	Response	1.2265	1.8237	1.4385	0.5438	0.4968	0.4893	0.5873	0.915	0.7499	0.5342	0.5326	2.9062	0.7562	10.2304	0.6404	0.5546	4.047	1.2484	0.8783	0.6321	0.999	1.5559	1.6917	17.4841	0.9025	3.3621	5.5196	7.11	1.2534	0.6899
TCGA-QH-A6X5	497	0	1	FEMALE	Oligoastrocytoma	58	Left	G2	Mutant	codel	Methylated	NA	WT	NA	NA	NA	NA	1.227	1.8245	1.4391	0.544	0.4971	0.4888	0.5883	0.9154	0.749	0.5345	0.5329	2.9075	0.7566	10.2351	0.6407	0.5549	4.0488	1.2489	0.8787	0.6324	0.9995	1.5581	1.6925	17.5014	0.9029	3.3709	5.5221	7.1132	1.2539	0.6902
TCGA-QH-A6X8	509	0	1	FEMALE	Oligodendroglioma	56	Left	G3	Mutant	codel	Methylated	NA	WT	YES	YES	Non-response	Non-response	1.2782	1.9006	1.4992	0.5667	0.5178	0.5087	0.6128	0.9536	0.7822	0.5567	0.5551	3.0288	0.7881	10.662	0.6674	0.578	4.2177	1.3011	0.9153	0.6588	1.0412	1.3216	1.7631	18.0801	0.0624	3.4279	5.5899	4.7845	1.3062	0.719
TCGA-QH-A6X9	58	0	2	FEMALE	Oligodendroglioma	73	Right	G2	Mutant	non-codel	Methylated	NA	Mutant	NA	NA	NA	NA	1.6462	2.4478	1.9308	0.7299	0.6669	0.6563	0.7892	1.2281	0.9861	0.717	0.7149	3.899	1.015	3.1934	0.8596	0.7444	5.4319	1.6756	1.1788	0.8484	1.3409	2.0738	2.2707	0.1174	0.8919	4.5238	7.3897	9.5431	1.6823	0.926
TCGA-QH-A6XA	502	0	1	FEMALE	Oligoastrocytoma	23	Left	G2	Mutant	non-codel	Methylated	NA	Mutant	NA	NA	Response	Response	1.9917	2.9615	2.3009	0.883	0.8068	0.7917	0.9511	1.1962	1.2141	0.8675	0.865	4.7193	1.2281	10.3566	1.0399	0.9007	6.4215	2.0273	1.4263	1.0265	1.6222	0.8977	2.7459	0.3728	0.8262	0.2738	0.4589	0.2523	1.6743	1.1204
TCGA-QH-A6XC	508	0	1	MALE	Astrocytoma	48	Right	G3	WT	non-codel	Methylated	NA	WT	YES	YES	NA	NA	1.2432	1.8485	1.4581	0.5512	0.5036	0.4946	0.596	0.9273	0.7495	0.5415	0.5399	2.9458	0.7665	10.37	0.6491	0.5622	4.1022	1.2624	0.8902	0.6407	1.0127	1.5728	1.7148	17.1406	0.3647	3.4035	5.5038	7.1487	1.2705	0.6993
TCGA-QH-A86X	337	0	1	MALE	Oligodendroglioma	33	Left	G2	Mutant	codel	Methylated	NA	WT	NA	NA	Response	Response	1.2263	1.8234	1.4383	0.5437	0.4968	0.4888	0.5879	0.9147	0.7505	0.5341	0.5325	2.9058	0.7561	10.2288	0.6403	0.5545	4.0464	1.2482	0.8781	0.632	0.9989	1.5557	1.6915	17.4882	0.9023	3.3692	5.518	7.0776	1.2532	0.6898
TCGA-QH-A870	395	0	1	FEMALE	Oligoastrocytoma	38	Right	G3	Mutant	non-codel	Methylated	NA	Mutant	YES	NA	Response	Non-response	1.2258	1.8226	1.4377	0.5435	0.4966	0.4887	0.5877	0.9145	0.7502	0.5339	0.5323	2.9045	0.7558	10.2246	0.64	0.5543	4.0447	1.2477	0.8778	0.6317	0.9985	1.5585	1.6907	17.4813	0.902	3.3674	5.5178	7.1052	1.2526	0.6895
TCGA-R8-A6MK	2702	0	1	MALE	Oligodendroglioma	40	Right	G2	Mutant	codel	Methylated	NA	WT	NA	NA	NA	NA	1.2271	1.8245	1.4391	0.544	0.4971	0.4897	0.5875	0.9154	0.7509	0.5345	0.5329	2.9076	0.7566	10.2352	0.6407	0.5549	4.0489	1.249	0.8787	0.6324	0.9995	1.5587	1.6925	17.5023	0.9029	3.3669	5.5218	7.0195	1.2539	0.6902
TCGA-R8-A6ML	2860	0	1	MALE	Oligodendroglioma	52	Left	G3	Mutant	codel	Methylated	NA	WT	NA	NA	NA	NA	1.2426	1.8476	1.4574	0.5509	0.5034	0.495	0.5957	0.9269	0.7604	0.5412	0.5396	2.9443	0.7661	10.3646	0.6488	0.5619	4.1001	1.2648	0.8898	0.6404	1.0122	1.4681	1.7139	17.5952	0.6993	3.4	5.5618	6.3319	1.2698	0.699
TCGA-R8-A6MO	993	0	1	FEMALE	Oligodendroglioma	53	Right	G2	Mutant	codel	Methylated	NA	WT	NA	NA	NA	NA	1.226	1.8229	1.4379	0.5435	0.4966	0.4892	0.5878	0.9146	0.7503	0.534	0.5324	2.905	0.7559	10.2263	0.6401	0.5544	4.0454	1.2479	0.8779	0.6319	0.9986	1.5577	1.691	17.4688	0.9021	3.3693	5.5163	7.1042	1.2529	0.6896
TCGA-R8-A73M	1806	0	1	FEMALE	Oligodendroglioma	48	Left	G2	Mutant	codel	Methylated	NA	WT	NA	NA	NA	NA	1.5406	2.2907	1.7834	0.683	0.6241	0.6106	0.7352	0.6993	0.9428	0.671	0.6689	3.6505	0.9499	12.8505	0.8044	0.6967	5.0807	1.5598	1.0975	0.794	0.9126	0.8745	0.1513	21.9532	0.0131	0.033	0.0147	1.0556	0.0073	0.8666
TCGA-RY-A83X	939	0	1	FEMALE	Oligodendroglioma	46	Right	G2	Mutant	codel	Methylated	NA	WT	NA	NA	NA	Non-response	1.8827	2.7994	2.1661	0.8347	0.7627	0.7477	0.8773	0.918	1.1394	0.82	0.7834	4.4612	1.1608	14.5571	0.983	0.8514	6.2035	1.9149	1.3482	0.9703	1.5284	1.4081	2.5969	0.1712	0.0198	0.3139	1.6633	0.4904	1.9178	1.059
TCGA-RY-A83Y	166	0	1	MALE	Oligodendroglioma	45	Left	G2	Mutant	codel	Methylated	NA	WT	NA	NA	NA	NA	1.5606	2.3205	1.8275	0.6919	0.6322	0.622	0.7478	1.1626	0.9532	0.6797	0.6777	3.6979	0.9622	13.0074	0.8149	0.7057	5.1486	1.5702	1.1175	0.8043	1.2712	1.9092	2.1526	4.8135	0.0128	4.1353	6.9976	0.6317	1.5948	0.8779
TCGA-RY-A83Z	301	0	1	FEMALE	Astrocytoma	54	Left	G3	Mutant	non-codel	Methylated	NA	Mutant	NA	NA	NA	NA	1.9003	2.8256	1.9938	0.8425	0.7698	0.7547	0.9011	1.4163	1.1598	0.8277	0.8252	4.5029	1.1717	15.8008	0.9922	0.8593	6.2704	1.9333	1.3608	0.9794	1.547	0.5754	2.5212	1.1741	0.0217	0.3535	0.0951	0.2215	0.6407	1.0689
TCGA-RY-A840	854	0	1	MALE	Oligodendroglioma	47	Left	G3	Mutant	codel	Methylated	NA	WT	NA	NA	Non-response	Non-response	1.5096	2.2447	1.7706	0.6693	0.6116	0.601	0.7187	1.1262	0.9233	0.6575	0.655	3.5772	0.9308	12.4999	0.7883	0.6827	4.9813	1.5366	1.081	0.778	1.2297	1.9096	2.0823	0.9768	0.0124	3.9933	6.6828	7.7074	1.5427	0.8492
TCGA-RY-A843	63	0	1	MALE	Astrocytoma	30	Left	G3	Mutant	non-codel	Methylated	NA	WT	NA	NA	NA	Non-response	1.4076	2.0929	1.641	0.6241	0.5702	0.5614	0.6727	1.05	0.8612	0.6131	0.6113	3.3353	0.8679	11.741	0.735	0.6365	4.6445	1.4327	1.0079	0.7254	1.1466	1.3555	1.9415	19.523	0.0131	1.5866	3.4213	0.5542	1.4384	0.7918
TCGA-RY-A845	596	0	1	FEMALE	Oligoastrocytoma	40	Left	G2	Mutant	non-codel	Methylated	NA	WT	NA	NA	NA	NA	1.5037	2.2359	1.7636	0.6667	0.6091	0.5991	0.7189	1.1218	0.9199	0.655	0.653	3.5631	0.9271	12.5423	0.7851	0.68	4.7745	1.4934	1.0768	0.775	1.2249	1.6717	2.0741	3.8978	0.0125	3.3433	4.5948	8.1541	1.5366	0.8458
TCGA-RY-A847	933	0	1	MALE	Oligodendroglioma	45	Right	G2	Mutant	codel	Methylated	NA	WT	NA	NA	NA	Non-response	2.0171	2.9992	2.3532	0.8943	0.8168	0.7998	0.9152	0.2878	1.2341	0.8786	0.8614	4.7796	1.2437	16.8251	1.0532	0.9114	1.7958	1.9948	0.5908	1.0396	0.2642	1.109	0.0044	7.5047	0.0088	0.0381	0.0089	0.9182	0.0002	1.1346
TCGA-S9-A6TS	1891	1	2	FEMALE	Astrocytoma	48	Right	G3	Mutant	non-codel	Methylated	NA	Mutant	YES	YES	Non-response	Non-response	1.7249	0.3562	2.7709	1.0475	0.9568	0.9395	1.1304	1.7625	1.3625	1.0291	0.9977	0.0408	1.4537	0.0253	1.2337	1.0684	7.796	2.4049	1.6919	1.2177	1.9245	2.541	3.2568	0.0571	0.013	1.052	0.3993	2.3279	2.3982	1.329
TCGA-S9-A6TU	2650	0	2	MALE	Astrocytoma	38	Left	G2	Mutant	non-codel	Methylated	NA	WT	NA	NA	Response	Non-response	1.7854	0.7564	0.0221	1.3793	1.2598	1.2296	1.4744	0.5272	1.8014	0.4634	0.9318	0.0198	1.9169	0.0331	1.6092	1.4056	6.4019	3.0909	1.0573	1.591	0.2219	0.5717	0.0144	0.0028	0.0277	0.0211	0.0174	0.0791	0.0025	1.75
TCGA-S9-A6TV	571	0	2	MALE	Oligoastrocytoma	50	Right	G3	Mutant	non-codel	Methylated	NA	Mutant	YES	YES	Response	NA	0.0091	0.018	0.1901	1.311	1.1978	1.1767	1.4012	2.2056	1.75	1.2625	1.2842	0.0004	0.0197	0.0064	1.5439	1.3358	9.7572	3.0099	1.052	1.5239	0.3777	1.2258	0.0275	0.0435	0.0626	0.0322	0.04	0.1043	0.0007	0.3865
TCGA-S9-A6TW	1250	0	1	MALE	Oligodendroglioma	40	Left	G3	Mutant	codel	Methylated	NA	WT	YES	YES	Response	Response	1.2814	1.9054	1.5029	0.5681	0.5191	0.511	0.6117	0.956	0.7842	0.5581	0.5563	3.0364	0.7901	10.6887	0.6691	0.5795	4.2283	1.3043	0.9176	0.6604	1.0438	1.5549	1.7675	18.035	0.3139	3.4566	5.7053	3.9749	1.3095	0.7208
TCGA-S9-A6TX	1245	0	1	MALE	Oligodendroglioma	46	Left	G3	Mutant	codel	Methylated	NA	WT	YES	YES	Response	Response	1.2284	1.8266	1.4408	0.5446	0.4976	0.49	0.5868	0.9161	0.7518	0.5351	0.5335	2.9108	0.7574	10.2467	0.6414	0.5555	4.0534	1.2504	0.8797	0.6331	1.0006	1.5596	1.6944	17.5223	0.9039	3.1804	5.5251	7.1209	1.2554	0.691
TCGA-S9-A6TY	1076	0	1	MALE	Oligodendroglioma	50	Left	G2	Mutant	codel	Methylated	NA	WT	YES	NA	Response	Non-response	1.2269	1.8243	1.439	0.544	0.497	0.4881	0.5882	0.9153	0.7508	0.5344	0.5328	2.9072	0.7565	10.234	0.6406	0.5548	4.0484	1.2488	0.8786	0.6323	0.9994	1.5599	1.6923	17.5013	0.9028	3.3722	5.5229	7.1117	1.2538	0.6901
TCGA-S9-A6TZ	1120	0	1	FEMALE	Astrocytoma	39	Left	G2	Mutant	non-codel	Methylated	NA	WT	NA	YES	Response	Non-response	1.2264	1.8235	1.4384	0.5437	0.4968	0.4879	0.5871	0.9149	0.7505	0.5342	0.5315	2.906	0.7562	10.2296	0.6404	0.5546	4.0467	1.2483	0.8782	0.6321	0.999	1.5571	1.6916	17.4773	0.9016	3.3679	5.5195	7.0911	1.2533	0.6899
TCGA-S9-A6U0	742	1	1	MALE	Astrocytoma	46	Right	G3	WT	non-codel	Methylated	NA	WT	YES	YES	Response	Non-response	1.2274	1.825	1.4395	0.5442	0.4972	0.4893	0.5884	0.9157	0.7511	0.5346	0.5323	2.9084	0.7568	10.238	0.6409	0.555	4.05	1.2493	0.8789	0.6326	0.9998	1.5581	1.693	17.5071	0.903	3.3644	5.5229	7.0199	1.2543	0.6904
TCGA-S9-A6U1	785	0	1	FEMALE	Astrocytoma	22	Right	G3	Mutant	non-codel	Methylated	NA	Mutant	YES	NA	Response	Response	1.2315	1.8311	1.4443	0.546	0.4988	0.4899	0.5904	0.9187	0.7532	0.5364	0.5348	2.918	0.7593	10.2719	0.643	0.5569	4.0634	1.2535	0.8818	0.6347	1.0031	1.5553	1.6986	17.3574	0.748	3.3827	5.5373	7.11	1.2584	0.6927
TCGA-S9-A6U2	908	0	1	FEMALE	Oligodendroglioma	48	Right	G2	Mutant	codel	Methylated	NA	WT	NA	YES	Response	Non-response	1.6087	2.392	1.8867	0.7132	0.6517	0.641	0.7702	1.2001	0.9832	0.7007	0.6986	3.8118	0.9919	12.3182	0.84	0.7274	5.3081	1.6374	1.1519	0.8291	1.3104	1.741	2.2189	0.5187	0.077	4.3366	7.0105	3.3611	1.6439	0.9049
TCGA-S9-A6U5	992	0	1	MALE	Astrocytoma	33	Right	G2	Mutant	codel	Methylated	NA	WT	NA	NA	Response	NA	2.2844	3.3967	2.6567	1.0128	0.9254	0.9028	1.0873	0.0184	1.3908	0.995	0.9883	5.4129	1.4085	13.2072	0.8026	1.033	1.1889	2.2258	1.6355	1.1773	0.1622	1.1005	0.9519	0.0397	0.0343	0.0069	0.0708	0.793	0.0028	1.285
TCGA-S9-A6U6	1069	0	2	MALE	Astrocytoma	28	Left	G3	Mutant	non-codel	Methylated	NA	Mutant	NA	YES	Response	Response	1.9305	2.87	2.2648	0.8561	0.7822	0.7702	0.9146	1.4405	1.1445	0.8411	0.6565	4.5738	1.1906	0.4499	1.0083	0.8732	6.3718	1.9656	1.3828	0.9952	1.5592	2.3804	2.6613	0.0395	0.0065	0.1036	4.5888	10.5388	0.1217	1.0862
TCGA-S9-A6U8	2988	1	1	MALE	Astrocytoma	24	Left	G2	Mutant	non-codel	Methylated	NA	Mutant	YES	YES	Response	Non-response	1.2257	1.8225	1.4376	0.5434	0.4965	0.4885	0.5877	0.9144	0.7501	0.5339	0.5323	2.9043	0.7557	10.2239	0.64	0.5543	4.0444	1.2475	0.8777	0.6317	0.9984	1.5585	1.6906	17.484	0.9019	3.3689	5.5171	7.1054	1.2526	0.6895
TCGA-S9-A6U9	2918	0	1	MALE	Astrocytoma	36	Right	G3	Mutant	non-codel	Methylated	NA	Mutant	NA	YES	Response	Non-response	1.2306	1.8297	1.4433	0.5456	0.4985	0.488	0.5891	0.918	0.7531	0.536	0.5344	2.9158	0.7587	10.2644	0.6425	0.5565	4.0604	1.2525	0.8812	0.6342	1.0024	1.5527	1.6973	17.5381	0.905	3.3514	5.5079	6.8535	1.2575	0.6922
TCGA-S9-A6UA	178	1	2	MALE	Astrocytoma	66	Right	G3	WT	non-codel	Methylated	NA	Mutant	NA	NA	Non-response	Non-response	0.0103	0.0319	0.0014	2.2262	2.0336	1.9853	2.2864	0.0024	2.9278	0.0007	2.1449	0.0008	0.0134	0.017	0.0009	0.0002	0.0192	0.0742	0.0022	0.1109	0	0.0383	0.0002	0.001	0.0555	0.0019	0.0069	0.023	0.0005	0.4472
TCGA-S9-A6UB	3761	0	1	MALE	Oligodendroglioma	52	Right	G2	Mutant	codel	Methylated	NA	WT	NA	NA	Response	Non-response	1.3338	1.9833	1.5642	0.5914	0.5403	0.5306	0.6319	0.3016	0.8163	0.581	0.5791	3.1606	0.8224	11.1259	0.6965	0.6032	4.234	1.3472	0.9551	0.6874	1.0865	1.6138	1.8398	18.9809	0.0955	2.7438	5.9691	1.8064	1.3631	0.7503
TCGA-S9-A6WD	2289	0	1	MALE	Oligodendroglioma	58	Left	G3	Mutant	codel	Methylated	NA	WT	YES	NA	Response	Non-response	1.2269	1.8242	1.4389	0.5439	0.497	0.4868	0.588	0.9151	0.7508	0.5344	0.5135	2.9071	0.7565	10.2336	0.6406	0.5548	4.0418	1.2486	0.8785	0.6323	0.9994	1.5555	1.6922	17.4985	0.9028	3.3673	5.522	7.1122	1.2537	0.6901
TCGA-S9-A6WE	4113	0	2	MALE	Oligodendroglioma	34	Right	G2	Mutant	codel	Methylated	NA	WT	YES	NA	Response	NA	2.8295	4.2065	0.0195	1.2545	1.1462	1.1193	1.3428	0.0207	1.7039	0.1878	1.2288	6.0239	1.7446	0.6585	0.0811	0.0086	6.7441	2.7261	0.0094	1.4176	0.0002	0.2199	0.0004	0.009	0.0578	0.0022	0.0079	0.0702	0.0013	1.5916
TCGA-S9-A6WG	2602	0	2	MALE	Astrocytoma	31	Right	G3	Mutant	non-codel	Methylated	NA	Mutant	YES	YES	Non-response	Non-response	2.1664	3.2212	2.5405	0.9605	0.8776	0.8638	1.0274	1.6161	1.2838	0.9436	0.9381	5.1224	1.3358	2.2038	1.1312	0.9796	7.1483	2.2051	1.5513	1.1165	1.7645	2.2493	2.8473	0.0257	0.0179	0.5641	0.198	1.852	0.251	1.2186
TCGA-S9-A6WH	1173	0	1	FEMALE	Oligoastrocytoma	73	Right	G2	Mutant	codel	Methylated	NA	WT	NA	YES	Response	Non-response	1.3548	2.0145	1.589	0.6007	0.5488	0.5385	0.6476	1.0107	0.8278	0.5901	0.5881	3.2103	0.8354	11.3007	0.7074	0.6127	4.4705	1.379	0.9702	0.6983	1.1036	1.6986	1.8688	10.5716	0.9842	3.7188	6.096	6.1357	1.3845	0.7621
TCGA-S9-A6WI	2585	0	1	FEMALE	Oligoastrocytoma	56	Right	G2	Mutant	non-codel	Methylated	NA	WT	NA	YES	Response	Non-response	1.2262	1.8233	1.4382	0.5437	0.4967	0.4888	0.5879	0.9148	0.7504	0.5341	0.5325	2.9056	0.7561	10.2284	0.6403	0.5545	4.0462	1.2482	0.8781	0.632	0.9989	1.5569	1.6914	17.4706	0.9023	3.3698	5.5199	7.1086	1.2531	0.6898
TCGA-S9-A6WL	946	0	1	MALE	Astrocytoma	52	Right	G3	Mutant	codel	Methylated	NA	WT	NA	YES	Non-response	NA	1.2276	1.8253	1.4398	0.5443	0.4973	0.4888	0.5886	0.9158	0.7513	0.5347	0.5229	2.9089	0.7569	10.2398	0.641	0.5551	4.0507	1.2495	0.8791	0.6327	1	1.5569	1.6933	17.4691	0.9032	3.3728	5.526	7.0913	1.2545	0.6905
TCGA-S9-A6WM	604	0	2	FEMALE	Astrocytoma	59	Left	G3	WT	non-codel	Unmethylated	NA	WT	YES	YES	Response	Non-response	1.8539	0.615	2.4184	0.9188	0.8395	0.8257	0.9922	1.542	1.2323	0.9027	0.8706	3.3299	1.2778	0.0318	1.0821	0.9372	6.8385	2.1094	1.4841	1.0681	1.6882	2.4515	2.8586	0.2338	0.0219	2.5085	7.6186	0.4848	2.1179	1.1658
TCGA-S9-A6WN	805	0	2	FEMALE	Astrocytoma	38	Left	G3	Mutant	codel	Methylated	NA	WT	YES	YES	Non-response	Non-response	0.1945	0.1281	1.0567	1.1559	1.0561	1.0362	1.2406	1.8944	1.5526	1.1353	1.1321	0.0031	1.493	0.0139	1.3613	1.1789	8.4896	2.6439	1.8669	1.3437	2.1237	1.0254	2.5838	0.0053	0.0363	2.345	0.057	0.3799	0.0993	1.4663
TCGA-S9-A6WO	566	0	2	MALE	Astrocytoma	29	Left	G2	Mutant	non-codel	Methylated	NA	Mutant	NA	YES	Non-response	Non-response	0.6254	0.9112	0.1689	1.4688	1.3418	1.314	1.5316	0.04	1.9631	1.394	1.4387	0.0115	2.0352	0.0255	1.2608	1.4159	1.6655	1.9127	0.4297	1.7066	0.008	0.7501	0.0094	0.0032	0.0321	0.0048	0.0128	0.205	0.0004	1.8636
TCGA-S9-A6WP	567	0	1	MALE	Oligoastrocytoma	42	Right	G3	Mutant	codel	Methylated	NA	WT	YES	NA	Response	Non-response	1.2271	1.8246	1.4392	0.544	0.4971	0.489	0.5866	0.9154	0.751	0.5345	0.5329	2.9077	0.7566	10.2357	0.6407	0.5549	4.0491	1.249	0.8787	0.6324	0.9996	1.5543	1.6926	17.4273	0.9029	3.3483	5.5231	7.1132	1.254	0.6903
TCGA-S9-A6WQ	428	0	1	FEMALE	Oligoastrocytoma	57	Left	G2	Mutant	non-codel	Methylated	NA	Mutant	NA	NA	Response	Non-response	1.5096	2.2447	1.7706	0.6693	0.6116	0.6016	0.7196	1.1187	0.9168	0.6575	0.6556	3.5772	0.9308	11.2741	0.7883	0.6827	4.9813	1.5363	1.081	0.778	1.2297	1.918	2.0823	0.5234	1.1045	3.5723	6.7726	8.6135	1.5427	0.8492
TCGA-S9-A7IQ	1099	0	1	FEMALE	Oligoastrocytoma	45	Left	G2	Mutant	codel	Methylated	NA	WT	NA	NA	Response	Non-response	1.3716	2.0395	1.5992	0.6081	0.5556	0.5468	0.6554	1.0228	0.8389	0.5974	0.5932	3.2502	0.8457	11.4412	0.7162	0.6203	4.5259	1.3962	0.9822	0.7069	1.1173	1.5592	1.8919	19.2279	0.0114	0.9593	5.8634	0.755	1.4017	0.7716
TCGA-S9-A7IS	241	1	1	FEMALE	Astrocytoma	33	Right	G3	Mutant	non-codel	Methylated	NA	Mutant	NA	YES	Non-response	Non-response	1.667	2.4787	1.9544	0.7391	0.6753	0.6624	0.7902	1.2436	1.0178	0.7261	0.7235	3.9501	1.0279	13.8484	0.8704	0.7538	5.5006	1.6968	1.1937	0.8591	1.3579	1.6951	2.2994	3.3136	0.0411	4.2081	2.2054	1.5841	1.7029	0.9377
TCGA-S9-A7IX	819	1	1	MALE	Astrocytoma	57	Right	G3	WT	non-codel	Unmethylated	NA	WT	YES	YES	Non-response	Non-response	1.3209	1.9641	1.5417	0.5856	0.5351	0.5241	0.6233	0.9854	0.8071	0.5753	0.5731	3.13	0.8145	11.0183	0.6897	0.5973	4.3586	1.3445	0.9459	0.6808	1.076	1.6566	1.822	18.6525	0.9683	3.5818	5.9326	0.3914	1.3499	0.743
TCGA-S9-A7IY	715	0	2	MALE	Oligoastrocytoma	39	Right	G3	Mutant	codel	Methylated	NA	WT	YES	YES	Response	Response	2.2275	3.2916	2.6124	0.9876	0.9024	0.8888	1.0634	1.6616	1.3309	0.9703	0.9673	2.3797	1.3735	0.3198	1.1631	1.0073	7.3504	2.2674	1.5952	1.1481	1.8145	2.1887	3.0631	0.0355	0.03	1.0028	0.5414	1.7412	1.6381	1.2531
TCGA-S9-A7IZ	608	0	1	FEMALE	Astrocytoma	48	Left	G3	Mutant	non-codel	Methylated	NA	Mutant	YES	YES	Response	Non-response	1.227	1.8244	1.439	0.544	0.497	0.4891	0.5883	0.9153	0.7508	0.5344	0.5319	2.9073	0.7565	10.2344	0.6407	0.5548	4.0485	1.2488	0.8786	0.6323	0.9994	1.553	1.6924	17.4851	0.8785	3.3724	5.5123	7.0807	1.2538	0.6902
TCGA-S9-A7J0	609	0	1	FEMALE	Oligodendroglioma	30	Right	G3	Mutant	non-codel	Methylated	NA	WT	YES	YES	Response	Non-response	1.2264	1.8235	1.4383	0.5437	0.4968	0.4891	0.5879	0.9149	0.7373	0.5342	0.5326	2.9059	0.7561	10.2294	0.6403	0.5546	4.0466	1.2483	0.8782	0.632	0.9989	1.5577	1.6915	17.4686	0.9023	3.3619	5.5179	7.1092	1.2532	0.6898
TCGA-S9-A7J1	249	0	1	MALE	Oligodendroglioma	43	Right	G2	Mutant	codel	Methylated	NA	WT	NA	NA	Response	NA	2.0683	3.0754	2.299	0.917	0.8379	0.8234	0.9905	1.5429	1.2384	0.9009	0.8982	4.9009	1.2753	10.1215	1.0799	0.9353	6.8246	2.1052	1.4811	1.066	1.6785	0.9642	1.8278	0.1303	0.0306	0.261	0.0657	0.3899	0.5262	1.1634
TCGA-S9-A7J2	62	0	1	MALE	Oligodendroglioma	25	Left	G3	Mutant	codel	Methylated	NA	WT	YES	NA	Response	NA	1.2262	1.8232	1.4381	0.5436	0.4967	0.4891	0.5849	0.9148	0.7504	0.5341	0.5325	2.9055	0.756	10.2279	0.6402	0.5545	4.046	1.2481	0.878	0.6319	0.9988	1.5576	1.6913	17.4909	0.9023	3.3494	5.5189	7.1082	1.253	0.6897
TCGA-S9-A7J3	629	0	2	FEMALE	Oligodendroglioma	52	Left	G3	Mutant	codel	Methylated	NA	WT	YES	YES	Response	Non-response	2.0966	3.1175	1.3005	0.9295	0.8492	0.8327	0.9945	1.389	1.2634	0.9132	0.9105	4.9668	1.2927	5.3123	1.0947	0.9481	6.9175	2.1255	1.5013	1.0805	1.7076	1.522	2.8918	0.0127	0.0678	0.5177	1.5609	0.5255	2.1268	1.1794
TCGA-S9-A7QW	458	0	2	FEMALE	Astrocytoma	54	Left	G3	Mutant	non-codel	Methylated	NA	Mutant	YES	YES	Response	Non-response	0.3771	0.8226	0.2365	1.1245	1.0272	0.9959	1.1999	0.9485	1.4771	1.0877	1.0963	0.0093	1.5599	0.0151	1.3242	1.1469	8.3681	2.5727	1.8162	1.307	2.0659	0.6305	3.4983	0.0022	0.021	1.4025	1.9223	0.1432	2.5918	1.4267
TCGA-S9-A7QX	564	0	1	FEMALE	Astrocytoma	36	Right	G3	Mutant	non-codel	Methylated	NA	Mutant	YES	YES	Response	Non-response	1.2263	1.8234	1.4383	0.5437	0.4968	0.4886	0.5873	0.9149	0.7505	0.5341	0.5288	2.9058	0.7561	10.2291	0.6403	0.5545	4.0464	1.2482	0.8781	0.632	0.9989	1.5562	1.6915	17.4901	0.9023	3.3706	5.5167	7.1087	1.2532	0.6898
TCGA-S9-A7QY	863	0	1	FEMALE	Oligoastrocytoma	35	Left	G2	Mutant	codel	Methylated	NA	WT	YES	NA	Response	Non-response	1.226	1.8229	1.4379	0.5435	0.4966	0.4889	0.5873	0.9146	0.7503	0.534	0.5324	2.905	0.7559	10.2263	0.6401	0.5544	4.0453	1.2479	0.8779	0.6318	0.9986	1.558	1.691	17.472	0.9021	3.3687	5.5188	7.1067	1.2529	0.6896
TCGA-S9-A7QZ	826	0	1	MALE	Oligodendroglioma	41	Left	G2	Mutant	codel	Methylated	NA	WT	NA	NA	Response	Response	1.229	1.8275	1.4415	0.5449	0.4978	0.49	0.5855	0.9169	0.7397	0.5353	0.5337	2.9123	0.7578	10.2518	0.6417	0.5558	4.0554	1.251	0.8801	0.6334	1.0011	1.5365	1.6952	17.5253	0.8705	3.3207	5.4346	7.105	1.256	0.6913
TCGA-S9-A7R1	5166	1	1	MALE	Oligodendroglioma	35	Midline	G2	Mutant	codel	Methylated	NA	WT	YES	YES	Response	NA	1.2279	1.8258	1.4402	0.5444	0.4974	0.4892	0.5886	0.916	0.7515	0.5348	0.5332	2.9096	0.7571	10.2423	0.6411	0.5553	4.0517	1.2499	0.8793	0.6328	1.0002	1.5427	1.6937	17.3793	0.9035	3.3591	5.5231	7.1179	1.2548	0.6907
TCGA-S9-A7R2	316	1	2	MALE	Astrocytoma	69	Left	G3	WT	non-codel	Unmethylated	NA	WT	NA	YES	NA	NA	0.4889	0.3945	0.0888	1.479	1.3513	1.3177	1.5648	0.1651	1.9524	1.2588	1.4331	0.0039	1.887	0.0228	1.6334	0.9076	1.7903	3.2911	0.0495	1.714	0.0121	0.2733	0.0011	0.0087	0.0932	0.0088	0.008	0.1648	0.0003	1.8763
TCGA-S9-A7R3	3013	0	1	FEMALE	Astrocytoma	28	Left	G2	Mutant	non-codel	Methylated	NA	WT	NA	NA	Response	Non-response	1.2261	1.8232	1.4381	0.5436	0.4967	0.4882	0.5879	0.9147	0.7503	0.5341	0.5325	2.9054	0.756	10.2275	0.6402	0.5545	4.0458	1.248	0.878	0.6319	0.9988	1.5591	1.6912	17.468	0.8993	3.3701	5.5191	7.1079	1.253	0.6897
TCGA-S9-A7R4	914	0	1	MALE	Astrocytoma	46	Left	G3	Mutant	non-codel	Methylated	NA	WT	YES	YES	Response	NA	1.2257	1.8225	1.4376	0.5434	0.4965	0.4891	0.5877	0.9144	0.7501	0.5339	0.5323	2.9044	0.7558	10.224	0.64	0.5543	4.0444	1.2476	0.8777	0.6317	0.9984	1.5585	1.6907	17.4811	0.9019	3.369	5.5175	7.1041	1.2526	0.6895
TCGA-S9-A7R7	3000	0	2	MALE	Astrocytoma	27	Left	G2	Mutant	non-codel	Methylated	NA	Mutant	YES	YES	Non-response	Non-response	2.0581	3.0237	0.6356	0.9133	0.8345	0.8196	0.9778	1.5367	1.226	0.8972	0.8946	0.9441	1.2702	0.1237	1.0746	0.9316	6.7976	2.0969	1.4752	1.0617	1.6781	1.5464	2.8415	0.0059	0.0213	4.625	8.9675	0.1587	2.1052	1.1588
TCGA-S9-A7R8	961	1	1	FEMALE	Astrocytoma	44	Right	G3	Mutant	non-codel	Methylated	NA	Mutant	YES	YES	NA	NA	1.2258	1.8227	1.4377	0.5435	0.4966	0.4887	0.5877	0.9145	0.7502	0.5339	0.5323	2.9046	0.7558	10.2247	0.64	0.5543	4.0447	1.2477	0.8778	0.6318	0.9985	1.5586	1.6908	17.4836	0.902	3.3692	5.5179	7.106	1.2527	0.6895
TCGA-S9-A89V	569	0	1	MALE	Astrocytoma	70	Right	G3	WT	non-codel	Methylated	NA	Mutant	YES	YES	Non-response	NA	1.7882	2.6589	2.0194	0.7928	0.7244	0.7133	0.8288	1.0574	1.0943	0.7789	0.7751	4.2373	1.1026	14.916	0.9337	0.8086	5.9	1.8187	1.2805	0.9216	0.8441	1.7632	2.0451	7.4902	0.0659	0.0244	0.1016	0.4838	0.0056	1.0059
TCGA-S9-A89Z	623	0	1	MALE	Astrocytoma	40	Right	G3	Mutant	non-codel	Methylated	NA	WT	YES	YES	Response	Non-response	1.6556	2.4618	1.9418	0.734	0.6707	0.6594	0.7924	1.235	1.0127	0.7211	0.6939	3.9231	1.0208	13.808	0.8645	0.7487	5.463	1.6852	1.1856	0.8533	1.3486	1.9753	2.2833	4.7851	0.0166	1.8717	1.2595	4.7458	1.4401	0.9313
TCGA-TM-A7C3	1666	1	2	FEMALE	Astrocytoma	43	Left	G3	WT	non-codel	Methylated	NA	WT	YES	YES	Response	Non-response	0.0978	0.0273	2.563	0.9861	0.901	0.8868	1.0649	1.6593	1.3183	0.9688	0.9579	0.0107	0.2805	0.0116	1.1613	1.0058	7.339	2.2639	1.5927	1.1463	1.8117	2.1596	3.0679	0.1849	0.0223	3.721	7.7592	0.3571	2.2729	1.2219
TCGA-TM-A7C4	1470	0	2	FEMALE	Astrocytoma	39	Right	G2	Mutant	non-codel	Methylated	NA	Mutant	NA	NA	Response	Response	0.3466	0.1314	2.0861	0.7886	0.7205	0.7075	0.8528	1.3269	1.0662	0.7747	0.7723	4.2061	1.0958	0.0415	0.9287	0.8043	5.869	1.8105	1.2737	0.9167	1.4488	2.2494	2.4534	0.0152	0.4178	4.8777	7.9519	10.3105	1.8176	1.0005
TCGA-TM-A7C5	1500	0	1	MALE	Oligoastrocytoma	30	Left	G2	Mutant	codel	Methylated	NA	WT	NA	YES	Response	Response	1.2312	1.8306	1.444	0.5458	0.4986	0.4897	0.5903	0.9185	0.7518	0.5362	0.5187	2.9173	0.7591	10.2695	0.6428	0.5567	4.0624	1.2532	0.8816	0.6345	1.0029	1.5627	1.6982	17.492	0.9056	3.3839	5.5363	6.8237	1.2581	0.6925
TCGA-TM-A7CA	1058	0	1	MALE	Astrocytoma	44	Left	G2	Mutant	non-codel	Methylated	NA	Mutant	NA	NA	Response	Response	1.9694	2.9283	0.0977	0.8731	0.7978	0.7822	0.9336	0.5728	1.2039	0.8255	0.8553	4.6666	1.2143	16.4128	1.0281	0.8906	6.4966	2.0045	1.4085	1.0148	1.5109	0.4542	0.097	4.3079	0.0179	0.1196	0.0283	0.061	0.0598	1.1078
TCGA-TM-A7CF	1989	0	1	FEMALE	Astrocytoma	41	Right	G2	Mutant	non-codel	Methylated	WT	WT	NA	NA	Response	Non-response	1.2277	1.8254	1.4398	0.5443	0.4973	0.4884	0.5886	0.9158	0.7511	0.5347	0.5331	2.909	0.7569	10.2401	0.641	0.5551	4.0508	1.2496	0.8791	0.6327	1	1.5609	1.6933	17.5075	0.8937	3.3743	5.5237	6.9808	1.2545	0.6906
TCGA-TM-A84B	758	1	1	MALE	Astrocytoma	40	Left	G3	WT	non-codel	Unmethylated	NA	WT	YES	NA	Non-response	Non-response	1.2896	1.9175	1.5125	0.5717	0.5224	0.5139	0.6183	0.962	0.7889	0.5617	0.5599	3.0557	0.7951	10.7565	0.6733	0.5831	4.2551	1.3126	0.9234	0.6646	1.0504	1.6364	1.7787	13.2647	0.9006	3.538	5.7977	7.4654	1.3178	0.7254
TCGA-TM-A84C	492	1	1	MALE	Astrocytoma	32	Midline	G2	WT	non-codel	Unmethylated	NA	WT	YES	NA	Non-response	Non-response	1.4812	2.2025	1.7373	0.6567	0.6	0.5845	0.7013	1.105	0.9048	0.6452	0.6433	3.5098	0.9133	12.3553	0.7734	0.6698	4.8476	1.5049	1.0607	0.7634	1.2065	1.8834	2.0431	0.7767	0.8417	4.0713	6.6304	8.5841	1.5099	0.8332
TCGA-TM-A84F	1796	0	1	MALE	Astrocytoma	48	Right	G3	Mutant	non-codel	Methylated	NA	WT	NA	YES	Response	Response	1.2523	1.8621	1.4688	0.5552	0.5073	0.4995	0.6001	0.9339	0.7659	0.5455	0.5439	2.9674	0.7722	10.446	0.6539	0.5663	4.1323	1.2746	0.8968	0.6454	1.0201	1.4901	1.7274	17.6027	0.8884	3.4325	5.6098	5.5332	1.2798	0.7044
TCGA-TM-A84G	1236	0	1	FEMALE	Oligodendroglioma	54	Right	G3	Mutant	codel	Methylated	NA	WT	NA	YES	Response	Response	1.2263	1.8234	1.4382	0.5437	0.4968	0.4894	0.5879	0.9148	0.7505	0.5341	0.5322	2.9057	0.7561	10.2287	0.6403	0.5545	4.0463	1.2482	0.8781	0.632	0.9989	1.5583	1.6914	17.4919	0.9023	3.369	5.5197	7.0635	1.2531	0.6898
TCGA-TM-A84H	926	0	1	FEMALE	Oligoastrocytoma	44	Right	G3	Mutant	non-codel	Methylated	NA	Mutant	NA	YES	Response	Response	1.2669	1.8838	1.4859	0.5617	0.5132	0.5042	0.6055	0.9451	0.7751	0.5518	0.5501	3.002	0.7811	10.5675	0.6615	0.5729	4.1803	1.2895	0.9072	0.6529	1.032	1.6072	1.7475	15.8351	0.01	3.464	5.6892	7.1917	1.2947	0.7126
TCGA-TM-A84I	854	0	1	MALE	Astrocytoma	30	Left	G3	Mutant	non-codel	Methylated	NA	Mutant	NA	YES	Response	Response	1.3404	1.993	1.572	0.5942	0.543	0.5332	0.6412	0.9999	0.8202	0.5838	0.582	3.176	0.8264	11.1802	0.6999	0.6061	4.4227	1.3643	0.9598	0.6908	1.0918	1.5608	1.8487	19.1132	0.008	1.5648	1.2118	6.5381	1.332	0.754
TCGA-TM-A84J	735	0	1	MALE	Oligodendroglioma	63	Left	G3	WT	non-codel	Unmethylated	NA	WT	YES	YES	Non-response	Non-response	1.2263	1.8234	1.4383	0.5437	0.4968	0.4888	0.588	0.9148	0.7505	0.5341	0.5325	2.9058	0.7561	10.2288	0.6403	0.5545	4.0464	1.2482	0.8781	0.632	0.9989	1.5572	1.6915	17.4731	0.9022	3.3697	5.5165	7.0837	1.2532	0.6898
TCGA-TM-A84L	1242	1	1	MALE	Oligoastrocytoma	31	Left	G2	Mutant	non-codel	Methylated	NA	Mutant	YES	YES	Response	Non-response	1.2259	1.8229	1.4378	0.5435	0.4966	0.4885	0.5868	0.914	0.7503	0.534	0.5324	2.9049	0.7559	10.2259	0.6401	0.5544	4.0452	1.2478	0.8779	0.6318	0.9986	1.5554	1.691	17.4867	0.9021	3.362	5.5185	7.1068	1.2528	0.6896
TCGA-TM-A84M	754	0	1	MALE	Oligodendroglioma	40	Right	G3	Mutant	codel	Methylated	NA	WT	YES	YES	Response	Response	1.5091	2.2439	1.7699	0.6691	0.6113	0.602	0.7236	1.1258	0.9216	0.6573	0.6554	3.5759	0.9305	12.5285	0.788	0.6824	4.9795	1.5361	1.0806	0.7778	1.2292	1.9156	2.0815	0.5661	0.0212	4.1479	6.7764	7.7572	1.5422	0.8489
TCGA-TM-A84O	1011	1	1	FEMALE	Oligodendroglioma	61	Right	G3	Mutant	codel	Methylated	NA	WT	NA	YES	Response	Non-response	1.2987	1.9311	1.5232	0.5758	0.5261	0.5171	0.6181	0.9689	0.7948	0.5657	0.5639	3.0774	0.8008	10.8329	0.6781	0.5873	4.2853	1.3219	0.93	0.6693	1.0579	1.6416	1.7913	18.3327	0.0408	3.4909	5.7278	2.9125	1.3272	0.7305
TCGA-TM-A84Q	772	0	1	MALE	Astrocytoma	31	Left	G2	Mutant	non-codel	Methylated	NA	Mutant	NA	YES	Response	Response	1.226	1.8229	1.4379	0.5435	0.4966	0.4884	0.5852	0.9145	0.7502	0.534	0.5324	2.905	0.7559	10.2263	0.6401	0.5544	4.0454	1.2478	0.8779	0.6319	0.9986	1.5571	1.691	17.4875	0.9021	3.357	5.5181	7.1071	1.2529	0.6896
TCGA-TM-A84R	566	0	1	MALE	Oligodendroglioma	46	Left	G2	Mutant	codel	Methylated	NA	WT	NA	NA	Response	Response	1.2429	1.848	1.4577	0.551	0.5035	0.4959	0.5959	0.9272	0.7606	0.5413	0.5397	2.945	0.7663	10.3671	0.649	0.562	4.101	1.2651	0.89	0.6405	1.0124	1.5686	1.7143	17.7242	0.7871	3.4126	5.5059	6.0476	1.2701	0.6991
TCGA-TM-A84S	454	0	1	MALE	Oligodendroglioma	36	Left	G3	Mutant	codel	Methylated	NA	WT	NA	NA	Response	Response	1.2455	1.852	1.4608	0.5522	0.5046	0.4962	0.5972	0.9292	0.7622	0.5425	0.5409	2.9513	0.768	10.3893	0.6503	0.5632	4.1098	1.2678	0.8919	0.6419	1.0146	1.5059	1.718	17.5437	0.0137	3.423	5.2569	7.1631	1.2728	0.7006
TCGA-TM-A84T	724	0	1	MALE	Oligoastrocytoma	19	Left	G2	Mutant	non-codel	Methylated	NA	Mutant	NA	NA	Non-response	Non-response	1.2276	1.8254	1.4398	0.5443	0.4973	0.4886	0.5872	0.9157	0.7513	0.5347	0.5331	2.9089	0.7569	10.2399	0.641	0.5551	4.0507	1.2496	0.8791	0.6327	1	1.5494	1.6933	17.4924	0.9033	3.2631	5.5225	7.1151	1.2545	0.6905
TCGA-TQ-A7RF	650	0	1	FEMALE	Oligodendroglioma	27	Right	G3	Mutant	non-codel	Unmethylated	NA	WT	NA	NA	Response	NA	1.2277	1.8255	1.44	0.5443	0.4974	0.4896	0.5887	0.9159	0.7514	0.5348	0.5332	2.9092	0.757	10.2409	0.6411	0.5552	4.0511	1.2497	0.8792	0.6328	1.0001	1.5425	1.6934	17.4973	0.8015	3.3745	5.5187	7.0949	1.2546	0.6906
TCGA-TQ-A7RG	599	0	1	MALE	Oligoastrocytoma	36	Left	G2	Mutant	codel	Methylated	NA	WT	NA	NA	Response	NA	1.2594	1.8726	1.4771	0.5584	0.5102	0.502	0.6018	0.9383	0.7707	0.5485	0.5469	2.9842	0.7765	10.5049	0.6576	0.5695	4.1556	1.2819	0.9018	0.6491	1.0258	1.5986	1.7371	17.1885	0.0201	3.445	5.63	6.3154	1.287	0.7084
TCGA-TQ-A7RH	486	0	1	MALE	Oligoastrocytoma	39	Right	G2	Mutant	non-codel	Methylated	NA	Mutant	NA	NA	Response	NA	1.466	2.1799	1.7194	0.65	0.5939	0.5851	0.7022	1.0936	0.8962	0.6385	0.6366	3.4738	0.9039	12.1745	0.7655	0.6629	4.8374	1.4922	1.0498	0.7556	1.1942	1.8545	2.0221	2.5845	0.0315	3.997	6.5869	8.3887	1.4982	0.8247
TCGA-TQ-A7RI	62	0	1	FEMALE	Oligodendroglioma	37	Left	G2	Mutant	codel	Methylated	NA	WT	NA	NA	NA	NA	1.8275	2.7174	2.1417	0.8102	0.7403	0.7281	0.8746	1.3616	1.1126	0.796	0.7936	4.3304	1.1268	15.0405	0.9542	0.8264	6.0302	1.8602	1.3087	0.9419	1.4886	1.3107	2.5204	0.6351	0.0646	1.0239	0.4674	1.4708	1.8573	1.028
TCGA-TQ-A7RJ	1229	0	1	FEMALE	Oligoastrocytoma	25	Left	G2	Mutant	non-codel	Methylated	NA	Mutant	NA	NA	Non-response	NA	1.2258	1.8226	1.4377	0.5435	0.4966	0.4886	0.5877	0.9145	0.7502	0.5339	0.5323	2.9045	0.7558	10.2245	0.64	0.5543	4.0447	1.2477	0.8778	0.6317	0.9985	1.5569	1.6907	17.4852	0.9019	3.3687	5.5175	7.1026	1.2526	0.6895
TCGA-TQ-A7RK	1341	0	1	MALE	Oligoastrocytoma	29	Left	G2	Mutant	non-codel	Methylated	WT	Mutant	NA	NA	Response	Response	1.2286	1.8269	1.441	0.5447	0.4977	0.49	0.5886	0.9166	0.7519	0.5351	0.5336	2.9113	0.7575	10.2483	0.6415	0.5556	4.054	1.2506	0.8798	0.6332	1.0008	1.5615	1.6947	17.525	0.9041	3.1462	5.5288	7.1195	1.2555	0.6911
TCGA-TQ-A7RM	1116	0	1	FEMALE	Oligoastrocytoma	41	Left	G3	Mutant	non-codel	Methylated	NA	WT	NA	NA	Response	Response	1.2777	1.8999	1.4986	0.5665	0.5176	0.5086	0.6126	0.9532	0.7818	0.5565	0.5549	3.0276	0.7878	10.6579	0.6672	0.5778	4.2161	1.3006	0.915	0.6585	1.0408	1.6224	1.7624	15.8115	0.0374	3.4455	5.0821	7.221	1.3057	0.7187
TCGA-TQ-A7RN	1026	0	1	MALE	Oligodendroglioma	32	Left	G2	Mutant	codel	Methylated	NA	WT	NA	NA	Response	Response	1.2337	1.8344	1.447	0.547	0.4998	0.4918	0.5915	0.9204	0.755	0.5374	0.5358	2.9234	0.7607	10.2908	0.6442	0.5579	4.0709	1.2558	0.8834	0.6358	1.0049	1.5629	1.7017	17.5938	0.9077	3.3881	5.5481	6.5181	1.2608	0.694
TCGA-TQ-A7RO	949	0	1	MALE	Oligoastrocytoma	29	Left	G2	Mutant	codel	Methylated	NA	WT	NA	NA	Response	Response	1.351	2.0088	1.5845	0.599	0.5473	0.5385	0.6477	1.0079	0.8262	0.5885	0.5867	3.2013	0.833	11.2688	0.7054	0.6109	4.4579	1.3752	0.9674	0.6963	1.1005	1.7044	1.8635	10.756	0.029	3.6626	6.0638	7.1766	1.3806	0.76
TCGA-TQ-A7RP	914	0	1	MALE	Oligoastrocytoma	66	Left	G2	WT	non-codel	Methylated	NA	WT	NA	NA	Response	Response	1.2495	1.8579	1.4655	0.554	0.5062	0.4972	0.5977	0.9321	0.7643	0.5442	0.5426	2.9607	0.7704	10.4223	0.6524	0.565	4.1229	1.2718	0.8947	0.644	1.0178	1.5723	1.7235	17.7294	0.2616	2.3052	5.5978	7.2386	1.2769	0.7029
TCGA-TQ-A7RQ	795	0	1	FEMALE	Oligodendroglioma	38	Left	G2	Mutant	codel	Methylated	NA	WT	NA	NA	Response	Response	1.4416	2.1435	1.6908	0.6391	0.584	0.5736	0.6904	1.0752	0.882	0.6279	0.626	3.4159	0.8889	12.0242	0.7527	0.6519	4.7567	1.4673	1.0323	0.743	1.1743	1.4094	1.9884	16.4795	0.0386	1.2942	4.2255	1.2163	1.4732	0.8109
TCGA-TQ-A7RR	787	0	1	MALE	Oligoastrocytoma	38	Right	G2	Mutant	non-codel	Unmethylated	NA	Mutant	NA	NA	Response	Response	1.3074	1.944	1.5334	0.5796	0.5296	0.5212	0.6267	0.9753	0.7994	0.5694	0.5678	3.0979	0.8061	10.9038	0.6827	0.5912	4.314	1.3308	0.9362	0.6738	1.065	1.657	1.8033	12.8886	0.3388	3.3384	5.8741	7.5725	1.336	0.7354
TCGA-TQ-A7RU	1032	0	1	MALE	Oligodendroglioma	51	Left	G2	Mutant	codel	Methylated	NA	WT	NA	NA	Response	Response	1.2259	1.8228	1.4378	0.5435	0.4966	0.4886	0.5878	0.9145	0.7502	0.5339	0.5324	2.9048	0.7559	10.2254	0.6401	0.5543	4.045	1.2478	0.8778	0.6318	0.9986	1.5565	1.6909	17.4756	0.902	3.3694	5.5183	7.1061	1.2527	0.6896
TCGA-TQ-A7RV	1868	0	1	MALE	Astrocytoma	27	Left	G2	Mutant	non-codel	Methylated	WT	Mutant	NA	NA	Response	Non-response	1.2368	1.839	1.4506	0.5483	0.501	0.4933	0.5926	0.9226	0.7569	0.5387	0.5371	2.9306	0.7626	10.3165	0.6458	0.5593	4.081	1.2589	0.8857	0.6374	1.0074	1.5693	1.7059	17.4007	0.469	3.2231	5.5511	7.1458	1.2639	0.6957
TCGA-TQ-A7RW	821	1	1	MALE	Oligodendroglioma	32	Left	G2	Mutant	non-codel	Methylated	NA	WT	NA	NA	Non-response	Non-response	1.3634	2.0272	1.599	0.6044	0.5523	0.5422	0.6521	1.017	0.8339	0.5938	0.5921	3.2305	0.8406	11.3721	0.7119	0.6165	4.4986	1.3877	0.9763	0.7026	1.1105	1.0803	1.8805	16.3	0.034	0.7498	4.5885	6.0125	1.3932	0.7669
TCGA-TQ-A8XE	954	1	1	FEMALE	Oligodendroglioma	42	Left	G2	Mutant	non-codel	Methylated	WT	WT	NA	NA	Response	Non-response	1.327	1.9732	1.5564	0.5883	0.5376	0.529	0.6356	0.99	0.8121	0.578	0.5763	3.1444	0.8182	11.069	0.6929	0.6001	4.3787	1.3507	0.9503	0.6839	1.0809	1.6593	1.8304	18.9032	0.0517	1.3798	5.5331	3.115	1.3561	0.7465
TCGA-VM-A8C8	1397	0	1	FEMALE	Oligodendroglioma	50	Right	G2	Mutant	non-codel	Unmethylated	NA	Mutant	YES	YES	NA	Non-response	1.4939	2.2213	1.7522	0.6623	0.6052	0.5957	0.7162	1.1145	0.9123	0.6507	0.6488	3.5399	0.9211	12.3519	0.7801	0.6756	4.9295	1.5206	1.0698	0.7699	1.2169	1.8919	2.0606	0.8859	0.0106	4.0342	6.647	8.5623	1.5267	0.8404
TCGA-VM-A8C9	1314	0	1	FEMALE	Astrocytoma	37	Left	G2	WT	non-codel	Unmethylated	NA	WT	NA	NA	Response	Response	1.2257	1.8225	1.4375	0.5434	0.4965	0.489	0.5877	0.9144	0.7501	0.5339	0.5323	2.9043	0.7557	10.2236	0.64	0.5542	4.0443	1.2476	0.8777	0.6317	0.9984	1.5585	1.6906	17.4828	0.9019	3.3688	5.5166	7.1052	1.2525	0.6894
TCGA-VM-A8CA	411	0	1	MALE	Oligodendroglioma	54	Left	G2	Mutant	non-codel	Methylated	NA	WT	YES	NA	NA	NA	1.2257	1.8225	1.4376	0.5434	0.4965	0.489	0.5877	0.9144	0.7501	0.5339	0.5323	2.9043	0.7557	10.2239	0.64	0.5543	4.0444	1.2476	0.8777	0.6317	0.9984	1.5585	1.6906	17.4815	0.9019	3.3681	5.5174	7.1054	1.2526	0.6895
TCGA-VM-A8CB	3	0	1	MALE	Oligodendroglioma	33	Left	G3	Mutant	codel	Methylated	NA	WT	NA	NA	NA	NA	1.2257	1.8224	1.4375	0.5434	0.4965	0.4891	0.5877	0.9144	0.7501	0.5338	0.5323	2.9042	0.7557	10.2235	0.64	0.5542	4.0442	1.2476	0.8777	0.6317	0.9984	1.5585	1.6906	17.4834	0.9019	3.3688	5.5169	7.1051	1.2525	0.6894
TCGA-VM-A8CD	240	1	1	MALE	Astrocytoma	58	Right	G3	WT	non-codel	Unmethylated	NA	WT	NA	YES	NA	NA	1.2259	1.8228	1.4378	0.5435	0.4966	0.4892	0.5878	0.9146	0.7502	0.534	0.5324	2.9049	0.7559	10.2258	0.6401	0.5544	4.0452	1.2478	0.8779	0.6318	0.9986	1.5586	1.691	17.4719	0.9014	3.3696	5.5138	7.1053	1.2528	0.6896
TCGA-VM-A8CE	1191	0	1	MALE	Oligodendroglioma	25	Left	G2	Mutant	codel	Methylated	NA	WT	YES	YES	NA	NA	1.2262	1.8232	1.4381	0.5436	0.4967	0.4894	0.5879	0.9148	0.7499	0.5341	0.5325	2.9055	0.7561	10.2281	0.6403	0.5545	4.046	1.2481	0.8781	0.632	0.9988	1.5589	1.6913	17.4635	0.9	3.37	5.5118	7.1083	1.2531	0.6897
TCGA-VM-A8CF	609	0	1	FEMALE	Astrocytoma	44	Left	G3	Mutant	non-codel	Methylated	NA	Mutant	YES	YES	NA	Non-response	1.2257	1.8225	1.4376	0.5434	0.4965	0.4892	0.5877	0.9144	0.7501	0.5339	0.5323	2.9044	0.7558	10.2241	0.64	0.5543	4.0445	1.2476	0.8777	0.6317	0.9984	1.5576	1.6907	17.4848	0.9019	3.3652	5.5176	7.1052	1.2526	0.6895
TCGA-VM-A8CH	714	0	1	FEMALE	Astrocytoma	24	Right	G2	Mutant	non-codel	Unmethylated	NA	Mutant	NA	NA	Response	NA	1.2855	1.9114	1.5077	0.5699	0.5208	0.513	0.6164	0.959	0.7866	0.5599	0.5583	3.0461	0.7926	10.7227	0.6712	0.5813	4.2417	1.3085	0.9205	0.6625	1.0471	1.6288	1.7731	14.4874	0.016	3.533	5.6948	7.4487	1.3137	0.7231
TCGA-VV-A829	1127	0	1	MALE	Oligoastrocytoma	44	Left	G3	Mutant	codel	Methylated	NA	WT	YES	YES	Non-response	Response	1.2257	1.8225	1.4376	0.5434	0.4965	0.489	0.5877	0.9144	0.7501	0.5339	0.5323	2.9044	0.7557	10.2239	0.64	0.5543	4.0444	1.2476	0.8777	0.6317	0.9984	1.5584	1.6906	17.4816	0.9019	3.3689	5.5175	7.1047	1.2526	0.6895
TCGA-VV-A86M	487	0	1	FEMALE	Astrocytoma	36	Left	G3	Mutant	non-codel	Methylated	NA	WT	YES	YES	NA	Response	1.5538	2.3104	1.8224	0.6889	0.6295	0.6177	0.745	1.1592	0.9488	0.6768	0.6696	3.6819	0.9581	12.7834	0.8113	0.7026	5.1271	1.5816	1.1127	0.8008	1.2657	1.9611	2.1432	0.3719	0.0612	4.2345	6.8498	5.5226	1.5879	0.874
TCGA-W9-A837	1553	0	1	MALE	Oligodendroglioma	47	Right	G2	Mutant	codel	Methylated	NA	WT	NA	NA	Non-response	Non-response	1.4447	2.1481	1.6944	0.6405	0.5852	0.5758	0.6925	1.0778	0.8816	0.6292	0.6274	3.4232	0.8908	12.0432	0.7543	0.6533	4.7669	1.4705	1.0345	0.7446	1.1768	1.7989	1.9927	4.4293	0.139	3.9601	6.3026	7.8814	1.4763	0.8126
TCGA-WH-A86K	405	0	1	MALE	Astrocytoma	65	Right	G2	Mutant	non-codel	Methylated	NA	WT	YES	YES	Non-response	Non-response	1.5142	2.2514	1.7238	0.6713	0.6134	0.6031	0.7224	1.1296	0.9235	0.6595	0.6574	3.5879	0.9336	12.6301	0.7906	0.6847	4.9962	1.5412	1.0843	0.7804	1.2334	0.9737	2.0885	8.7036	0.0301	4.0619	6.6696	0.5166	1.5474	0.8517
TCGA-WY-A858	1337	0	1	FEMALE	Astrocytoma	32	Left	G3	Mutant	non-codel	Methylated	NA	Mutant	NA	NA	NA	NA	1.3596	2.0216	1.5946	0.6028	0.5508	0.5425	0.6519	1.0143	0.8284	0.5922	0.5896	3.2216	0.8383	11.3363	0.7099	0.6148	4.4862	1.3839	0.9736	0.7007	1.1075	1.7258	1.8753	9.4236	0.1339	3.7369	6.1134	7.8179	1.3894	0.7648
TCGA-WY-A859	1213	0	1	FEMALE	Astrocytoma	34	Left	G2	Mutant	non-codel	Methylated	NA	WT	NA	NA	NA	NA	1.226	1.8229	1.4379	0.5435	0.4966	0.4889	0.5878	0.9146	0.7503	0.534	0.5324	2.905	0.7559	10.2263	0.6401	0.5544	4.0453	1.2479	0.8779	0.6318	0.9986	1.557	1.691	17.4781	0.9019	3.3675	5.5187	7.1067	1.2529	0.6896
TCGA-WY-A85A	1320	0	1	MALE	Astrocytoma	20	Right	G2	Mutant	non-codel	Methylated	NA	Mutant	NA	NA	NA	NA	1.4563	2.1654	1.7081	0.6457	0.59	0.5807	0.6982	1.0865	0.8904	0.6343	0.6315	3.4509	0.8979	12.1298	0.7604	0.6586	4.8054	1.4824	1.0429	0.7506	1.1863	1.8486	2.0088	2.9042	0.2034	4.0004	6.5523	8.3998	1.4883	0.8192
TCGA-WY-A85B	1393	0	1	MALE	Astrocytoma	24	Right	G2	Mutant	non-codel	Methylated	NA	Mutant	NA	NA	Response	NA	1.2995	1.9323	1.5242	0.5762	0.5263	0.5172	0.6189	0.9692	0.7944	0.566	0.5642	3.0793	0.8013	10.8238	0.6785	0.5876	4.288	1.3228	0.9306	0.6698	1.0585	1.6019	1.7925	16.5141	0.004	2.2715	5.3653	6.5826	1.328	0.731
TCGA-WY-A85C	1426	0	1	MALE	Astrocytoma	36	Right	G2	Mutant	non-codel	Methylated	NA	WT	NA	NA	Non-response	Non-response	1.6629	2.4725	1.9503	0.7372	0.6736	0.6609	0.7928	1.2334	1.0078	0.7243	0.7216	3.9403	1.0253	13.8281	0.8683	0.7519	5.4869	1.6874	1.1908	0.857	1.3545	1.9812	2.2933	0.8418	0.0035	0.7806	0.9027	8.8122	1.6901	0.9354
TCGA-WY-A85D	1147	0	1	MALE	Oligoastrocytoma	60	Right	G2	Mutant	non-codel	Unmethylated	NA	Mutant	NA	NA	NA	NA	1.5491	2.3034	1.8169	0.6868	0.6275	0.6152	0.7332	1.152	0.9473	0.6747	0.6727	3.6707	0.9552	12.9189	0.8089	0.7005	5.1115	1.5766	1.1093	0.7984	1.2618	1.8911	2.1366	4.9337	0.0124	1.0321	2.6838	8.7947	1.5695	0.8714
TCGA-WY-A85E	633	0	1	FEMALE	Oligoastrocytoma	48	Left	G2	Mutant	non-codel	Methylated	NA	Mutant	NA	NA	Response	Non-response	1.4539	2.1618	1.7052	0.6446	0.589	0.5799	0.6971	1.0846	0.8879	0.6333	0.6308	3.4451	0.8965	12.1169	0.7592	0.6575	4.7974	1.4799	1.0411	0.7493	1.1843	1.8464	2.0054	3.1894	0.0241	3.9962	6.5409	8.428	1.4858	0.8178
