# Supplementary material for: Clinical Significance and Molecular Annotation of Cellular Morphometric Subtypes in Lower Grade Gliomas discovered by Machine Learning: a retrospective multicentric study
Source: Research Square preprint supplement (doi:10.21203/rs.3.rs-770415/v1), 2021-08-12
Supplement: Supplementary file 8 [file 96e9a1667c88c1d840977a36.docx]

**Supplementary Table 13. Cox proportional hazards regression model on the overall survival of patients in TCGA-LGG cohort**

| **Variable** | Univariate analysis | | | |  | Multivariable analysis | | | |
| --- | --- | --- | --- | --- | --- | --- | --- | --- | --- |
| HR | LCI | UCI | P value |  | HR | LCI | UCI | P value |
| Subtype 2 vs 1 | 1.92 | 1.29 | 2.87 | 0.001 |  | 1.773 | 1.066 | 2.947 | 0.027 |
| Age | 1.06 | 1.04 | 1.07 | <0.001 |  | 1.058 | 1.038 | 1.079 | <0.001 |
| Male vs Female | 1.08 | 0.741 | 1.56 | 0.703 |  | 2.645 | 1.408 | 4.968 | 0.002 |
| Oligoastrocytoma vs Astrocytoma | 0.631 | 0.389 | 1.02 | 0.062 |  | NA | | | |
| Oligodendroglioma vs Astrocytoma | 0.58 | 0.38 | 0.884 | 0.011 |  |
| Grade | 3.38 | 2.24 | 5.09 | <0.001 |  | NA | | | |
| IDH status Wild type vs Mutant | 6.93 | 4.7 | 10.2 | <0.001 |  | 6.987 | 3.525 | 13.851 | <0.001 |
| 1p.19q.codeletion non-codeletion vs codeletion | 2.68 | 1.62 | 4.44 | <0.001 |  | NA | | | |
| TERT promoter status Wild type vs Mutant | 0.54 | 0.329 | 0.886 | 0.015 |  | NA | | | |
| ATRX status Wild type vs Mutant | 1.43 | 0.969 | 2.12 | 0.072 |  | 0.57 | 0.293 | 1.109 | 0.098 |
| Laterality Midline vs Left | 1.17 | 0.348 | 3.96 | 0.797 |  | NA | | | |
| Laterality Right vs Left | 0.814 | 0.557 | 1.19 | 0.287 |  |

**Abbreviations:** HR, hazards ratio; LCI, lower limit of 95% confidence interval; UCI, upper limit of 95% confidence interval
