# Supplementary material for: Clinical Significance and Molecular Annotation of Cellular Morphometric Subtypes in Lower Grade Gliomas discovered by Machine Learning: a retrospective multicentric study
Source: Research Square preprint supplement (doi:10.21203/rs.3.rs-770415/v1), 2021-08-12
Supplement: Supplementary file 9 [file 98989826830a29833e829bec.docx]

**Supplementary Table 14. Cox proportional hazards regression model on the overall survival of patients in ZN-LGG cohort**

| Variables | Univariate analysis | | | |  | Multivariate analysis | | | |
| --- | --- | --- | --- | --- | --- | --- | --- | --- | --- |
|  | HR | LCI | UCI | P value |  | HR | LCI | UCI | P value |
| Subtype 2 vs 1 | 3.932 | 1.06 | 14.595 | 0.041 |  | 4.776 | 1.29 | 17.686 | 0.019 |
| Grade | 15.64 | 2.016 | 121.337 | 0.009 |  | 17.942 | 2.307 | 139.556 | 0.006 |
| Age | 1.049 | 0.997 | 1.104 | 0.063 |  | NA | | | |
| Histological type oligodendroglioma vs astrocytoma | 0.303 | 0.065 | 1.408 | 0.128 |  | NA | | | |
| Histological type oligoastrocytoma vs astrocytoma | 2.274 | 0.282 | 18.303 | 0.44 |  | NA | | | |
| Gender male vs female | 1.53 | 0.46 | 5.091 | 0.488 |  | NA | | | |

**Abbreviations:** HR, hazards ratio; LCI, lower limit of 95% confidence interval; UCI, upper limit of 95% confidence interval
