# Supplementary material for: Clinical Significance and Molecular Annotation of Cellular Morphometric Subtypes in Lower Grade Gliomas discovered by Machine Learning: a retrospective multicentric study
Source: Research Square preprint supplement (doi:10.21203/rs.3.rs-770415/v1), 2021-08-12
Supplement: Supplementary file 10 [file ad2f2965c5e289b81b9c372c.xlsx]

## Sheet: Sheet1
Supplementary Table 22. Gene ontology (GO) functional enrichment analysis of the differentially expressed genes (DEGs) for cellular component.
ID	Description	GeneRatio	BgRatio	pvalue	p.adjust	qvalue	geneID	Count
GO:0005882	intermediate filament	17/258	214/19717	3.48132e-09	1.27416e-06	1.05905e-06	DES/KRT1/KRT13/KRT14/KRT15/KRT16/KRT17/KRT24/KRT31/KRT33B/KRT5/KRT6B/KRT75/KRT79/KRT84/NEFL/NEFM	17
GO:0045111	intermediate filament cytoskeleton	17/258	251/19717	3.75751e-08	6.87625e-06	5.71538e-06	DES/KRT1/KRT13/KRT14/KRT15/KRT16/KRT17/KRT24/KRT31/KRT33B/KRT5/KRT6B/KRT75/KRT79/KRT84/NEFL/NEFM	17
GO:0072562	blood microparticle	10/258	147/19717	2.44185e-05	0.00297906	0.00247612	ACTC1/AMBP/APOA2/FGB/FGG/HSPA6/IGHG4/IGHM/KNG1/KRT1	10
GO:0045095	keratin filament	8/258	95/19717	3.51179e-05	0.00321329	0.00267081	KRT1/KRT13/KRT14/KRT5/KRT6B/KRT75/KRT79/KRT84	8
GO:0062023	collagen-containing extracellular matrix	16/258	406/19717	9.584e-05	0.00701549	0.00583111	AMBP/ANXA8/APOC3/COL2A1/FGB/FGG/KNG1/KRT1/MUC2/MXRA5/MYOC/POSTN/PRG4/PRTN3/S100A7/SERPINA5	16
GO:0098862	cluster of actin-based cell projections	9/258	150/19717	0.000163319	0.00996244	0.00828054	CA4/CEACAM16/CLRN1/ESPN/ITLN1/SLC15A1/SLC34A2/SLC6A18/TRPA1	9
GO:0030140	trans-Golgi network transport vesicle	4/258	31/19717	0.000682446	0.0356822	0.0296582	CLRN1/NRGN/RASSF9/SLC18A3	4
GO:0012510	trans-Golgi network transport vesicle membrane	3/258	15/19717	0.000896842	0.0410305	0.0341036	NRGN/RASSF9/SLC18A3	3
GO:0001533	cornified envelope	5/258	65/19717	0.00160797	0.0653909	0.0543514	DSG2/DSG3/KRT1/SPRR2A/SPRR2B	5
GO:0005903	brush border	6/258	99/19717	0.00192369	0.0704069	0.0585206	CA4/ESPN/ITLN1/SLC15A1/SLC34A2/SLC6A18	6
GO:0097512	cardiac myofibril	2/258	7/19717	0.00342983	0.11412	0.0948537	DES/TNNT2	2
GO:0005577	fibrinogen complex	2/258	8/19717	0.00453373	0.118525	0.0985149	FGB/FGG	2
GO:0005883	neurofilament	2/258	8/19717	0.00453373	0.118525	0.0985149	NEFL/NEFM	2
GO:0034366	spherical high-density lipoprotein particle	2/258	8/19717	0.00453373	0.118525	0.0985149	APOA2/APOC3	2
GO:0031526	brush border membrane	4/258	53/19717	0.00507444	0.123816	0.102913	CA4/ITLN1/SLC34A2/SLC6A18	4
GO:0032421	stereocilium bundle	4/258	57/19717	0.00657311	0.126031	0.104754	CEACAM16/CLRN1/ESPN/TRPA1	4
GO:0031225	anchored component of membrane	7/258	170/19717	0.00716983	0.126031	0.104754	ALPG/CA4/GFRA3/ITLN1/LY6D/TEX101/UMOD	7
GO:0005687	U4 snRNP	2/258	13/19717	0.0120969	0.126031	0.104754	RNU4-1/RNU4-2	2
GO:0042627	chylomicron	2/258	13/19717	0.0120969	0.126031	0.104754	APOA2/APOC3	2
GO:0098691	dopaminergic synapse	2/258	13/19717	0.0120969	0.126031	0.104754	DRD3/SLC6A3	2
GO:0005585	collagen type II trimer	1/258	1/19717	0.0130852	0.126031	0.104754	COL2A1	1
GO:0036024	protein C inhibitor-TMPRSS7 complex	1/258	1/19717	0.0130852	0.126031	0.104754	SERPINA5	1
GO:0036025	protein C inhibitor-TMPRSS11E complex	1/258	1/19717	0.0130852	0.126031	0.104754	SERPINA5	1
GO:0036026	protein C inhibitor-PLAT complex	1/258	1/19717	0.0130852	0.126031	0.104754	SERPINA5	1
GO:0036027	protein C inhibitor-PLAU complex	1/258	1/19717	0.0130852	0.126031	0.104754	SERPINA5	1
GO:0036028	protein C inhibitor-thrombin complex	1/258	1/19717	0.0130852	0.126031	0.104754	SERPINA5	1
GO:0036029	protein C inhibitor-KLK3 complex	1/258	1/19717	0.0130852	0.126031	0.104754	SERPINA5	1
GO:0036030	protein C inhibitor-plasma kallikrein complex	1/258	1/19717	0.0130852	0.126031	0.104754	SERPINA5	1
GO:0070702	inner mucus layer	1/258	1/19717	0.0130852	0.126031	0.104754	MUC2	1
GO:0070703	outer mucus layer	1/258	1/19717	0.0130852	0.126031	0.104754	MUC2	1
GO:0071757	hexameric IgM immunoglobulin complex	1/258	1/19717	0.0130852	0.126031	0.104754	IGHM	1
GO:0097181	protein C inhibitor-coagulation factor V complex	1/258	1/19717	0.0130852	0.126031	0.104754	SERPINA5	1
GO:0097182	protein C inhibitor-coagulation factor Xa complex	1/258	1/19717	0.0130852	0.126031	0.104754	SERPINA5	1
GO:0097183	protein C inhibitor-coagulation factor XI complex	1/258	1/19717	0.0130852	0.126031	0.104754	SERPINA5	1
GO:0097728	9+0 motile cilium	1/258	1/19717	0.0130852	0.126031	0.104754	DNAH11	1
GO:0099182	presynaptic intermediate filament cytoskeleton	1/258	1/19717	0.0130852	0.126031	0.104754	NEFL	1
GO:0099192	cerebellar Golgi cell to granule cell synapse	1/258	1/19717	0.0130852	0.126031	0.104754	GABRA6	1
GO:0120134	proximal portion of axoneme	1/258	1/19717	0.0130852	0.126031	0.104754	DNAH11	1
GO:0044853	plasma membrane raft	5/258	109/19717	0.0143343	0.134522	0.111811	ADTRP/PRTN3/PTGS2/SELE/SLC6A3	5
GO:0031253	cell projection membrane	10/258	345/19717	0.0158466	0.144996	0.120517	CA4/GABRA6/GUCA1C/ITLN1/PLA2G4F/RHO/SLC34A2/SLC6A18/SSTR3/UMOD	10
GO:0042599	lamellar body	2/258	17/19717	0.0203806	0.181898	0.151189	SFTPA1/SFTPB	2
GO:0005901	caveola	4/258	80/19717	0.0208735	0.181898	0.151189	ADTRP/PTGS2/SELE/SLC6A3	4
GO:0032426	stereocilium tip	2/258	18/19717	0.0227328	0.190318	0.158188	CEACAM16/ESPN	2
GO:0034774	secretory granule lumen	9/258	321/19717	0.0259546	0.190318	0.158188	CHI3L1/CXCL1/FGB/FGG/HSPA6/KNG1/LCN2/PRTN3/S100A7	9
GO:0031533	mRNA cap methyltransferase complex	1/258	2/19717	0.0259997	0.190318	0.158188	RNMT	1
GO:0042643	actomyosin, actin portion	1/258	2/19717	0.0259997	0.190318	0.158188	ACTC1	1
GO:0060342	photoreceptor inner segment membrane	1/258	2/19717	0.0259997	0.190318	0.158188	RHO	1
GO:0070701	mucus layer	1/258	2/19717	0.0259997	0.190318	0.158188	MUC2	1
GO:0099160	postsynaptic intermediate filament cytoskeleton	1/258	2/19717	0.0259997	0.190318	0.158188	NEFL	1
GO:1904602	serotonin-activated cation-selective channel complex	1/258	2/19717	0.0259997	0.190318	0.158188	HTR3B	1
GO:0005581	collagen trimer	4/258	87/19717	0.0273903	0.191647	0.159293	C1QL4/COL2A1/MARCO/SFTPA1	4
GO:0034361	very-low-density lipoprotein particle	2/258	20/19717	0.0277522	0.191647	0.159293	APOA2/APOC3	2
GO:0034385	triglyceride-rich plasma lipoprotein particle	2/258	20/19717	0.0277522	0.191647	0.159293	APOA2/APOC3	2
GO:0045178	basal part of cell	3/258	51/19717	0.0290907	0.194261	0.161465	CLRN1/KRT14/MET	3
GO:0032420	stereocilium	3/258	52/19717	0.0305816	0.194261	0.161465	CEACAM16/CLRN1/ESPN	3
GO:0031091	platelet alpha granule	4/258	91/19717	0.0316014	0.194261	0.161465	FGB/FGG/KNG1/SERPINA5	4
GO:0060170	ciliary membrane	4/258	91/19717	0.0316014	0.194261	0.161465	GUCA1C/RHO/SSTR3/UMOD	4
GO:0060205	cytoplasmic vesicle lumen	9/258	338/19717	0.0344439	0.194261	0.161465	CHI3L1/CXCL1/FGB/FGG/HSPA6/KNG1/LCN2/PRTN3/S100A7	9
GO:0009897	external side of plasma membrane	10/258	393/19717	0.0347305	0.194261	0.161465	CA4/FGB/FGG/GFRA3/IGHG4/IGHM/IGHV4-31/IL31RA/IL5RA/SERPINA5	10
GO:0031983	vesicle lumen	9/258	339/19717	0.0349964	0.194261	0.161465	CHI3L1/CXCL1/FGB/FGG/HSPA6/KNG1/LCN2/PRTN3/S100A7	9
GO:0002080	acrosomal membrane	2/258	23/19717	0.0360221	0.194261	0.161465	SERPINA5/TMEM190	2
GO:0097381	photoreceptor disc membrane	2/258	23/19717	0.0360221	0.194261	0.161465	GUCA1C/RHO	2
GO:0030136	clathrin-coated vesicle	6/258	188/19717	0.0375636	0.194261	0.161465	CLRN1/NRGN/RASSF9/SFTPA1/SFTPB/SLC18A3	6
GO:0005896	interleukin-6 receptor complex	1/258	3/19717	0.038746	0.194261	0.161465	IL6	1
GO:0005927	muscle tendon junction	1/258	3/19717	0.038746	0.194261	0.161465	SMPX	1
GO:0060200	clathrin-sculpted acetylcholine transport vesicle	1/258	3/19717	0.038746	0.194261	0.161465	SLC18A3	1
GO:0060201	clathrin-sculpted acetylcholine transport vesicle membrane	1/258	3/19717	0.038746	0.194261	0.161465	SLC18A3	1
GO:0071753	IgM immunoglobulin complex	1/258	3/19717	0.038746	0.194261	0.161465	IGHM	1
GO:0071754	IgM immunoglobulin complex, circulating	1/258	3/19717	0.038746	0.194261	0.161465	IGHM	1
GO:0071756	pentameric IgM immunoglobulin complex	1/258	3/19717	0.038746	0.194261	0.161465	IGHM	1
GO:0097180	serine protease inhibitor complex	1/258	3/19717	0.038746	0.194261	0.161465	SERPINA5	1
GO:1990584	cardiac Troponin complex	1/258	3/19717	0.038746	0.194261	0.161465	TNNT2	1
GO:1990716	axonemal central apparatus	1/258	3/19717	0.038746	0.194261	0.161465	SPAG17	1
GO:0030057	desmosome	2/258	25/19717	0.0419945	0.207703	0.172638	DSG2/DSG3	2
GO:0034364	high-density lipoprotein particle	2/258	26/19717	0.04511	0.220137	0.182973	APOA2/APOC3	2
GO:0035580	specific granule lumen	3/258	62/19717	0.0476365	0.229407	0.190678	CHI3L1/CXCL1/LCN2	3
GO:0045334	clathrin-coated endocytic vesicle	3/258	63/19717	0.0495519	0.235532	0.195769	SFTPA1/SFTPB/SLC18A3	3
GO:0098858	actin-based cell projection	6/258	208/19717	0.0562825	0.264095	0.219509	ACPP/ACTC1/CEACAM16/CLCA1/CLRN1/ESPN	6
GO:0031093	platelet alpha granule lumen	3/258	67/19717	0.0575818	0.266771	0.221734	FGB/FGG/KNG1	3
GO:0044304	main axon	3/258	68/19717	0.0596798	0.271275	0.225477	CCK/CRH/MYOC	3
GO:0030660	Golgi-associated vesicle membrane	4/258	114/19717	0.062823	0.271275	0.225477	NRGN/RASSF9/RHO/SLC18A3	4
GO:0002079	inner acrosomal membrane	1/258	5/19717	0.0637421	0.271275	0.225477	TMEM190	1
GO:0034363	intermediate-density lipoprotein particle	1/258	5/19717	0.0637421	0.271275	0.225477	APOC3	1
GO:0097179	protease inhibitor complex	1/258	5/19717	0.0637421	0.271275	0.225477	SERPINA5	1
GO:0097418	neurofibrillary tangle	1/258	5/19717	0.0637421	0.271275	0.225477	NEFM	1
GO:1904090	peptidase inhibitor complex	1/258	5/19717	0.0637421	0.271275	0.225477	SERPINA5	1
GO:0045177	apical part of cell	9/258	384/19717	0.0664942	0.279734	0.232508	ABCB11/CA4/DRD3/DSG2/GJB6/P2RX2/SLC34A2/SLC6A18/UMOD	9
GO:0098589	membrane region	8/258	328/19717	0.0674989	0.280734	0.23334	ADTRP/ITLN1/PRTN3/PTGS2/SELE/SLC6A3/TEX101/TMEM190	8
GO:0042571	immunoglobulin complex, circulating	3/258	72/19717	0.0684233	0.281381	0.233877	IGHG4/IGHM/IGHV4-31	3
GO:0044449	contractile fiber part	6/258	221/19717	0.0709988	0.288728	0.239984	ACTC1/CSRP1/DES/MYH11/SMPX/TNNT2	6
GO:0046581	intercellular canaliculus	1/258	6/19717	0.0759963	0.299082	0.24859	ABCB11	1
GO:0097208	alveolar lamellar body	1/258	6/19717	0.0759963	0.299082	0.24859	SFTPB	1
GO:0097524	sperm plasma membrane	1/258	6/19717	0.0759963	0.299082	0.24859	LYZL6	1
GO:0031594	neuromuscular junction	3/258	76/19717	0.0777116	0.302579	0.251497	DES/NEFL/POSTN	3
GO:0008180	COP9 signalosome	2/258	36/19717	0.0803785	0.309669	0.257389	HSPA6/TESPA1	2
GO:0034358	plasma lipoprotein particle	2/258	37/19717	0.0842632	0.31609	0.262727	APOA2/APOC3	2
GO:1990777	lipoprotein particle	2/258	37/19717	0.0842632	0.31609	0.262727	APOA2/APOC3	2
GO:0005798	Golgi-associated vesicle	5/258	178/19717	0.0849714	0.31609	0.262727	CLRN1/NRGN/RASSF9/RHO/SLC18A3	5
GO:0043292	contractile fiber	6/258	234/19717	0.0877305	0.31609	0.262727	ACTC1/CSRP1/DES/MYH11/SMPX/TNNT2	6
GO:0030121	AP-1 adaptor complex	1/258	7/19717	0.0880907	0.31609	0.262727	SLC18A3	1
GO:0071546	pi-body	1/258	7/19717	0.0880907	0.31609	0.262727	ASZ1	1
GO:0097486	multivesicular body lumen	1/258	7/19717	0.0880907	0.31609	0.262727	SFTPB	1
GO:0032994	protein-lipid complex	2/258	39/19717	0.0921983	0.327617	0.272308	APOA2/APOC3	2
GO:0005902	microvillus	3/258	83/19717	0.0952002	0.331276	0.275348	CLCA1/CLRN1/ESPN	3
GO:0044447	axoneme part	2/258	40/19717	0.0962446	0.331276	0.275348	DNAH11/SPAG17	2
GO:0016600	flotillin complex	1/258	8/19717	0.100027	0.331276	0.275348	SLC6A3	1
GO:0043196	varicosity	1/258	8/19717	0.100027	0.331276	0.275348	CRH	1
GO:0043203	axon hillock	1/258	8/19717	0.100027	0.331276	0.275348	CCK	1
GO:0099569	presynaptic cytoskeleton	1/258	8/19717	0.100027	0.331276	0.275348	NEFL	1
GO:0099571	postsynaptic cytoskeleton	1/258	8/19717	0.100027	0.331276	0.275348	NEFL	1
GO:0005791	rough endoplasmic reticulum	3/258	85/19717	0.100469	0.331276	0.275348	CA4/MYOC/SFTPA1	3
GO:0046540	U4/U6 x U5 tri-snRNP complex	2/258	42/19717	0.104484	0.338419	0.281286	RNU4-1/RNU4-2	2
GO:0097526	spliceosomal tri-snRNP complex	2/258	42/19717	0.104484	0.338419	0.281286	RNU4-1/RNU4-2	2
GO:0097223	sperm part	5/258	191/19717	0.106417	0.341654	0.283974	LYZL6/PLCZ1/SERPINA5/TEX101/TMEM190	5
GO:0001750	photoreceptor outer segment	3/258	88/19717	0.108585	0.345584	0.287241	GUCA1C/PRPH2/RHO	3
GO:0005861	troponin complex	1/258	9/19717	0.111808	0.346796	0.288248	TNNT2	1
GO:0031906	late endosome lumen	1/258	9/19717	0.111808	0.346796	0.288248	SFTPB	1
GO:0044327	dendritic spine head	1/258	9/19717	0.111808	0.346796	0.288248	NRGN	1
GO:0045121	membrane raft	7/258	315/19717	0.120697	0.370308	0.307791	ADTRP/ITLN1/PRTN3/PTGS2/SELE/SLC6A3/TEX101	7
GO:0098857	membrane microdomain	7/258	316/19717	0.122144	0.370308	0.307791	ADTRP/ITLN1/PRTN3/PTGS2/SELE/SLC6A3/TEX101	7
GO:0005916	fascia adherens	1/258	10/19717	0.123436	0.370308	0.307791	DES	1
GO:0098981	cholinergic synapse	1/258	10/19717	0.123436	0.370308	0.307791	NEFL	1
GO:0016324	apical plasma membrane	7/258	318/19717	0.125064	0.372141	0.309315	CA4/DSG2/GJB6/P2RX2/SLC34A2/SLC6A18/UMOD	7
GO:0030017	sarcomere	5/258	204/19717	0.130252	0.379828	0.315704	ACTC1/CSRP1/DES/SMPX/TNNT2	5
GO:0097730	non-motile cilium	4/258	149/19717	0.131981	0.379828	0.315704	GUCA1C/PRPH2/RHO/SSTR3	4
GO:0005583	fibrillar collagen trimer	1/258	11/19717	0.134912	0.379828	0.315704	COL2A1	1
GO:0031094	platelet dense tubular network	1/258	11/19717	0.134912	0.379828	0.315704	SERPINA5	1
GO:0042589	zymogen granule membrane	1/258	11/19717	0.134912	0.379828	0.315704	CLCA1	1
GO:0061827	sperm head	1/258	11/19717	0.134912	0.379828	0.315704	PLCZ1	1
GO:0098643	banded collagen fibril	1/258	11/19717	0.134912	0.379828	0.315704	COL2A1	1
GO:0030658	transport vesicle membrane	5/258	208/19717	0.138036	0.385658	0.32055	CA4/NRGN/RASSF9/SCGN/SLC18A3	5
GO:0014704	intercalated disc	2/258	50/19717	0.139131	0.385772	0.320644	DES/DSG2	2
GO:0005771	multivesicular body	2/258	51/19717	0.143622	0.387848	0.32237	SFTPA1/SFTPB	2
GO:0043195	terminal bouton	2/258	51/19717	0.143622	0.387848	0.32237	CCK/SLC18A3	2
GO:0030133	transport vesicle	8/258	392/19717	0.14379	0.387848	0.32237	CA4/CLRN1/NRGN/NTF3/NTS/RASSF9/SCGN/SLC18A3	8
GO:0005845	mRNA cap binding complex	1/258	12/19717	0.146238	0.387848	0.32237	RNMT	1
GO:0048188	Set1C/COMPASS complex	1/258	12/19717	0.146238	0.387848	0.32237	DYDC1	1
GO:0060198	clathrin-sculpted vesicle	1/258	12/19717	0.146238	0.387848	0.32237	SLC18A3	1
GO:0005796	Golgi lumen	3/258	102/19717	0.149499	0.393645	0.327188	KERA/MUC2/UMOD	3
GO:0044441	ciliary part	9/258	462/19717	0.153668	0.401732	0.33391	AKAP14/DNAH11/GUCA1C/LYZL6/PRPH2/RHO/SPAG17/SSTR3/UMOD	9
GO:0005952	cAMP-dependent protein kinase complex	1/258	13/19717	0.157416	0.402378	0.334447	AKAP14	1
GO:0030130	clathrin coat of trans-Golgi network vesicle	1/258	13/19717	0.157416	0.402378	0.334447	SLC18A3	1
GO:0044666	MLL3/4 complex	1/258	13/19717	0.157416	0.402378	0.334447	DYDC1	1
GO:0042581	specific granule	4/258	160/19717	0.158313	0.402378	0.334447	CHI3L1/CXCL1/LCN2/PTPRB	4
GO:0001669	acrosomal vesicle	3/258	108/19717	0.168351	0.419403	0.348598	SERPINA5/TEX101/TMEM190	3
GO:0034518	RNA cap binding complex	1/258	14/19717	0.168449	0.419403	0.348598	RNMT	1
GO:0042588	zymogen granule	1/258	14/19717	0.168449	0.419403	0.348598	CLCA1	1
GO:0030016	myofibril	5/258	224/19717	0.17111	0.423151	0.351713	ACTC1/CSRP1/DES/SMPX/TNNT2	5
GO:0030135	coated vesicle	6/258	289/19717	0.179207	0.426218	0.354262	CLRN1/NRGN/RASSF9/SFTPA1/SFTPB/SLC18A3	6
GO:0005639	integral component of nuclear inner membrane	1/258	15/19717	0.179338	0.426218	0.354262	P2RX2	1
GO:0030122	AP-2 adaptor complex	1/258	15/19717	0.179338	0.426218	0.354262	SLC18A3	1
GO:0031229	intrinsic component of nuclear inner membrane	1/258	15/19717	0.179338	0.426218	0.354262	P2RX2	1
GO:0033268	node of Ranvier	1/258	15/19717	0.179338	0.426218	0.354262	MYOC	1
GO:0045120	pronucleus	1/258	15/19717	0.179338	0.426218	0.354262	PLCZ1	1
GO:0046658	anchored component of plasma membrane	2/258	59/19717	0.180515	0.426248	0.354287	CA4/TEX101	2
GO:0097733	photoreceptor cell cilium	3/258	113/19717	0.184558	0.433001	0.3599	GUCA1C/PRPH2/RHO	3
GO:0030128	clathrin coat of endocytic vesicle	1/258	16/19717	0.190084	0.437263	0.363443	SLC18A3	1
GO:0044453	nuclear membrane part	1/258	16/19717	0.190084	0.437263	0.363443	P2RX2	1
GO:0030665	clathrin-coated vesicle membrane	3/258	115/19717	0.191153	0.437263	0.363443	NRGN/RASSF9/SLC18A3	3
GO:0097731	9+0 non-motile cilium	3/258	115/19717	0.191153	0.437263	0.363443	GUCA1C/PRPH2/RHO	3
GO:0098793	presynapse	9/258	491/19717	0.195996	0.444932	0.369817	CCK/CHAT/IL31RA/NEFL/NTF3/NTS/SCGN/SLC18A3/SLC6A3	9
GO:0030667	secretory granule membrane	6/258	298/19717	0.196937	0.444932	0.369817	ACPP/CA4/CLCA1/PTPRB/SERPINA5/TMEM190	6
GO:0042622	photoreceptor outer segment membrane	1/258	17/19717	0.200691	0.450631	0.374554	RHO	1
GO:0005667	transcription factor complex	7/258	365/19717	0.203115	0.453294	0.376767	ALX4/ANHX/DMBX1/NPAS4/ONECUT3/PITX2/SIX3	7
GO:0043679	axon terminus	3/258	119/19717	0.204518	0.453657	0.377069	CCK/NTS/SLC18A3	3
GO:0005859	muscle myosin complex	1/258	18/19717	0.211159	0.465567	0.386968	MYH11	1
GO:0005930	axoneme	3/258	123/19717	0.21809	0.468632	0.389516	AKAP14/DNAH11/SPAG17	3
GO:0005788	endoplasmic reticulum lumen	6/258	309/19717	0.219452	0.468632	0.389516	APOA2/COL2A1/FGG/IL6/KNG1/PTGS2	6
GO:0031362	anchored component of external side of plasma membrane	1/258	19/19717	0.22149	0.468632	0.389516	CA4	1
GO:0043034	costamere	1/258	19/19717	0.22149	0.468632	0.389516	SMPX	1
GO:0098644	complex of collagen trimers	1/258	19/19717	0.22149	0.468632	0.389516	COL2A1	1
GO:1902711	GABA-A receptor complex	1/258	19/19717	0.22149	0.468632	0.389516	GABRA6	1
GO:0097014	ciliary plasm	3/258	124/19717	0.221512	0.468632	0.389516	AKAP14/DNAH11/SPAG17	3
GO:0005905	clathrin-coated pit	2/258	69/19717	0.228258	0.471097	0.391565	SELE/SLC18A3	2
GO:0030132	clathrin coat of coated pit	1/258	20/19717	0.231687	0.471097	0.391565	SLC18A3	1
GO:0043186	P granule	1/258	20/19717	0.231687	0.471097	0.391565	ASZ1	1
GO:0043194	axon initial segment	1/258	20/19717	0.231687	0.471097	0.391565	CCK	1
GO:0045495	pole plasm	1/258	20/19717	0.231687	0.471097	0.391565	ASZ1	1
GO:0060293	germ plasm	1/258	20/19717	0.231687	0.471097	0.391565	ASZ1	1
GO:1902710	GABA receptor complex	1/258	20/19717	0.231687	0.471097	0.391565	GABRA6	1
GO:0044291	cell-cell contact zone	2/258	71/19717	0.237927	0.481112	0.399889	DES/DSG2	2
GO:0005922	connexin complex	1/258	21/19717	0.241751	0.486158	0.404083	GJB6	1
GO:0016460	myosin II complex	1/258	22/19717	0.251683	0.497925	0.413863	MYH11	1
GO:0032982	myosin filament	1/258	22/19717	0.251683	0.497925	0.413863	MYH11	1
GO:0097225	sperm midpiece	1/258	22/19717	0.251683	0.497925	0.413863	LYZL6	1
GO:0043204	perikaryon	3/258	134/19717	0.256261	0.504256	0.419126	CCK/CRH/NGB	3
GO:0044306	neuron projection terminus	3/258	138/19717	0.270374	0.527898	0.438777	CCK/NTS/SLC18A3	3
GO:0031233	intrinsic component of external side of plasma membrane	1/258	24/19717	0.271161	0.527898	0.438777	CA4	1
GO:0042641	actomyosin	2/258	79/19717	0.276738	0.535905	0.445432	ACTC1/XIRP1	2
GO:0005811	lipid droplet	2/258	81/19717	0.286439	0.551772	0.45862	ALOX15/CIDEA	2
GO:0031674	I band	3/258	143/19717	0.28813	0.552123	0.458911	ACTC1/CSRP1/DES	3
GO:0032838	plasma membrane bounded cell projection cytoplasm	4/258	208/19717	0.289944	0.552706	0.459396	AKAP14/DNAH11/NEFL/SPAG17	4
GO:0031430	M band	1/258	28/19717	0.308614	0.585247	0.486444	SMPX	1
GO:0016323	basolateral plasma membrane	4/258	217/19717	0.316399	0.593207	0.49306	MET/SLC22A9/SLCO1B1/UMOD	4
GO:0030125	clathrin vesicle coat	1/258	29/19717	0.317674	0.593207	0.49306	SLC18A3	1
GO:0030131	clathrin adaptor complex	1/258	29/19717	0.317674	0.593207	0.49306	SLC18A3	1
GO:0034451	centriolar satellite	1/258	30/19717	0.326615	0.606808	0.504364	PAX2	1
GO:0005766	primary lysosome	3/258	155/19717	0.331017	0.608806	0.506025	ACPP/PRTN3/S100A7	3
GO:0042582	azurophil granule	3/258	155/19717	0.331017	0.608806	0.506025	ACPP/PRTN3/S100A7	3
GO:0035578	azurophil granule lumen	2/258	91/19717	0.334628	0.610801	0.507683	PRTN3/S100A7	2
GO:0005865	striated muscle thin filament	1/258	31/19717	0.33544	0.610801	0.507683	TNNT2	1
GO:0005921	gap junction	1/258	32/19717	0.34415	0.616531	0.512446	GJB6	1
GO:0031941	filamentous actin	1/258	32/19717	0.34415	0.616531	0.512446	ESPN	1
GO:0036379	myofilament	1/258	32/19717	0.34415	0.616531	0.512446	TNNT2	1
GO:0019814	immunoglobulin complex	3/258	159/19717	0.345325	0.616531	0.512446	IGHG4/IGHM/IGHV4-31	3
GO:0009925	basal plasma membrane	1/258	34/19717	0.361229	0.638695	0.530868	MET	1
GO:0031904	endosome lumen	1/258	34/19717	0.361229	0.638695	0.530868	SFTPB	1
GO:0030139	endocytic vesicle	5/258	303/19717	0.364161	0.640783	0.532604	DRD3/MARCO/SFTPA1/SFTPB/SLC18A3	5
GO:0097729	9+2 motile cilium	2/258	98/19717	0.367809	0.644105	0.535365	DNAH11/LYZL6	2
GO:0097525	spliceosomal snRNP complex	2/258	99/19717	0.372499	0.649212	0.53961	RNU4-1/RNU4-2	2
GO:0000421	autophagosome membrane	1/258	36/19717	0.377865	0.655444	0.54479	MCOLN3	1
GO:0033267	axon part	6/258	382/19717	0.383746	0.662505	0.550659	CCK/CRH/MYOC/NEFL/NTS/SLC18A3	6
GO:0005775	vacuolar lumen	3/258	172/19717	0.39155	0.672805	0.559219	KERA/PRTN3/S100A7	3
GO:0030175	filopodium	2/258	104/19717	0.39573	0.67681	0.562548	ACPP/ACTC1	2
GO:0030532	small nuclear ribonucleoprotein complex	2/258	105/19717	0.40033	0.681191	0.56619	RNU4-1/RNU4-2	2
GO:0031672	A band	1/258	39/19717	0.402014	0.681191	0.56619	SMPX	1
GO:0032590	dendrite membrane	1/258	40/19717	0.409854	0.691275	0.574572	GABRA6	1
GO:0045211	postsynaptic membrane	5/258	323/19717	0.415953	0.695437	0.57803	DRD3/GABRA6/HTR3B/NRGN/SLC6A3	5
GO:0031514	motile cilium	3/258	179/19717	0.416122	0.695437	0.57803	DNAH11/LYZL6/SPAG17	3
GO:0030662	coated vesicle membrane	3/258	182/19717	0.426557	0.708107	0.588562	NRGN/RASSF9/SLC18A3	3
GO:0005884	actin filament	2/258	111/19717	0.427573	0.708107	0.588562	ACTC1/ESPN	2
GO:0005770	late endosome	4/258	256/19717	0.431628	0.711603	0.591468	ANXA8/MCOLN3/SFTPA1/SFTPB	4
GO:0034708	methyltransferase complex	2/258	113/19717	0.43651	0.716425	0.595476	DYDC1/RNMT	2
GO:0030669	clathrin-coated endocytic vesicle membrane	1/258	44/19717	0.440205	0.719263	0.597834	SLC18A3	1
GO:0030119	AP-type membrane coat adaptor complex	1/258	45/19717	0.447546	0.728008	0.605103	SLC18A3	1
GO:0120114	Sm-like protein family complex	2/258	116/19717	0.449774	0.728395	0.605424	RNU4-1/RNU4-2	2
GO:0099055	integral component of postsynaptic membrane	2/258	117/19717	0.454156	0.73006	0.606809	DRD3/SLC6A3	2
GO:0030118	clathrin coat	1/258	46/19717	0.454791	0.73006	0.606809	SLC18A3	1
GO:0098936	intrinsic component of postsynaptic membrane	2/258	122/19717	0.475762	0.756127	0.628475	DRD3/SLC6A3	2
GO:0001917	photoreceptor inner segment	1/258	49/19717	0.475965	0.756127	0.628475	RHO	1
GO:0034707	chloride channel complex	1/258	50/19717	0.482839	0.756127	0.628475	GABRA6	1
GO:0099061	integral component of postsynaptic density membrane	1/258	50/19717	0.482839	0.756127	0.628475	DRD3	1
GO:1904813	ficolin-1-rich granule lumen	2/258	124/19717	0.484259	0.756127	0.628475	HSPA6/KRT1	2
GO:0005782	peroxisomal matrix	1/258	51/19717	0.489623	0.756127	0.628475	AGXT	1
GO:0030286	dynein complex	1/258	51/19717	0.489623	0.756127	0.628475	DNAH11	1
GO:0031907	microbody lumen	1/258	51/19717	0.489623	0.756127	0.628475	AGXT	1
GO:0044420	extracellular matrix component	1/258	51/19717	0.489623	0.756127	0.628475	COL2A1	1
GO:0097060	synaptic membrane	6/258	432/19717	0.499001	0.766964	0.637482	DRD3/GABRA6/HTR3B/IL31RA/NRGN/SLC6A3	6
GO:0098878	neurotransmitter receptor complex	1/258	53/19717	0.502927	0.766964	0.637482	HTR3B	1
GO:0099146	intrinsic component of postsynaptic density membrane	1/258	53/19717	0.502927	0.766964	0.637482	DRD3	1
GO:0150034	distal axon	4/258	285/19717	0.514026	0.779263	0.647705	CCK/NEFL/NTS/SLC18A3	4
GO:1904724	tertiary granule lumen	1/258	55/19717	0.515886	0.779263	0.647705	CXCL1	1
GO:0030018	Z disc	2/258	132/19717	0.517379	0.779263	0.647705	CSRP1/DES	2
GO:0031902	late endosome membrane	2/258	134/19717	0.525437	0.782793	0.650639	ANXA8/MCOLN3	2
GO:0016328	lateral plasma membrane	1/258	57/19717	0.528507	0.782793	0.650639	DSG2	1
GO:0032589	neuron projection membrane	1/258	57/19717	0.528507	0.782793	0.650639	GABRA6	1
GO:1904115	axon cytoplasm	1/258	57/19717	0.528507	0.782793	0.650639	NEFL	1
GO:0005637	nuclear inner membrane	1/258	58/19717	0.534695	0.782793	0.650639	P2RX2	1
GO:0030120	vesicle coat	1/258	58/19717	0.534695	0.782793	0.650639	SLC18A3	1
GO:0035577	azurophil granule membrane	1/258	58/19717	0.534695	0.782793	0.650639	ACPP	1
GO:0005876	spindle microtubule	1/258	59/19717	0.540801	0.788579	0.655448	CAPN6	1
GO:0005911	cell-cell junction	6/258	459/19717	0.558253	0.810796	0.673914	ABCB11/DES/DSG2/DSG3/GJB6/RHO	6
GO:0016459	myosin complex	1/258	65/19717	0.5758	0.832976	0.69235	MYH11	1
GO:0031901	early endosome membrane	2/258	149/19717	0.582933	0.839034	0.697385	MCOLN3/OR51E2	2
GO:0001725	stress fiber	1/258	67/19717	0.586865	0.839034	0.697385	XIRP1	1
GO:0097517	contractile actin filament bundle	1/258	67/19717	0.586865	0.839034	0.697385	XIRP1	1
GO:0099699	integral component of synaptic membrane	2/258	152/19717	0.5938	0.845646	0.702881	DRD3/SLC6A3	2
GO:0098982	GABA-ergic synapse	1/258	71/19717	0.608141	0.846076	0.703239	DRD3	1
GO:0031252	cell leading edge	5/258	403/19717	0.60964	0.846076	0.703239	ACTC1/CLRN1/GABRA6/KDF1/PLA2G4F	5
GO:0018995	host	1/258	73/19717	0.618366	0.846076	0.703239	CLEC4M	1
GO:0043657	host cell	1/258	73/19717	0.618366	0.846076	0.703239	CLEC4M	1
GO:0070821	tertiary granule membrane	1/258	73/19717	0.618366	0.846076	0.703239	PTPRB	1
GO:0099056	integral component of presynaptic membrane	1/258	73/19717	0.618366	0.846076	0.703239	SLC6A3	1
GO:0005924	cell-substrate adherens junction	5/258	408/19717	0.620512	0.846076	0.703239	ACTC1/CSRP1/S100A7/SMPX/XIRP1	5
GO:0098839	postsynaptic density membrane	1/258	74/19717	0.623378	0.846076	0.703239	DRD3	1
GO:0099060	integral component of postsynaptic specialization membrane	1/258	74/19717	0.623378	0.846076	0.703239	DRD3	1
GO:0042734	presynaptic membrane	2/258	161/19717	0.625131	0.846076	0.703239	IL31RA/SLC6A3	2
GO:0032432	actin filament bundle	1/258	75/19717	0.628325	0.846076	0.703239	XIRP1	1
GO:0030055	cell-substrate junction	5/258	412/19717	0.629081	0.846076	0.703239	ACTC1/CSRP1/S100A7/SMPX/XIRP1	5
GO:0070820	tertiary granule	2/258	164/19717	0.635152	0.846076	0.703239	CXCL1/PTPRB	2
GO:0099240	intrinsic component of synaptic membrane	2/258	164/19717	0.635152	0.846076	0.703239	DRD3/SLC6A3	2
GO:0043025	neuronal cell body	6/258	497/19717	0.635665	0.846076	0.703239	CCK/CRH/NGB/NRGN/P2RX2/SLC6A3	6
GO:0044215	other organism	1/258	77/19717	0.638025	0.846076	0.703239	CLEC4M	1
GO:0044216	other organism cell	1/258	77/19717	0.638025	0.846076	0.703239	CLEC4M	1
GO:0044217	other organism part	1/258	77/19717	0.638025	0.846076	0.703239	CLEC4M	1
GO:0098948	intrinsic component of postsynaptic specialization membrane	1/258	77/19717	0.638025	0.846076	0.703239	DRD3	1
GO:0030666	endocytic vesicle membrane	2/258	167/19717	0.644962	0.852189	0.708319	MARCO/SLC18A3	2
GO:0005758	mitochondrial intermembrane space	1/258	79/19717	0.647473	0.852428	0.708518	MYOC	1
GO:0031256	leading edge membrane	2/258	170/19717	0.654564	0.858135	0.713262	GABRA6/PLA2G4F	2
GO:0016234	inclusion body	1/258	82/19717	0.661186	0.858135	0.713262	NEFM	1
GO:0098685	Schaffer collateral - CA1 synapse	1/258	82/19717	0.661186	0.858135	0.713262	NEFL	1
GO:0098889	intrinsic component of presynaptic membrane	1/258	82/19717	0.661186	0.858135	0.713262	SLC6A3	1
GO:0120111	neuron projection cytoplasm	1/258	84/19717	0.670032	0.866543	0.72025	NEFL	1
GO:0005769	early endosome	4/258	350/19717	0.675015	0.869913	0.723051	APOA2/APOC3/MCOLN3/OR51E2	4
GO:0035097	histone methyltransferase complex	1/258	86/19717	0.678647	0.871526	0.724392	DYDC1	1
GO:0008076	voltage-gated potassium channel complex	1/258	87/19717	0.682871	0.873883	0.726351	KCNS1	1
GO:0031970	organelle envelope lumen	1/258	88/19717	0.687039	0.876154	0.728238	MYOC	1
GO:0031234	extrinsic component of cytoplasmic side of plasma membrane	1/258	91/19717	0.699218	0.879474	0.730998	ALOX15	1
GO:0035579	specific granule membrane	1/258	91/19717	0.699218	0.879474	0.730998	PTPRB	1
GO:0044450	microtubule organizing center part	2/258	185/19717	0.699495	0.879474	0.730998	HSPA6/PAX2	2
GO:0101002	ficolin-1-rich granule	2/258	185/19717	0.699495	0.879474	0.730998	HSPA6/KRT1	2
GO:0005776	autophagosome	1/258	93/19717	0.707075	0.879474	0.730998	MCOLN3	1
GO:0036126	sperm flagellum	1/258	93/19717	0.707075	0.879474	0.730998	LYZL6	1
GO:0032587	ruffle membrane	1/258	94/19717	0.710926	0.879474	0.730998	PLA2G4F	1
GO:0005604	basement membrane	1/258	95/19717	0.714726	0.879474	0.730998	COL2A1	1
GO:0043202	lysosomal lumen	1/258	95/19717	0.714726	0.879474	0.730998	KERA	1
GO:0030117	membrane coat	1/258	96/19717	0.718477	0.879474	0.730998	SLC18A3	1
GO:0034705	potassium channel complex	1/258	96/19717	0.718477	0.879474	0.730998	KCNS1	1
GO:0048475	coated membrane	1/258	96/19717	0.718477	0.879474	0.730998	SLC18A3	1
GO:0030027	lamellipodium	2/258	193/19717	0.72142	0.880132	0.731545	ACTC1/CLRN1	2
GO:0044438	microbody part	1/258	100/19717	0.732996	0.888333	0.738361	AGXT	1
GO:0044439	peroxisomal part	1/258	100/19717	0.732996	0.888333	0.738361	AGXT	1
GO:0099634	postsynaptic specialization membrane	1/258	101/19717	0.736508	0.889643	0.73945	DRD3	1
GO:0032993	protein-DNA complex	2/258	202/19717	0.744462	0.893746	0.742861	H3C14/PAX2	2
GO:0019898	extrinsic component of membrane	3/258	295/19717	0.744788	0.893746	0.742861	ALOX15/GFRA3/UMOD	3
GO:0042470	melanosome	1/258	106/19717	0.753387	0.896564	0.745203	MYH11	1
GO:0048770	pigment granule	1/258	106/19717	0.753387	0.896564	0.745203	MYH11	1
GO:0000786	nucleosome	1/258	107/19717	0.756632	0.896564	0.745203	H3C14	1
GO:0034702	ion channel complex	3/258	301/19717	0.756935	0.896564	0.745203	GABRA6/HTR3B/KCNS1	3
GO:0016363	nuclear matrix	1/258	109/19717	0.762994	0.897928	0.746337	LGALS13	1
GO:0072686	mitotic spindle	1/258	109/19717	0.762994	0.897928	0.746337	KDF1	1
GO:0005938	cell cortex	3/258	308/19717	0.770515	0.903874	0.751279	FGB/KDF1/SELE	3
GO:0005925	focal adhesion	4/258	405/19717	0.779344	0.90845	0.755082	ACTC1/CSRP1/S100A7/XIRP1	4
GO:0044815	DNA packaging complex	1/258	115/19717	0.781102	0.90845	0.755082	H3C14	1
GO:0030863	cortical cytoskeleton	1/258	116/19717	0.783983	0.90845	0.755082	SELE	1
GO:0034703	cation channel complex	2/258	220/19717	0.785686	0.90845	0.755082	HTR3B/KCNS1	2
GO:0005913	cell-cell adherens junction	1/258	117/19717	0.786827	0.90845	0.755082	DES	1
GO:0005874	microtubule	4/258	416/19717	0.796688	0.916943	0.762141	CAPN6/CLRN1/DNAH11/SPAG17	4
GO:1902495	transmembrane transporter complex	3/258	324/19717	0.799241	0.916998	0.762187	GABRA6/HTR3B/KCNS1	3
GO:0005793	endoplasmic reticulum-Golgi intermediate compartment	1/258	126/19717	0.810796	0.926338	0.76995	CA4	1
GO:1990351	transporter complex	3/258	332/19717	0.812444	0.926338	0.76995	GABRA6/HTR3B/KCNS1	3
GO:0005802	trans-Golgi network	2/258	236/19717	0.817318	0.929002	0.772164	CA4/POSTN	2
GO:0034399	nuclear periphery	1/258	131/19717	0.822932	0.931658	0.774372	LGALS13	1
GO:0001650	fibrillar center	1/258	132/19717	0.825264	0.931658	0.774372	RNMT	1
GO:0005777	peroxisome	1/258	134/19717	0.829838	0.931658	0.774372	AGXT	1
GO:0042579	microbody	1/258	134/19717	0.829838	0.931658	0.774372	AGXT	1
GO:0042383	sarcolemma	1/258	136/19717	0.834292	0.931993	0.774651	DES	1
GO:0005819	spindle	3/258	347/19717	0.835229	0.931993	0.774651	CAPN6/KDF1/UMOD	3
GO:0098978	glutamatergic synapse	3/258	349/19717	0.83808	0.932332	0.774933	ACTC1/DRD3/NRGN	3
GO:0005814	centriole	1/258	139/19717	0.840757	0.932475	0.775052	HSPA6	1
GO:0005765	lysosomal membrane	3/258	354/19717	0.845024	0.933059	0.775537	ACPP/MCOLN3/PLA2G4F	3
GO:0098852	lytic vacuole membrane	3/258	355/19717	0.846382	0.933059	0.775537	ACPP/MCOLN3/PLA2G4F	3
GO:0005875	microtubule associated complex	1/258	152/19717	0.865988	0.951807	0.791119	DNAH11	1
GO:0009898	cytoplasmic side of plasma membrane	1/258	154/19717	0.869499	0.952805	0.791949	ALOX15	1
GO:0000922	spindle pole	1/258	164/19717	0.885727	0.954684	0.793511	UMOD	1
GO:0019897	extrinsic component of plasma membrane	1/258	165/19717	0.887235	0.954684	0.793511	ALOX15	1
GO:0043197	dendritic spine	1/258	169/19717	0.893071	0.954684	0.793511	NRGN	1
GO:0030426	growth cone	1/258	171/19717	0.895875	0.954684	0.793511	NEFL	1
GO:0044309	neuron spine	1/258	171/19717	0.895875	0.954684	0.793511	NRGN	1
GO:0001726	ruffle	1/258	172/19717	0.897249	0.954684	0.793511	PLA2G4F	1
GO:0098802	plasma membrane receptor complex	2/258	295/19717	0.900875	0.954684	0.793511	HTR3B/IL6	2
GO:0031965	nuclear membrane	2/258	296/19717	0.901923	0.954684	0.793511	GTPBP4/P2RX2	2
GO:0030427	site of polarized growth	1/258	176/19717	0.902568	0.954684	0.793511	NEFL	1
GO:0055037	recycling endosome	1/258	176/19717	0.902568	0.954684	0.793511	RASSF9	1
GO:0005741	mitochondrial outer membrane	1/258	178/19717	0.905124	0.954684	0.793511	MYOC	1
GO:0044452	nucleolar part	1/258	178/19717	0.905124	0.954684	0.793511	RNMT	1
GO:0098562	cytoplasmic side of membrane	1/258	178/19717	0.905124	0.954684	0.793511	ALOX15	1
GO:0005774	vacuolar membrane	3/258	412/19717	0.908462	0.955451	0.794148	ACPP/MCOLN3/PLA2G4F	3
GO:0044448	cell cortex part	1/258	184/19717	0.912398	0.956842	0.795304	SELE	1
GO:0008021	synaptic vesicle	1/258	191/19717	0.920185	0.96225	0.7998	NTF3	1
GO:0014069	postsynaptic density	2/258	324/19717	0.927389	0.963555	0.800884	DRD3/NRGN	2
GO:0031968	organelle outer membrane	1/258	201/19717	0.930128	0.963555	0.800884	MYOC	1
GO:0032279	asymmetric synapse	2/258	328/19717	0.930474	0.963555	0.800884	DRD3/NRGN	2
GO:0019867	outer membrane	1/258	203/19717	0.931963	0.963555	0.800884	MYOC	1
GO:0070382	exocytic vesicle	1/258	207/19717	0.935491	0.963668	0.800978	NTF3	1
GO:0036464	cytoplasmic ribonucleoprotein granule	1/258	212/19717	0.939645	0.963668	0.800978	ASZ1	1
GO:0031301	integral component of organelle membrane	1/258	214/19717	0.941231	0.963668	0.800978	P2RX2	1
GO:0099572	postsynaptic specialization	2/258	348/19717	0.944128	0.963668	0.800978	DRD3/NRGN	2
GO:0098984	neuron to neuron synapse	2/258	350/19717	0.945345	0.963668	0.800978	DRD3/NRGN	2
GO:0035770	ribonucleoprotein granule	1/258	223/19717	0.94787	0.963668	0.800978	ASZ1	1
GO:0010008	endosome membrane	3/258	479/19717	0.951913	0.965098	0.802166	ANXA8/MCOLN3/OR51E2	3
GO:0031300	intrinsic component of organelle membrane	1/258	237/19717	0.956744	0.967315	0.80401	P2RX2	1
GO:0005635	nuclear envelope	2/258	464/19717	0.984957	0.993097	0.825439	GTPBP4/P2RX2	2
GO:0000790	nuclear chromatin	1/258	377/19717	0.993355	0.998175	0.82966	PHOX2B	1
GO:0005759	mitochondrial matrix	1/258	469/19717	0.998074	0.998175	0.82966	AGXT	1
GO:0005743	mitochondrial inner membrane	1/258	473/19717	0.998175	0.998175	0.82966	MYOC	1
