# Supplementary material for: Clinical Significance and Molecular Annotation of Cellular Morphometric Subtypes in Lower Grade Gliomas discovered by Machine Learning: a retrospective multicentric study
Source: Research Square preprint supplement (doi:10.21203/rs.3.rs-770415/v1), 2021-08-12
Supplement: Supplementary file 11 [file c956087586207d858d14259d.docx]

**Supplementary Table 19. Cox proportional hazards regression model on the overall survival of patients in Pooled-GBM cohort**

| Variable | Univariate analysis | | | |  | Multivariable analysis | | | |
| --- | --- | --- | --- | --- | --- | --- | --- | --- | --- |
| HR | LCI | UCI | P value |  | HR | LCI | UCI | P value |
| Subtype 2 vs 1 | 1.73 | 1.38 | 2.19 | <0.001 |  | 1.521 | 1.173 | 1.974 | 0.002 |
| Age | 1.03 | 1.02 | 1.04 | <0.001 |  | 1.027 | 1.017 | 1.038 | <0.001 |
| IDH wild type vs Mutant | 2.65 | 1.63 | 4.32 | <0.001 |  | 1.944 | 1.159 | 3.261 | 0.012 |
| Male vs female | 1.02 | 0.826 | 1.26 | 0.849 |  | 1.152 | 0.902 | 1.47 | 0.257 |

**Abbreviations:** HR, hazards ratio; LCI, lower limit of 95% confidence interval; UCI, upper limit of 95% confidence interval
